# Supplementary material for: Pd(ii)-catalyzed β- and γ-C-(sp3)–H dienylation with allenyl acetates
Source: Royal Society of Chemistry journal article supplement (doi:10.1039/d2sc05188e), 2022-12-20

***Pd(II)-Catalyzed  $\beta$ - and  $\gamma$ -C-(Sp<sup>3</sup>)-H Dienylation with Allenyl Acetates***

Rahul K. Shukla, Akshay M. Nair and Chandra M. R. Volla\*

Department of Chemistry, Indian Institute of Technology Bombay, Powai, Mumbai 400076,

India

E-mail: [chandra.volla@chem.iitb.ac.in](mailto:chandra.volla@chem.iitb.ac.in)

## **Table of Contents**

|                                                                                   |            |
|-----------------------------------------------------------------------------------|------------|
| <b>1. General considerations and reagent information.</b>                         | <b>S3</b>  |
| <b>2. General procedure for the synthesis of amides.</b>                          | <b>S3</b>  |
| <b>3. General Procedure for the preparation of various Allenyl Leaving group.</b> | <b>S4</b>  |
| <b>4. Optimization details of acyclic carboxamide.</b>                            | <b>S6</b>  |
| <b>5. Optimization details of cyclopropane carboxamide.</b>                       | <b>S12</b> |
| <b>6. General procedure for <math>\text{sp}^3</math> C-H dienylation.</b>         | <b>S13</b> |
| <b>7. Spectroscopic data for new compounds.</b>                                   | <b>S14</b> |
| <b>8. One pot synthesis.</b>                                                      | <b>S52</b> |
| <b>9. Gram scale and further functionalization.</b>                               | <b>S53</b> |
| <b>10. Mechanistic studies</b>                                                    | <b>S57</b> |
| <b>11. References</b>                                                             | <b>S66</b> |
| <b>12. <math>^1\text{H}</math> and <math>^{13}\text{C}</math> NMR spectra's</b>   | <b>S68</b> |

## **1. General considerations and reagent information**

Unless otherwise stated, all reactions were carried out under air atmosphere in screw cap reaction tubes. All the solvents were bought from Aldrich in sure-seal bottle and were used as received. Pd(OAc)<sub>2</sub> and other reagents were bought from Aldrich. The reactions were performed using IKA RCT basic stirrer equipped with oil bath for heating. For column chromatography, silica gel (100–200 mesh) from Finar Co. was used. A gradient elution using petroleum ether and ethyl acetate was performed based on Merck aluminum TLC sheets (silica gel 60F254). All directing groups attached to the aliphatic acids and allenes were prepared according to the reported procedures in the literatures and the analytical data are in accord with the literature. Analytical information of All new isolated compounds are characterized by <sup>1</sup>H NMR, <sup>13</sup>C NMR spectroscopy. In addition, all the compounds are further characterized by HRMS. Copies of <sup>1</sup>H NMR and <sup>13</sup>C NMR can be found in the supporting information. Nuclear magnetic resonance spectra were recorded either on a Bruker 500 or a 400 MHz instrument. All <sup>1</sup>H NMR experiments are reported in units, parts per million (ppm), and were measured relative to the signals for residual chloroform (7.26 ppm) in the deuterated solvent, unless otherwise stated. All <sup>13</sup>C NMR spectra were reported in ppm relative to deuterium chloroform (77.16 ppm), unless otherwise stated, and all were obtained with <sup>1</sup>H decoupling.

## **2. General procedure for the preparation of 8-aminoquinolinyl amides Synthesis of Amides from Carboxylic Acids<sup>1</sup>**

To a stirred solution of carboxylic acid (15 mmol) in CH<sub>2</sub>Cl<sub>2</sub> (10 mL), (COCl)<sub>2</sub>, (1.5 mL, 18 mmol) was added dropwise. The solution was magnetically stirred at room temperature for 2 h. The solvent was then eliminated under reduced pressure, and the resulting residue was dissolved in CH<sub>2</sub>Cl<sub>2</sub> (15 mL). After cooling the reaction mixture to 0 °C, a solution of 8-Aminoquinoline (15 mmol) and triethylamine (36 mmol) in 10 mL of the same solvent were added dropwise. The resulting mixture was allowed to warm to rt and stirred overnight. The crude product was washed with saturated aqueous NaHCO<sub>3</sub> (20 mL), and CH<sub>2</sub>Cl<sub>2</sub> (3x20 mL). The organic phase was washed with 1 M HCl aq. (20 mL). The organic phase was dried over anhydrous Na<sub>2</sub>SO<sub>4</sub> and the solvent removed by evaporation of the solvent. The resulting crude amide was purified by flash chromatography on silica gel (eluent: hexanes/EtOAc = 9/1).

---

**Carboxamide for C-H activation**

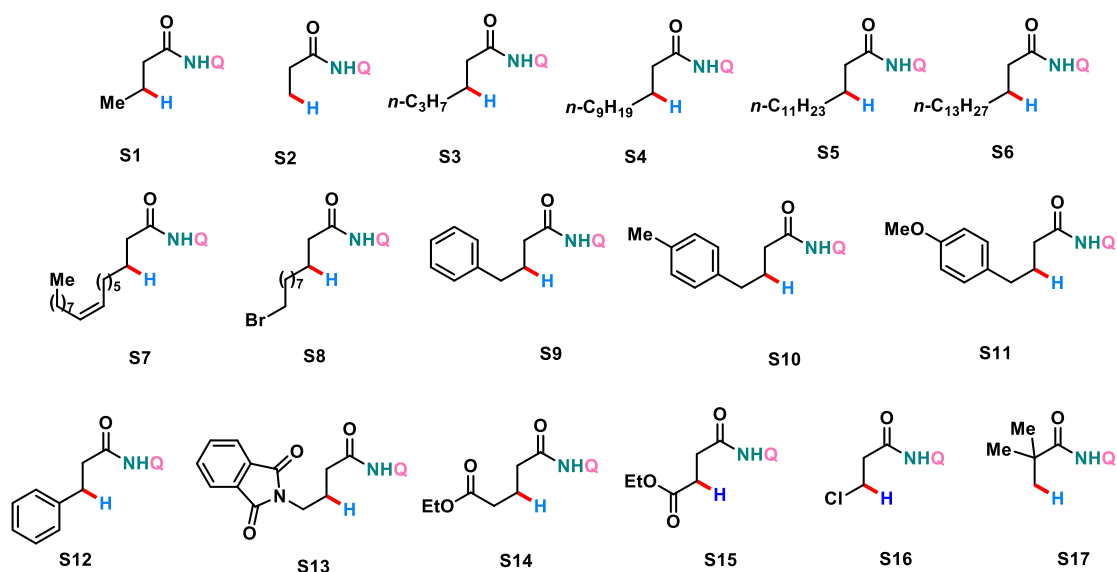

**Cyclic carboxamide for C-H activation**

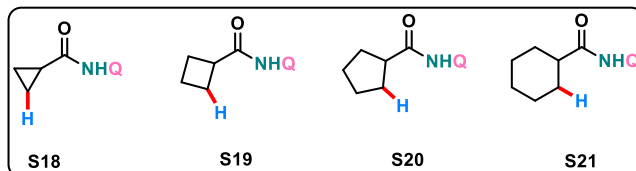

**Carboxamide For C-H activation**

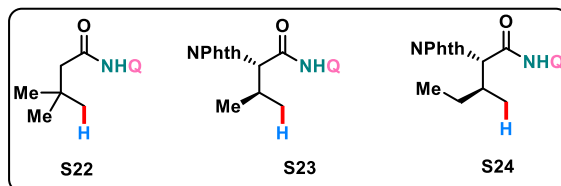

---

**3. General Procedure for the preparation of allenyl Alcohols and Allenyl Acetates<sup>2,3</sup>:**

**Step 1:** To a two-necked round bottom-flask equipped with a magnetic stir bar were added under nitrogen CuI (10 mol%), paraformaldehyde (1.6 equiv.) and 1,4-dioxane followed by propargylic alcohol (S1, 1 equiv.) and *N,N*-Di-isopropyl-amine (1.4 equiv.). The reaction mixture was refluxed for 6 hours and then cooled to room temperature. Then the mixture was filtered through a Celite plug and diluted with water followed by diethyl ether and acidified with 6 *N* HCl to pH 2. The organic layer was separated and the aqueous phase was extracted with diethyl ether for two additional times. The organic phase was then washed with saturated  $\text{NaHCO}_3$ , brine and dried over  $\text{MgSO}_4$ . After filtration and evaporation under reduced pressure, the residue was directly used for the next step.



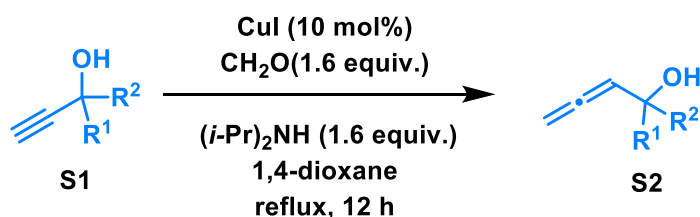

## Step 2:

**(a) Preparation of allenyl acetate:** To a solution of **S2** (16.5 mmol) in Et<sub>2</sub>O (50 mL) were added Ac<sub>2</sub>O (2.4 mL, d = 1.08 g/mL, 2.53 g, 25 mmol, 1.5 equiv.), Et<sub>3</sub>N (3.6 mL, d = 0.70 g/mL, 2.52 g, 25 mmol, 1.5 equiv.), and DMAP (0.7001 g, 5.7 mmol, 35 mol %). The resulting mixture was stirred at room temperature until complete conversion of **S2** as monitored by TLC. The reaction mixture was then quenched with water (10 mL), extracted with Et<sub>2</sub>O (3 × 40 mL), sequentially washed with 5% HCl, sat. NaHCO<sub>3</sub>(aq.), brine, and dried over anhydrous Na<sub>2</sub>SO<sub>4</sub>. After filtration and evaporation, flash chromatography on silica gel (eluent: petroleum ether/diethyl ether = 100/1)

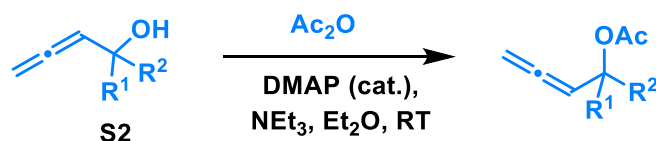

**(b) Preparation of allenyl carbinol carbonates:** To a round bottom flask equipped with a magnetic stir bar were added under argon allenol **S2** (1equiv.), DMAP (122 mg, 1.0 mmol, 0.2 equiv.), pyridine (790 mg, 10 mmol, 2.0 equiv.) and dichloromethane (0.3 M). The mixture was cooled to 0 °C and then methyl chloroformate (708.8 mg, 7.5 mmol, 1.5 equiv.) was slowly added. The reaction was allowed to stir at room temperature until completion). The mixture was diluted with dichloromethane and washed successively with 1N HCl, saturated NaHCO<sub>3</sub>, and brine. The organic phase was dried over MgSO<sub>4</sub>, filtered and evaporated under reduced pressure. The residue was purified by flash column chromatography to yield the desired product.

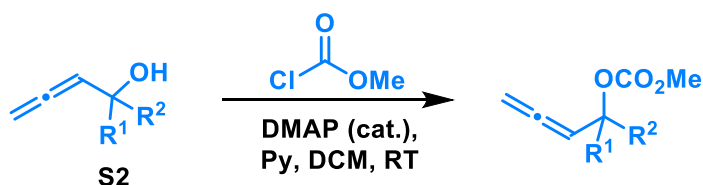

**(c) Boc protection of allenylic alcohols:** A dried 100 mL RBF containing a magnetic

stir-bar was charged with allenyl alcohol derivative (**S2**, 1.0 equiv.). The flask was fitted with a rubber septum and **S2** was dissolved in Dry THF (0.35 M). The resulting homogeneous solution was cooled to -78 °C. *n*-BuLi (1.1 equiv., 1.6 M in hexanes) was added drop-wise over 5 minutes, which resulted in a darkly colored solution once the addition was >90% complete. The resulting solution was stirred at this temperature for 30 minutes before a freshly prepared 1 M THF solution of Boc<sub>2</sub>O (1.00 equiv.) was added over 5 minutes. The solution was allowed to stir for 30 minutes at this temperature before all excess CO<sub>2</sub>(s) were removed from the cold bath. Then the reaction was allowed to slowly warm to room temperature and stirred for 12 hours. After which, the dark reddish/purple solution was cooled to 0 °C and quenched by the addition of water (50 mL). After stirring the biphasic mixture for 10 minutes, it was warmed to room temperature, diluted with EtOAc (50 mL) and transferred to a separatory funnel. The layers were separated, and the aqueous phase was extracted with EtOAc (2 x 50 mL). The combined organic layers were washed with brine (50 mL), dried over Na<sub>2</sub>SO<sub>4</sub>, filtered and concentrated. This crude residue was typically of high purity (<sup>1</sup>H NMR) and could be used without further purification.

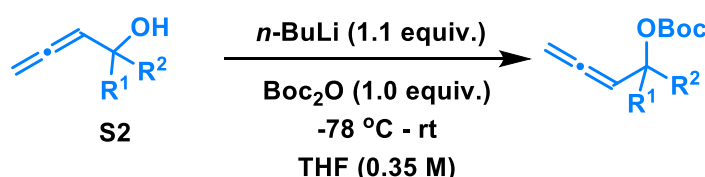

#### **4. Optimization for the Dienylation of Unactivated sp<sup>3</sup> C-H bond.**

**4a) Isolation of Int-A:-** The Int-A was synthesized by following the previously known reported procedure.<sup>4</sup>

**<sup>1</sup>H NMR (400 MHz, CDCl<sub>3</sub>):** δ = 9.04 (d, J = 7.8, 1 H), 8.37 (d, J = 4.7 Hz, 1 H), 8.19 (d, J = 8.4, Hz, 1 H), 7.51 (d, J = 8.0 Hz, 1 H), 7.36 – 7.27 (m, 2 H), 2.96 – 2.90 (m, 1 H), 2.58 – 2.51 (m, 2 H), 2.42 (s, 3 H), 1.13 (d, J = 6.7 Hz, 3 H).

**4b) Stoichiometric trial of Int-A with various Allenes for dienylation of sp<sup>3</sup> C-H bond.**

| Entry | Allene     | Solvent      | Temperature | Result                                           |
|-------|------------|--------------|-------------|--------------------------------------------------|
| 1.    | <b>I</b>   | 1, 4-Dioxane | 60-100 °C   | <i>n.r</i>                                       |
| 2.    | <b>II</b>  | 1, 4-Dioxane | 60-100 °C   | <i>Dimerization of allene II in trace amount</i> |
| 3.    | <b>III</b> | 1, 4-Dioxane | 60-100 °C   | <i>n.r</i>                                       |
| 4.    | <b>IV</b>  | 1, 4-Dioxane | 60-100 °C   | <i>Dimerization of IV in 20-40% was observed</i> |

|    |    |         |           |                                                  |
|----|----|---------|-----------|--------------------------------------------------|
| 5. | IV | Toluene | 60-100 °C | <i>Dimerization of IV in 30-60% was observed</i> |
|----|----|---------|-----------|--------------------------------------------------|

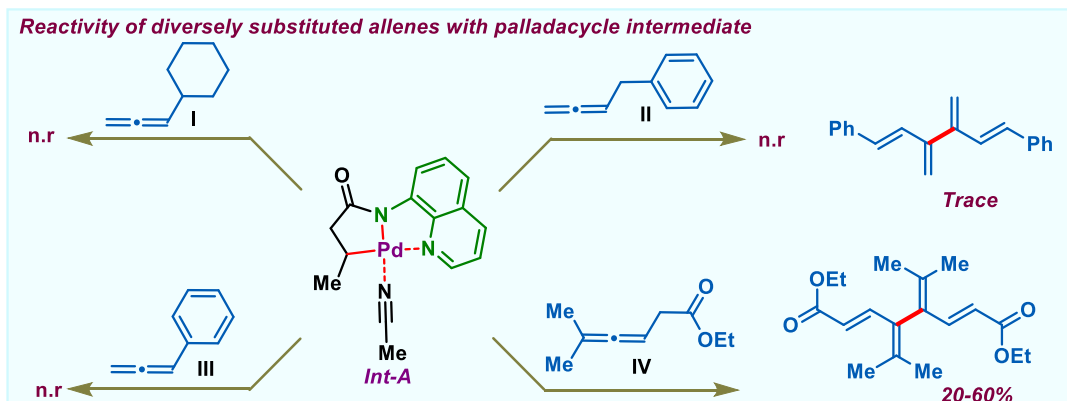

#### 4c) Stoichiometric trial of Int-A with various Allenes for dienylation of $sp^3$ C-H bond

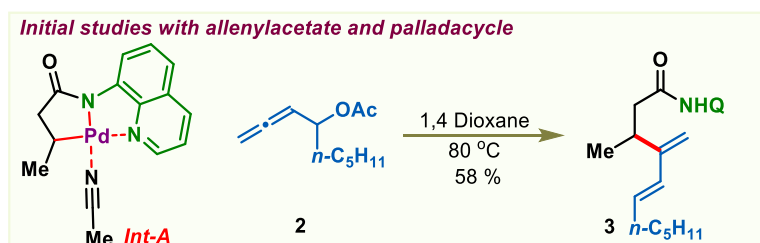

#### 4d) Catalytic Pd(II) catalyzed dienylation of $\beta$ - $sp^3$ C-H bond of 1 with allenyl acetate

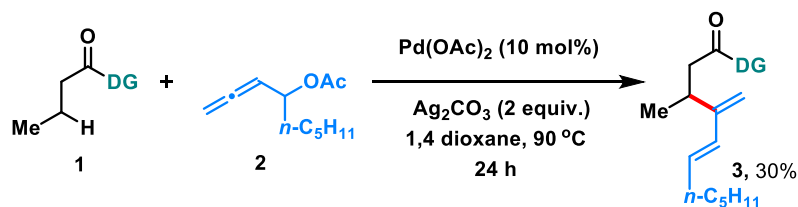

#### 4e) Screening of other directing group.

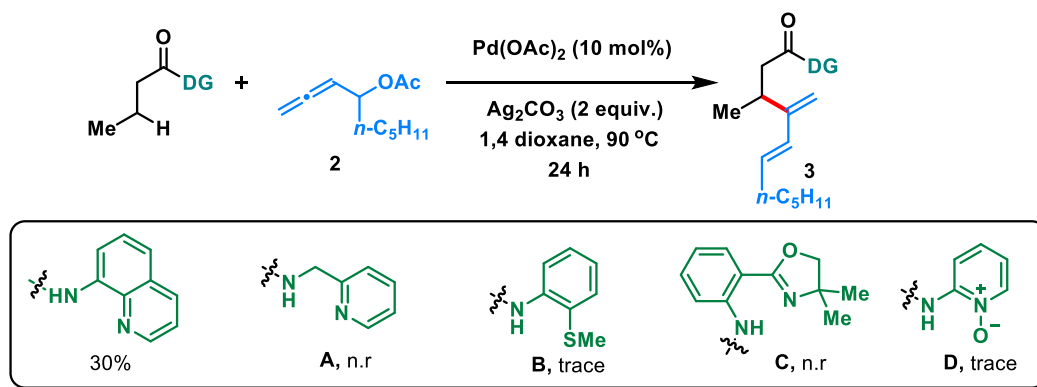

#### 4f) Optimization for Base

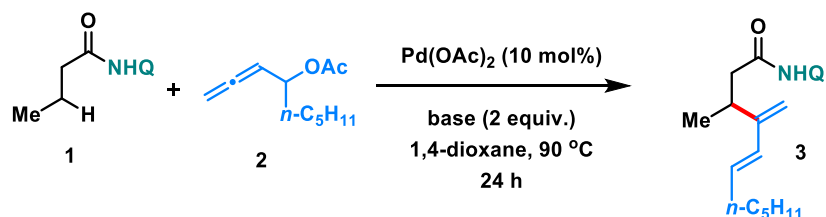

| Entry | Base                      | Yield <sup>1</sup>   |
|-------|---------------------------|----------------------|
| 1     | $\text{Ag}_2\text{CO}_3$  | 30                   |
| 2     | $\text{Cu}(\text{OAc})_2$ | 10                   |
| 3     | $\text{Na}_2\text{CO}_3$  | 65 (60) <sup>2</sup> |
| 4     | $\text{NaHCO}_3$          | 60                   |
| 5     | $\text{NaOPiv}$           | 15                   |
| 6     | $\text{NaOAc}$            | 29                   |
| 7     | $\text{K}_2\text{CO}_3$   | 55                   |
| 8     | $\text{KOAc}$             | 35                   |
| 9     | $\text{K}_3\text{PO}_4$   | 59                   |
| 10    | $\text{Cs}_2\text{CO}_3$  | 40                   |
| 11    | $\text{CsOAc}$            | 18                   |
| 12    | $\text{LiCl}$             | <5                   |
| 13    | $\text{NaOH}$             | -                    |
| 14    | DABCO                     | -                    |

Conditions: **1** (0.1mmol), **2** (0.15 mmol), <sup>1</sup>NMR yield (using 1,3,5-trimethoxybenzene as internal standard) <sup>2</sup>(Isolated Yield.)

#### 4g) Optimization for solvent.

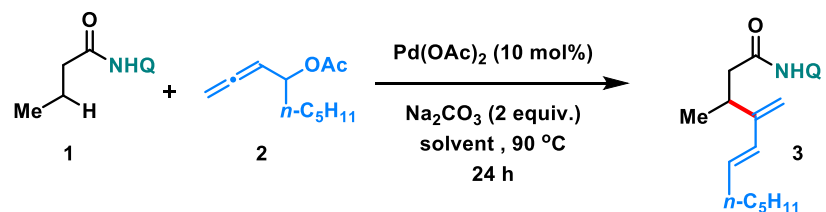

| S.N | solvents    | Yield <sup>1</sup>   |
|-----|-------------|----------------------|
| 1   | 1,4-dioxane | 65 (60) <sup>2</sup> |
| 2   | Toluene     | 64                   |

|    |               |    |
|----|---------------|----|
| 3  | DCE           | 40 |
| 4  | Acetonitrile  | 20 |
| 5  | t-Amyl-OH     | 49 |
| 6  | TFE           | 10 |
| 7  | HFIP          | 5  |
| 8  | DMF           | 30 |
| 9  | Acetone       | 10 |
| 10 | Xylene        | 49 |
| 11 | NMP           | 20 |
| 12 | DCM           | 23 |
| 13 | Chlorobenzene | 35 |
| 14 | Benzene       | 25 |
| 15 | chloroform    | 12 |
| 16 | t-BuOH        | 10 |
| 17 | EtOH          | 15 |

<sup>1</sup>(NMR yields.) <sup>2</sup>(Isolated Yield.)

#### 4h) Optimization with respect to Palladium Catalyst.

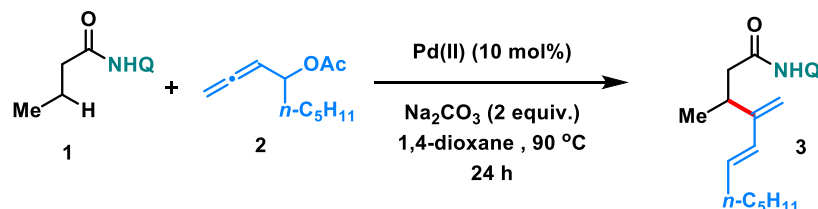

| Entry | Palladium Catalyst (10mol%)                         | Yield <sup>1</sup>  |
|-------|-----------------------------------------------------|---------------------|
| 2     | Pd(OAc) <sub>2</sub>                                | 65                  |
| 1     | Pd(OTf) <sub>2</sub>                                | 15 %                |
| 2     | Pd(THP) <sub>2</sub> Cl <sub>2</sub>                | 30%                 |
| 3     | Pd(acac) <sub>2</sub>                               | 45%                 |
| 4     | Pd(TFA) <sub>2</sub>                                | 60%                 |
| 5     | Pd(CH <sub>3</sub> CN) <sub>2</sub> Cl <sub>2</sub> | 55%                 |
| 6     | PdSO <sub>4</sub>                                   | Trace               |
| 7     | Pd(DMSO) <sub>2</sub> Cl <sub>2</sub>               | 35%                 |
| 8     | PdCl <sub>2</sub>                                   | 53                  |
| 9     | Pd(PivO) <sub>2</sub>                               | 69(65) <sup>2</sup> |

Conditions: **1** (0.1mmol), **2** (0.15 mmol), <sup>1</sup>NMR yield (using 1,3,5-trimethoxybenzene as internal standard) <sup>2</sup>(Isolated Yield.)

#### 4i) Ligand Optimization: mono-protected amino acids (MPAA).

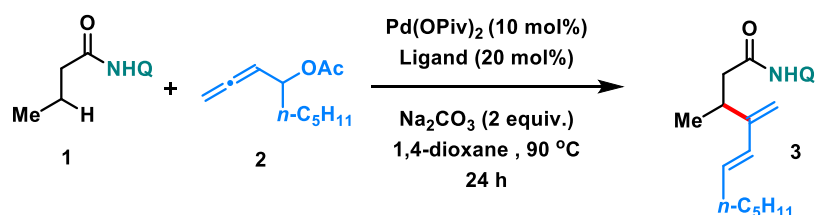

| Entry | Ligand                   | Yield <sup>1</sup>   |
|-------|--------------------------|----------------------|
| 1     | -                        | 69                   |
| 2     | Ac-Gly-OH                | 70                   |
| 3     | Fmoc-Gly-OH              | 62                   |
| 4     | Ac-Ala-OH                | 57                   |
| 5     | Ac-DL-Val-OH             | 25                   |
| 6     | Ac-Phe-OH                | 37                   |
| 7     | Ac-L-Leu-OH              | 47                   |
| 8     | N- $\alpha$ -Ac-L-Lys-OH | <5                   |
| 9     | Ac-4-hydroxy-L-Proline   | 10                   |
| 10    | Boc-Gly-OH               | 80 (78) <sup>2</sup> |
| 11    | Boc-Ala-OH               | 65                   |
| 12    | Boc-L-iso-Leu-OH         | 62                   |

Conditions: **1** (0.1mmol), **2** (0.15 mmol), <sup>1</sup>NMR yield (using 1,3,5-trimethoxybenzene as internal standard) <sup>2</sup>(Isolated Yield.)

#### Ligand Optimization: Nitrogen containing ligands.

| Entry | Ligand | Yield % <sup>1</sup> |
|-------|--------|----------------------|
| 1     | L1     | 15                   |
| 2     | L2     | 25                   |
| 3     | L3     | 17                   |
| 4     | L4     | 16                   |

|    |     |    |
|----|-----|----|
| 5  | L5  | 40 |
| 6  | L6  | 29 |
| 7  | L7  | 60 |
| 8  | L8  | 55 |
| 9  | L9  | 70 |
| 10 | L10 | 38 |
| 11 | L11 | 44 |
| 12 | L12 | 49 |
| 13 | L13 | 57 |
| 14 | L14 | 62 |
| 15 | L15 | 59 |

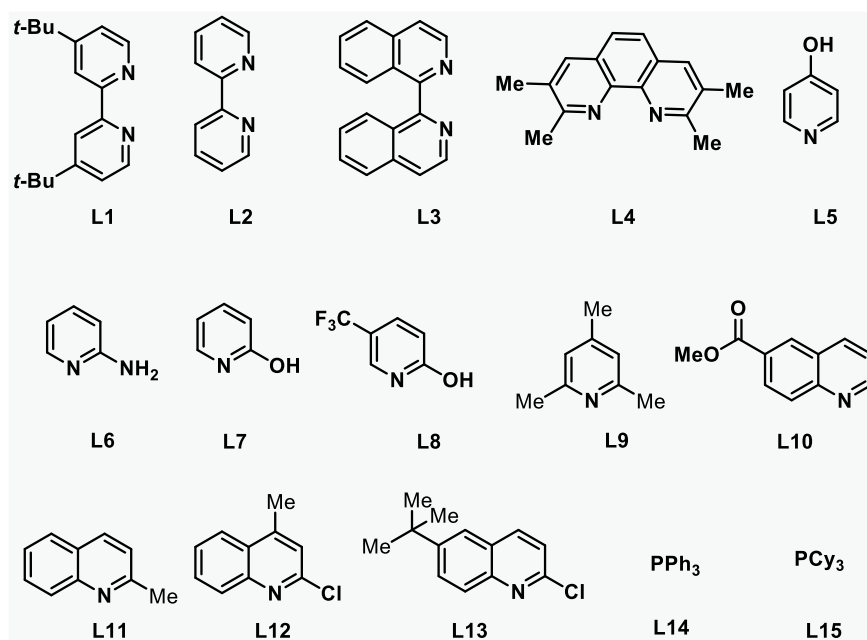

**Figure 1** Ligands screened for the reaction  
<sup>1</sup>(NMR yields.)

#### 4j) Leaving group Optimization.

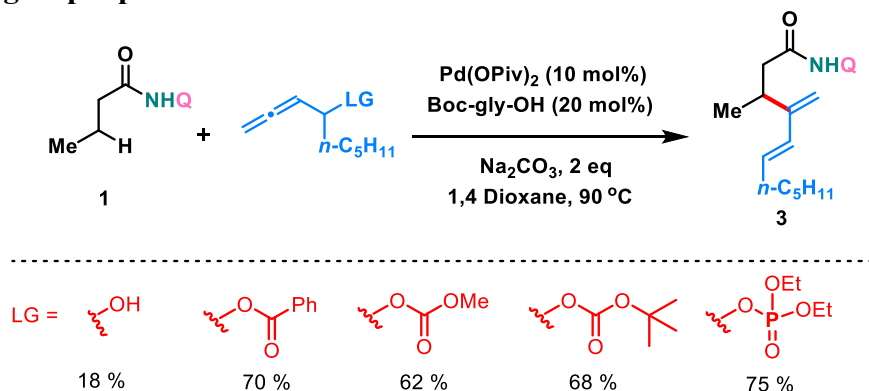

#### 5. Optimization for the cyclic carboxamide

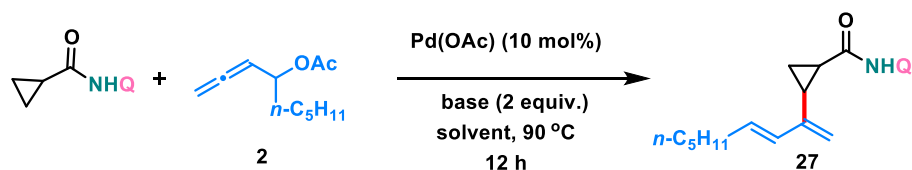

| entry | solvent     | base                            | ligand     | yield <sup>1</sup>  |
|-------|-------------|---------------------------------|------------|---------------------|
| 1     | 1,4-dioxane | Na <sub>2</sub> CO <sub>3</sub> | Boc-gly-OH | 70                  |
| 2     | 1,4-dioxane | Na <sub>2</sub> CO <sub>3</sub> | L12        | 50                  |
| 3     | 1,4-dioxane | Na <sub>2</sub> CO <sub>3</sub> | -          | 78                  |
| 4     | 1,4-dioxane | NaHCO <sub>3</sub>              | -          | 80                  |
| 5     | 1,4-dioxane | K <sub>2</sub> CO <sub>3</sub>  | -          | 65                  |
| 6     | 1,4-dioxane | KHCO <sub>3</sub>               | -          | 72                  |
| 7     | Toluene     | NaHCO <sub>3</sub>              | -          | 88(83) <sup>2</sup> |
| 8     | Toluene     | NaHCO <sub>3</sub>              | -          | 82 <sup>3</sup>     |
| 9     | DMF         | NaHCO <sub>3</sub>              | -          | 40                  |
| 10    | 1,2-DCE     | NaHCO <sub>3</sub>              | -          | 63                  |
| 11    | MeOH        | NaHCO <sub>3</sub>              | -          | 20                  |
| 12    | HFIP        | NaHCO <sub>3</sub>              | -          | 25                  |
| 13    | NMP         | NaHCO <sub>3</sub>              | -          | 47                  |

Conditions: **1** (0.1mmol), **2** (0.15 mmol), <sup>1</sup>NMR yield (using 1,3,5-trimethoxybenzene as internal standard) <sup>2</sup>(Isolated Yield.) <sup>3</sup>(1 equiv. NaHCO<sub>3</sub>)



## 6. General Procedure for the Pd(II)-Catalyzed $\text{sp}^3$ C-H dienylation with allenyl acetates:

### a. General Procedure for the $\beta$ C-H dienylation of Acyclic carboxamide

To an oven-dried screw-cap reaction tube equipped with a stir bar, were added amide (0.2 mmol), freshly prepared allenyl acetate (0.3 mmol),  $\text{Pd}(\text{OPiv})_2$  (10 mol%), Boc-gly-OH (20 mol%) and  $\text{Na}_2\text{CO}_3$  (0.4 mmol) followed by dry 1,4 Dioxane (2.0 mL). The reaction mixture was heated for 24 h at 90 °C. Upon completion as detected by TLC. The organic phase was evaporated under reduced pressure and the product was separated by using silica-gel column chromatography.

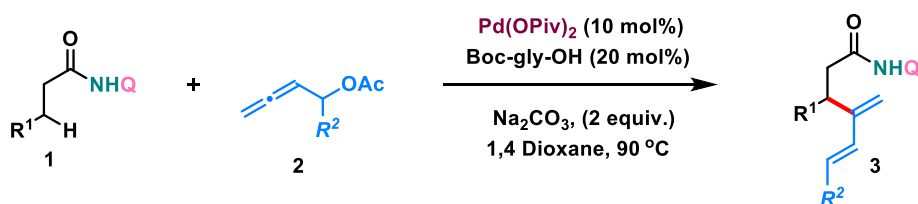

### b. General Procedure for the $\beta$ - $\text{sp}^3$ (C-H) dienylation of cyclic carboxamide

To an oven dried screw-cap reaction tube equipped with stir bar, were added amide (0.2 mmol), freshly prepared allenyl acetate (0.3 mmol),  $\text{Pd}(\text{OAc})_2$  (10 mol%) and  $\text{NaHCO}_3$  (0.2 mmol) followed by dry Toluene (2.0 mL). The reaction mixture was heated for 24 h at 90 °C. Upon completion as detected by TLC. The organic phase was evaporated under reduced pressure and the product was separated by using silica-gel column chromatography.

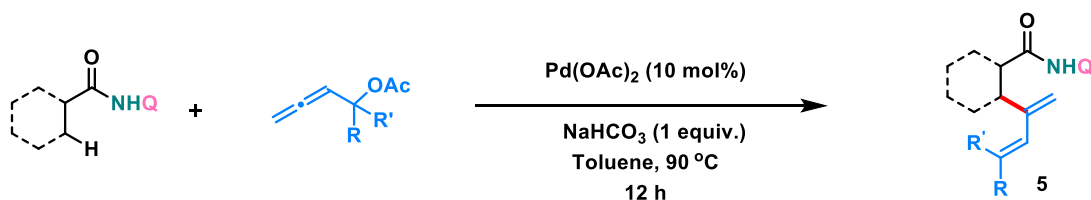

### c. General Procedure for the $\gamma$ C-H dienylation of Acyclic carboxamide

To an oven dried screw-cap reaction tube equipped with stir bar, were added amide (0.2 mmol), allenyl acetate (0.3 mmol),  $\text{Pd}(\text{OAc})_2$  (10 mol%) and  $\text{NaHCO}_3$  (0.4 mmol) followed by dry Toluene (2.0 mL). The reaction mixture was heated for 24 h at 100 °C. After completion of the reaction (detected by TLC) the organic phase was evaporated under reduced pressure and the product was separated by using silica-gel column chromatography.

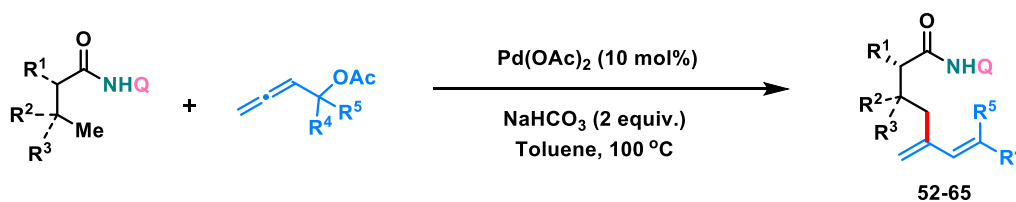

## 7. Spectroscopic data for new compounds.

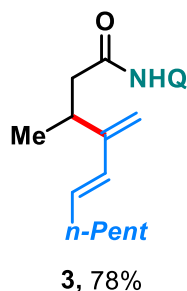

### (E)-3-methyl-4-methylene-N-(quinolin-8-yl)undec-5-enamide (3)

The title compound was prepared according to the general procedure as mentioned from *N*-(quinolin-8-yl)butyramide **S1** (0.20 mmol 43 mg). The crude product was purified via flash column chromatography (Hex/EtOAc) to afford a **3** Yellow liq. (52.5 mg, 78%).

$R_f$ : 0.25 (hexane/ethyl acetate, 9:1 v/v).

$^1\text{H NMR}$  (500 MHz,  $\text{CDCl}_3$ )  $\delta$  9.85 (s, 1H), 8.88 – 8.77 (m, 2H), 8.18 (d,  $J = 7.6$  Hz, 1H), 7.58 – 7.50 (m, 2H), 7.47 (dd,  $J = 8.2, 4.2$  Hz, 1H), 6.07 (d,  $J = 15.9$  Hz, 1H), 6.00 – 5.85 (m, 1H), 5.01 (s, 1H), 4.98 (s, 1H), 3.29 – 3.14 (m, 1H), 2.86 (dd,  $J = 14.5, 5.3$  Hz, 1H), 2.52 (dd,  $J = 14.5, 8.9$  Hz, 1H), 2.12 (dd,  $J = 14.3, 7.1$  Hz, 2H), 1.41 (dt,  $J = 14.4, 7.3$  Hz, 2H), 1.33 – 1.28 (m, 4H), 1.27 (d,  $J = 6.8$  Hz, 3H), 0.89 (t,  $J = 6.8$  Hz, 3H).

$^{13}\text{C NMR}$  (125 MHz,  $\text{CDCl}_3$ )  $\delta$  = 171.01, 150.57, 148.09, 138.32, 136.63, 134.60, 131.05, 130.89, 128.08, 127.61, 121.66, 121.52, 116.73, 111.41, 45.18, 33.10, 32.31, 31.59, 29.16, 22.64, 20.07, 14.16.

**HRMS (ESI)** calculated for  $[\text{C}_{22}\text{H}_{29}\text{N}_2\text{O}]^+$  ( $\text{M}+\text{H}$ ) $^+$   $m/z$ : 337.2274, found 337.2275.

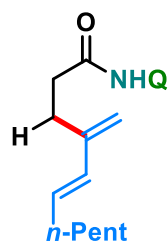

**4**, 65%

**(E)-4-methylene-N-(quinolin-8-yl)undec-5-enamide (4)**

According to the general procedure, the title compound was prepared as mentioned from *N*-(quinolin-8-yl)propionamide **S2** (0.20 mmol 40 mg). The crude product was purified via flash column chromatography (Hex/EtOAc) to afford a **4** light-Yellow liq. (42.0 mg, 65%).

*R<sub>f</sub>*: 0.26 (hexane/ethyl acetate, 9:1 v/v).

**<sup>1</sup>H NMR (400 MHz, CDCl<sub>3</sub>)** δ 9.85 (s, 1H), 8.82 – 8.77 (m, 2H), 8.17 (dd, *J* = 8.3, 1.6 Hz, 1H), 7.57 – 7.49 (m, 2H), 7.46 (dd, *J* = 8.3, 4.2 Hz, 1H), 6.10 (d, *J* = 15.9 Hz, 1H), 5.84 (dd, *J* = 14.8, 7.9 Hz, 1H), 4.96 (s, 2H), 2.81 – 2.70 (m, 4H), 2.11 (td, *J* = 7.9, 1.0 Hz, 2H), 1.45 – 1.37 (m, 2H), 1.33 – 1.26 (m, 4H), 0.89 (t, *J* = 7.0 Hz, 3H).

**<sup>13</sup>C NMR (100 MHz, CDCl<sub>3</sub>)** δ 171.44, 148.13, 144.98, 136.65, 134.62, 131.55, 131.12, 128.12, 127.65, 121.69, 121.55, 116.76, 113.75, 37.05, 32.99, 31.60, 29.19, 28.02, 22.67, 14.18.

**HRMS (ESI)** calculated for [C<sub>21</sub>H<sub>27</sub>N<sub>2</sub>O]<sup>+</sup> (*M*+*H*)<sup>+</sup> *m/z*: 323.2118; Found 323.2120.

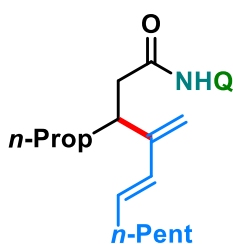

**5**, 68%

**(E)-4-methylene-3-propyl-N-(quinolin-8-yl)undec-5-enamide (5)**

According to the general procedure, the title compound was prepared as mentioned from *N*-(quinolin-8-yl)hexanamide **S3** (0.20 mmol 48.5 mg). The crude product was purified via flash column chromatography (Hex/EtOAc) to afford a **5** yellow liq. (49.6 mg, 68%).

*R<sub>f</sub>*: 0.25 (hexane/ethyl acetate, 9:1 v/v).

**<sup>1</sup>H NMR (400 MHz, CDCl<sub>3</sub>)** δ= 9.70 (s, 1H), 8.74 – 8.67 (m, 2H), 8.03 (dd, *J* = 8.3, 1.6 Hz, 1H), 7.45 – 7.35 (m, 2H), 7.33 (dd, *J* = 8.2, 4.2 Hz, 1H), 5.95 (d, *J* = 16.0 Hz, 1H), 5.85 (dt, *J*

= 15.7, 6.6 Hz, 1H), 4.96 (s, 1H), 4.85 (s, 1H), 3.00 (dd,  $J$  = 14.2, 7.1 Hz, 1H), 2.63 (dd,  $J$  = 14.5, 7.1 Hz, 1H), 2.53 (dd,  $J$  = 14.5, 7.3 Hz, 1H), 1.98 (dt,  $J$  = 13.9, 6.8 Hz, 2H), 1.49 (dd,  $J$  = 14.9, 7.7 Hz, 2H), 1.31 – 1.24 (m, 3H), 1.21 – 1.15 (m, 5H), 0.88 – 0.64 (m, 6H).

**$^{13}\text{C}$  NMR (100 MHz,  $\text{CDCl}_3$ )**  $\delta$  = 170.89, 148.78, 148.08, 138.42, 136.33, 134.67, 131.02, 130.99, 127.97, 127.46, 121.57, 121.35, 116.47, 112.20, 44.13, 38.18, 36.59, 33.05, 31.51, 29.07, 22.58, 20.39, 14.27, 14.12.

**HRMS (ESI):** calculated for  $[\text{C}_{24}\text{H}_{33}\text{N}_2\text{O}]^+ [\text{M}+\text{H}]^+ m/z$ : 365.2587, found 365.2585.

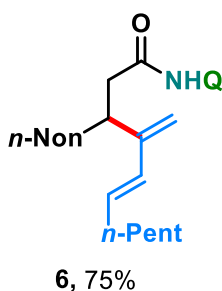

**(E)-3-(nona-1,3-dien-2-yl)-N-(quinolin-8-yl)dodecanamide (6)**

The title compound was prepared according to the general procedure as mentioned from N-(quinolin-8-yl)dodecanamide **S4** (0.10 mmol 32.6 mg). The crude product was purified via flash column chromatography (Hex/EtOAc) to afford a Yellow oily liq. **6** (33.6 mg, 75%).

**$R_f$ :** 0.27 (hexane/ethyl acetate, 9:1 v/v).

**$^1\text{H}$  NMR (500 MHz,  $\text{CDCl}_3$ )**  $\delta$  = 9.81 (s, 1H), 8.88 – 8.74 (m, 2H), 8.17 (dd,  $J$  = 8.3, 1.6 Hz, 1H), 7.56 – 7.49 (m, 2H), 7.46 (dd,  $J$  = 8.3, 4.2 Hz, 1H), 6.06 (d,  $J$  = 15.9 Hz, 1H), 5.96 (dt,  $J$  = 15.7, 6.7 Hz, 1H), 5.06 (s, 1H), 4.96 (s, 1H), 3.16 – 3.02 (m, 1H), 2.73 (dd,  $J$  = 14.5, 7.1 Hz, 1H), 2.64 (dd,  $J$  = 14.5, 7.3 Hz, 1H), 2.09 (ddd,  $J$  = 12.8, 7.9, 5.0 Hz, 2H), 2.05 (ddd,  $J$  = 12.2, 9.6, 5.6 Hz, 1H), 1.61 (dd,  $J$  = 14.6, 7.0 Hz, 2H), 1.32 – 1.23 (m, 20H), 0.91 – 0.86 (m, 7H).

**$^{13}\text{C}$  NMR (126 MHz,  $\text{CDCl}_3$ )**  $\delta$  = 170.98, 148.88, 148.13, 138.50, 136.41, 134.73, 131.10, 131.06, 128.05, 127.55, 121.63, 121.39, 116.55, 112.25, 44.19, 38.47, 34.39, 33.11, 32.01, 31.57, 29.86, 29.83, 29.70, 29.44, 29.14, 27.26, 22.79, 22.64, 14.23, 14.17.

**HRMS (ESI):** calculated for  $[\text{C}_{30}\text{H}_{45}\text{N}_2\text{O}]^+ [\text{M}+\text{H}]^+ m/z$ : 449.3526 and found: 449.3532.

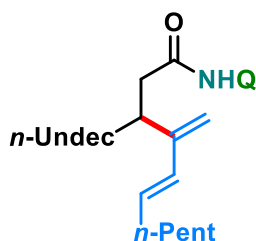

7, 70%

**(E)-3-(nona-1,3-dien-2-yl)-N-(quinolin-8-yl)tetradecanamide (7)**

According to the general procedure, the title compound was prepared as mentioned from N-(quinolin-8-yl)tetradecanamide **S5** (0.1 mmol 35.5 mg). The crude product was purified via flash column chromatography (Hex/EtOAc) to afford a light-Yellow oily liq. **7** (33.4 mg, 70%).

**R<sub>f</sub>**: 0.27 (hexane/ethyl acetate, 9:1 v/v).

**<sup>1</sup>H NMR (400 MHz, CDCl<sub>3</sub>)** δ= 9.70 (s, 1H), 8.78 – 8.66 (m, 2H), 8.05 (dd, *J* = 8.3, 1.6 Hz, 1H), 7.46 – 7.37 (m, 2H), 7.35 (dd, *J* = 8.3, 4.2 Hz, 1H), 5.96 (d, *J* = 15.8 Hz, 1H), 5.85 (dt, *J* = 15.7, 6.6 Hz, 1H), 4.96 (s, 1H), 4.85 (s, 1H), 3.07 – 2.90 (m, 1H), 2.63 (dd, *J* = 14.5, 7.1 Hz, 1H), 2.53 (dd, *J* = 14.5, 7.3 Hz, 1H), 2.00 (dd, *J* = 14.4, 7.2 Hz, 2H), 1.51 (dd, *J* = 14.3, 7.1 Hz, 2H), 1.33 – 1.25 (m, 3H), 1.21 – 1.13 (m, 21H), 0.82 – 0.76 (m, 6H).

**<sup>13</sup>C NMR (100 MHz, CDCl<sub>3</sub>)** δ= 169.95, 147.85, 147.11, 137.47, 135.38, 133.71, 130.07, 127.02, 126.52, 120.60, 120.37, 115.52, 111.24, 43.17, 37.43, 33.38, 32.10, 31.02, 30.55, 28.84, 28.77, 28.73, 28.68, 28.46, 28.13, 26.24, 21.80, 21.63, 13.23, 13.15.

**HRMS (ESI)**: calculated for [C<sub>32</sub>H<sub>49</sub>N<sub>2</sub>O]<sup>+</sup>[M+H]<sup>+</sup> *m/z*: 477.3839 and found: 477.3834.

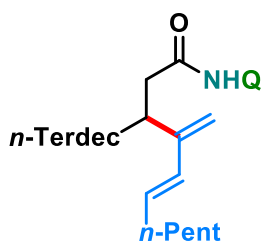

8, 60%

**(E)-3-(nona-1,3-dien-2-yl)-N-(quinolin-8-yl)hexadecanamide (8)**

According to the general procedure, the title compound was prepared as mentioned from N-(quinolin-8-yl)palmitamide **S6** (0.1 mmol 38 mg). The crude product was purified via flash column chromatography (Hex/EtOAc) to afford a sticky liq. **8** (30.3 mg, 60%).

**R<sub>f</sub>**: 0.27 (hexane/ethyl acetate, 9:1 v/v).

**<sup>1</sup>H NMR (400 MHz, CDCl<sub>3</sub>)** δ 9.78 (s, 1H), 8.82 – 8.72 (m, 2H), 8.15 (dd, *J* = 8.3, 1.7 Hz, 1H), 7.55 – 7.47 (m, , 2H), 7.44 (dd, *J* = 8.3, 4.2 Hz, 1H), 6.01 (d, 1H), 5.95 (dt, 1H), 5.04 (s, 1H), 4.93 (s, 1H), 3.14 – 2.96 (m, 1H), 2.69 (dd, *J* = 7.1 Hz, 1H), 2.63 (dd, *J* = 7.3 Hz, 1H), 2.11 – 2.05 (m, 2H), 2.03 – 1.99 (m, 1H), 1.62 – 1.56 (m, 4H), 1.27 – 1.22 (m, 22H), 0.89 – 0.85 (m, 6H).

**<sup>13</sup>C NMR (101 MHz, CDCl<sub>3</sub>)** δ 171.02, 148.93, 148.16, 138.55, 136.45, 134.78, 131.15, 131.07, 128.09, 127.60, 121.65, 121.42, 116.60, 112.26, 44.22, 38.56, 34.43, 33.13, 32.07, 31.60, 29.88, 29.84, 29.80, 29.77, 29.72, 29.50, 29.17, 27.29, 22.84, 22.66, 14.26, 14.18

**HRMS (ESI):** calculated for [C<sub>34</sub>H<sub>53</sub>N<sub>2</sub>O]<sup>+</sup>[M+H]<sup>+</sup> *m/z*: 505.4152; Found: 505.4156.

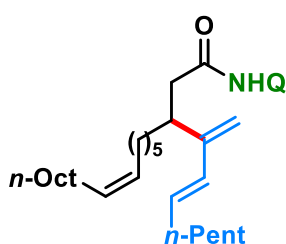

**9**, 50%

**(Z)-3-((E)-nona-1,3-dien-2-yl)-N-(quinolin-8-yl)heptadec-9-enamide (9)**

The title compound was prepared according to the general procedure as mentioned from (*Z*)-*N*-(quinolin-8-yl)octadec-9-enamide **S7** (0.1 mmol 40.8 mg). The crude product was purified via flash column chromatography (Hex/EtOAc) to afford a Yellow oily liq. **9** (26.5 mg, 50%).

**R<sub>f</sub>**: 0.24 (hexane/ethyl acetate, 9:1 v/v).

**<sup>1</sup>H NMR (400 MHz, CDCl<sub>3</sub>)** δ 9.78 (s, 1H), 8.84 – 8.69 (m, 2H), 8.15 (dd, *J* = 8.2, 1.2 Hz, 1H), 7.55 – 7.47 (m, 2H), 7.45 (dd, *J* = 8.2, 4.2 Hz, 1H), 6.03 (d, *J* = 15.8 Hz, 1H), 5.95 (s, 1H), 5.32 (td, *J* = 5.8, 3.5 Hz, 2H), 5.04 (s, 1H), 4.93 (s, 1H), 3.13 – 3.00 (m, 1H), 2.70 (dd, *J* = 7.1 Hz, 1H), 2.63 (dd, *J* = 7.3 Hz, 1H), 2.11 – 2.05 (m, 2H), 2.02 – 1.95 (m, 4H), 1.59 (d, *J* = 6.0 Hz, 2H), 1.32 – 1.24 (m, 26H), 0.89 – 0.86 (m, 6H).

**<sup>13</sup>C NMR (101 MHz, CDCl<sub>3</sub>)** δ 170.98, 148.85, 148.12, 138.46, 136.50, 134.71, 131.14, 131.05, 130.06, 129.91, 128.07, 127.60, 121.64, 121.43, 116.64, 112.28, 44.18, 38.49, 34.38, 33.12, 32.03, 31.58, 29.90, 29.83, 29.80, 29.65, 29.53, 29.45, 29.15, 27.34, 27.30, 27.19, 22.81, 22.64, 14.24, 14.17.

**HRMS (ESI):** calculated for [C<sub>36</sub>H<sub>55</sub>N<sub>2</sub>O]<sup>+</sup> (M+H)<sup>+</sup> *m/z*: 531.4309 found: 531.4315.

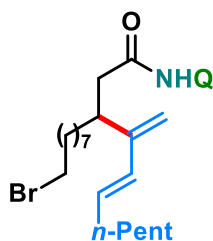

**10**, 70%

**(E)-3-(7-bromoheptyl)-4-methylene-N-(quinolin-8-yl)undec-5-enamide (10)**

According to the general procedure, the title compound was prepared as mentioned from 11-bromo-N-(quinolin-8-yl)undecanamide **S8** (0.10 mmol 39.2 mg). The crude product was purified via flash column chromatography (Hex/EtOAc) to afford a Yellow sticky liq. **10** (35.8 mg, 70%).

*R<sub>f</sub>*: 0.27 (ethyl acetate /hexane, 1: 9 v/v).

**<sup>1</sup>H NMR (500 MHz, CDCl<sub>3</sub>)** δ 9.81 (s, 1H), 8.84 – 8.78 (m, 2H), 8.17 (dd, *J* = 8.3, 1.5 Hz, 1H), 7.57 – 7.49 (m, 2H), 7.47 (dd, *J* = 8.2, 4.2 Hz, 1H), 6.06 (d, *J* = 15.8 Hz, 1H), 5.95 (dt, *J* = 15.7, 6.7 Hz, 1H), 5.06 (s, 1H), 4.95 (s, 1H), 3.40 (t, 2H), 3.13 – 3.04 (m, 1H), 2.74 (dd, *J* = 14.5, 7.0 Hz, 1H), 2.63 (dd, *J* = 14.5, 7.4 Hz, 1H), 2.10 (dd, *J* = 14.2, 7.0 Hz, 2H), 1.87 – 1.79 (m, 2H), 1.64 – 1.57 (m, 2H), 1.41 – 1.36 (m, 4H), 1.33 – 1.25 (m, 11H), 0.89 (t, 3H).

**<sup>13</sup>C NMR (125 MHz, CDCl<sub>3</sub>)** δ 170.96, 148.81, 148.15, 138.48, 136.43, 134.70, 131.12, 131.02, 128.04, 127.55, 121.65, 121.43, 116.54, 112.29, 44.18, 38.40, 34.28, 34.14, 33.10, 32.92, 31.56, 29.68, 29.42, 29.14, 28.80, 28.25, 27.16, 22.64, 14.18.

**HRMS (ESI)**:: C<sub>29</sub>H<sub>41</sub>BrN<sub>2</sub>NaO, [M+Na]<sup>+</sup>, Calculated= 535.2294; Found=535.2286

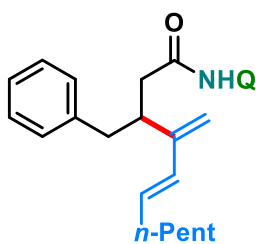

**11**, 64%

**(E)-3-benzyl-4-methylene-N-(quinolin-8-yl)undec-5-enamide(11)**

The title compound was prepared according to the general procedure as mentioned from 4-phenyl-N-(quinolin-8-yl)butanamide **S9** (0.10 mmol 29 mg). The crude product was purified via flash column chromatography (Hex/EtOAc) to afford a yellow sticky solid **11** (26.4 mg, 64%).

*R<sub>f</sub>*: 0.23 (ethyl acetate /hexane, 1: 9 v/v).

**<sup>1</sup>H NMR (400 MHz, CDCl<sub>3</sub>)** δ = 9.77 (s, 1H), 8.80 (dd, *J*=4.2, 1.7, 1H), 8.75 (dd, *J*=7.1, 1.8, 1H), 8.15 (dd, *J*=8.3, 1.7, 1H), 7.55 – 7.47 (m, 2H), 7.44 (dd, *J*=8.3, 4.2, 1H), 7.28 – 7.21 (m, 4H), 7.20 – 7.13 (m, 1H), 6.06 (d, *J*=16.2, 1H), 5.96 (dt, *J*=15.8, 6.6, 1H), 5.04 (s, 1H), 4.91 (s, *J*=14.1, 1H), 3.45 (p, *J*=7.1, 1H), 2.97 (dd, *J*=13.7, 6.9, 1H), 2.86 (dd, *J*=13.7, 7.3, 1H), 2.78 – 2.64 (m, 2H), 2.14 – 2.05 (m, 2H), 1.43 – 1.33 (m, 2H), 1.32 – 1.25 (m, 4H), 0.88 (t, *J*=6.9, 3H).

**<sup>13</sup>C NMR (100 MHz, CDCl<sub>3</sub>)** δ 170.56, 148.11, 148.08, 139.92, 138.42, 136.45, 134.62, 131.15, 131.07, 129.47, 128.23, 128.02, 127.53, 126.16, 121.63, 121.43, 116.60, 112.94, 42.34, 40.57, 39.46, 33.10, 31.57, 29.12, 22.64, 14.17.

**HRMS (ESI):** calculated for [C<sub>28</sub>H<sub>32</sub>N<sub>2</sub>NaO]<sup>+</sup> (M+Na)<sup>+</sup> *m/z*: 435.2407, found: 435.2422.

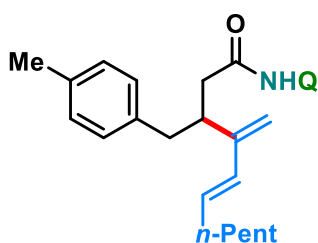

**12, 68%**

**(E)-3-(4-methylbenzyl)-4-methylene-N-(quinolin-8-yl)undec-5-enamide (12)**

The title compound was prepared according to the general procedure as mentioned from *N*-(quinolin-8-yl)-4-(p-tolyl)butanamide **S10** (0.10 mmol 30.4 mg). The crude product was purified via flash column chromatography (Hex/EtOAc) to afford a light-Yellow sticky liq. of **12** (29.0 mg, 68%).

**R<sub>f</sub>**: 0.24 (ethyl acetate /hexane, 1: 9 v/v).

**<sup>1</sup>H NMR (500 MHz, CDCl<sub>3</sub>)** δ = 9.77 (s, 1H), 8.82 (d, *J*=3.7, 1H), 8.75 (m, 1H), 8.17 (d, *J*=8.2, 1H), 7.57 – 7.43 (m, 3H), 7.14 (d, *J*=7.7, 2H), 7.07 (d, *J*=7.7, 2H), 6.08 (d, *J*=15.9, 1H), 6.03 – 5.95 (m, 1H), 5.06 (s, 1H), 4.93 (s, 1H), 3.49 – 3.38 (m, 1H), 2.96 (dd, *J*=13.7, 6.8, 1H), 2.83 (dd, *J*=13.7, 7.4, 1H), 2.78 – 2.67 (m, 2H), 2.40 – 2.34 (m, 1H), 2.28 (s, 3H), 2.14 – 2.09 (m, 2H), 1.42 – 1.38 (m, 2H), 1.36 – 1.24 (m, 3H), 0.90 (t, *J*=6.8, 3H).

**<sup>13</sup>C NMR (125 MHz, CDCl<sub>3</sub>)** δ 170.67, 148.22, 148.10, 138.43, 136.78, 136.44, 135.58, 134.65, 131.11, 129.34, 128.94, 128.03, 127.53, 121.62, 121.40, 116.59, 112.85, 42.38, 40.17, 39.52, 33.12, 31.59, 29.14, 22.65, 21.09, 14.17.

**HRMS (ESI):** calculated for [C<sub>29</sub>H<sub>35</sub>N<sub>2</sub>O]<sup>+</sup> (M+H)<sup>+</sup> *m/z*: 427.2744, found: 427.2740.



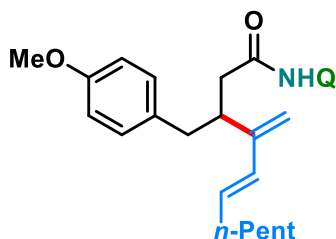

**13, 70%**

**(E)-3-(4-methoxybenzyl)-4-methylene-N-(quinolin-8-yl)undec-5-enamide (13)**

The title compound was prepared according to the general procedure as mentioned from 4-(4-methoxyphenyl)-N-(quinolin-8-yl)butanamide **S11** (0.10 mmol 32.0 mg). The crude product was purified via flash column chromatography (Hex/EtOAc) to afford a Yellow oily liq. **13** (31.0 mg, 70%).

**R<sub>f</sub>**: 0.22 (ethyl acetate /hexane, 1: 9 v/v).

**<sup>1</sup>H NMR (400 MHz, CDCl<sub>3</sub>)**  $\delta$  = 9.75 (s, 1H), 8.79 (dd, *J*=4.2, 1.6, 1H), 8.74 (dd, *J*=7.0, 1.9, 1H), 8.16 (d, *J*=8.2, 1H), 7.50 (dd, *J*=12.8, 5.3, 2H), 7.45 (dd, *J*=8.2, 4.2, 1H), 7.15 – 7.11 (m, 2H), 6.80 – 6.74 (m, 2H), 6.08 – 5.89 (m, 2H), 5.03 (s, 1H), 4.89 (s, 1H), 3.72 (s, 3H), 3.43 – 3.35 (m, 1H), 2.91 (dd, *J*=13.8, 6.8, 1H), 2.78 (dd, *J*=13.8, 7.3, 1H), 2.11 – 2.02 (m, 4H), 1.30 – 1.26 (m, 6H), 0.87 (t, *J*=6.9, 3H).

**<sup>13</sup>C NMR (100 MHz, CDCl<sub>3</sub>)**  $\delta$  170.71, 158.04, 148.21, 148.03, 134.60, 131.97, 131.13, 130.41, 128.07, 127.60, 121.63, 121.43, 113.65, 112.91, 55.27, 42.34, 39.68, 33.13, 31.60, 29.15, 22.65, 14.18.

**HRMS (ESI)**: calculated for [C<sub>29</sub>H<sub>35</sub>N<sub>2</sub>O<sub>2</sub>]<sup>+</sup> (M+H)<sup>+</sup> *m/z*: 443.2693, found: 443.2687.

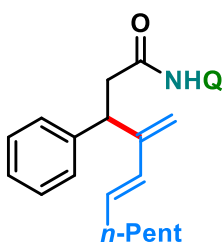

**14, 64%**

**(E)-4-methylene-3-phenyl-N-(quinolin-8-yl)undec-5-enamide(14)**

The title compound was prepared according to the general procedure as mentioned from 3-phenyl-N-(quinolin-8-yl)propanamide **S12** (0.10 mmol 27.6 mg). The crude product was purified via flash column chromatography (Hex/EtOAc) to afford a yellow liq. **14** (25.5 mg, 64%).

**R<sub>f</sub>**: 0.26 (ethyl acetate /hexane, 1: 9 v/v).

**<sup>1</sup>H NMR (400 MHz, CDCl<sub>3</sub>)** δ = 9.77 (s, 1H), 8.79 – 8.71 (m, 2H), 8.15 (d, *J*=8.3, 1H), 7.54 – 7.46 (m, 2H), 7.44 (dd, *J*=8.2, 4.3, 1H), 7.35 (d, *J*=7.3, 2H), 7.26 (t, *J*=7.6, 2H), 7.15 (dd, *J*=11.5, 4.3, 1H), 6.01 (d, *J*=15.9, 1H), 5.83 (dt, *J*=15.7, 6.8, 1H), 5.14 (d, *J*=28.2, 2H), 4.43 (t, *J*=7.6, 1H), 3.15 (dd, *J*=14.9, 7.3, 1H), 3.01 (dd, *J*=14.9, 7.9, 1H), 2.10 – 1.98 (m, 2H), 1.31 – 1.20 (m, 4H), 1.14 (ddd, *J*=13.7, 7.6, 4.4, 2H), 0.83 (t, *J*=7.2, 3H).

**<sup>13</sup>C NMR (100 MHz, CDCl<sub>3</sub>)** δ = 170.11, 147.90, 147.82, 142.86, 134.41, 132.36, 131.05, 128.59, 128.53, 128.08, 127.98, 127.86, 127.66, 126.60, 121.60, 121.57, 117.01, 113.15, 44.05, 43.86, 32.99, 31.39, 28.99, 22.60, 14.13.

**HRMS (ESI):** calculated for [C<sub>27</sub>H<sub>31</sub>N<sub>2</sub>O]<sup>+</sup> (*M*+*H*)<sup>+</sup> *m/z*: 399.2431, found: 399.2437.

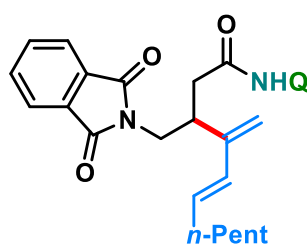

**(*E*)-3-((1,3-dioxoisindolin-2-yl)methyl)-4-methylene-*N*-(quinolin-8-yl)undec-5-enamide**  
**(15)**

The title compound was prepared according to the general procedure as mentioned from 4-(1,3-dioxoisindolin-2-yl)-*N*-(quinolin-8-yl)butanamide **S13** (0.1 mmol 35.9 mg). The crude product was purified via flash column chromatography (Hex/EtOAc) to afford a sticky solid **15** (26.4 mg, 55%).

***R<sub>f</sub>***: 0.15 (ethyl acetate /hexane, 1: 9 v/v).

**<sup>1</sup>H NMR (400 MHz, CDCl<sub>3</sub>)** δ = 9.75 (s, 1H), 8.82 (dd, *J* = 4.2, 1.7 Hz, 1H), 8.41 (dd, *J* = 7.7, 1.2 Hz, 1H), 8.12 (dd, *J* = 8.3, 1.6 Hz, 1H), 7.60 (dd, *J* = 5.5, 3.0 Hz, 2H), 7.50 (dd, *J* = 5.4, 3.1 Hz, 2H), 7.44 (dd, *J* = 8.2, 4.2 Hz, 1H), 7.39 (dd, *J* = 8.3, 1.2 Hz, 1H), 7.32 (d, *J* = 7.9 Hz, 1H), 6.23 – 6.12 (m, 1H), 6.09 (d, 1H), 5.10 (s, 1H), 5.07 (s, 1H), 3.89 – 3.80 (m, 2H), 2.78 (dd, *J* = 7.0 Hz, 2H), 2.13 – 2.06 (m, 2H), 1.29 – 1.25 (m, 5H), 0.87 – 0.85 (m, 3H).

**<sup>13</sup>C NMR (100 MHz, CDCl<sub>3</sub>)** δ = 169.75, 168.64, 148.23, 146.55, 138.38, 136.29, 134.43, 133.74, 132.08, 132.00, 130.72, 127.89, 127.37, 123.11, 121.66, 121.31, 116.31, 113.46, 42.49, 41.09, 36.18, 33.18, 31.64, 29.07, 22.64, 14.24.

**HRMS (ESI):** calculated for [C<sub>30</sub>H<sub>32</sub>N<sub>3</sub>O<sub>3</sub>]<sup>+</sup> (*M*+*H*)<sup>+</sup> *m/z*: 482.2438, found: 482.2434.

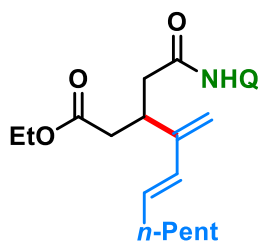

**16**, 72%

**ethyl (*E*)-4-methylene-3-(2-oxo-2-(quinolin-8-ylamino)ethyl)undec-5-enoate (16)**

According to the general procedure, the title compound was prepared as mentioned from ethyl 5-oxo-5-(quinolin-8-ylamino)pentanoate **S14** (0.1 mmol 28.6 mg). The crude product was purified *via* flash column chromatography (Hex/EtOAc) to afford a light-yellow liq. **16** (29.4 mg, 72%).

***R<sub>f</sub>***: 0.20 (ethyl acetate /hexane, 1: 9 v/v).

**<sup>1</sup>H NMR (400 MHz, CDCl<sub>3</sub>)** δ= 9.82 (s, 1H), 8.79 (dd, *J* = 4.2, 1.7 Hz, 1H), 8.76 (dd, *J* = 7.0, 2.0 Hz, 1H), 8.15 (dd, *J* = 8.3, 1.6 Hz, 1H), 7.55 – 7.47 (m, 2H), 7.44 (dd, *J* = 8.3, 4.2 Hz, 1H), 6.04 (d, *J* = 16.0 Hz, 1H), 5.98 (dt, *J* = 6.3 Hz, 1H), 5.04 (s, 1H), 4.97 (s, 1H), 4.10 (q, *J* = 7.1 Hz, 2H), 3.64 – 3.53 (m, 1H), 2.81 (dd, *J* = 14.7, 6.5 Hz, 1H), 2.74 (dd, *J* = 13.9, 6.8 Hz, 1H), 2.71 – 2.63 (m, 2H), 2.13 – 2.05 (m, 2H), 1.42 – 1.34 (m, 2H), 1.29 – 1.24 (m, 4H), 1.21 (t, *J* = 7.1 Hz, 3H), 0.86 (t, *J* = 8.9, 5.0 Hz, 3H).

**<sup>13</sup>C NMR (100 MHz, CDCl<sub>3</sub>)** δ= 172.16, 170.02, 148.22, 147.72, 138.49, 136.44, 134.61, 131.46, 130.63, 128.05, 127.52, 121.69, 121.56, 116.60, 112.66, 60.53, 42.70, 38.87, 34.47, 33.09, 31.59, 29.07, 22.63, 14.31, 14.15.

**HRMS (ESI)**: calculated for [C<sub>25</sub>H<sub>33</sub>N<sub>2</sub>O<sub>3</sub>]<sup>+</sup> (M+H)<sup>+</sup> *m/z*: 409.2486, found: 409.2492.

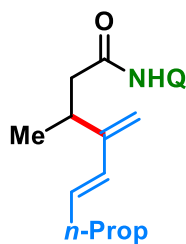

**17**, 70%

**(*E*)-3-methyl-4-methylene-*N*-(quinolin-8-yl)non-5-enamide (18)**

The title compound was prepared according to the general procedure as mentioned from *N*-(quinolin-8-yl)butyramide **S1** (0.10 mmol 21.5 mg). The crude product was purified via flash column chromatography (Hex/EtOAc) to afford a yellow oily liq. **17** (21.6 mg, 70%).

***R<sub>f</sub>***: 0.27 (ethyl acetate /hexane, 1: 9 v/v).

**<sup>1</sup>H NMR (400 MHz, CDCl<sub>3</sub>)** δ= 9.81 (s, 1H), 8.82 – 8.76 (m, 2H), 8.15 (dd, *J* = 8.3, 1.6 Hz, 1H), 7.56 – 7.47 (m, 2H), 7.44 (dd, *J* = 8.3, 4.2 Hz, 1H), 6.06 (d, *J* = 16.0 Hz, 1H), 5.93 (dt, *J* = 15.8, 6.7 Hz, 1H), 4.99 (s, 1H), 4.95 (s, 1H), 3.20 (dd, *J* = 14.9, 6.4 Hz, 1H), 2.83 (dd, *J* = 14.5, 5.3 Hz, 1H), 2.49 (dd, *J* = 14.5, 8.9 Hz, 1H), 2.13 – 2.05 (m, 2H), 1.49 – 1.37 (m, 2H), 1.25 (d, *J* = 6.8 Hz, 4H), 0.90 (t, *J* = 7.4 Hz, 4H).

**<sup>13</sup>C NMR (100 MHz, CDCl<sub>3</sub>)** δ= 170.98, 150.56, 148.21, 138.49, 136.46, 134.68, 131.27, 130.63, 128.06, 127.55, 121.68, 121.50, 116.57, 111.45, 45.20, 35.18, 32.37, 22.63, 20.05, 13.86.

**HRMS (ESI):** calculated for [C<sub>20</sub>H<sub>25</sub>N<sub>2</sub>O]<sup>+</sup> (*M*+H)<sup>+</sup> *m/z*: 309.1961, found: 309.1962.

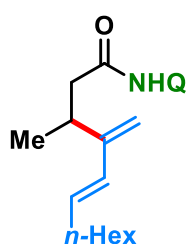

**18**, 74%

**(*E*)-3-methyl-4-methylene-*N*-(quinolin-8-yl)dodec-5-enamide (18)**

The title compound was prepared according to the general procedure as mentioned from *N*-(quinolin-8-yl)butyramide **S2** (0.20 mmol 43 mg). The crude product was purified via flash column chromatography (Hex/EtOAc) to afford a yellow oily liq. of **18** (51.8 mg, 74%).

***R*<sub>f</sub>**: 0.28 (ethyl acetate /hexane, 1: 9 v/v).

**<sup>1</sup>H NMR (500 MHz, CDCl<sub>3</sub>)** δ= 9.84 (s, 1H), 8.82 (dd, *J* = 4.5, 1.3 Hz, 2H), 8.18 (dd, *J* = 8.2, 1.1 Hz, 1H), 7.60 – 7.50 (m, 2H), 7.47 (dd, *J* = 8.2, 4.2 Hz, 1H), 6.08 (d, *J* = 15.9 Hz, 1H), 6.01 – 5.90 (m, 1H), 3.23 (dd, *J* = 14.3, 6.7 Hz, 1H), 2.86 (dd, *J* = 14.5, 5.3 Hz, 1H), 2.52 (dd, *J* = 14.5, 8.9 Hz, 1H), 2.16 – 2.09 (m, 2H), 1.45 – 1.37 (m, 2H), 1.32 – 1.26 (m, 9H), 0.89 (t, *J* = 6.8 Hz, 3H).

**<sup>13</sup>C NMR (125 MHz, CDCl<sub>3</sub>)** δ= 171.00, 150.58, 148.16, 138.42, 136.53, 134.65, 131.05, 130.91, 128.07, 127.58, 121.67, 121.51, 116.63, 111.39, 45.20, 33.14, 32.33, 31.84, 29.45, 29.05, 22.71, 20.07, 14.21.

**HRMS (ESI):** calculated for [C<sub>23</sub>H<sub>31</sub>N<sub>2</sub>O]<sup>+</sup> (*M*+H)<sup>+</sup> *m/z*: 351.2431, found: 351.2437.

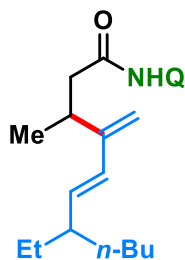

**19**, 54% dr 1:1

**(E)-7-ethyl-3-methyl-4-methylene-N-(quinolin-8-yl)undec-5-enamide (19, dr 1:1)**

The title compound was prepared according to the general procedure as mentioned from *N*-(quinolin-8-yl)butyramide **S1** (0.20 mmol 43 mg). The crude product was purified via flash column chromatography (Hex/EtOAc) to afford a oily liq. **19** (dr 1:1) (39.4 mg, 54%).

**R<sub>f</sub>**: 0.28 (ethyl acetate /hexane, 1: 9 v/v).

**<sup>1</sup>H NMR (500 MHz, CDCl<sub>3</sub>)** δ 9.84 (s, 1H), 8.82 (d, *J* = 7.6 Hz, 2H), 8.18 (dd, *J* = 8.2, 1.5 Hz, 1H), 7.64 – 7.40 (m, 2H), 6.03 (d, *J* = 15.9 Hz, 1H), 5.67 (dd, *J* = 15.8, 9.0 Hz, 1H), 5.02 (s, 1H), 4.98 (s, 1H) 3.32 – 3.11 (m, 1H), 2.87 (dd, *J* = 14.4, 5.1 Hz, 1H), 2.51 (ddd, *J* = 14.3, 9.2, 3.1 Hz, 1H), 1.92 (dt, *J* = 12.5, 4.0 Hz, 1H), 1.75 – 1.69 (m, 1H), 1.50 – 1.41 (m, 2H), 1.29 – 1.25 (m, 6H), 1.14 – 1.04 (m, 2H), 0.90 – 0.82 (m, 6H).

**<sup>13</sup>C NMR (125 MHz, CDCl<sub>3</sub>)** δ 170.90, 150.49, 150.45, 148.09, 138.36, 136.34, 135.18, 134.56, 130.85, 127.94, 127.44, 121.57, 121.39, 116.44, 111.24, 45.17, 45.15, 45.09, 45.05, 42.40, 34.80, 32.24, 29.65, 28.18, 28.15, 22.83, 22.80, 19.96, 19.88, 14.10, 14.08, 11.91, 11.89.

**HRMS (ESI)**: calculated for [C<sub>24</sub>H<sub>32</sub>N<sub>2</sub>ONa]<sup>+</sup> (M+Na)<sup>+</sup> m/z: 387.2407, found: 387.2401.

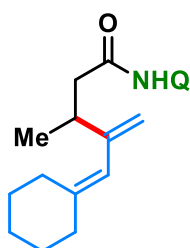

**20**, 48%

**4-(cyclohexylidenemethyl)-3-methyl-N-(quinolin-8-yl)pent-4-enamide (20)**

The title compound was prepared according to the general procedure as mentioned from *N*-(quinolin-8-yl)butyramide **S1** (0.20 mmol 43 mg). The crude product was purified via flash column chromatography (Hex/EtOAc) to afford a yellow liq. **20** (32.1 mg, 48%).

**Physical appearance** = Yellow oily liq.

**R<sub>f</sub>**: 0.27 (ethyl acetate /hexane, 1: 9 v/v).

**<sup>1</sup>H NMR (500 MHz, CDCl<sub>3</sub>)** δ = 9.81 (s, 1H), 8.80 (dd, *J*=4.3, 2.7, 2H), 8.17 (d, *J*=8.2, 1H), 7.56 – 7.48 (m, 2H), 7.46 (dd, *J*=8.2, 4.2, 1H), 5.67 (s, 1H), 5.09 (s, 1H), 4.76 (s, 1H), 2.97 – 2.88 (m, 1H), 2.72 (dd, *J*=14.5, 6.6, 1H), 2.46 (dd, *J*=14.5, 8.1, 1H), 2.26 (dtd, *J*=19.3, 13.1, 6.4, 2H), 2.15 (t, *J*=5.7, 4H), 1.54 (ddd, *J*=16.7, 10.1, 4.9, 4H), 1.42 (dd, *J*=11.6, 5.4, 2H), 1.18 (d, *J*=6.9, 3H).

**<sup>13</sup>C NMR (125 MHz, CDCl<sub>3</sub>)** δ = 171.07, 149.12, 148.05, 144.43, 136.72, 134.64, 128.12, 127.68, 121.65, 121.50, 121.00, 116.83, 112.04, 44.55, 38.05, 37.75, 29.92, 28.89, 28.25, 26.92, 19.64.

**HRMS (ESI)**: calculated for [C<sub>22</sub>H<sub>27</sub>N<sub>2</sub>O]<sup>+</sup> (M+H)<sup>+</sup> *m/z*: 335.2118, found: 335.2114.

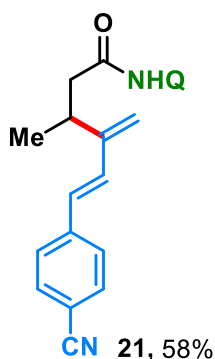

**(E)-6-(4-cyanophenyl)-3-methyl-4-methylene-N-(quinolin-8-yl)hex-5-enamide (21)**

The title compound was prepared according to the general procedure as mentioned from *N*-(quinolin-8-yl)butyramide **S1** (0.20 mmol 43 mg). The crude product was purified via flash column chromatography (Hex/EtOAc) to afford a light-yellow sticky solid **21** (42.6 mg, 58%).

**R<sub>f</sub>**: 0.19 (hexane /ethyl acetate, 9:1 v/v).

**<sup>1</sup>H NMR (500 MHz, CDCl<sub>3</sub>)** δ = 9.86 (s, 1H), 8.84 – 8.77 (m, 2H), 8.18 (dd, *J*=8.2, 1.3, 1H), 7.59 (d, *J*=8.2, 2H), 7.56 – 7.51 (m, 2H), 7.50 (d, *J*=8.3, 2H), 7.48 – 7.46 (m, 1H), 6.92 (d, *J*=16.4, 1H), 6.84 – 6.80 (m, 1H), 5.36 (s, 1H), 5.32 (s, 1H), 3.40 (dq, *J*=13.4, 6.7, 1H), 2.90 (dd, *J*=14.6, 5.6, 1H), 2.66 – 2.59 (m, 1H), 1.34 (d, *J*=6.8, 3H).

**<sup>13</sup>C NMR (125 MHz, CDCl<sub>3</sub>)** δ 170.50, 150.00, 148.25, 142.01, 138.40, 136.53, 134.47, 133.98, 132.46, 128.05, 127.52, 127.01, 126.57, 121.75, 121.70, 119.18, 116.77, 116.60, 110.53, 45.09, 31.80, 20.23.

**HRMS (ESI)**: calculated for [C<sub>24</sub>H<sub>22</sub>N<sub>3</sub>O]<sup>+</sup> (M+H)<sup>+</sup> *m/z*: 368.1757, found: 368.1755.

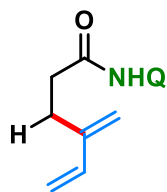

**22**, 52%

**4-methylene-N-(quinolin-8-yl)hex-5-enamide (22)**

The title compound was prepared according to the general procedure as mentioned from *N*-(quinolin-8-yl)propionamide **S2** (0.20 mmol 40 mg). The crude product was purified via flash column chromatography (Hex/EtOAc) to afford a yellow liq. **22** (54.0 mg, 52%).

**R<sub>f</sub>**: 0.25 (hexane /ethyl acetate, 9:1 v/v).

**<sup>1</sup>H NMR (400 MHz, CDCl<sub>3</sub>)** δ = 9.84 (s, 1H), 8.83 – 8.76 (m, 2H), 8.16 (dd, *J*=8.3, 1.6, 1H), 7.57 – 7.48 (m, 2H), 7.46 (dd, *J*=8.3, 4.2, 1H), 6.42 (dd, *J*=17.6, 10.9, 1H), 5.36 (d, *J*=17.7, 1H), 5.12 (t, *J*=11.5, 3H), 2.81 – 2.73 (m, 4H).

**<sup>13</sup>C NMR (100 MHz, CDCl<sub>3</sub>)** δ= 171.23, 148.19, 145.02, 138.53, 136.61, 134.59, 128.10, 127.61, 121.71, 121.58, 116.70, 116.47, 113.87, 36.77, 27.10.

**HRMS (ESI)**: calculated for [C<sub>16</sub>H<sub>17</sub>N<sub>2</sub>O]<sup>+</sup> (M+H)<sup>+</sup> *m/z*: 253.1335, found: 253.1331.

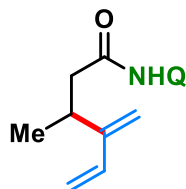

**23**, 58%

**4-methylene-3-propyl-N-(quinolin-8-yl)hex-5-enamide (23)**

The title compound was prepared according to the general procedure as mentioned from *N*-(quinolin-8-yl)hexanamide **S1** (0.20 mmol 48.5 mg). The crude product was purified via flash column chromatography (Hex/EtOAc) to afford a yellow liq. of **23** (34.1 mg, 58%).

**R<sub>f</sub>**: 0.27 (hexane /ethyl acetate, 9:1 v/v).

**<sup>1</sup>H NMR (400 MHz, CDCl<sub>3</sub>)** δ = 9.81 (s, 1H), 8.85 – 8.74 (m, 2H), 8.16 (dd, *J*=8.3, 1.5, 1H), 7.56 – 7.48 (m, 2H), 7.45 (dd, *J*=8.2, 4.2, 1H), 6.51 – 6.25 (m, 1H), 5.47 (d, *J*=17.7, 1H), 5.12 (t, *J*=9.5, 3H), 3.34 – 3.18 (m, 1H), 2.85 (dd, *J*=14.6, 5.3, 1H), 2.51 (dd, *J*=14.6, 8.9, 1H), 1.26 (d, *J*=6.8, 3H).

**<sup>13</sup>C NMR (100 MHz, CDCl<sub>3</sub>)** δ= 170.79, 150.70, 148.25, 138.51, 138.14, 136.49, 134.67, 128.09, 127.59, 121.71, 121.55, 116.61, 113.98, 113.85, 45.02, 31.56, 20.01.

**HRMS (ESI):** calculated for  $[C_{17}H_{19}N_2O]^+$  (M+H) $^+$  m/z: 267.1492, found: 267.1482.

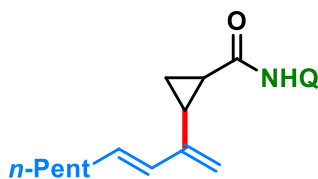

**27**, 83%

**2-((E)-nona-1,3-dien-2-yl)-N-(quinolin-8-yl)cyclopropane-1-carboxamide (27)**

The title compound was prepared according to the general procedure as mentioned from *N*-(quinolin-8-yl)cyclopropanecarboxamide **S18** (0.10 mmol 21.2 mg). The crude product was purified via flash column chromatography (Hex/EtOAc) to afford a light-yellow semi solid of **27** (27.8 mg, 83%).

*R<sub>f</sub>*: 0.24 (hexane /ethyl acetate, 9:1 v/v).

**<sup>1</sup>H NMR (500 MHz, CDCl<sub>3</sub>)**  $\delta$ = 9.90 (s, 1H), 8.81 (dd, *J* = 4.2, 1.5 Hz, 1H), 8.71 (dd, *J* = 7.3, 1.4 Hz, 1H), 8.15 (dd, *J* = 8.3, 1.5 Hz, 1H), 7.51 – 7.42 (m, 3H), 6.12 (d, *J* = 15.8 Hz, 1H), 6.07 – 5.97 (m, 1H), 5.17 (d, *J*=4.2, 2H), 2.29 – 2.20 (m, 1H), 2.14 (q, *J* = 8.5 Hz, 1H), 1.96 (dt, *J* = 14.0, 7.0 Hz, 1H), 1.87 (dt, *J* = 14.6, 7.5 Hz, 1H), 1.68 (dt, *J* = 7.3, 5.2 Hz, 1H), 1.28 (td, *J* = 8.2, 4.9 Hz, 1H), 1.16 – 1.08 (m, 1H), 1.07 – 0.93 (m, 3H), 0.93 – 0.79 (m, 2H), 0.59 (t, *J* = 7.2 Hz, 3H).

**<sup>13</sup>C NMR (125 MHz, CDCl<sub>3</sub>)**  $\delta$ = 168.71, 147.97, 141.39, 138.33, 136.40, 134.92, 132.03, 131.52, 128.03, 127.62, 121.53, 120.98, 116.52, 116.44, 32.91, 31.35, 28.99, 23.73, 23.57, 22.32, 13.90, 10.16.

**HRMS (ESI):** calculated for  $[C_{22}H_{27}N_2O]^+$  (M+H) $^+$  m/z: 335.2118, found: 335.2122.

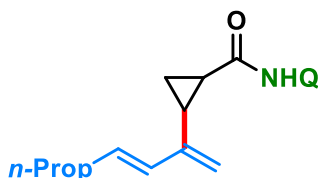

**28**, 58%

**(E)-2-(hepta-1,3-dien-2-yl)-N-(quinolin-8-yl)cyclopropanecarboxamide (28)**

The title compound was prepared according to the general procedure as mentioned from *N*-(quinolin-8-yl)cyclopropanecarboxamide **S18** (0.10 mmol 21.2 mg). The crude product was



purified via flash column chromatography (Hex/EtOAc) to afford a light-yellow liq. of **28** (23.9 mg, 78%).

**R<sub>f</sub>**: 0.24 (hexane /ethyl acetate, 9:1 v/v).

**<sup>1</sup>H NMR (500 MHz, CDCl<sub>3</sub>)** δ= 9.89 (s, 1H), 8.81 (s, 1H), 8.71 (d, *J* = 6.8 Hz, 1H), 8.14 (d, *J* = 7.8 Hz, 1H), 7.54 – 7.35 (m, 3H), 6.12 (d, *J* = 15.7 Hz, 1H), 6.08 – 5.98 (m, 1H), 5.17 (s, 2H), 2.24 (dd, *J* = 5.3 Hz, 1H), 2.14 (dd, *J* = 7.8 Hz, 1H), 1.96 (dd, *J* = 13.2, 6.5 Hz, 1H), 1.85 (dd, *J* = 13.7, 6.8 Hz, 1H), 1.68 (d, *J* = 4.9 Hz, 1H), 1.27 (d, *J* = 6.7 Hz, 1H), 1.23 – 1.06 (m, 2H), 0.58 (t, *J* = 6.9 Hz, 3H).

**<sup>13</sup>C NMR (125 MHz, CDCl<sub>3</sub>)** δ= 168.64, 147.91, 141.27, 138.31, 136.33, 134.90, 132.26, 131.15, 127.92, 127.54, 121.49, 120.93, 116.44, 116.40, 34.82, 23.65, 23.58, 22.31, 13.48, 10.09.

**HRMS (ESI)**: calculated for [C<sub>20</sub>H<sub>23</sub>N<sub>2</sub>O]<sup>+</sup> (M+H)<sup>+</sup> *m/z*: 307.1805, found: 307.1806.

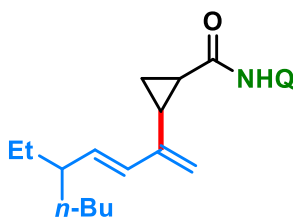

**29**, 69%, dr= 1:1

**(E)-2-(5-ethylnona-1,3-dien-2-yl)-N-(quinolin-8-yl)cyclopropanecarboxamide (29, dr 1:1)**

According to the general procedure, the title compound was prepared as mentioned from *N*-(quinolin-8-yl)cyclopropanecarboxamide **S18** (0.10 mmol 21.2 mg). The crude product was purified via flash column chromatography (Hex/EtOAc) to afford a yellow oily liq. **29** (25.0 mg, 69%).

**R<sub>f</sub>**: 0.26 (hexane /ethyl acetate, 9:1 v/v).

**<sup>1</sup>H NMR (400 MHz, CDCl<sub>3</sub>)** δ 9.90 (s, 1H), 8.84 – 8.73 (m, 1H), 8.70 (td, *J* = 7.3, 2.0 Hz, 1H), 8.19 – 8.02 (m, 1H), 7.49 – 7.33 (m, 3H), 6.06 (dd, *J* = 15.7, 8.1 Hz, 1H), 5.70 (ddd, *J* = 15.7, 9.1, 3.1 Hz, 1H), 5.25 – 5.07 (m, 2H), 2.26 – 2.18 (m, 1H), 2.17 – 2.08 (m, 1H), 1.75 – 1.64 (m, 2H), 1.27 (m, 3H), 1.18 – 1.11 (m, 2H), 1.09 – 0.96 (m, 2H), 0.85 – 0.66 (m, 5H), 0.29 – 0.15 (m, 3H).

**<sup>13</sup>C NMR (100 MHz, CDCl<sub>3</sub>)** δ 168.64, 147.94, 147.92, 141.29, 141.27, 138.35, 136.37, 135.83, 135.81, 134.95, 132.08, 128.05, 127.94, 127.66, 127.61, 121.53, 120.94, 120.92,

116.58, 116.56, 116.49, 116.46, 45.15, 45.09, 35.09, 34.82, 29.70, 29.48, 28.31, 28.09, 23.99, 23.92, 23.59, 23.55, 22.90, 22.34, 14.16, 13.71, 11.90, 11.48, 10.17, 10.15.

**HRMS (ESI):** calculated for  $[C_{24}H_{31}N_2O]^+$  (M+H)<sup>+</sup> m/z: 363.2431, found: 363.2423.

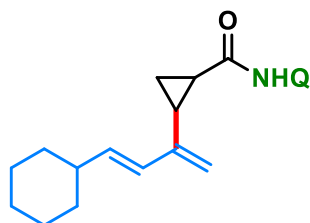

**30**, 85%

**2-((E)-4-cyclohexylbuta-1,3-dien-2-yl)-N-(quinolin-8-yl)cyclopropane-1-carboxamide**  
**(30)**

According to the general procedure, the title compound was prepared as mentioned from *N*-(quinolin-8-yl)cyclopropanecarboxamide **S18** (0.10 mmol 21.2 mg). The crude product was purified via flash column chromatography (Hex/EtOAc) to afford a yellow oily liq. **30** (29.4 mg, 85%).

**R<sub>f</sub>**: 0.25 (hexane /ethyl acetate, 9:1 v/v).

**<sup>1</sup>H NMR (500 MHz, CDCl<sub>3</sub>)** δ 9.89 (s, 1H), 8.80 (m, 1H), 8.70 (dd, *J* = 7.4, 1.3 Hz, 1H), 8.14 (d, *J* = 8.2 Hz, 1H), 7.51 – 7.40 (m, 3H), 6.08 (d, *J* = 15.9 Hz, 1H), 5.95 (dd, *J* = 15.9, 7.0 Hz, 1H), 5.17 (s, 1H), 5.16 (s, 1H), 2.24 (td, *J* = 8.4, 5.5 Hz, 1H), 2.13 (dd, *J* = 16.6, 8.4 Hz, 1H), 1.84 – 1.78 (m, 1H), 1.68 (dt, *J* = 7.3, 5.1 Hz, 1H), 1.55 – 1.47 (m, 2H), 1.32 – 1.25 (m, 3H), 1.10 – 1.03 (m, 1H), 1.01 – 0.96 (m, 1H), 0.94 – 0.90 (m, 1H), 0.88 – 0.85 (m, 1H), 0.77 (m, 1H).

**<sup>13</sup>C NMR (125 MHz, CDCl<sub>3</sub>)** δ 168.65, 147.86, 141.57, 138.24, 137.07, 136.34, 134.90, 129.45, 127.92, 127.56, 121.45, 120.91, 116.62, 116.36, 40.73, 32.83, 32.49, 26.06, 25.89, 25.81, 23.68, 23.52, 10.16.

**HRMS (ESI):** calculated for  $[C_{23}H_{27}N_2O]^+$  (M+H)<sup>+</sup> m/z: 347.2118, found: 347.2126.

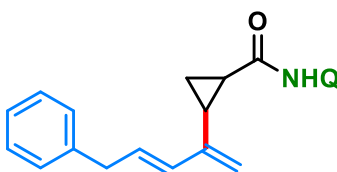

**31**, 87%

**2-((E)-5-phenylpenta-1,3-dien-2-yl)-N-(quinolin-8-yl)cyclopropane-1-carboxamide (31)**

According to the general procedure, the title compound was prepared as mentioned from *N*-(quinolin-8-yl)cyclopropanecarboxamide **S18** (0.10 mmol 21.2 mg). The crude product was purified via flash column chromatography (Hex/EtOAc) to afford a white sticky solid of **31** (30.9 mg, 87%).

*R<sub>f</sub>*: 0.25 (hexane /ethyl acetate, 9:1 v/v).

**<sup>1</sup>H NMR (400 MHz, CDCl<sub>3</sub>)** δ 9.83 (s, 1H), 8.72 (m, 2H), 8.17 (d, *J* = 7.4 Hz, 1H), 7.52 – 7.43 (m, 3H), 6.92 (dd, *J* = 6.8, 2.6 Hz, 2H), 6.85 – 6.70 (m, 3H), 6.26 – 6.07 (m, 2H), 5.21 (d, *J* = 6.2 Hz, 2H), 3.31 – 3.19 (m, 2H), 2.22 – 2.14 (m, 1H), 2.14 – 2.06 (m, 1H), 1.68 – 1.64 (m, 2H), 1.25 (td, *J* = 8.3, 4.9 Hz, 2H).

**<sup>13</sup>C NMR (100 MHz, CDCl<sub>3</sub>)** δ 168.56, 147.88, 141.03, 140.09, 138.25, 136.29, 134.82, 133.49, 129.32, 128.31, 127.97, 127.94, 127.54, 125.63, 121.48, 120.98, 117.55, 116.40, 39.05, 23.65, 23.32, 10.21.

**HRMS (ESI):** calculated for [C<sub>24</sub>H<sub>22</sub>N<sub>2</sub>NaO]<sup>+</sup> (*M*+Na)<sup>+</sup> *m/z*: 377.1624, found: 377.1632.

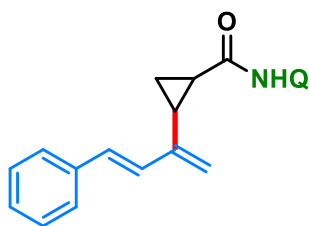

**32**, 80%

**2-((*E*)-4-phenylbuta-1,3-dien-2-yl)-*N*-(quinolin-8-yl)cyclopropane-1-carboxamide (32)**

The title compound was prepared according to the general procedure as mentioned from *N*-(quinolin-8-yl)cyclopropanecarboxamide **S18** (0.10 mmol 21.2 mg). The crude product was purified via flash column chromatography (Hex/EtOAc) to afford a light-yellow viscous compound of **32** (27.3 mg, 80%).

*R<sub>f</sub>*: 0.22 (hexane /ethyl acetate, 9:1 v/v).

**<sup>1</sup>H NMR (400 MHz, CDCl<sub>3</sub>)** δ = 9.95 (s, 1H), 8.67 (dd, *J*=4.2, 1.7, 1H), 8.62 (dd, *J*=7.1, 1.9, 1H), 8.07 (dd, *J*=8.3, 1.6, 1H), 7.45 – 7.34 (m, 3H), 7.31 – 7.27 (m, 2H), 7.17 – 7.12 (m, 2H), 7.11 – 7.06 (m, 1H), 6.93 (d, *J*=16.2, 1H), 6.82 (d, *J*=16.2, 1H), 5.38 (s, 1H), 5.33 (s, 1H), 2.39 – 2.33 (m, 1H), 2.24 (dt, *J*=19.1, 9.5, 1H), 1.73 (dt, *J*=7.4, 5.2, 1H), 1.34 (td, *J*=8.2, 5.0, 1H).

**<sup>13</sup>C NMR (100 MHz, CDCl<sub>3</sub>)** δ 168.53, 147.96, 141.15, 138.32, 137.44, 136.34, 134.78, 131.25, 129.02, 128.39, 127.96, 127.50, 127.31, 126.62, 121.49, 121.10, 119.33, 116.49, 23.85, 23.29, 10.04.

**HRMS (ESI):** calculated for  $[C_{23}H_{21}N_2O]^+$  (M+H)<sup>+</sup> m/z: 341.1648, found: 341.1652.

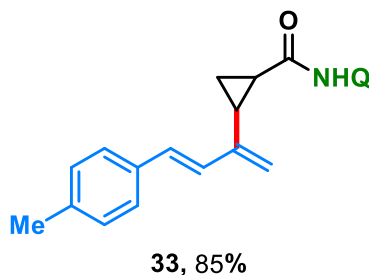

**N-(quinolin-8-yl)-2-((E)-4-(p-tolyl)buta-1,3-dien-2-yl)cyclopropane-1-carboxamide (33)**

The title compound was prepared according to the general procedure as mentioned from *N*-(quinolin-8-yl)cyclopropanecarboxamide **S18** (0.10 mmol 21.2 mg). The crude product was purified via flash column chromatography (Hex/EtOAc) to afford a yellow oily of **33** (30.1 mg, 85%).

**R<sub>f</sub>**: 0.25 (hexane /ethyl acetate, 9:1 v/v).

**<sup>1</sup>H NMR (400 MHz, CDCl<sub>3</sub>)** δ = 9.95 (s, 1H), 8.69 (dd, *J*=4.2, 1.7, 1H), 8.63 (dd, *J*=7.1, 1.9, 1H), 8.07 (dd, *J*=8.3, 1.7, 1H), 7.45 – 7.33 (m, 3H), 7.19 (d, *J*=8.1, 2H), 6.96 (d, *J*=8.0, 2H), 6.93 – 6.75 (m, 2H), 5.36 (s, 1H), 5.30 (s, 1H), 2.35 (ddd, *J*=13.4, 8.7, 4.7, 1H), 2.30 – 2.19 (m, 4H), 1.73 (dt, *J*=7.4, 5.2, 1H), 1.33 (td, *J*=8.2, 4.9, 1H).

**<sup>13</sup>C NMR (100 MHz, CDCl<sub>3</sub>)** δ 168.58, 147.93, 141.22, 138.31, 137.12, 136.33, 134.79, 134.66, 130.32, 129.11, 128.94, 127.95, 127.50, 126.54, 121.46, 121.07, 118.78, 116.49, 23.84, 23.36, 21.25, 10.08.

**HRMS (ESI):** calculated for  $[C_{24}H_{22}N_2NaO]^+$  (M+Na)<sup>+</sup> m/z: 377.1624, found: 377.1620.

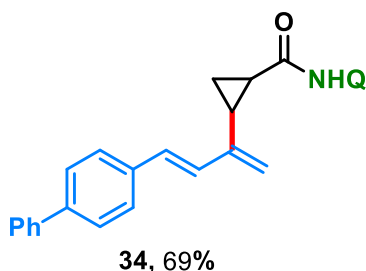

**2-((E)-4-([1,1'-biphenyl]-4-yl)buta-1,3-dien-2-yl)-N-(quinolin-8-yl)cyclopropane-1-carboxamide(34)**

The title compound was prepared according to the general procedure as mentioned from *N*-(quinolin-8-yl)cyclopropanecarboxamide **S18** (0.10 mmol 21.2 mg). The crude product was purified via flash column chromatography (Hex/EtOAc) to afford a light-yellow sticky solid of **34** (28.7 mg, 69%).

**R<sub>f</sub>**: 0.21 (hexane /ethyl acetate, 9:1 v/v).

**<sup>1</sup>H NMR (400 MHz, CDCl<sub>3</sub>)** δ = 9.98 (s, 1H), 8.70 (dd, *J*=4.2, 1.4, 1H), 8.65 (dd, *J*=7.4, 1.1, 1H), 8.05 (dd, *J*=8.3, 1.4, 1H), 7.52 (d, *J*=7.4, 2H), 7.42 – 7.33 (m, 10H), 6.98 (d, *J*=16.2, 1H), 6.88 (d, *J*=16.2, 1H), 5.42 (s, 1H), 5.37 (s, 1H), 2.42 – 2.35 (m, 1H), 2.28 (dd, *J*=17.4, 9.1, 1H), 1.80 – 1.72 (m, 1H), 1.38 – 1.32 (m, 1H).

**<sup>13</sup>C NMR (100 MHz, CDCl<sub>3</sub>)** δ 168.49, 147.91, 141.19, 140.76, 139.92, 138.25, 136.46, 136.29, 134.73, 131.26, 128.82, 128.53, 127.90, 127.44, 127.29, 127.01, 126.90, 121.45, 121.08, 119.45, 116.44, 23.80, 23.27, 10.03.

**HRMS (ESI)**: calculated for [C<sub>29</sub>H<sub>25</sub>N<sub>2</sub>O]<sup>+</sup> (M+H)<sup>+</sup> *m/z*: 417.1961, found: 417.1967.

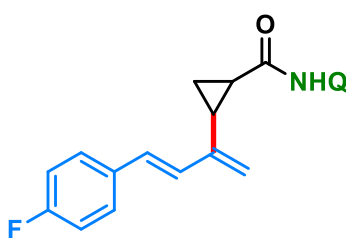

**35**, 80%

**2-((E)-4-(4-fluorophenyl)buta-1,3-dien-2-yl)-N-(quinolin-8-yl)cyclopropane-1-carboxamide (35)**

According to the general procedure, the title compound was prepared as mentioned from *N*-(quinolin-8-yl)cyclopropanecarboxamide **S18** (0.10 mmol 21.2 mg). The crude product was purified via flash column chromatography (Hex/EtOAc) to afford a light brown semi-solid of **35** (28.7 mg, 80%).

**R<sub>f</sub>**: 0.22 (hexane /ethyl acetate, 9:1 v/v).

**<sup>1</sup>H NMR (400 MHz, CDCl<sub>3</sub>)** δ = 9.94 (s, 1H), 8.68 (dd, *J*=4.2, 1.6, 1H), 8.61 (dd, *J*=6.9, 2.1, 1H), 8.09 (dd, *J*=8.3, 1.6, 1H), 7.45 – 7.35 (m, 3H), 7.26 – 7.20 (m, 2H), 6.93 – 6.68 (m, 4H), 5.37 (s, 1H), 5.32 (s, 1H), 2.40 – 2.30 (m, 1H), 2.24 (dd, *J*=16.1, 7.4, 1H), 1.75 – 1.71 (m, 1H), 1.37 – 1.31 (m, 1H).

**<sup>13</sup>C NMR (100 MHz, CDCl<sub>3</sub>)** δ 168.51, 163.39, 160.93, 147.95, 141.11, 138.30, 136.42, 134.75, 133.58, 131.03, 128.09, 128.01, 127.98, 127.84, 127.54, 121.53, 121.15, 119.46, 116.50, 115.37, 115.16, 23.81, 23.28, 10.11.

**<sup>19</sup>F NMR (376 MHz, CDCl<sub>3</sub>)** δ -114.94.

**HRMS (ESI)**: calculated for [C<sub>23</sub>H<sub>20</sub>FN<sub>2</sub>O]<sup>+</sup> (M+H)<sup>+</sup> *m/z*: 359.1554, found: 359.1555.

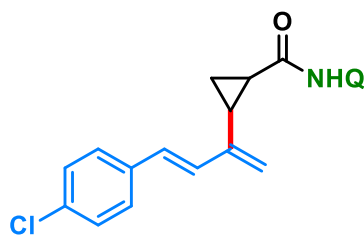

**36**, 95%

**2-((E)-4-(4-chlorophenyl)buta-1,3-dien-2-yl)-N-(quinolin-8-yl)cyclopropane-1-carboxamide (36)**

The title compound was prepared according to the general procedure as mentioned from *N*-(quinolin-8-yl)cyclopropanecarboxamide **S18** (0.10 mmol 21.2 mg). The crude product was purified via flash column chromatography (Hex/EtOAc) to afford a white solid of **36** (35.6 mg, 95%).

*R<sub>f</sub>*: 0.24 (hexane /ethyl acetate, 9:1 v/v).

<sup>1</sup>H NMR (400 MHz, CDCl<sub>3</sub>) δ = 9.93 (s, 1H), 8.75 – 8.56 (m, 2H), 8.13 – 8.01 (m, 1H), 7.46 – 7.35 (m, 3H), 7.17 (d, *J*=8.5, 2H), 7.06 (d, *J*=8.5, 2H), 6.88 – 6.74 (m, 2H), 5.37 (d, *J*=14.3, 2H), 2.34 (td, *J*=8.3, 5.6, 1H), 2.22 (q, *J*=8.5, 1H), 1.76 – 1.69 (m, 1H), 1.36 – 1.30 (m, 1H).

<sup>13</sup>C NMR (100 MHz, CDCl<sub>3</sub>) δ 168.41, 147.91, 141.03, 138.22, 136.37, 135.89, 134.66, 132.76, 131.76, 128.44, 127.92, 127.70, 127.45, 121.50, 121.14, 119.96, 116.43, 23.73, 23.20, 10.08.

HRMS (ESI): calculated for [C<sub>23</sub>H<sub>20</sub>ClN<sub>2</sub>O]<sup>+</sup> (M+H)<sup>+</sup> *m/z*: 375.1259, found: 375.1261.

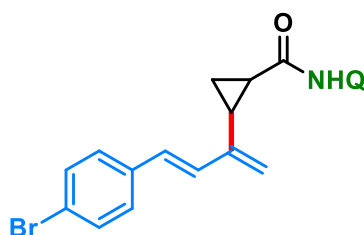

**37**, 89%

**2-((E)-4-(4-bromophenyl)buta-1,3-dien-2-yl)-N-(quinolin-8-yl)cyclopropane-1-carboxamide (37)**

The title compound was prepared according to the general procedure as mentioned from *N*-(quinolin-8-yl)cyclopropanecarboxamide **S18** (0.10 mmol 21.2 mg). The crude product was purified via flash column chromatography (Hex/EtOAc) to afford a light brown solid of **37** (37.3 mg, 89%).

*R<sub>f</sub>*: 0.25 (hexane /ethyl acetate, 9:1 v/v).

**<sup>1</sup>H NMR (400 MHz, CDCl<sub>3</sub>)** δ = 9.93 (s, 1H), 8.67 (dd, *J*=4.2, 1.6, 1H), 8.62 (dd, *J*=7.3, 1.7, 1H), 8.05 (dd, *J*=8.3, 1.6, 1H), 7.42 – 7.34 (m, 3H), 7.21 (d, *J*=8.5, 2H), 7.09 (d, *J*=8.5, 2H), 6.81 (m, 2H), 5.39 (s, 1H), 5.36 (s, 1H), 2.39 – 2.29 (m, 1H), 2.26 – 2.16 (m, 1H), 1.72 (dt, *J*=7.3, 5.2, 1H), 1.36 – 1.29 (m, 1H).

**<sup>13</sup>C NMR (100 MHz, CDCl<sub>3</sub>)** δ 168.35, 147.86, 140.99, 138.14, 136.33, 136.27, 134.61, 131.81, 131.33, 127.98, 127.86, 127.72, 127.40, 121.47, 121.11, 120.89, 120.05, 116.36, 23.67, 23.15, 10.04.

**HRMS (ESI):** calculated for [C<sub>23</sub>H<sub>20</sub>BrN<sub>2</sub>O]<sup>+</sup> (M+H)<sup>+</sup> *m/z*: 419.0754, found: 419.0755.

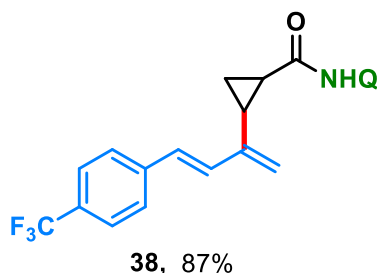

**(*N*-(quinolin-8-yl)-2-((*E*)-4-(4-(trifluoromethyl)phenyl)buta-1,3-dien-2-yl)cyclopropane-1-carboxamide (38)**

The title compound was prepared according to the general procedure as mentioned from *N*-(quinolin-8-yl)cyclopropanecarboxamide **S18** (0.10 mmol 21.2 mg). The crude product was purified via flash column chromatography (Hex/EtOAc) to afford a light brown solid of **38** (35.5 mg, 87%).

***R<sub>f</sub>***: 0.22 (hexane /ethyl acetate, 9:1 v/v).

**<sup>1</sup>H NMR (400 MHz, CDCl<sub>3</sub>)** δ = 9.94 (s, 1H), 8.66 (dd, *J*=4.2, 1.6, 1H), 8.60 (dd, *J*=7.2, 1.7, 1H), 8.06 (dd, *J*=8.3, 1.5, 1H), 7.46 – 7.27 (m, 7H), 6.92 (d, *J*=16.2, 1H), 6.86 (d, *J*=16.3, 1H), 5.45 (s, 1H), 5.41 (s, 1H), 2.42 – 2.31 (m, 1H), 2.24 (q, *J*=8.5, 1H), 1.74 (dt, *J*=7.3, 5.2, 1H), 1.35 (td, *J*=8.2, 5.0, 1H).

**<sup>13</sup>C NMR (100 MHz, CDCl<sub>3</sub>)** δ 168.34, 147.91, 140.98, 140.84, 138.18, 136.40, 134.62, 133.52, 128.65, 127.91, 127.54, 127.44, 126.59, 125.61, 125.22, 125.18, 122.91, 121.52, 121.18, 121.11, 116.40, 23.68, 23.12, 10.12.

**HRMS (ESI):** calculated for [C<sub>24</sub>H<sub>20</sub>F<sub>3</sub>N<sub>2</sub>O]<sup>+</sup> (M+H)<sup>+</sup> *m/z*: 409.1522., found: 409.1520.

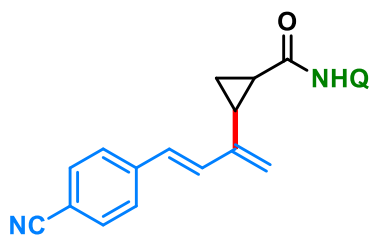

**39**, 89%

**2-((E)-4-(4-cyanophenyl)buta-1,3-dien-2-yl)-N-(quinolin-8-yl)cyclopropane-1-carboxamide (39)**

The title compound was prepared according to the general procedure as mentioned from *N*-(quinolin-8-yl)cyclopropanecarboxamide **S18** (0.10 mmol 21.2 mg). The crude product was purified via flash column chromatography (Hex/EtOAc) to afford a yellow sticky liq. **39** (32.5 mg, 89%).

**R<sub>f</sub>**: 0.18 (hexane /ethyl acetate, 9:1 v/v).

**<sup>1</sup>H NMR (400 MHz, CDCl<sub>3</sub>)** δ = 9.93 (s, 1H), 8.68 (dd, *J*=4.2, 1.6, 1H), 8.63 – 8.51 (m, 1H), 8.08 (d, *J*=8.3, 1H), 7.43 – 7.36 (m, 3H), 7.34 (d, *J*=8.4, 2H), 7.30 – 7.24 (m, 2H), 6.88 (s, 2H), 5.46 (s, 1H), 5.44 (d, *J*=1.3, 1H), 2.41 – 2.29 (m, 1H), 2.22 (q, *J*=8.6, 1H), 1.72 (dt, *J*=7.3, 5.2, 1H), 1.35 (td, *J*=8.2, 5.0, 1H)

**<sup>13</sup>C NMR (100 MHz, CDCl<sub>3</sub>)** δ 168.25, 147.91, 141.87, 140.88, 138.15, 136.46, 134.66, 134.55, 132.05, 127.90, 127.46, 127.16, 126.86, 122.02, 121.55, 121.22, 119.10, 116.42, 110.13, 23.61, 23.02, 10.18.

**HRMS (ESI)**: calculated for [C<sub>24</sub>H<sub>20</sub>N<sub>3</sub>O]<sup>+</sup> (M+H)<sup>+</sup> *m/z*: 366.1601., found: 366.1604.

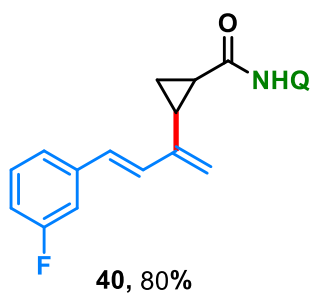

**40**, 80%

**2-((E)-4-(3-fluorophenyl)buta-1,3-dien-2-yl)-N-(quinolin-8-yl)cyclopropane-1-carboxamide (40)**

According to the general procedure, the title compound was prepared as mentioned from *N*-(quinolin-8-yl)cyclopropanecarboxamide **S18** (0.10 mmol 21.2 mg). The crude product was purified via flash column chromatography (Hex/EtOAc) to afford a yellow liq. **40** (28.7 mg, 80%).



**R<sub>f</sub>**: 0.23 (hexane /ethyl acetate, 9:1 v/v).

**<sup>1</sup>H NMR (400 MHz, CDCl<sub>3</sub>)** δ 9.95 (s, 1H), 8.70 (d, *J* = 3.6 Hz, 1H), 8.62 (d, *J* = 7.2 Hz, 1H), 8.05 (d, *J* = 8.1 Hz, 1H), 7.44 – 7.33 (m, 3H), 7.11 – 7.00 (m, 2H), 6.96 (d, *J* = 10.5 Hz, 1H), 6.91 – 6.72 (m, 3H), 5.41 (s, 1H), 5.37 (s, 1H), 2.35 (td, *J* = 8.4, 5.5 Hz, 1H), 2.22 (q, *J* = 8.4 Hz, 1H), 1.74 (dd, *J* = 12.4, 5.2 Hz, 1H), 1.33 (td, *J* = 8.2, 5.0 Hz, 1H).

**<sup>13</sup>C NMR (101 MHz, CDCl<sub>3</sub>)** δ 168.34, 164.13, 161.69, 147.99, 140.88, 139.76, 139.68, 138.17, 136.31, 134.63, 132.39, 129.70, 129.62, 127.88, 127.84, 127.81, 127.39, 122.20, 122.18, 121.51, 121.13, 120.32, 116.38, 114.06, 113.85, 113.21, 112.99, 23.70, 23.16, 9.97.

**HRMS (ESI)**: calculated for [C<sub>23</sub>H<sub>20</sub>FN<sub>2</sub>O]<sup>+</sup> (M+H)<sup>+</sup> *m/z*: 359.1554., found: 359.1560.

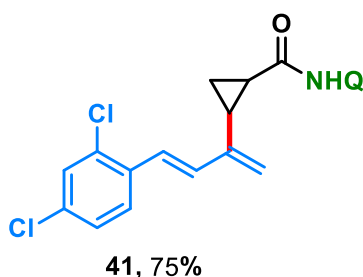

**2-((E)-4-(2,4-dichlorophenyl)buta-1,3-dien-2-yl)-N-(quinolin-8-yl)cyclopropane-1-carboxamide (41)**

The title compound was prepared according to the general procedure as mentioned from *N*-(quinolin-8-yl)cyclopropanecarboxamide **S18** (0.10 mmol 21.2 mg). The crude product was purified via flash column chromatography (Hex/EtOAc) to afford a yellow sticky solid. **41** (30.7 mg, 75%).

**R<sub>f</sub>**: 0.22 (hexane /ethyl acetate, 9:1 v/v).

**<sup>1</sup>H NMR (400 MHz, CDCl<sub>3</sub>)** δ 10.01 (s, 1H), 8.70 – 8.65 (m, 1H), 8.62 (d, *J* = 7.3 Hz, 1H), 8.03 (d, *J* = 8.2 Hz, 1H), 7.50 – 7.28 (m, 4H), 7.20 – 7.11 (m, 2H), 6.89 (t, *J* = 7.9 Hz, 1H), 6.76 (d, *J* = 16.1 Hz, 1H), 5.45 (s, 1H), 5.42 (s, 1H), 2.38 (td, *J* = 8.3, 5.6 Hz, 1H), 2.27 (q, *J* = 8.3 Hz, 1H), 1.74 (dd, *J* = 12.3, 5.2 Hz, 1H), 1.35 (td, *J* = 8.1, 5.0 Hz, 1H).

**<sup>13</sup>C NMR (100 MHz, CDCl<sub>3</sub>)** δ 168.36, 148.00, 141.11, 138.15, 137.78, 136.15, 134.73, 134.61, 133.02, 131.43, 128.73, 127.83, 127.33, 126.84, 125.24, 124.67, 121.51, 121.26, 121.09, 116.27, 23.46, 23.28, 10.18.

**HRMS (ESI)**: calculated for [C<sub>23</sub>H<sub>19</sub>Cl<sub>2</sub>N<sub>2</sub>O]<sup>+</sup> (M+H)<sup>+</sup> *m/z*: 409.0869., found: 409.0868.

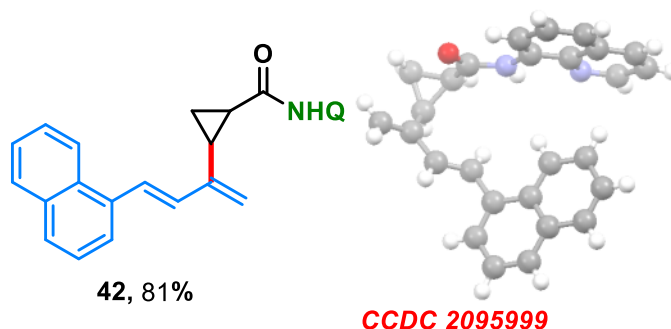

**2-((E)-4-(naphthalen-1-yl)buta-1,3-dien-2-yl)-N-(quinolin-8-yl)cyclopropane-1-carboxamide (42)**

The title compound was prepared according to the general procedure as mentioned from *N*-(quinolin-8-yl)cyclopropanecarboxamide **S18** (0.10 mmol 21.2 mg). The crude product was purified via flash column chromatography (Hex/EtOAc) to afford a light-yellow solid of **42** (31.6 mg, 81%).

**R<sub>f</sub>**: 0.24 (hexane /ethyl acetate, 9:1 v/v).

**<sup>1</sup>H NMR (500 MHz, CDCl<sub>3</sub>)** δ = 10.12 (s, 1H), 8.71 (d, *J*=7.4, 1H), 8.53 (dd, *J*=4.2, 1.5, 1H), 8.08 (d, *J*=8.2, 1H), 8.04 (d, *J*=8.5, 1H), 7.74 (d, *J*=8.2, 1H), 7.65 (m, 2H), 7.47 – 7.40 (m, 3H), 7.36 – 7.31 (m, 2H), 7.30 – 7.24 (m, 1H), 6.98 – 6.93 (m, 1H), 6.89 (d, *J*=15.9, 1H), 5.48 (s, *J*=12.8, 1H), 5.44 (s, 1H), 2.46 (td, *J*=8.3, 5.5, 1H), 2.38 (dd, *J*=16.5, 8.3, 1H), 1.82 (dt, *J*=7.2, 5.2, 1H), 1.42 (td, *J*=8.1, 4.9, 1H).

**<sup>13</sup>C NMR (125 MHz, CDCl<sub>3</sub>)** δ 168.59, 147.96, 141.59, 138.27, 136.24, 135.34, 134.79, 134.36, 133.56, 131.36, 128.38, 127.91, 127.67, 127.54, 126.24, 125.63, 125.61, 125.54, 124.02, 123.88, 121.44, 121.12, 119.93, 116.52, 23.73, 23.59, 10.35.

**HRMS (ESI)**: calculated for [C<sub>27</sub>H<sub>23</sub>N<sub>2</sub>O]<sup>+</sup> (*M*+H)<sup>+</sup> *m/z*: 391.1805., found: 391.1809.

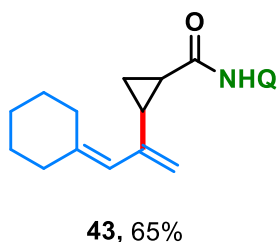

**2-(3-cyclohexylideneprop-1-en-2-yl)-N-(quinolin-8-yl)cyclopropanecarboxamide (43)**

According to the general procedure, the title compound was prepared as mentioned from *N*-(quinolin-8-yl)cyclopropanecarboxamide **S18** (0.10 mmol 21.2 mg). The crude product was purified via flash column chromatography (Hex/EtOAc) to afford a yellow liq. of **43a** (21.6 mg, 65%).

**R<sub>f</sub>**: 0.25 (hexane /ethyl acetate, 9:1 v/v).

**<sup>1</sup>H NMR (500 MHz, CDCl<sub>3</sub>)** δ= 9.91 (s, 1H), 8.81 (d, 1H), 8.75 (d, *J* = 7.3 Hz, 1H), 8.13 (d, *J* = 8.1 Hz, 1H), 7.54 – 7.38 (m, 3H), 5.63 (s, 1H), 5.22 (s, 1H), 5.02 (s, 1H), 2.26 (s, 2H), 2.13 (dd, *J* = 14.5, 7.9 Hz, 1H), 2.07 (dd, *J* = 16.3, 8.1 Hz, 1H), 1.94 (s, 2H), 1.68 (d, *J* = 5.2 Hz, 1H), 1.41 – 1.20 (m, 7H).

**<sup>13</sup>C NMR (125 MHz, CDCl<sub>3</sub>)** δ= 168.54, 147.97, 142.97, 140.30, 138.30, 136.32, 134.91, 127.94, 127.49, 122.83, 121.51, 120.98, 116.42, 115.84, 37.60, 29.78, 28.40, 27.78, 27.43, 26.64, 24.23, 10.64.

**HRMS (ESI)**: calculated for [C<sub>22</sub>H<sub>25</sub>N<sub>2</sub>O]<sup>+</sup> (*M*+*H*)<sup>+</sup> *m/z*: 333.1961., found: 333.1973.

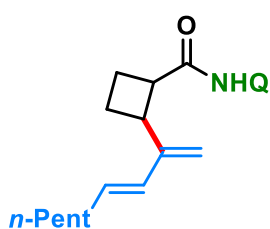

**44**, 69%

**2-((*E*)-nona-1,3-dien-2-yl)-*N*-(quinolin-8-yl)cyclobutane-1-carboxamide (44)**

The title compound was prepared according to the general procedure as mentioned from *N*-(quinolin-8-yl)cyclobutanecarboxamide **S19** (0.10 mmol 22.6 mg). The crude product was purified via flash column chromatography (Hex/EtOAc) to afford a yellow sticky solid of **44** (24.0 mg, 69%).

**R<sub>f</sub>**: 0.24 (hexane /ethyl acetate, 9:1 v/v).

**<sup>1</sup>H NMR (400 MHz, CDCl<sub>3</sub>)** δ= 9.59 (s, 1H), 8.79 (dd, *J* = 7.5, 1.4 Hz, 1H), 8.73 (dd, *J* = 4.2, 1.6 Hz, 1H), 8.12 (dd, *J* = 8.2, 1.2 Hz, 1H), 7.52 – 7.43 (m, 2H), 7.43 – 7.39 (m, 1H), 5.97 (d, *J* = 16.0 Hz, 1H), 5.83 (dt, *J* = 15.9, 6.6 Hz, 1H), 5.00 (s, 2H), 3.75 (dd, *J* = 18.0, 9.0 Hz, 1H), 3.67 – 3.56 (m, 1H), 2.63 (dd, *J* = 19.9, 9.9 Hz, 1H), 2.41 (tt, *J* = 9.4, 2.8 Hz, 1H), 2.30 – 2.19 (m, 1H), 2.14 – 2.05 (m, 2H), 2.01 – 1.94 (m, 1H), 1.34 – 1.28 (m, 3H), 1.20 – 1.16 (m, 3H), 0.79 (t, *J* = 7.1 Hz, 3H).

**<sup>13</sup>C NMR (100 MHz, CDCl<sub>3</sub>)** δ= 171.61, 147.59, 144.48, 138.27, 136.39, 134.80, 131.66, 130.56, 127.96, 127.55, 121.36, 120.98, 116.41, 114.35, 47.41, 40.02, 32.95, 31.59, 28.88, 23.33, 22.49, 20.91, 14.02.

**HRMS (ESI)**: calculated for [C<sub>23</sub>H<sub>29</sub>N<sub>2</sub>O]<sup>+</sup> (*M*+*H*)<sup>+</sup> *m/z*: 349.2274, found: 349.2271.

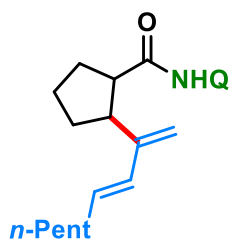

**45**, 25%

**(E)-2-((E)-nona-1,3-dien-2-yl)-N-(quinolin-8-yl)cyclopentanecarboxamide (45)**

The title compound was prepared according to the general procedure as mentioned from *N*-(quinolin-8-yl)cyclopentanecarboxamide **S20** (0.20 mmol 48.1 mg). The crude product was purified via flash column chromatography (Hex/EtOAc) to afford a light-yellow oily liq. of **45** (18.1 mg, 25%).

*R<sub>f</sub>*: 0.26 (hexane /ethyl acetate, 9:1 v/v).

**<sup>1</sup>H NMR (500 MHz, CDCl<sub>3</sub>)**  $\delta$  = 9.66 (s, 1H), 8.76 (dd, *J* = 4.1, 1.6 Hz, 1H), 8.73 (dd, *J* = 7.5, 1.5 Hz, 1H), 8.15 (dd, *J* = 8.2, 1.6 Hz, 1H), 7.54 – 7.37 (m, 3H), 6.08 (d, *J* = 15.9 Hz, 1H), 5.98 – 5.88 (m, 1H), 5.00 (s, 1H), 4.87 (s, 1H), 3.41 – 3.30 (m, 1H), 3.21 – 3.09 (m, 1H), 2.39 – 2.32 (m, 1H), 2.24 – 2.17 (m, 1H), 2.13 – 2.09 (m, 2H), 2.06 – 2.02 (m, 2H), 1.83 – 1.78 (m, 1H), 1.73 – 1.68 (m, 1H), 1.47 – 1.42 (m, 2H), 1.32 – 1.30 (m, 4H), 0.90 (t, *J* = 5.8 Hz, 3H).

**<sup>13</sup>C NMR (125 MHz, CDCl<sub>3</sub>)**  $\delta$  = 173.47, 147.84, 144.95, 138.64, 136.29, 134.91, 133.30, 130.16, 128.05, 127.59, 121.51, 121.03, 116.24, 114.05, 50.02, 46.43, 33.18, 31.82, 29.83, 29.22, 28.20, 23.98, 22.72, 14.20.

**HRMS (ESI)**: calculated for [C<sub>24</sub>H<sub>31</sub>N<sub>2</sub>O]<sup>+</sup> (*M*+*H*)<sup>+</sup> *m/z*: 363.2431, found: 363.2422.

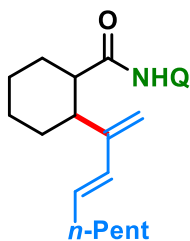

**46**, 58%

**2-((E)-nona-1,3-dien-2-yl)-N-(quinolin-8-yl)cyclohexane-1-carboxamide (46)**

According to the general procedure, the title compound was prepared as mentioned from *N*-(quinolin-8-yl)cyclohexanecarboxamide **S21** (0.20 mmol 50.9 mg). The crude product was purified via flash column chromatography (Hex/EtOAc) to afford a yellow oily liq. of **46** (43.7 mg, 58%).

**R<sub>f</sub>**: 0.26 (hexane /ethyl acetate, 9:1 v/v).

**<sup>1</sup>H NMR (400 MHz, CDCl<sub>3</sub>)** δ 9.75 (s, 1H), 8.76 (m, 2H), 8.11 (dd, *J* = 8.3, 1.6 Hz, 1H), 7.49 – 7.39 (m, 3H), 5.96 (d, *J* = 16.3 Hz, 1H), 5.87 (dt, *J* = 15.7, 6.4 Hz, 1H), 4.97 (s, 1H), 4.92 (s, 1H), 2.73 (td, *J* = 11.3, 3.2 Hz, 1H), 2.61 (td, *J* = 11.5, 3.5 Hz, 1H), 2.13 (dd, *J* = 12.6, 2.3 Hz, 1H), 2.03 – 1.94 (m, 3H), 1.47 – 1.38 (m, 3H), 1.35 – 1.20 (m, 8H), 0.84 (t, *J* = 6.9 Hz, 3H).

**<sup>13</sup>C NMR (100 MHz, CDCl<sub>3</sub>)** δ 173.94, 149.97, 147.98, 138.49, 136.29, 134.73, 130.92, 130.71, 127.93, 127.45, 121.47, 121.12, 116.49, 111.56, 52.03, 42.62, 33.41, 32.96, 31.53, 30.91, 28.98, 26.32, 25.79, 22.54, 14.07.

**HRMS (ESI)**: calculated for [C<sub>25</sub>H<sub>33</sub>N<sub>2</sub>O]<sup>+</sup> (M+H)<sup>+</sup> *m/z*: 377.2587, found: 377.2592.

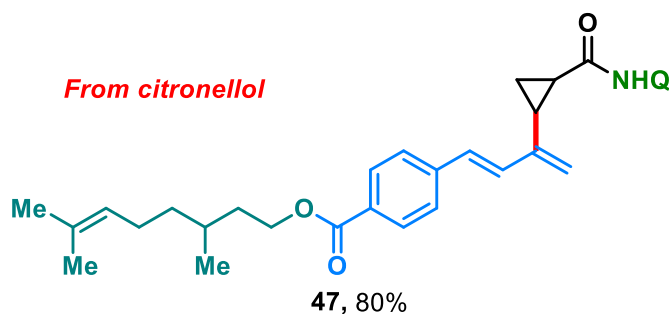

**3,7-dimethyloct-6-en-1-yl (E)-4-(3-(2-(quinolin-8-ylcarbamoyl)cyclopropyl)buta-1,3-dien-1-yl)benzoate (47)**

According to the general procedure, the title compound was prepared as mentioned from *N*-(quinolin-8-yl)cyclopropanecarboxamide **S18** (0.10 mmol 21.2 mg). The crude product was purified via flash column chromatography (Hex/EtOAc) to afford a light-yellow semi solid **47** (41.7 mg, 80%).

**R<sub>f</sub>**: 0.18 (hexane /ethyl acetate, 9:1 v/v).

**<sup>1</sup>H NMR (500 MHz, CDCl<sub>3</sub>)** δ 10.00 (s, 1H), 8.71 (dd, *J* = 4.1, 1.5 Hz, 1H), 8.66 – 8.60 (m, 1H), 8.09 (d, *J* = 8.2 Hz, 1H), 7.81 (d, *J* = 8.3 Hz, 2H), 7.45 – 7.37 (m, 3H), 7.34 (d, *J* = 8.3 Hz, 2H), 7.01 – 6.88 (m, 2H), 5.45 (d, *J* = 21.8 Hz, 2H), 5.11 (t, *J* = 7.0 Hz, 1H), 4.37 – 4.27 (m, 2H), 2.40 (dd, *J* = 13.9, 8.3 Hz, 1H), 2.27 (q, *J* = 8.3 Hz, 1H), 2.07 – 1.95 (m, 2H), 1.82 – 1.75 (m, 2H), 1.68 (s, *J* = 9.3 Hz, 3H), 1.65 (dd, *J* = 12.7, 5.9 Hz, 1H), 1.62 (s, 3H), 1.59 – 1.53 (m, 1H), 1.44 – 1.34 (m, 2H), 1.28 – 1.21 (m, 1H), 0.97 (d, *J* = 6.6 Hz, 3H).

$^{13}\text{C}$  NMR (125 MHz,  $\text{CDCl}_3$ )  $\delta$  168.40, 166.55, 147.86, 141.84, 141.03, 136.56, 134.57, 133.56, 131.50, 129.65, 128.93, 128.02, 127.95, 127.52, 126.36, 124.66, 121.52, 121.20, 120.98, 116.61, 63.49, 37.08, 35.59, 29.65, 25.83, 25.50, 23.72, 23.16, 19.61, 17.78, 10.09.

HRMS (ESI): calculated for  $[\text{C}_{34}\text{H}_{39}\text{N}_2\text{O}_3]^+$  ( $\text{M}+\text{H}$ ) $^+$   $m/z$ : 523.2955, found: 523.2961.

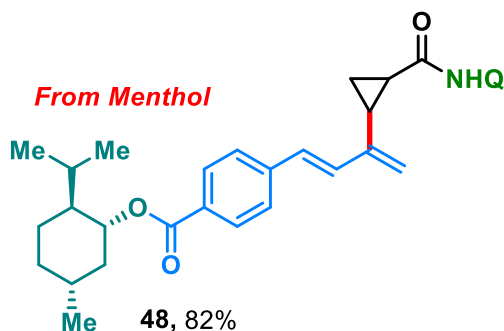

**(1R,2S,5R)-2-isopropyl-5-methylcyclohexyl 4-((E)-3-(2-(quinolin-8-ylcarbamoyl)cyclopropyl)buta-1,3-dien-1-yl)benzoate (48)**

According to the general procedure, the title compound was prepared as mentioned from *N*-(quinolin-8-yl)cyclopropanecarboxamide **S18** (0.10 mmol 21.2 mg). The crude product was purified via flash column chromatography (Hex/EtOAc) to afford a yellow sticky solid **48** (42.9 mg, 82%).

$R_f$ : 0.19 (hexane /ethyl acetate, 9:1 v/v).

$^1\text{H}$  NMR (400 MHz,  $\text{CDCl}_3$ )  $\delta$  9.95 (s, 1H), 8.68 (ddd,  $J$  = 7.2, 4.2, 1.1 Hz, 1H), 8.60 (d,  $J$  = 7.1 Hz, 1H), 8.05 (dd,  $J$  = 8.2, 1.0 Hz, 1H), 7.79 (dd,  $J$  = 8.2, 3.2 Hz, 2H), 7.43 – 7.33 (m, 3H), 7.30 (d,  $J$  = 8.3 Hz, 2H), 6.99 – 6.84 (m, 2H), 5.44 (s, 1H), 5.40 (s, 1H), 4.93 – 4.80 (m, 1H), 2.36 (dd,  $J$  = 13.9, 8.3 Hz, 1H), 2.24 (q,  $J$  = 8.3 Hz, 1H), 2.11 – 2.04 (m, 1H), 1.94 – 1.84 (m, 1H), 1.79 – 1.68 (m, 3H), 1.56 – 1.42 (m, 2H), 1.37 – 1.31 (m, 1H), 1.16 – 1.01 (m, 2H), 0.92 – 0.86 (m, 6H), 0.77 (dd,  $J$  = 6.8, 1.0 Hz, 3H).

$^{13}\text{C}$  NMR (100 MHz,  $\text{CDCl}_3$ )  $\delta$  168.36, 165.94, 147.96, 141.74, 141.70, 141.05, 141.02, 138.19, 136.33, 134.63, 133.47, 133.44, 129.66, 129.64, 129.24, 128.04, 127.90, 127.43, 126.31, 121.52, 121.49, 121.15, 120.92, 116.40, 74.74, 47.33, 41.06, 34.40, 31.51, 26.60, 26.55, 23.70, 23.14, 22.15, 20.85, 16.67, 16.62, 10.12, 10.07.

HRMS (ESI): calculated for  $[\text{C}_{34}\text{H}_{39}\text{N}_2\text{O}_3]^+$  ( $\text{M}+\text{H}$ ) $^+$   $m/z$ : 523.2955, found: 523.2957.

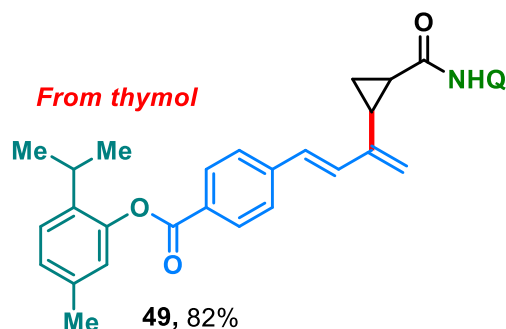

**5-isopropyl-2-methylphenyl 4-((E)-3-2-(quinolin-8-ylcarbamoyl)cyclopropyl)buta-1,3-dien-1-yl)benzoate (49)**

According to the general procedure, the title compound was prepared as mentioned from *N*-(quinolin-8-yl)cyclopropanecarboxamide **S18** (0.10 mmol 21.2 mg). The crude product was purified via flash column chromatography (Hex/EtOAc) to afford a light-yellow semi solid **49** (40.3 mg, 78%).

**R<sub>f</sub>**: 0.21 (hexane /ethyl acetate, 9:1 v/v).

**<sup>1</sup>H NMR (400 MHz, CDCl<sub>3</sub>)** δ 10.00 (s, 1H), 8.72 (dd, *J* = 4.2, 1.7 Hz, 1H), 8.64 (dd, *J* = 7.3, 1.7 Hz, 1H), 8.07 (dd, *J* = 8.3, 1.7 Hz, 1H), 8.00 – 7.91 (m, 2H), 7.47 – 7.34 (m, 5H), 7.24 (d, *J* = 7.9 Hz, 1H), 7.06 (dd, *J* = 7.9, 0.8 Hz, 1H), 6.98 (d, *J* = 2.7 Hz, 2H), 6.91 (d, *J* = 0.9 Hz, 1H), 5.49 (s, 1H), 5.45 (s, 1H), 3.02 (hept, *J* = 6.9 Hz, 1H), 2.42 – 2.36 (m, 1H), 2.34 (s, 3H), 2.27 (dd, *J* = 16.3, 8.6 Hz, 1H), 1.76 (dt, *J* = 7.3, 5.2 Hz, 1H), 1.37 (td, *J* = 8.2, 4.9 Hz, 1H), 1.21 (s, 3H), 1.20 (s, 3H).

**<sup>13</sup>C NMR (100 MHz, CDCl<sub>3</sub>)** δ 168.34, 165.17, 148.21, 147.94, 142.58, 141.01, 138.17, 137.21, 136.68, 136.38, 134.62, 134.01, 130.23, 127.91, 127.85, 127.44, 127.19, 126.56, 126.53, 122.94, 121.52, 121.32, 121.16, 116.44, 27.34, 23.66, 23.11, 20.93, 10.11.

**HRMS (ESI)**: calculated for [C<sub>34</sub>H<sub>33</sub>N<sub>2</sub>O<sub>3</sub>]<sup>+</sup> (M+H)<sup>+</sup> *m/z*: 517.2486, found: 517.2480.

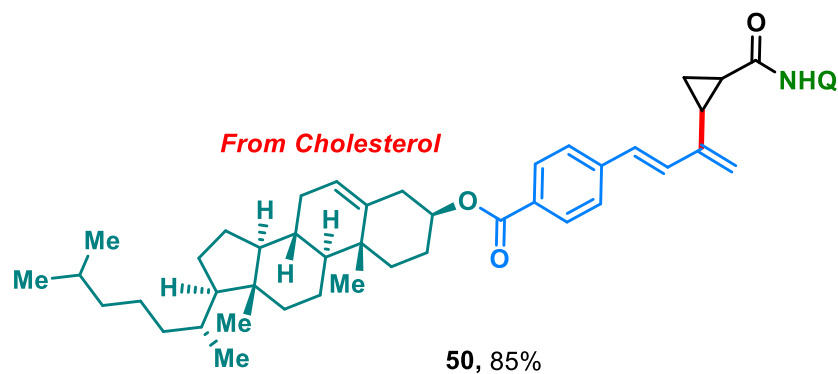

**(3*S*,8*S*,9*S*,10*R*,13*R*,14*S*,17*R*)-10,13-dimethyl-17-((*R*)-6-methylheptan-2-yl)-2,3,4,7,8,9,10,11,12,13,14,15,16,17-tetradecahydro-1*H*-cyclopenta[*a*]phenanthren-3-yl 4-((*E*)-3-(2-(quinolin-8-ylcarbamoyl)cyclopropyl)buta-1,3-dien-1-yl)benzoate (50)**

The title compound was prepared according to the general procedure as mentioned from *N*-(quinolin-8-yl)cyclopropanecarboxamide **S18** (0.10 mmol 21.2 mg). The crude product was purified via flash column chromatography (Hex/EtOAc) to afford a light-yellow semi solid **50** (64.0 mg, 85%).

***R<sub>f</sub>***: 0.20 (hexane /ethyl acetate, 9:1 v/v).

**<sup>1</sup>H NMR (400 MHz, CDCl<sub>3</sub>)** δ 9.95 (s, 1H), 8.68 (dd, *J* = 4.1, 1.1 Hz, 1H), 8.60 (dd, *J* = 7.0, 1.6 Hz, 1H), 8.06 (dd, *J* = 8.2, 1.1 Hz, 1H), 7.79 (d, *J* = 8.2 Hz, 2H), 7.46 – 7.34 (m, 3H), 7.30 (d, *J* = 8.3 Hz, 2H), 7.00 – 6.86 (m, 2H), 5.44 (s, 1H), 5.40 (s, 2H), 4.85 – 4.71 (m, 1H), 2.41 (t, *J* = 7.6 Hz, 2H), 2.38 – 2.32 (m, 1H), 2.24 (q, *J* = 8.3 Hz, 1H), 2.04 – 1.92 (m, 3H), 1.89 – 1.80 (m, 2H), 1.77 – 1.69 (m, 2H), 1.60 – 1.43 (m, 6H), 1.40 – 1.29 (m, 4H), 1.28 – 1.23 (m, 1H), 1.22 – 1.07 (m, 7H), 1.05 (s, 3H), 1.04 – 0.95 (m, 3H), 0.92 (d, *J* = 6.5 Hz, 3H), 0.88 (d, *J* = 1.3 Hz, 3H), 0.86 (d, *J* = 1.3 Hz, 3H), 0.68 (s, 3H).

**<sup>13</sup>C NMR (101 MHz, CDCl<sub>3</sub>)** δ 168.34, 165.85, 147.97, 141.73, 141.00, 139.75, 138.20, 136.36, 134.63, 133.48, 129.65, 129.24, 128.04, 127.91, 127.45, 126.30, 122.85, 121.55, 121.17, 120.92, 116.41, 74.53, 56.78, 56.23, 50.12, 42.41, 39.83, 39.62, 38.32, 37.12, 36.73, 36.29, 35.91, 32.03, 31.96, 28.35, 28.13, 27.98, 24.40, 23.95, 23.72, 23.14, 22.95, 22.69, 21.14, 19.48, 18.83, 11.97, 10.07.

**HRMS (ESI)**: calculated for [C<sub>51</sub>H<sub>65</sub>N<sub>2</sub>O<sub>3</sub>]<sup>+</sup> (*M*+*H*)<sup>+</sup> *m/z*: 753.4990, found: 753.4976.



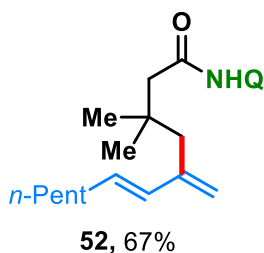

**(E)-3,3-dimethyl-5-methylene-N-(quinolin-8-yl)dodec-6-enamide (52)**

According to the general procedure, the title compound was prepared as mentioned from 3,3-dimethyl-*N*-(quinolin-8-yl)butanamide **S22** (0.20 mmol 48.5 mg). The crude product was purified via flash column chromatography (Hex/EtOAc) to afford a yellow liq. of **52** (48.8 mg, 67%).

**R<sub>f</sub>**: 0.24 (hexane /ethyl acetate, 9:1 v/v).

**<sup>1</sup>H NMR (500 MHz, CDCl<sub>3</sub>)** δ= 9.77 (s, 1H), 8.83 – 8.78 (m, 2H), 8.17 (d, *J* = 8.1 Hz, 1H), 7.56 – 7.48 (m, 2H), 7.45 (dd, *J* = 8.1, 4.2 Hz, 1H), 6.08 (d, *J* = 15.7 Hz, 1H), 5.84 – 5.73 (m, 1H), 5.11 (s, 1H), 4.89 (s, 1H), 2.49 (s, 2H), 2.41 (s, 2H), 2.09 – 2.04 (m, 2H), 1.38 – 1.35 (m, 2H), 1.27 – 1.24 (m, 4H), 1.16 – 1.11 (m, 6H), 0.85 (t, *J* = 6.8 Hz, 3H).

**<sup>13</sup>C NMR (125 MHz, CDCl<sub>3</sub>)** δ= 170.87, 148.80, 148.15, 143.47, 136.66, 134.67, 133.54, 131.43, 131.23, 128.12, 127.64, 121.66, 121.45, 116.96, 50.68, 43.82, 34.72, 32.98, 31.58, 29.21, 28.08, 22.63, 14.17.

**HRMS (ESI)**: calculated for [C<sub>24</sub>H<sub>33</sub>N<sub>2</sub>O]<sup>+</sup> (M+H)<sup>+</sup> *m/z*: 365.2587, found: 365.2585

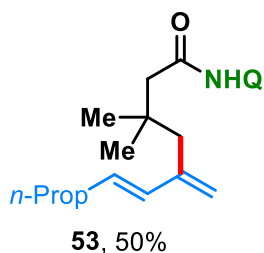

**(E)-3,3-dimethyl-5-methylene-N-(quinolin-8-yl)dec-6-enamide (53)**

The title compound was prepared according to the general procedure as mentioned from 3,3-dimethyl-*N*-(quinolin-8-yl)butanamide **S22** (0.20 mmol 48.5 mg). The crude product was purified via flash column chromatography (Hex/EtOAc) to afford a light-yellow liq. of **53** (33.6 mg, 50%).

**R<sub>f</sub>**: 0.27 (hexane /ethyl acetate, 9:1 v/v).

**<sup>1</sup>H NMR (400 MHz, CDCl<sub>3</sub>)** δ= 9.75 (s, 1H), 8.84 – 8.77 (m, 2H), 8.16 (dd, *J* = 8.3, 1.6 Hz, 1H), 7.57 – 7.42 (m, 4H), 6.09 (d, *J* = 15.7 Hz, 1H), 5.78 (d, *J* = 15.7 Hz, 1H), 5.12 (d, *J* =

2.0 Hz, 1H), 4.90 (d,  $J = 1.9$  Hz, 1H), 2.48 (s, 2H), 2.41 (s, 2H), 2.08 – 2.04 (m, 2H), 1.43 – 1.37 (m, 3H), 1.14 (s, 6H), 0.88 (t,  $J = 7.4$  Hz, 3H).

**$^{13}\text{C}$  NMR (101 MHz,  $\text{CDCl}_3$ )**  $\delta$  = 170.83, 148.27, 143.47, 138.55, 136.48, 134.73, 133.77, 130.95, 128.09, 127.57, 121.68, 121.43, 117.00, 116.50, 50.73, 43.87, 35.08, 34.72, 28.07, 22.70, 13.86.

**HRMS (ESI):** calculated for  $[\text{C}_{22}\text{H}_{29}\text{N}_2\text{O}]^+$ ,  $(\text{M}+\text{H})^+$   $m/z$ : 337.2274; Found = 337.2277

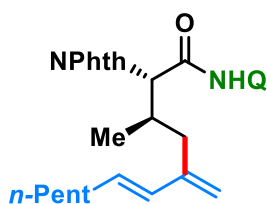

**54**, 64%

**(S)-(E)-2-(1,3-dioxoisindolin-2-yl)-3-methyl-5-methylene-N-(quinolin-8-yl)dodec-6-enamide (54)**

The title compound was prepared according to the general procedure as mentioned from (S)-2-(1,3-dioxoisindolin-2-yl)-3-methyl-N-(quinolin-8-yl)butanamide **S23** (0.20 mmol 74.7 mg). The crude product was purified via flash column chromatography (Hex/EtOAc) to afford a yellow sticky solid of **54** (63.4 mg, 64%).

**$R_f$** : 0.14 (hexane /ethyl acetate, 9:1 v/v).

**$^1\text{H}$  NMR (400 MHz,  $\text{CDCl}_3$ )**  $\delta$  = 10.78 (s, 1H), 8.85 (dd,  $J = 4.2, 1.7$  Hz, 1H), 8.79 (dd,  $J = 5.7, 3.4$  Hz, 1H), 8.14 (dd,  $J = 8.3, 1.7$  Hz, 1H), 7.88 (dd,  $J = 5.5, 3.0$  Hz, 2H), 7.73 (dd,  $J = 5.5, 3.0$  Hz, 2H), 7.52 (d,  $J = 2.3$  Hz, 1H), 7.51 (s, 1H), 7.44 (dd,  $J = 8.3, 4.2$  Hz, 1H), 5.99 (d,  $J = 15.9$  Hz, 1H), 5.79 (dt,  $J = 15.8, 6.8$  Hz, 1H), 4.96 (s, 1H), 4.92 (s, 1H), 4.79 (d,  $J = 10.8$  Hz, 1H), 3.31 (dd,  $J = 6.7, 3.5$  Hz, 1H), 2.80 (dd,  $J = 13.5, 2.9$  Hz, 1H), 2.02 (dd,  $J = 13.5, 10.8$  Hz, 1H), 1.95 – 1.85 (m, 2H), 1.19 – 1.04 (m, 6H), 0.90 (d,  $J = 6.6$  Hz, 3H), 0.80 (t,  $J = 7.1$  Hz, 3H).

**$^{13}\text{C}$  NMR (100 MHz,  $\text{CDCl}_3$ )**  $\delta$  = 168.24, 166.90, 148.65, 143.65, 138.90, 136.26, 134.44, 131.71, 131.22, 128.06, 127.39, 123.83, 122.14, 121.73, 117.22, 115.62, 62.66, 37.60, 33.03, 31.53, 31.10, 28.92, 22.57, 16.10, 14.13.

**HRMS (ESI):** calculated for  $[\text{C}_{31}\text{H}_{34}\text{N}_3\text{O}_3]^+$   $(\text{M}+\text{H})^+$   $m/z$ : 496.2595, found: 496.2592.

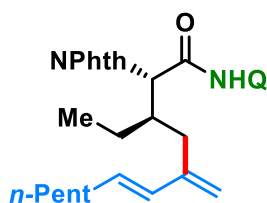

**55**, 66%

**(2S,3R,E)-2-(1,3-dioxisoindolin-2-yl)-3-ethyl-5-methylene-N-(quinolin-8-yl)dodec-6-enamide (55)**

The title compound was prepared according to the general procedure as mentioned from (2S,3S)-2-(1,3-dioxisoindolin-2-yl)-3-methyl-N-(quinolin-8-yl)pentanamide **S24** (0.20 mmol 77.5 mg). The crude product was purified via flash column chromatography (Hex/EtOAc) to afford a yellow oily liq. of **55** (67.3 mg, 66%).

**R<sub>f</sub>**: 0.15 (hexane /ethyl acetate, 9:1 v/v).

**<sup>1</sup>H NMR (400 MHz, CDCl<sub>3</sub>)** δ= 10.80 (s, 1H), 8.88 (dd, *J* = 4.2, 1.6 Hz, 1H), 8.82 – 8.73 (m, 1H), 8.14 (dd, *J* = 8.3, 1.6 Hz, 1H), 7.88 (dd, *J* = 5.5, 3.0 Hz, 2H), 7.72 (dd, *J* = 5.5, 3.0 Hz, 2H), 7.52 – 7.49 (m, 2H), 7.45 (dd, *J* = 8.3, 4.2 Hz, 1H), 5.95 (d, *J* = 15.9 Hz, 1H), 5.80 (m, 1H), 4.95 (m, 4H), 3.50 – 3.29 (m, 1H), 2.54 (d, *J* = 3.9 Hz, 1H), 2.37 – 2.26 (m, 1H), 1.93 – 1.82 (m, 2H), 1.64 – 1.53 (m, 2H), 1.36 – 1.26 (m, 3H), 1.20 – 1.02 (m, 7H), 0.88 – 0.77 (m, 8H).

**<sup>13</sup>C NMR (101 MHz, CDCl<sub>3</sub>)** δ= 168.30, 167.23, 148.65, 143.63, 138.91, 136.25, 134.51, 134.42, 131.75, 131.65, 131.18, 128.06, 127.38, 123.82, 122.13, 121.73, 117.23, 115.44, 60.10, 35.27, 33.18, 33.04, 31.53, 28.92, 22.59, 21.36, 14.15, 8.50.

**HRMS (ESI)**: calculated for [C<sub>32</sub>H<sub>36</sub>N<sub>3</sub>O<sub>3</sub>]<sup>+</sup> (M+H)<sup>+</sup> *m/z*: 510.2751, found: 510.2755.

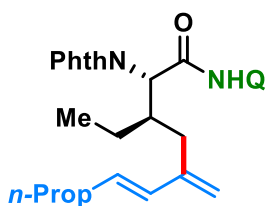

**56**, 60%

**(3R,E)-2-(1,3-dioxisoindolin-2-yl)-3-ethyl-5-methylene-N-(quinolin-8-yl)dec-6-enamide (56)**

The title compound was prepared according to the general procedure as mentioned from (2S,3S)-2-(1,3-dioxisoindolin-2-yl)-3-methyl-N-(quinolin-8-yl)pentanamide **S23** (0.20 mmol 77.5 mg). The crude product was purified *via* flash column chromatography (Hex/EtOAc) to afford a light yellow thick oily of **56** (57.8 mg, 60%).

**R<sub>f</sub>**: 0.13 (hexane /ethyl acetate, 9:1 v/v).

**<sup>1</sup>H NMR (400 MHz, CDCl<sub>3</sub>)** δ= 10.77 (s, 1H), 8.88 (dd, *J* = 4.2, 1.6 Hz, 1H), 8.80 – 8.75 (m, 1H), 8.14 (dd, *J* = 8.3, 1.6 Hz, 1H), 7.88 (dd, *J* = 5.5, 3.0 Hz, 2H), 7.72 (dd, *J* = 5.5, 3.0 Hz, 2H), 7.50 (dd, *J* = 6.4, 2.2 Hz, 2H), 7.44 (dd, *J* = 8.3, 4.2 Hz, 1H), 5.96 (d, *J* = 15.9 Hz, 1H), 5.83 – 5.73 (m, 1H), 4.96 (t, *J* = 5.5 Hz, 3H), 3.45 – 3.32 (m, , 1H), 2.57 (dd, *J* = 13.9, 4.0 Hz, 1H), 2.32 (dd, *J* = 13.9, 10.4 Hz, 1H), 1.94 – 1.83 (m, 2H), 1.61 (ddd, *J* = 14.6, 7.5, 3.5 Hz, 1H), 1.36 – 1.27 (m, 1H), 1.20 – 1.06 (m, 2H), 0.84 (t, *J* = 7.5 Hz, 3H), 0.74 (t, *J* = 7.3 Hz, 3H).

**<sup>13</sup>C NMR (101 MHz, CDCl<sub>3</sub>)** δ= 168.29, 167.20, 148.63, 143.63, 138.89, 136.25, 134.49, 134.40, 131.75, 131.39, 128.04, 127.36, 123.80, 122.12, 121.72, 117.21, 115.44, 60.05, 35.27, 35.08, 33.24, 22.39, 21.39, 13.75, 8.54.

**HRMS (ESI)**: calculated for [C<sub>30</sub>H<sub>32</sub>N<sub>3</sub>O<sub>3</sub>]<sup>+</sup> (M+H)<sup>+</sup> *m/z*: 482.2438, found: 482.2434.

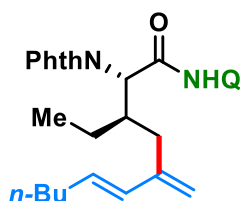

**57**, 58%

**(3*R*,*E*)-2-(1,3-dioxoisindolin-2-yl)-3-ethyl-5-methylene-*N*-(quinolin-8-yl)undec-6-enamide (57)**

The title compound was prepared according to the general procedure as mentioned from (2*S*,3*S*)-2-(1,3-dioxoisindolin-2-yl)-3-methyl-*N*-(quinolin-8-yl)pentanamide **S23** (0.20 mmol 77.5 mg). The crude product was purified via flash column chromatography (Hex/EtOAc) to afford a yellow thick oily of **57** (57.5 mg, 58%).

**R<sub>f</sub>**: 0.14 (hexane /ethyl acetate, 9:1 v/v).

**<sup>1</sup>H NMR (400 MHz, CDCl<sub>3</sub>)** δ= 10.80 (s, 1H), 8.88 (dd, *J* = 4.2, 1.6 Hz, 1H), 8.83 – 8.69 (m, 1H), 8.14 (dd, *J* = 8.3, 1.6 Hz, 1H), 7.88 (dd, *J* = 6.6, 3.3 Hz, 2H), 7.73 (dd, 4H), 7.54 – 7.49 (m, 2H), 7.45 (dd, *J* = 8.3, 4.2 Hz, 1H), 5.96 (d, *J* = 15.9 Hz, 1H), 5.79 (dd, *J* = 14.8, 7.9 Hz, 1H), 4.95 (m, 3H), 3.47 – 3.32 (m, 1H), 2.56 (dd, *J* = 13.9, 4.0 Hz, 1H), 2.32 (dd, *J* = 13.9, 10.4 Hz, 1H), 1.93 – 1.83 (m, 2H), 1.64 – 1.52 (m, 1H), 1.37 – 1.23 (m, 2H), 1.18 – 1.01 (m, 4H), 0.84 (t, *J* = 7.5 Hz, 3H), 0.76 (t, *J* = 7.1 Hz, 3H).

$^{13}\text{C}$  NMR (101 MHz,  $\text{CDCl}_3$ )  $\delta$  = 168.30, 167.23, 148.65, 143.63, 138.91, 136.25, 134.52, 134.41, 131.76, 131.59, 131.19, 128.06, 127.38, 123.81, 122.12, 121.73, 117.23, 115.43, 60.09, 35.29, 33.19, 32.74, 31.35, 22.35, 21.37, 13.98, 8.51.

HRMS (ESI): calculated for  $[\text{C}_{31}\text{H}_{34}\text{N}_3\text{O}_3]^+$  ( $\text{M}+\text{H}$ ) $^+$   $m/z$ : 496.2595, found: 496.2589.

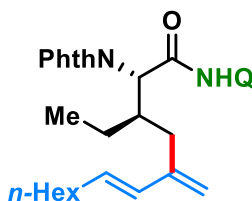

**58**, 70%

**(2*S*,3*R*,*E*)-2-(1,3-dioxoisindolin-2-yl)-3-ethyl-5-methylene-*N*-(quinolin-8-yl)tridec-6-enamide (58)**

The title compound was prepared according to the general procedure as mentioned from (2*S*,3*S*)-2-(1,3-dioxoisindolin-2-yl)-3-methyl-*N*-(quinolin-8-yl)pentanamide **23** (0.20 mmol 77.5 mg). The crude product was purified via flash column chromatography (Hex/EtOAc) to afford a sticky solid **58** (77.31 mg, 70%).

$R_f$ : 0.16 (hexane /ethyl acetate, 9:1 v/v).

$^1\text{H}$  NMR (400 MHz,  $\text{CDCl}_3$ )  $\delta$  = 10.80 (s, 1H), 8.88 (dd,  $J$  = 4.2, 1.7 Hz, 1H), 8.83 – 8.72 (m, 1H), 8.14 (dd,  $J$  = 8.3, 1.7 Hz, 1H), 7.88 (dd,  $J$  = 5.5, 3.0 Hz, 2H), 7.72 (dd,  $J$  = 5.5, 3.0 Hz, 2H), 7.53 – 7.48 (m, 2H), 7.45 (dd,  $J$  = 8.3, 4.2 Hz, 1H), 5.95 (d,  $J$  = 15.9 Hz, 1H), 5.78 (d,  $J$  = 15.8 Hz, 1H), 4.95 (t,  $J$  = 5.6 Hz, 3H), 3.44 – 3.33 (m, 1H), 2.54 (dd,  $J$  = 4.0 Hz, 1H), 2.37 – 2.27 (m, 1H), 1.94 – 1.83 (m, 2H), 1.64 – 1.57 (m, 1H), 1.32 – 1.21 (m, 5H), 1.13 – 1.08 (m, 4H), 0.84 (t,  $J$  = 7.2 Hz, 6H).

$^{13}\text{C}$  NMR (100 MHz,  $\text{CDCl}_3$ )  $\delta$  = 168.17, 167.10, 148.52, 143.51, 138.79, 136.12, 134.38, 134.29, 131.63, 131.53, 131.05, 127.93, 127.25, 123.69, 122.00, 121.60, 117.11, 115.30, 59.97, 35.16, 33.06, 32.95, 31.66, 29.07, 28.87, 22.56, 21.23, 14.10, 8.37.

HRMS (ESI): calculated for  $[\text{C}_{33}\text{H}_{37}\text{N}_3\text{NaO}_3]^+$  ( $\text{M}+\text{Na}$ ) $^+$   $m/z$ : 546.2727, found: 546.2725.

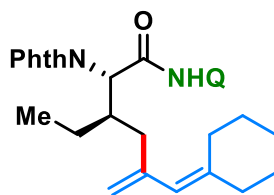

**59**, 68%

**(2*S*,3*R*)-5-(cyclohexylidenemethyl)-2-(1,3-dioxisoindolin-2-yl)-3-ethyl-N-(quinolin-8-yl)hex-5-enamide (59)**

The title compound was prepared according to the general procedure as mentioned from (2*S*,3*S*)-2-(1,3-dioxisoindolin-2-yl)-3-methyl-N-(quinolin-8-yl)pentanamide **23** (0.20 mmol 77.5 mg). The crude product was purified via flash column chromatography (Hex/EtOAc) to afford a light-yellow liq. of **59** (69.0 mg, 68%).

*R<sub>f</sub>*: 0.17 (hexane /ethyl acetate, 9:1 v/v).

**<sup>1</sup>H NMR (400 MHz, CDCl<sub>3</sub>)** δ 10.63 (s, 1H), 8.86 (dd, *J* = 4.2, 1.7 Hz, 1H), 8.80 – 8.67 (m, 1H), 8.13 (dd, *J* = 8.3, 1.7 Hz, 1H), 7.87 (dd, *J* = 5.5, 3.0 Hz, 2H), 7.72 (dd, *J* = 5.5, 3.0 Hz, 2H), 7.50 (d, *J* = 4.5 Hz, 2H), 7.44 (dd, *J* = 8.3, 4.2 Hz, 1H), 5.58 (s, 1H), 5.03 (s, 1H), 4.98 (d, *J* = 10.9 Hz, 1H), 4.80 (s, 1H), 3.21 (d, *J* = 4.5 Hz, 1H), 2.40 (dd, *J* = 4.1 Hz, 1H), 2.32 (dd, *J* = 9.9, 4.7 Hz, 2H), 2.29 – 2.24 (m, 1H), 2.10 – 2.05 (m, 2H), 1.58 – 1.47 (m, 6H), 1.37 – 1.26 (m, 2H), 0.87 (t, *J* = 9.7, 5.3 Hz, 3H).

**<sup>13</sup>C NMR (100 MHz, CDCl<sub>3</sub>)** δ 168.28, 167.02, 148.60, 143.74, 143.17, 138.90, 136.26, 134.43, 134.35, 131.80, 128.03, 127.35, 123.76, 122.75, 122.08, 121.74, 117.14, 115.02, 59.53, 37.95, 37.72, 36.10, 29.96, 28.75, 28.12, 26.90, 21.51, 9.08.

**HRMS (ESI)**: calculated for [C<sub>32</sub>H<sub>34</sub>N<sub>3</sub>O<sub>3</sub>]<sup>+</sup> (*M*+*H*)<sup>+</sup> *m/z*: 508.2595, found: 508.2584.

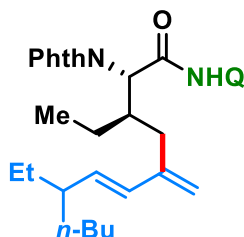

**60**, 66%, dr= 1:1

**(2*S*,3*R*,*E*)-2-(1,3-dioxisoindolin-2-yl)-3,8-diethyl-5-methylene-N-(quinolin-8-yl)dodec-6-enamide(60 dr 1:1)**

The title compound was prepared according to the general procedure as mentioned from (2*S*,3*S*)-2-(1,3-dioxoisindolin-2-yl)-3-methyl-*N*-(quinolin-8-yl)pentanamide **S23** (0.20 mmol 77.5 mg). The crude product was purified via flash column chromatography (Hex/EtOAc) to afford a yellow oily liq. of **60** in **dr 1:1** (71.0 mg, 66%).

*R<sub>f</sub>*: 0.15 (hexane /ethyl acetate, 9:1 v/v).

**<sup>1</sup>H NMR (400 MHz, CDCl<sub>3</sub>)**  $\delta$  10.72 (s, 1H), 8.86 (td, *J* = 4.2, 1.7 Hz, 1H), 8.78 (dd, *J* = 9.0, 4.3 Hz, 1H), 8.13 (dd, *J* = 8.3, 1.5 Hz, 1H), 7.89 (ddd, *J* = 5.4, 3.0, 1.3 Hz, 2H), 7.73 (dd, *J* = 5.5, 3.0 Hz, 2H), 7.53 – 7.47 (m, 2H), 7.44 (ddd, *J* = 8.3, 4.2, 0.7 Hz, 1H), 5.94 (d, *J* = 15.9 Hz, 1H), 5.63 – 5.42 (m, 1H), 4.98 (dt, *J* = 7.9, 3.8 Hz, 3H), 3.42 – 3.29 (m, 1H), 2.63 – 2.51 (m, 1H), 2.41 – 2.24 (m, 1H), 1.83 – 1.73 (m, 1H), 1.66 – 1.59 (m, 1H), 1.33 – 1.21 (m, 6H), 1.19 – 1.04 (m, 5H), 0.89 – 0.81 (m, 7H), 0.76 (t, *J* = 5.6 Hz, 3H).

**<sup>13</sup>C NMR (101 MHz, CDCl<sub>3</sub>)**  $\delta$  168.30, 168.28, 167.28, 167.24, 148.64, 143.76, 138.90, 136.25, 136.01, 135.94, 134.55, 134.54, 134.38, 131.81, 131.79, 131.20, 131.18, 128.04, 127.36, 123.81, 123.79, 122.09, 121.71, 117.21, 115.29, 115.24, 60.00, 59.94, 45.08, 44.94, 35.75, 35.62, 34.61, 33.25, 29.68, 29.55, 28.03, 27.93, 22.91, 21.65, 21.49, 14.24, 14.14, 11.96, 11.83, 8.99, 8.82.

**HRMS (ESI)**: calculated for [C<sub>34</sub>H<sub>40</sub>N<sub>3</sub>O<sub>3</sub>]<sup>+</sup> (*M*+*H*)<sup>+</sup> *m/z*: 538.3064, found: 538.3061.

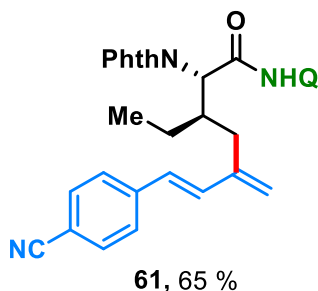

**(2*S*,3*R*,*E*)-7-(4-cyanophenyl)-2-(1,3-dioxoisindolin-2-yl)-3-ethyl-5-methylene-*N*-(quinolin-8-yl)hept-6-enamide (61)**

The title compound was prepared according to the general procedure as mentioned (2*S*,3*S*)-2-(1,3-dioxoisindolin-2-yl)-3-methyl-*N*-(quinolin-8-yl)pentanamide **S23** (0.20 mmol 77.5 mg). The crude product was purified via flash column chromatography (Hex/EtOAc) to afford a sticky solid of **61** (70.3 mg, 65%).

*R<sub>f</sub>*: 0.10 (hexane /ethyl acetate, 9:1 v/v).

**<sup>1</sup>H NMR (400 MHz, CDCl<sub>3</sub>)**  $\delta$  = 10.78 (s, 1H), 8.82 (dd, *J*=5.5, 3.4, 1H), 8.72 (d, *J*=2.9, 1H), 8.13 (d, *J*=7.3, 1H), 7.88 (dd, *J*=5.3, 3.0, 2H), 7.73 (dd, *J*=5.3, 3.0, 2H), 7.56 – 7.50 (m,

2H), 7.44 – 7.31 (m, 3H), 7.10 (d,  $J=8.2$ , 2H), 6.81 – 6.63 (m, 2H), 5.29 (s, 1H), 5.26 (s, 1H), 4.95 (t,  $J=14.8$ , 1H), 3.46 (m, 1H), 2.72 (dd,  $J=13.9$ , 3.2, 1H), 2.46 (dd,  $J=13.8$ , 10.5, 1H), 1.33 – 1.18 (m, 2H), 0.87 (t,  $J=7.4$ , 3H).

$^{13}\text{C}$  NMR (101 MHz,  $\text{CDCl}_3$ )  $\delta$  168.23, 167.12, 148.69, 143.05, 141.95, 138.72, 136.24, 134.53, 134.42, 133.76, 132.13, 131.63, 128.06, 127.60, 127.40, 126.82, 123.87, 122.29, 121.79, 120.99, 119.26, 117.23, 110.11, 59.72, 35.00, 32.71, 21.18, 8.28.

HRMS (ESI): calculated for  $[\text{C}_{34}\text{H}_{29}\text{N}_4\text{O}_3]^+$  ( $\text{M}+\text{H}$ ) $^+$   $m/z$ : 541.2234, found: 541.2226.

## 8. One pot synthesis.

### (i) Typical Procedure for the All-in-One-Pot Synthesis of 3, 27, 32 and 37.

Corresponding acid Chloride (0.1 mmol 1 equiv.), 8-aminoquinoline (0.1 mmol 1 equiv.),  $\text{NaHCO}_3$  (2 equiv.), allenyl acetate (0.15 mmol 1.5 equiv.),  $\text{Pd}(\text{OAc})_2$  (10 mol %) and Toluene (2 mL) were added to an oven-dried reaction tube equipped with a stir bar. The reaction mixture was stirred at 90 °C for 12 h. After completing reaction, the resulting mixture was cooled to room temperature, filtered through cotton wool, washed with ethyl acetate and the filtrate was concentrated under reduced pressure. The residue was purified by column chromatography (silica gel, mesh 100-200; hexane: ethyl acetate; 80:20) to give desire the product.

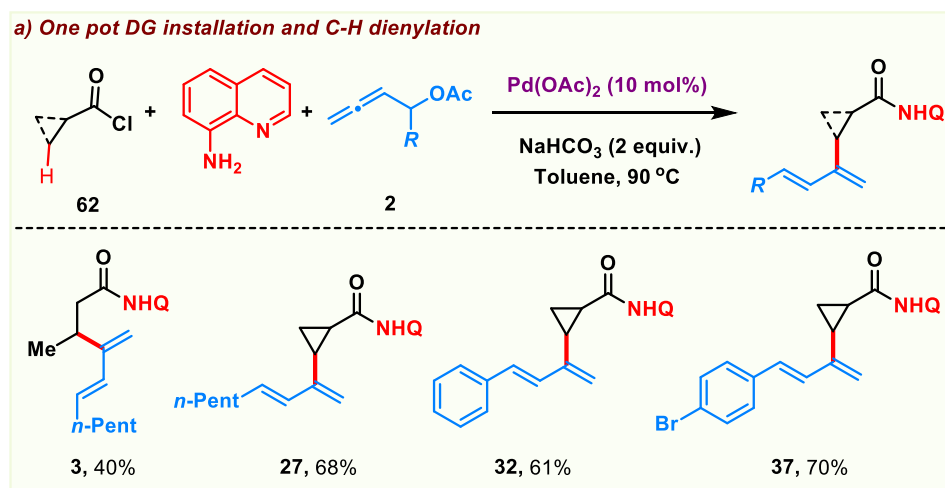

### (ii) Typical Procedure for the All-in-One-Pot Synthesis of 3j.

To an oven dried screw-cap reaction tube equipped with a magnetic stir bar were added  $\text{Pd}(\text{OAc})_2$  (2.2 mg, 0.01 mmol), alkene (21.2 mg, 0.1 mmol), phenyl boronic acid (0.2 mmol),  $\text{NaF}$  (8.4 mg, 0.2 mmol), and benzotrifluoride (1.0 mL). The vial was sealed with screw cap and placed in a pre-heated oil bath at 100 °C. After 10 h, the reaction was brought to room temperature, and added allenyl acetate (0.15 mmol) followed by continue the reaction at the



same temperature for 10-12 h. Later completing reaction, the resulting mixture was cooled to room temperature, filtered through cotton wool, washed with ethyl acetate and the filtrate was concentrated under reduced pressure. The residue was purified by column chromatography (silica gel, mesh 100-200; hexane: ethyl acetate; 80:20) to give the desire product.

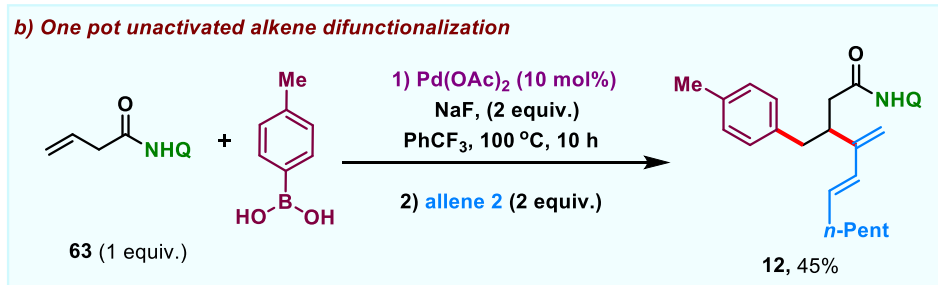

## 9. Gram scale reaction and further functionalization's.

### (i) Gram scale reaction.

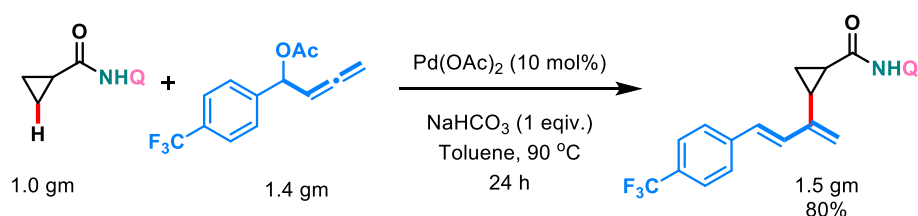

An oven dried Schlenk was charged with Teflon coated magnetic stir bar under argon atmosphere added **4a** *N*-(quinolin-8-yl)cyclopropanecarboxamide (1.0 g, 4.7 mmol, 1.0 eq),  $\text{Pd(OAc)}_2$  (10 mol%), and followed by toluene (30 mL). Subsequently added sodium bicarbonate (1.0 equiv.) and **2x** 1-(4-(trifluoromethyl)phenyl)buta-2,3-dien-1-yl acetate (1.2 eq, 5.6 mmol, 1.45 g). The closed Schlenk tube containing reaction mixture were placed in preheated oil bath at  $90^\circ\text{C}$  for 24 hours. The reaction mixture was allowed to cool to room temperature after above mentioned time. Removal of solvent followed by column chromatography on silica gel afforded dienylated product **7a** with 80% (1.5 g)

## (ii) Functionalization:

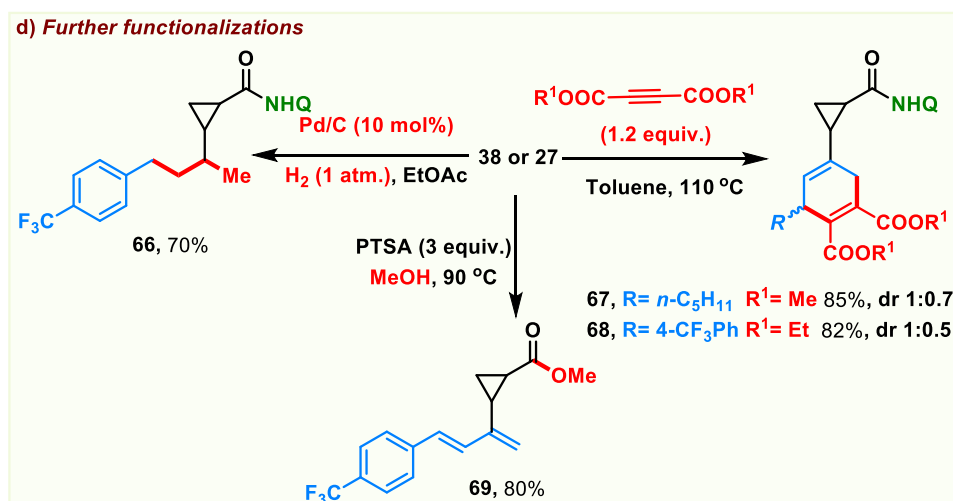

### a. Hydrogenation of (*N*-(quinolin-8-yl)-2-((*E*)-4-(4-(trifluoromethyl)phenyl)buta-1,3-dien-2-yl)cyclopropane-1-carboxamide (38)

To a solution of **38** (*E*)-*N*-(quinolin-8-yl)-2-(4-(4-(trifluoromethyl)phenyl)buta-1,3-dien-2-yl)cyclopropane-1-carboxamide (0.10 mmol 40.8 mg) in EtOAc (3 mL) was added Pd/C (10 wt.%, 0.0267mmol) and H<sub>2</sub> gas was bubbled from a balloon at room temperature. After 2 h, mixture was filtered through a pad of celite and washed with EtOAc (10 mL) and diethyl ether (10 mL). The combined organic phase was dried with Na<sub>2</sub>SO<sub>4</sub>. After removal of the solvent under reduced pressure, the residue was purified by column chromatography (silica gel mesh100-200; hexane: ethyl acetate; (95:05) to give the desire product yellow liq. (28.9 mg, 70%yield).

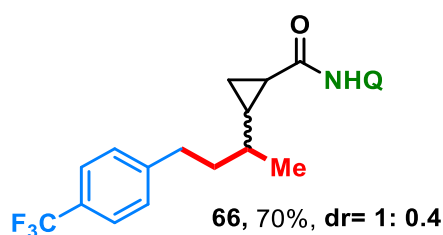

### *N*-(quinolin-8-yl)-2-(4-(4-(trifluoromethyl)phenyl)butan-2-yl)cyclopropane-1-carboxamide (66)

Yield= 70%, 28.9 mg

*R<sub>f</sub>*: 0.3 (hexane /ethyl acetate, 9:1 v/v).

<sup>1</sup>H NMR (500 MHz, CDCl<sub>3</sub>) δ = 10.08 (s, 1H), 8.85 (dd, *J*=4.2, 1.6, 1H), 8.79 (d, *J*=8.3, 1H), 8.19 (dd, *J*=8.2, 1.3, 1H), 7.57 – 7.52 (m, 4H), 7.51 – 7.48 (m, 2H), 7.34 (d, *J*=7.9, 2H),

2.79 (dd,  $J=10.1, 5.0$ , 1H), 1.96 (td,  $J=8.2, 5.4$ , 1H), 1.86 – 1.82 (m, 1H), 1.71 – 1.65 (m, 2H), 1.32 – 1.28 (m, 2H), 1.19 – 1.15 (m, 2H), 1.01 (d,  $J=6.3$ , 3H).

$^{13}\text{C}$  NMR (126 MHz,  $\text{CDCl}_3$ )  $\delta$  170.48, 148.22, 148.05, 147.48, 138.39, 136.53, 134.97, 128.71, 128.55, 128.15, 127.64, 127.50, 127.42, 126.35, 125.38, 125.35, 124.89, 121.71, 121.61, 121.40, 121.27, 116.38, 39.58, 33.90, 31.74, 29.41, 21.24, 20.69, 12.97.

HRMS (ESI): calculated for  $[\text{C}_{24}\text{H}_{24}\text{F}_3\text{N}_2\text{O}]^+$ ,  $(\text{M}+\text{H})^+$   $m/z$ : 413.1835; Found=413.1846

**b. Diels-alder reaction.** To a solution of the synthesized **27** (0.1 mmol) in toluene (1 mL) was added the dienophile dimethyl but-2-ynedioate or diethyl but-2-ynedioate (0.15 mmol, 1.5 equiv). The reaction was stirred at 120 °C for 12 h. The reaction mixture was subjected to flash column chromatography to afford the titled product **67** and **68**.

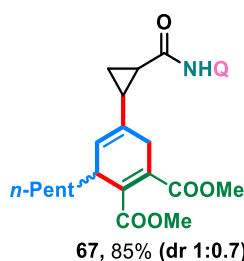

**dimethyl 3-pentyl-5-(2-(quinolin-8-ylcarbamoyl)cyclopropyl)cyclohexa-1,4-diene-1,2-dicarboxylate(67)**

Yield= 85%, 40.5 mg

$R_f$ : 0.3 (hexane /ethyl acetate, 9:1 v/v).

$^1\text{H}$  NMR (500 MHz,  $\text{CDCl}_3$ )  $\delta$  9.92 (s,  $J = 6.9$  Hz, 1H), 8.83 (s,  $J = 45.0$  Hz, 1H), 8.71 (dd,  $J = 7.3, 4.3$  Hz, 1H), 8.18 (d,  $J = 8.2$  Hz, 1H), 7.60 – 7.41 (m, 3H), 5.71 – 5.53 (m, 1H), 3.82 – 3.59 (m, 6H), 3.21 – 2.82 (m, 2H), 2.17 (ddd,  $J = 16.7, 14.1, 8.2$  Hz, 1H), 2.07 – 1.85 (m, 1H), 1.71 – 1.62 (m, 2H), 1.48 – 1.39 (m, 1H), 1.38 – 1.31 (m, 1H), 1.25 – 1.11 (m, 4H), 1.10 – 1.03 (m, 2H), 0.85 – 0.71 (m, 3H).

$^{13}\text{C}$  NMR (125 MHz,  $\text{CDCl}_3$ )  $\delta$  169.60, 168.68, 168.03, 167.90, 167.48, 167.46, 148.19, 140.37, 140.04, 138.37, 136.49, 134.79, 129.84, 129.72, 129.02, 128.84, 128.09, 127.62, 127.56, 125.60, 124.51, 121.66, 121.23, 116.61, 116.48, 52.17, 52.12, 39.10, 38.82, 34.13, 33.98, 32.08, 32.01, 31.55, 31.30, 26.13, 25.13, 24.77, 24.06, 23.79, 22.55, 22.48, 14.28, 14.14, 10.13, 9.16.

HRMS (ESI): calculated for  $[\text{C}_{28}\text{H}_{33}\text{N}_2\text{O}_5]^+$ ,  $(\text{M}+\text{H})^+$   $m/z$ : 477.2384; Found=477.2390

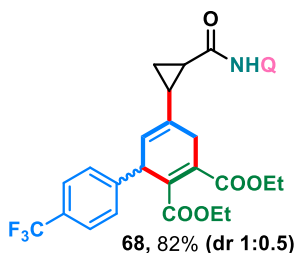

**diethyl 5-(2-(quinolin-8-ylcarbamoyl)cyclopropyl)-4'-(trifluoromethyl)-1,4-dihydro-[1,1'-biphenyl]-2,3-dicarboxylate (68)**

Yield= 82%, 47.4 mg

$R_f$ : 0.3 (hexane /ethyl acetate, 9:1 v/v).

$^1\text{H}$  NMR (400 MHz,  $\text{CDCl}_3$ )  $\delta$  9.99 – 9.82 (m, 1H), 8.80 – 8.59 (m, 2H), 8.20 – 8.08 (m, 1H), 7.59 – 7.47 (m, 2H), 7.45 – 7.39 (m, 1H), 7.30 – 7.19 (m, 4H), 5.78 – 5.53 (m, 1H), 4.51 – 4.36 (m, 1H), 4.20 – 4.07 (m, 2H), 3.99 – 3.86 (m, 2H), 3.44 – 2.91 (m, 2H), 2.23 – 2.13 (m, 1H), 2.09 – 1.93 (m, 1H), 1.68 – 1.57 (m, 1H), 1.23 – 1.16 (m, 4H), 0.96 – 0.90 (m, 3H).

$^{13}\text{C}$  NMR (100 MHz,  $\text{CDCl}_3$ )  $\delta$  168.50, 167.93, 167.67, 167.43, 167.35, 167.09, 148.22, 148.15, 145.72, 145.20, 138.32, 138.29, 136.53, 135.45, 134.66, 134.56, 131.87, 130.74, 129.32, 129.17, 129.02, 128.96, 128.09, 128.06, 127.53, 127.46, 125.27, 125.24, 125.01, 123.27, 121.69, 121.62, 121.54, 121.49, 116.58, 116.46, 61.32, 60.97, 60.90, 45.40, 45.19, 31.75, 31.49, 29.80, 25.77, 25.62, 23.90, 23.84, 22.79, 14.21, 14.02, 13.69, 9.98, 9.49.

HRMS (ESI): calculated for  $[\text{C}_{32}\text{H}_{30}\text{F}_3\text{N}_2\text{O}_5]^+$ ,  $(\text{M}+\text{H})^+$   $m/z$ : 579.2109; Found=579.2115.

**c. Removal of DG**

In an oven dried reaction tube 0.10 mmol 40.8 mg of **5n** (*E*)-*N*-(quinolin-8-yl)-2-(4-(4-(trifluoromethyl)phenyl)buta-1,3-dien-2-yl)cyclopropane-1-carboxamide was taken. Then 3 equiv. *p*-toluenesulphonic acid and 3 mL methanol was added to it. The mixture was stirred in a preheated oil bath at 90 °C for 12 hours. After completion reaction was cooled to room temperature, filtered through celite and evaporated under vacuum. Pure product was isolated by column chromatography through a silica gel column (mesh 100- 200). Eluent: ethyl acetate / petroleum ether (2:98 v/v); light yellow liquid; isolated yield (24.0 mg, 80%).

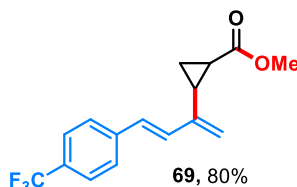

**methyl 2-((E)-4-(4-(trifluoromethyl)phenyl)buta-1,3-dien-2-yl)cyclopropane-1-carboxylate (69)**

$R_f$ : 0.30 (hexane /ethyl acetate, 9:1 v/v).

**$^1\text{H}$  NMR (400 MHz,  $\text{CDCl}_3$ )**  $\delta$  = 7.55 (dd,  $J$ =10.4, 5.5, 2H), 7.52 (dd,  $J$ =11.8, 5.3, 2H), 6.92 (d,  $J$ =16.2, 1H), 6.79 (d,  $J$ =16.3, 1H), 5.43 (s, 1H), 5.33 (s, 1H), 3.51 (s, 3H), 2.14 (dd,  $J$ =7.9, 6.6, 2H), 1.55 – 1.46 (m, 1H), 1.33 – 1.28 (m, 1H).

**$^{13}\text{C}$  NMR (100 MHz,  $\text{CDCl}_3$ )**  $\delta$  171.71, 140.98, 140.88 (q,  $J$  = 6.3 Hz), 133.22, 130.94 (q,  $J$  = 290 Hz), 129.06 (q,  $J$  = 22 Hz), 127.52, 126.69, 125.68 (q,  $J$  = 3.7 Hz), 121.40, 51.73, 23.07, 20.08, 11.07.

**HRMS (ESI):** calculated for  $[\text{C}_{16}\text{H}_{16}\text{F}_3\text{O}_2]^+$ ,  $(\text{M}+\text{H})^+$   $m/z$ : 297.1097; Found=297.1098.

## 10. Mechanistic studies

### 1. Isolation of palladium complexes.

#### a. General Procedure for synthesis of Pd(II) Complex **70**.

To a 15 mL sealed-tube were added amide **S18** (1.0 equiv.),  $\text{Pd}(\text{OAc})_2$  (1.0 equiv.), and  $\text{CH}_3\text{CN}$  (2 mL). The tube was sealed and kept at r.t for 1h. The reaction mixture concentrated on rotavapor under reduced pressure. Then the palladium complex **70** were purified by washing with mixture of 1:1 ethyl acetate and hexane or recrystallization in DCM.

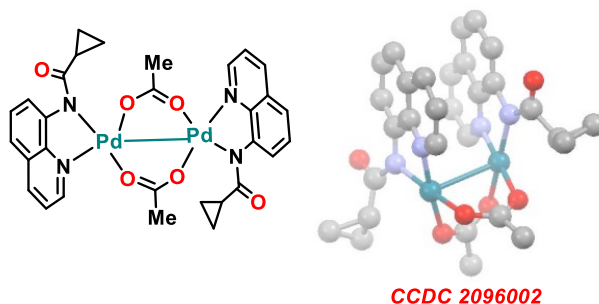

**$^1\text{H}$  NMR (500 MHz,  $\text{CD}_3\text{CN}$ )**  $\delta$  8.80 (dd,  $J$  = 7.9, 1.2 Hz, 1H), 8.52 (dd,  $J$  = 4.7, 1.6 Hz, 1H), 8.35 (dd,  $J$  = 8.4, 1.6 Hz, 1H), 7.52 – 7.44 (m, 2H), 7.36 (dd,  $J$  = 8.1, 1.2 Hz, 1H), 2.00 (s, 6H), 1.97 (m, 1H), 1.71 (ddd,  $J$  = 9.0, 6.1, 3.2 Hz, 1H), 0.96 (td,  $J$  = 4.5, 3.1 Hz, 1H), 0.87 (ddd,  $J$  = 8.7, 7.5, 4.4 Hz, 1H), 0.79 (ddd,  $J$  = 7.6, 6.1, 4.8 Hz, 1H).

**$^{13}\text{C}$  NMR (100 MHz,  $\text{CD}_3\text{CN}$ )**  $\delta$  171.93, 146.95, 144.61, 138.26, 129.93, 128.55, 121.26, 119.24, 118.39, 26.53, 19.79, 18.03.

#### b. General Procedure for synthesis of Pd(II) Complex **71**.<sup>5</sup>

To a 15 mL sealed-tube were added amide **S19** (1.0 equiv.),  $\text{Pd}(\text{OAc})_2$  (1.0 equiv.), and  $\text{CH}_3\text{CN}$  (2 mL). The tube was sealed and heated at 60 °C for 12h. The reaction mixture was cooled to RT and concentrated on rotavapor under reduced pressure. Then the palladium complex **71** were purified by washing twice with mixture of 1:1 ethyl acetate and hexane or recrystallization in DCM.

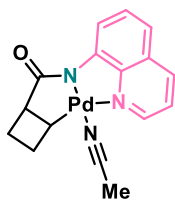

**<sup>1</sup>H NMR (500 MHz, CD<sub>3</sub>CN)** δ 8.94 (dd, *J* = 7.8, 1.0 Hz, 1H), 8.54 (dd, *J* = 4.6, 1.6 Hz, 1H), 8.36 (dd, *J* = 8.4, 1.5 Hz, 1H), 7.53 – 7.43 (m, 2H), 7.39 (dd, *J* = 8.0, 0.9 Hz, 1H), 3.14 (dd, *J* = 14.8, 7.4 Hz, 1H), 2.94 (ddd, *J* = 10.4, 5.0, 2.6 Hz, 1H), 2.53 – 2.37 (m, 4H), 1.99 (s, *J* = 1.7 Hz, 3H).

**<sup>13</sup>C NMR (125 MHz, CD<sub>3</sub>CN)** δ 188.57, 171.77, 147.21, 144.86, 138.15, 129.86, 128.44, 121.29, 119.62, 118.60, 53.63, 28.26, 27.52, 24.91, 19.79.

#### c. General Procedure for synthesis of Pd(II) Complex 72.<sup>5</sup>

To a 15 mL sealed-tube were added amide **S19** (1.0 equiv.), Pd(OAc)<sub>2</sub> (1.0 equiv.), pyridine (2.0 equiv.) and CH<sub>3</sub>CN (2 mL). The tube was sealed and heated at 60 °C for 8 hrs. The reaction mixture was cooled to RT and concentrated on rotavapor under reduced pressure. Then the palladium complex **72** were purified by washing twice with mixture of 1:1 ethyl acetate and hexane or recrystallization in DCM.

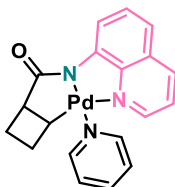

**<sup>1</sup>H NMR (400 MHz, CDCl<sub>3</sub>)** δ 9.17 (d, *J* = 7.3 Hz, 1H), 8.82 (m, 2H), 8.10 (d, *J* = 7.7 Hz, 1H), 7.90 (d, *J* = 6.6 Hz, 1H), 7.80 (s, 1H), 7.47 (m, 3H), 7.22 (d, *J* = 6.9 Hz, 2H), 3.40 (d, *J* = 6.8 Hz, 1H), 2.77 (s, 1H), 2.57 (d, *J* = 7.3 Hz, 2H), 1.98 – 1.76 (m, 2H).

**<sup>13</sup>C NMR (100 MHz, CDCl<sub>3</sub>)** δ 189.24, 151.69, 146.11, 145.49, 145.38, 137.82, 137.57, 129.71, 128.84, 125.72, 120.98, 120.59, 118.57, 54.04, 27.81, 27.38, 26.68.

#### d. General Procedure for synthesis of Pd(II) Complex 73.<sup>5</sup>

To a 15 mL sealed-tube were added amide **S20** (1.0 equiv.), Pd(OAc)<sub>2</sub> (1.0 equiv.), pyridine (2.0 equiv.) and CH<sub>3</sub>CN (2 mL). The tube was sealed and heated at 60 °C for 12h. The reaction mixture was cooled to RT and concentrated on rotavapor under reduced pressure. Then the palladium complex **73** were purified by washing twice with mixture of 1:1 ethyl acetate and hexane or recrystallization in DCM.

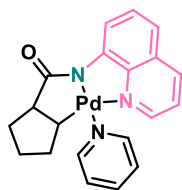

**<sup>1</sup>H NMR (400 MHz, CDCl<sub>3</sub>)** δ 9.15 (d, *J* = 7.9 Hz, 1H), 8.89 (d, *J* = 4.9 Hz, 2H), 8.06 (d, *J* = 8.2 Hz, 1H), 7.87 (t, *J* = 7.5 Hz, 1H), 7.72 (d, *J* = 4.1 Hz, 1H), 7.45 (dd, *J* = 12.9, 6.8 Hz, 3H), 7.21 – 7.13 (m, 2H), 3.13 (dd, *J* = 15.9, 8.5 Hz, 1H), 2.35 (dd, *J* = 14.4, 7.6 Hz, 1H), 2.09 – 1.96 (m, 1H), 1.97 – 1.88 (m, 1H), 1.79 – 1.66 (m, 1H), 1.37 (td, *J* = 14.1, 6.8 Hz, 2H), 1.23 (dt, *J* = 12.6, 6.2 Hz, 1H).

**<sup>13</sup>C NMR (100 MHz, CDCl<sub>3</sub>)** δ 188.83, 152.10, 146.73, 145.34, 145.05, 137.83, 137.52, 129.85, 129.18, 125.70, 121.04, 120.51, 118.23, 57.62, 34.07, 32.55, 29.31, 26.22.

#### d. General Procedure for The Competitive Rate Determination Of Pd(II) Complex **72** and **73**.

In an oven dried reaction tube, charged with magnetic stir-bar, **S19** (0.05 mmol), **S20** (0.05 mmol), and Pd(OAc)<sub>2</sub> (1.0 mmol, 1.0 equiv.), were added under air. Then CH<sub>3</sub>CN (1 mL) was added into the reaction tube. The reaction tube was capped and the reaction mixture was allowed to stir at 60 °C for 20 min. After completion of the reaction, reaction mixture was cooled to room temperature and evaporated under reduced pressure. The <sup>1</sup>H NMR of crude reaction mixture was recorded which suggesting that the intermediate **72** formation rate is faster than **73**. Integration of highest de-shielded proton of both intermediate provided the ratio of the intermediate **72**:**73** is 1:0.3.

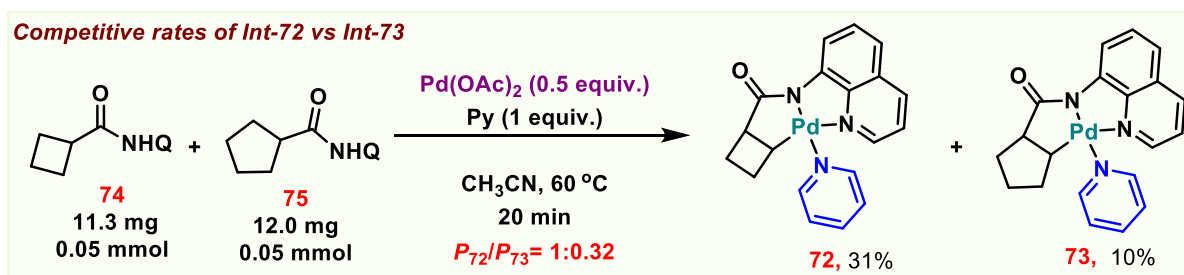

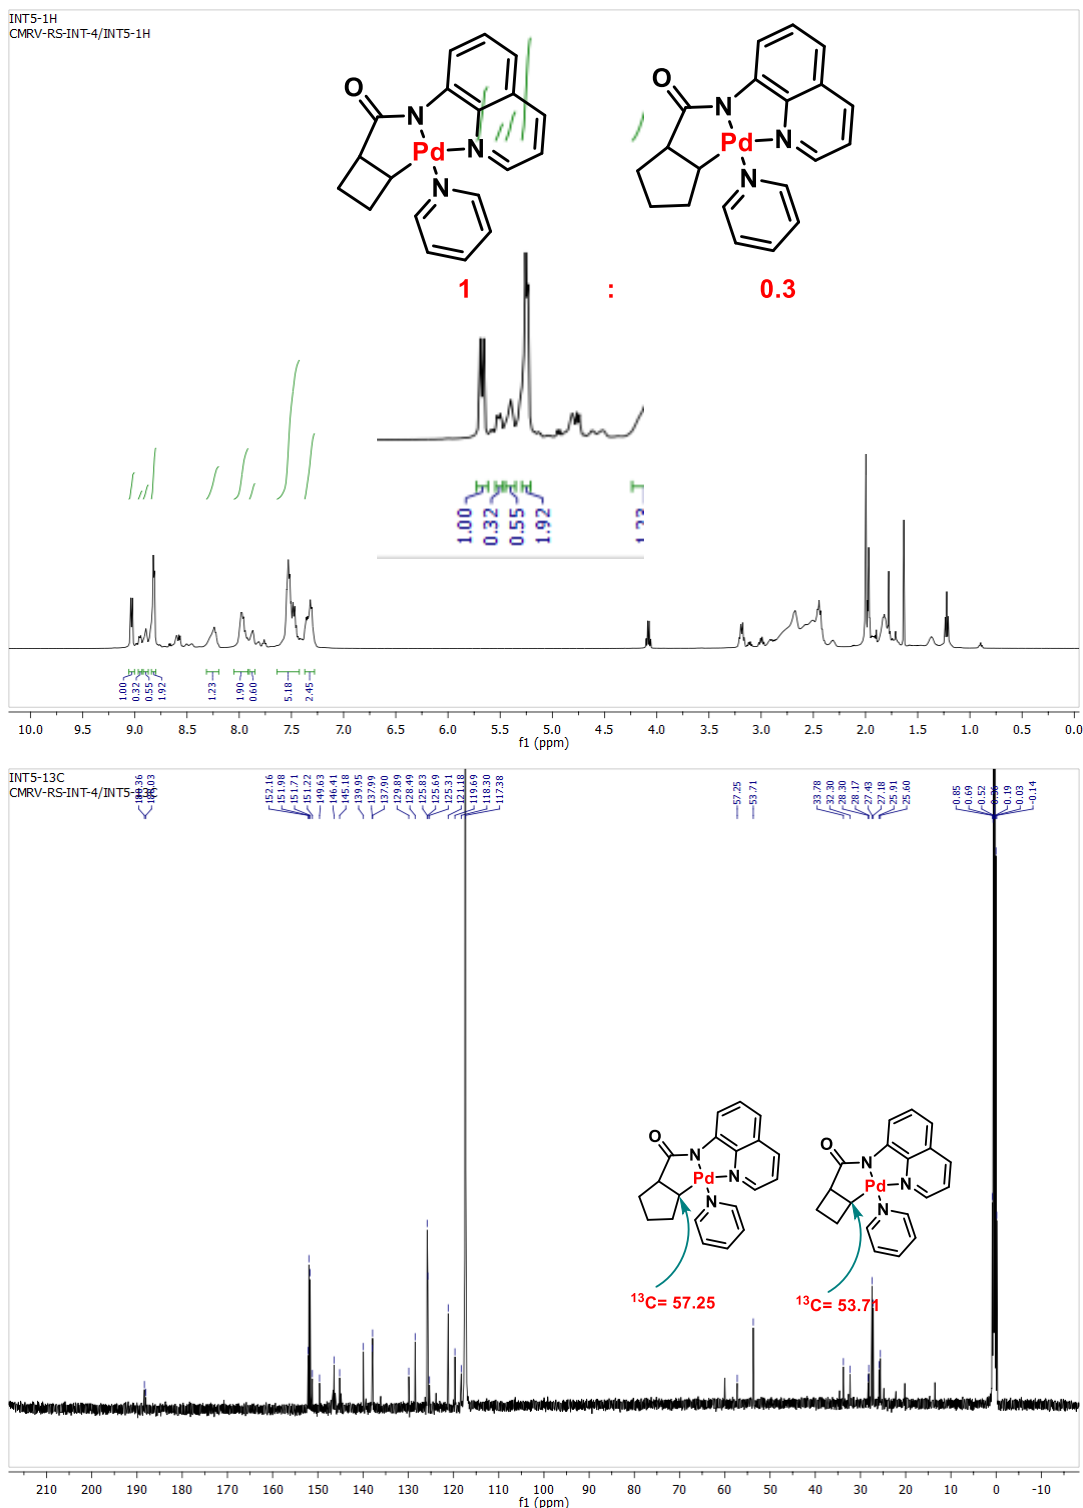

### b. Dienylation of $sp^3$ C-H bond by using isolated intermediates.

An oven dried Schlenk was charged with Teflon coated magnetic stir bar under argon atmosphere added the dimeric intermediate **70** (1.0 equiv.), and followed by allenyl acetate **2** in toluene (1 mL). The closed Schlenk tube containing reaction mixture were placed in preheated oil bath at 90°C for 24 hours. The reaction mixture was allowed to cool to room temperature after above mentioned time. Removal of solvent followed by column



chromatography on silica gel afforded dienylated product **27** with 88% yield. Same procedure used for the dienylation of intermediate **72** and afforded the desired product in 68%.

**d. Stoichiometric reaction of Int-72 and Int-70 and allenyl acetate**

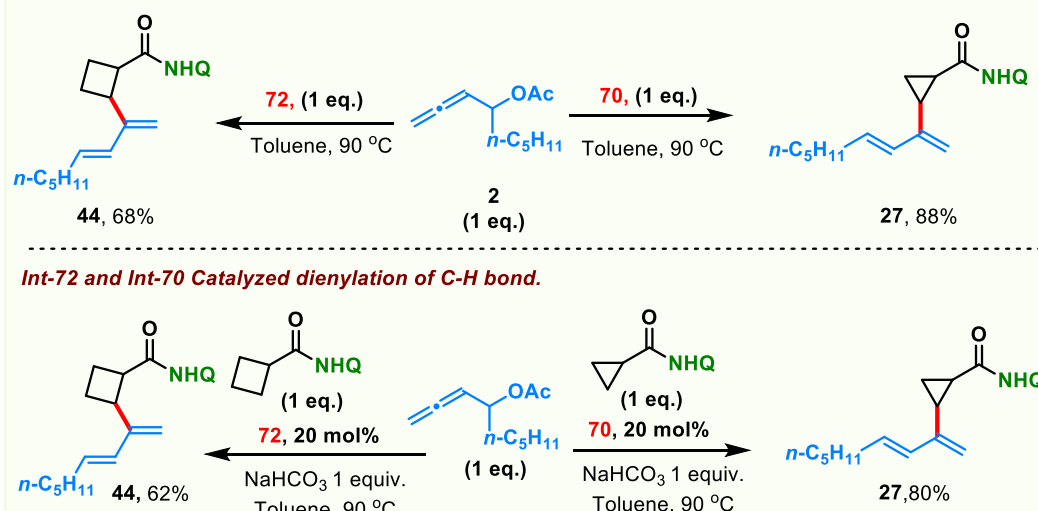

Further we used these intermediate in catalytic amount for the C-H dienylation to check its chemically and kinetically compatible with the reaction. The procedure is given here, To an oven dried screw-cap reaction tube equipped with stir bar, were added amide (0.1 mmol), freshly prepared allenyl acetate **2** (0.12 mmol), Intermediate **70** or **72** (20 mol%) and NaHCO<sub>3</sub> (0.1 mmol) followed by dry Toluene (1.0 mL). The reaction mixture was heated for 24 h at 90 °C. Upon completion as detected by TLC. The organic phase was evaporated under reduced pressure and the product was separated by using silica-gel column chromatography afforded dienylated product in 80% and 62% yield.

**c. Probing the impact of base in reaction condition.**

**Study on the role of base:** In screw cap reaction tubes with previously placed stir bars were charged with *N*-(quinolin-8-yl)cyclopentanecarboxamide **S20** (0.05 mmol 12 mg), palladium complex **71** (20.5 mg, 0.05 mmol) and sodium bicarbonate (4.2 mg, 0.05 mmol). The caps were fitted with a rubber septum and acetonitrile (1 mL) was added to this mixture by syringe under nitrogen atmosphere. The reaction mixture was vigorously stirred (600 rpm on Heidolph MR Hei-Standard stirrer) in a preheated oil bath of 60 °C for 4 h. Mass was taken from the reaction mixture and found 372.0337 along with 386.0482 peak in mass spectrometer. Following the same procedure in absence of sodium bicarbonate, the mass peak at 386.0482 was not observed.

**c. Probing Base-Assisted Reversible C-H Activation**

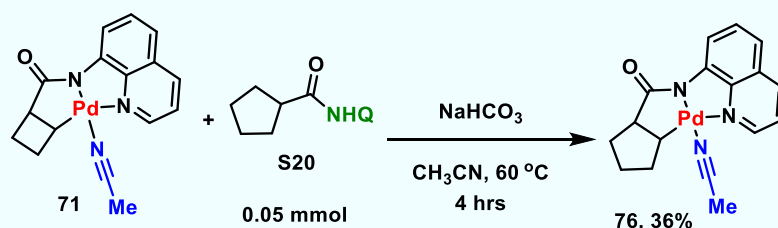

**User Spectrum Plot Report**

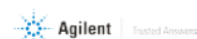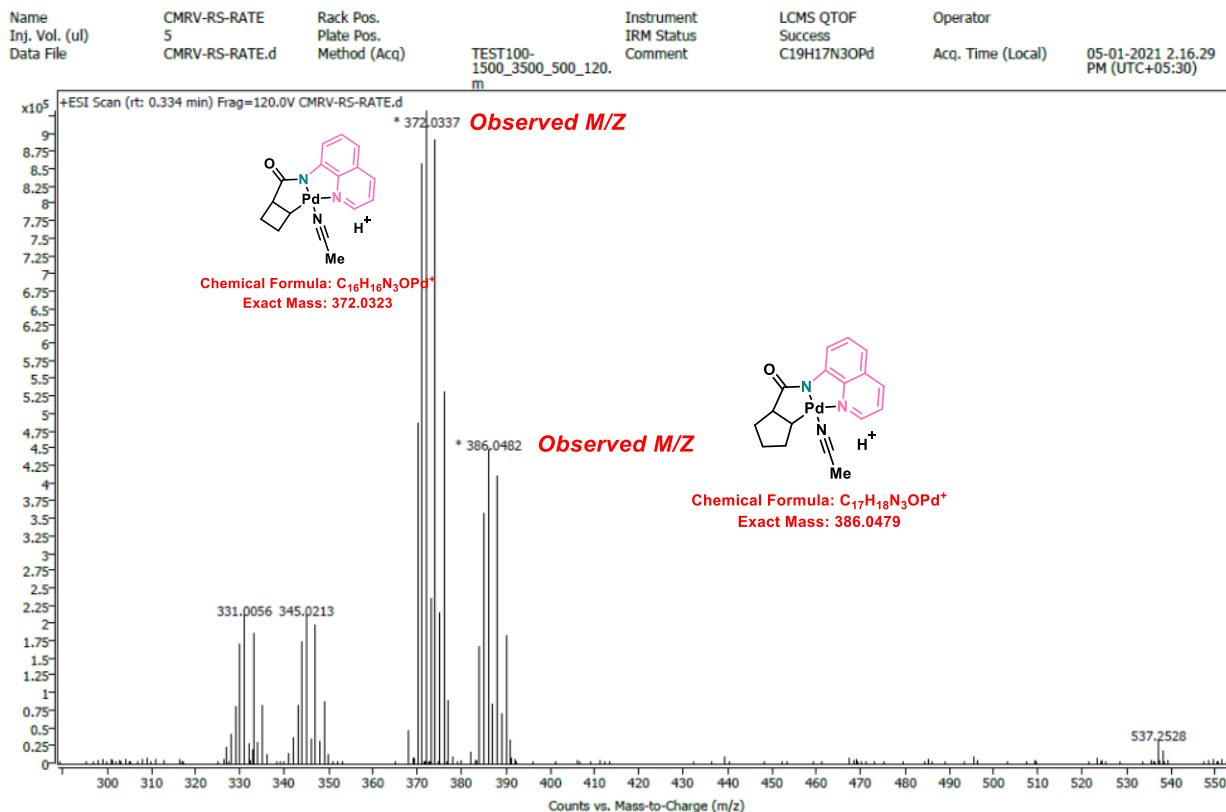

Page 1 of 1

Generated at 03:33 PM on 05-01-2021

**e. Radical Scavenger Experiment**

To an oven dried screw-cap reaction tube equipped with stir bar, were added amide (1 equiv.), TEMPO (equiv.), allenyl acetate (1.5 equiv.),  $\text{Pd}(\text{OAc})_2$  (10 mol%) and  $\text{Na}_2\text{CO}_3$  (2 equiv.) followed by dry 1,4-dioxane (1 mL). The reaction mixture was heated overnight at  $90^\circ\text{C}$ . Upon completion as detected by TLC, the work up of the reaction mixture was done in ethyl acetate- water solvent mixture system. The organic phase was evaporated under reduced pressure and then the product was purified on flash silica gel chromatography afforded 68%

yield. This experiment clearly suggesting that reaction is not proceeding with any radical step.

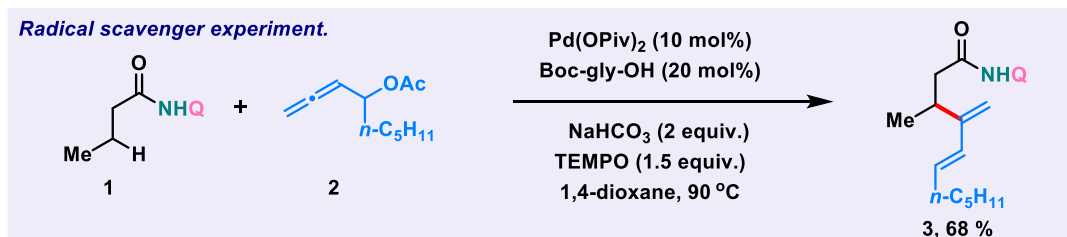

#### f. Preparation of deuterated substrate 1[D]

The solution of **1** (2.14 g, 10 mmol, 1 equiv.) and  $\text{Pd(OAc)}_2$  (224.5 mg, 1 mmol, 0.1 equiv.) in deuterated acetic acid (10 mL) was heated at 90 °C for 24 hours. After completion the reaction was filtrated and concentrated, then the product was purified on flash silica gel chromatography (PE : EtOAc = 20:1). This procedure was repeated twice, giving 1.52 g of deuterated substrate **1[D]** in 70% yield.

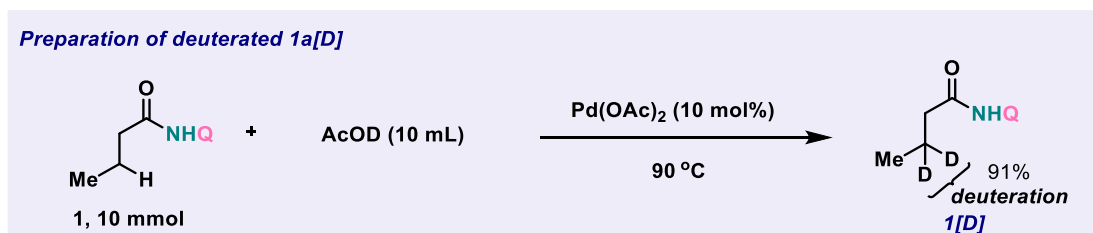

$^1\text{H}$  NMR (400 MHz,  $\text{CDCl}_3$ )  $\delta$  9.80 (s, 1H), 8.80 (m, 1.1 H), 8.19 – 8.11 (m, 1H), 7.56 – 7.47 (m, 1.24H), 7.45 (dd,  $J$  = 8.2, 4.2 Hz, 0.78H), 2.53 (s, 2H), 1.84 (0.18H), 1.05 (s, 2H).

$^{13}\text{C}$  NMR ( $\text{CDCl}_3$ , 100 MHz, ppm)  $\delta$  171.8, 148.1, 138.3, 136.4, 134.6, 127.9, 127.5, 121.6, 121.3, 116.4, 40.0, 18.6, 13.6

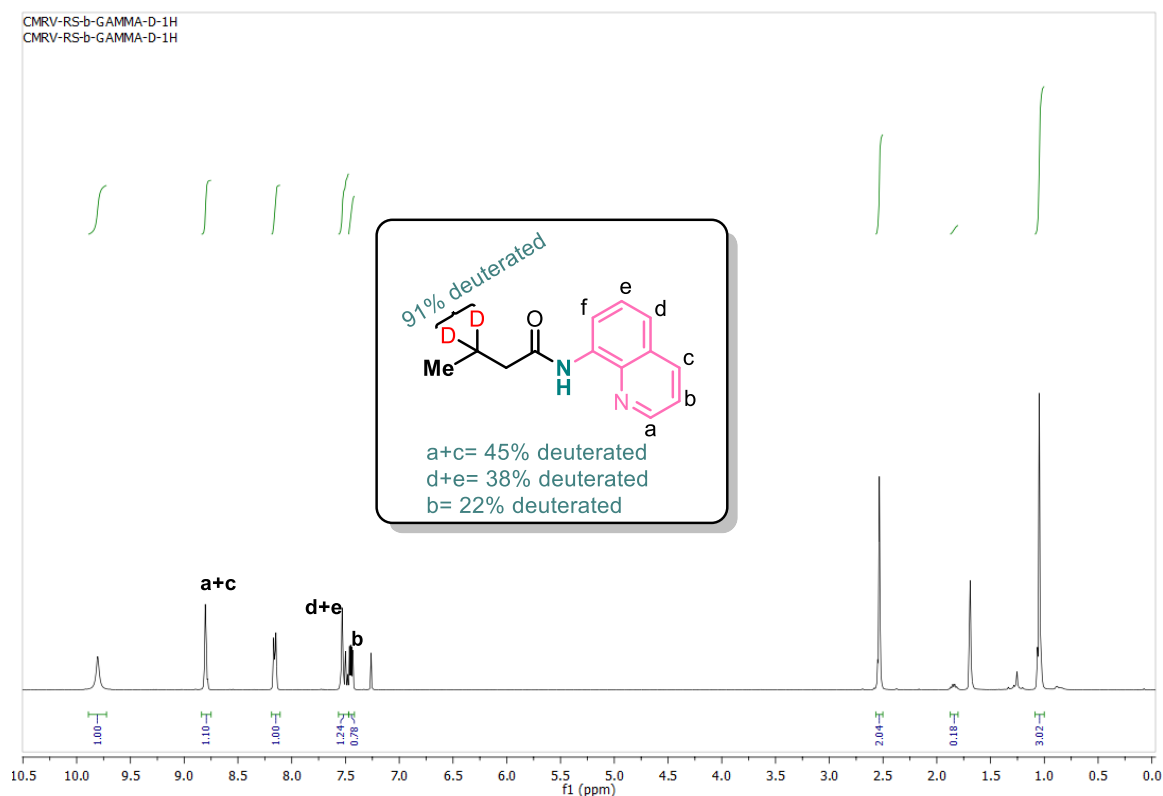

#### g. Parallel KIE

Kinetic isotope effect (KIE) of the dienylation of substrate **1** and deuterated **1-D** with **2** under standard condition **A**. Substrate **1-H** or **1-D** was subjected to the dienylation reaction with allenyl acetate under the general reaction condition **A** for 10, 25, 40, 55, and 75 min in different reaction tubes. Data was collected at 10, 25, 40, 55, and 75 min, Data collecting method: at specified reaction time, the reaction vial was quenched and isolated by silica gel flash chromatography. Average data of repeating experiments were used.  $K_H/K_D$  ( $\sim 1.47$ ) was estimated based on the ratio of dienylation yield.

| <i>Time/Mins</i> | <i>1-H Yield</i> | <i>1-D yield</i> |
|------------------|------------------|------------------|
| 10               | 12               | 7                |
| 25               | 23               | 15               |
| 40               | 33               | 22               |
| 55               | 45               | 28               |
| 75               | 52               | 35               |

### Kinetic Isotopic Effect

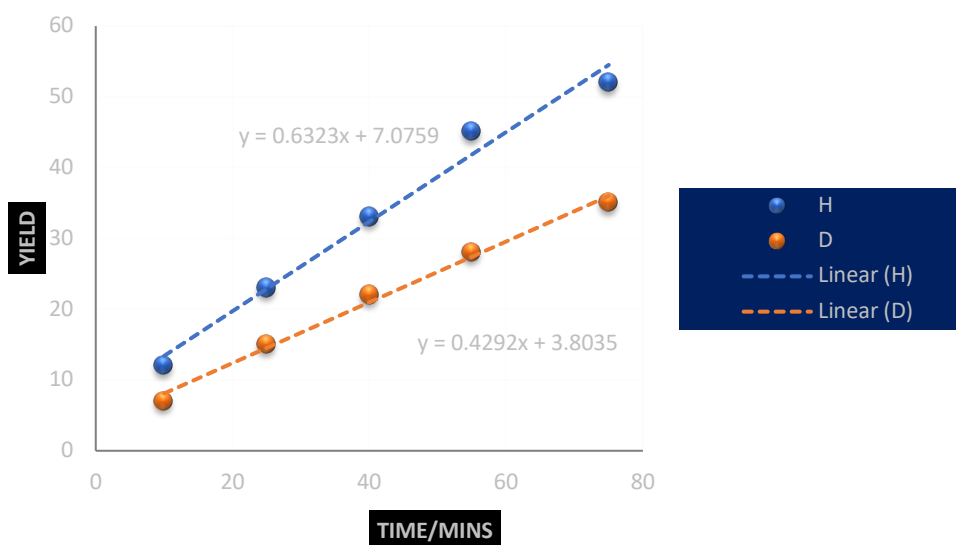

### KIE with labeled D-1 and 1

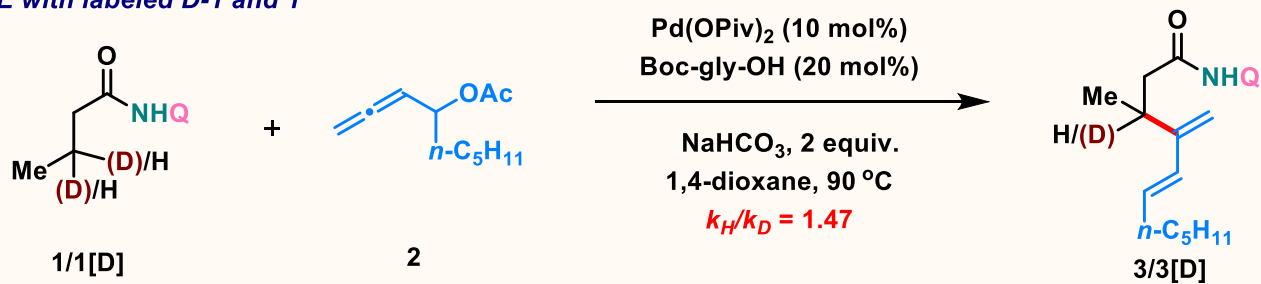

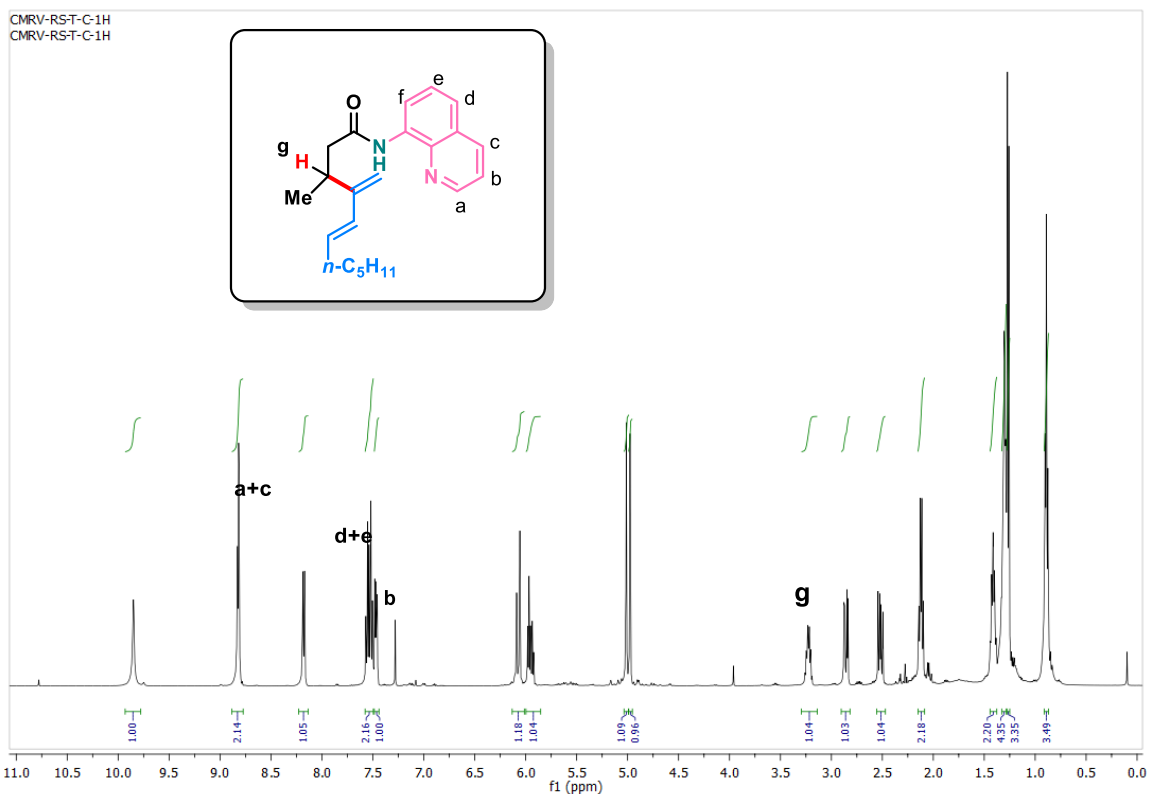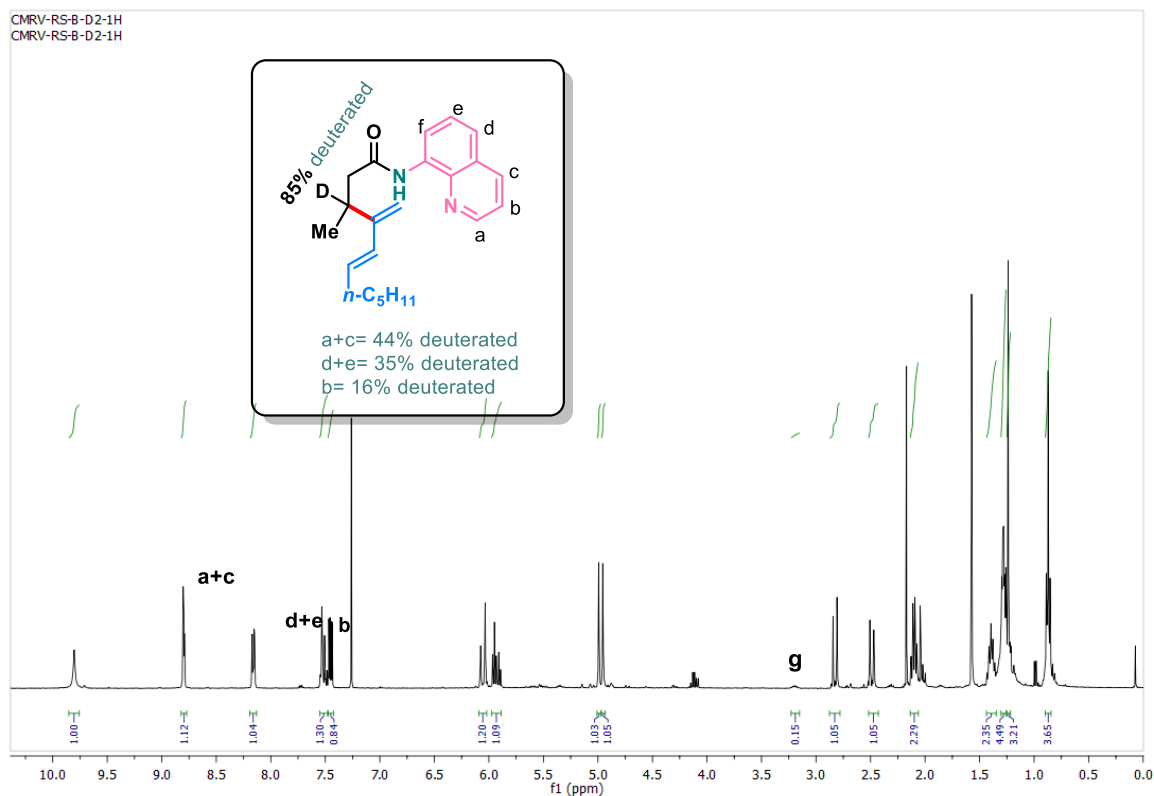

## 12. References.

1. a) Zaitsev, V. G.; Shabashov, D.; Daugulis, O. *J. Am. Chem. Soc.* **2005**, *127*, 13154. b) Ano, Y.; Tobisu, M.; Chatani, N. *J. Am. Chem. Soc.* **2011**, *133*, 12984.

2. Li, Q.; Fu, C.; Ma, S. *Angew. Chem., Int. Ed.* **2012**, *51*, 11783–11786.
3. a) Wang, H.; Beiring, B.; Yu, D.; Collins, K.; Glorius, F. *Angew. Chem. Int. Ed.* **2013**, *52*, 47, 12430. b) Petrone, D. A.; Isomura, M.; Franzoni, I.; Rossler, S. L.; Carreira, E. M. *J. Am. Chem. Soc.* **2018**, *140*, 4697. c) Handa, S.; Lippincott, D. J.; Aue, D. H.; Lipshutz, B. H. *Angew. Chem., Int. Ed.* **2014**, *53*, 10658.
4. Pérez-Gómez, M.; Azizollahi, H.; Franzoni, I.; Larin, E. M.; Lautens, M.; García-López, J. A. *Organometallics* **2019**, *38*, 973–980.
5. Yang, X.; Sun, T.-Y.; Rao, Y. *Chem. - Eur. J.* **2016**, *22*, 3273.

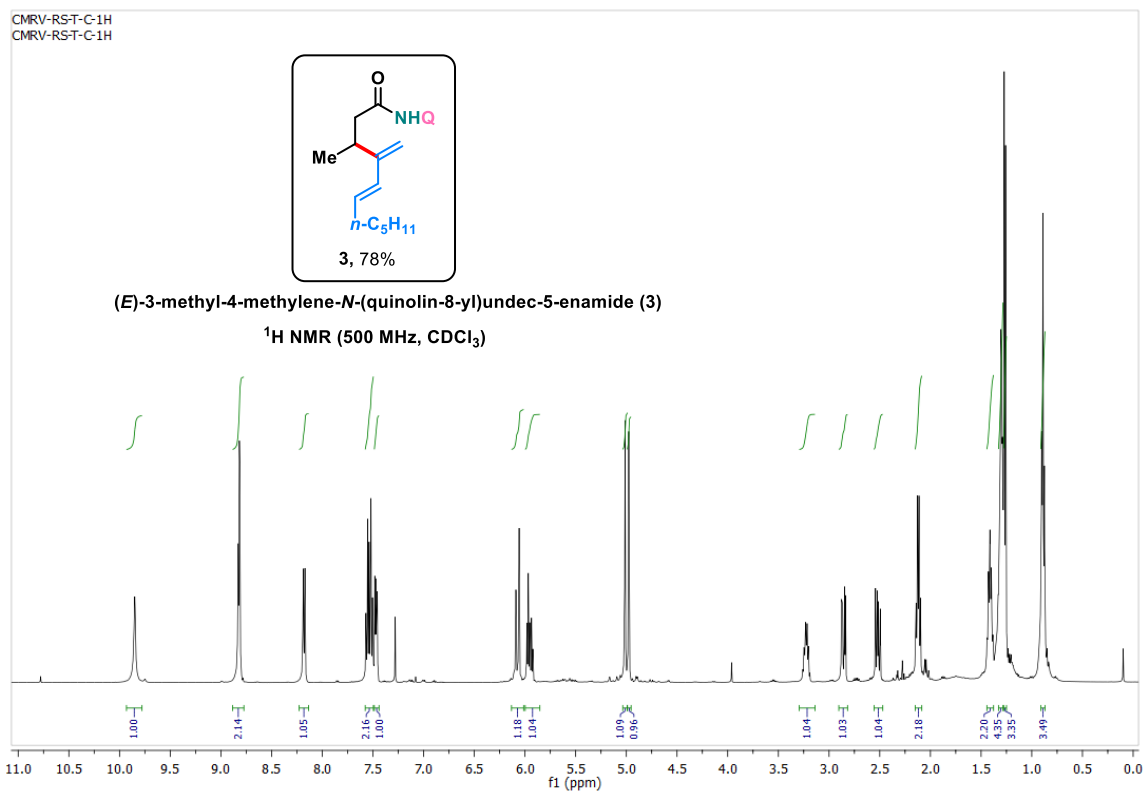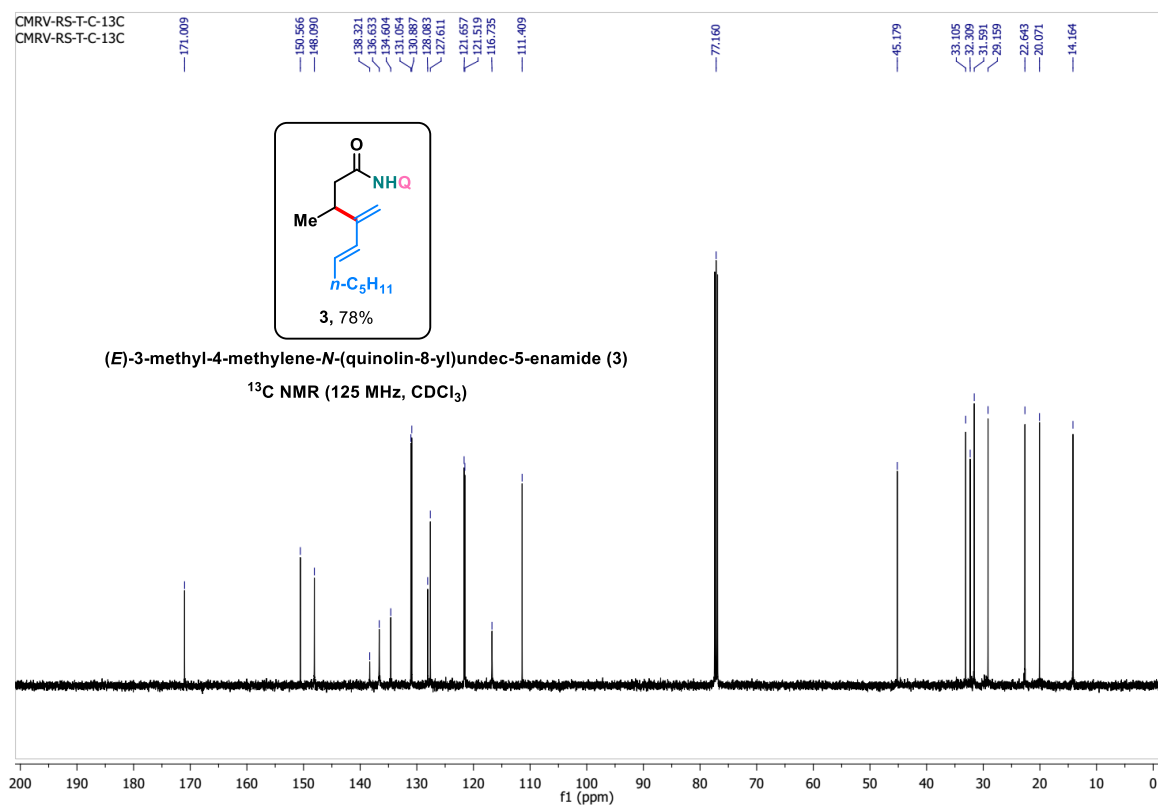



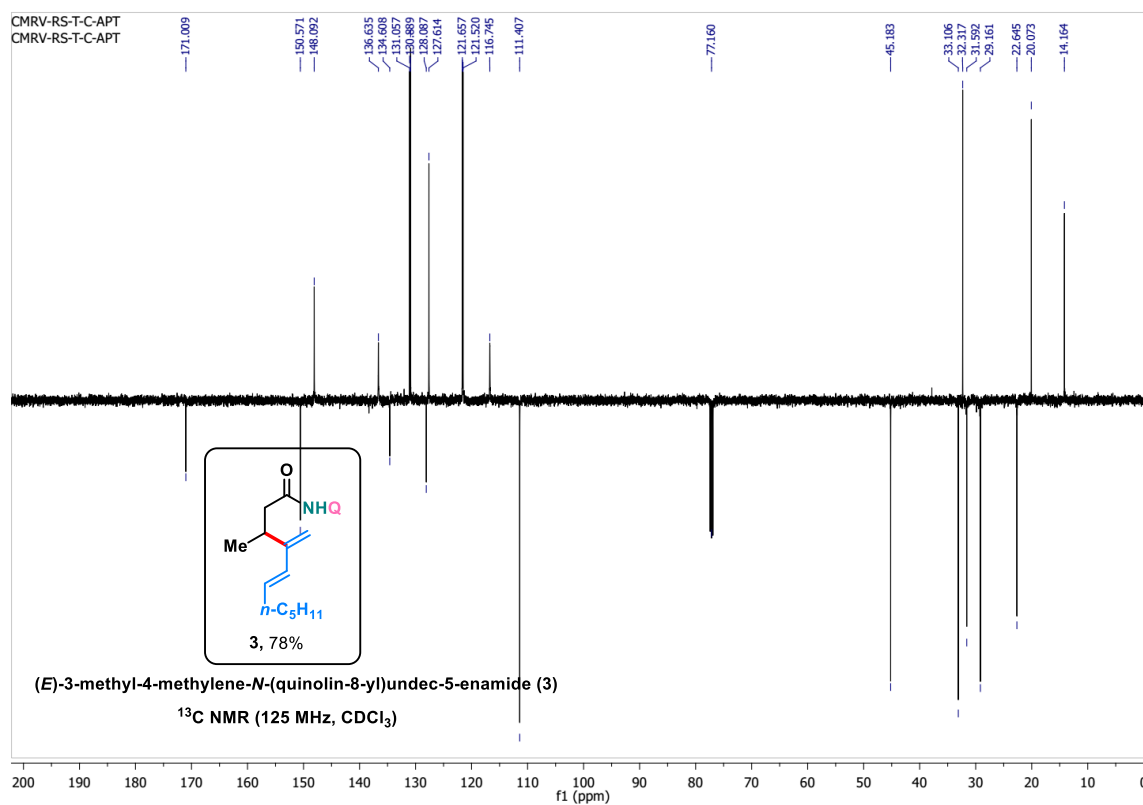

CMRV-RS-78-B2-1H  
CMRV-RS-78-B2-1H

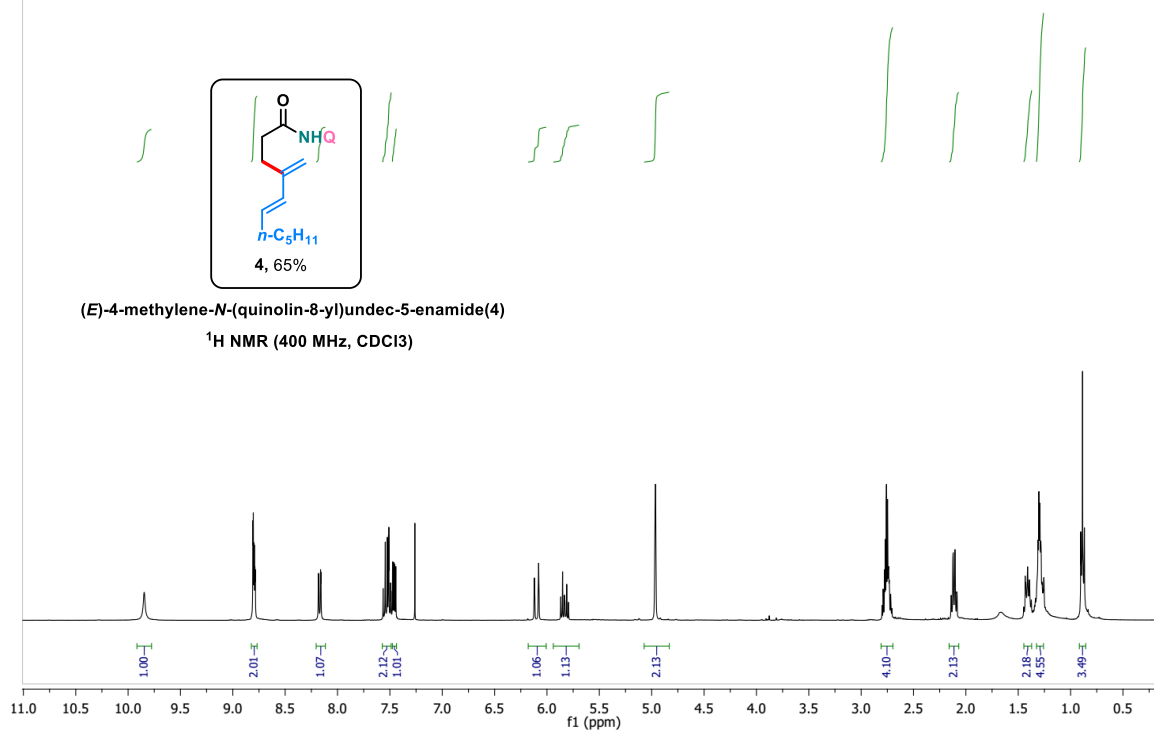

CMRV-RS-78-B2-13C  
CMRV-RS-78-B2-13C

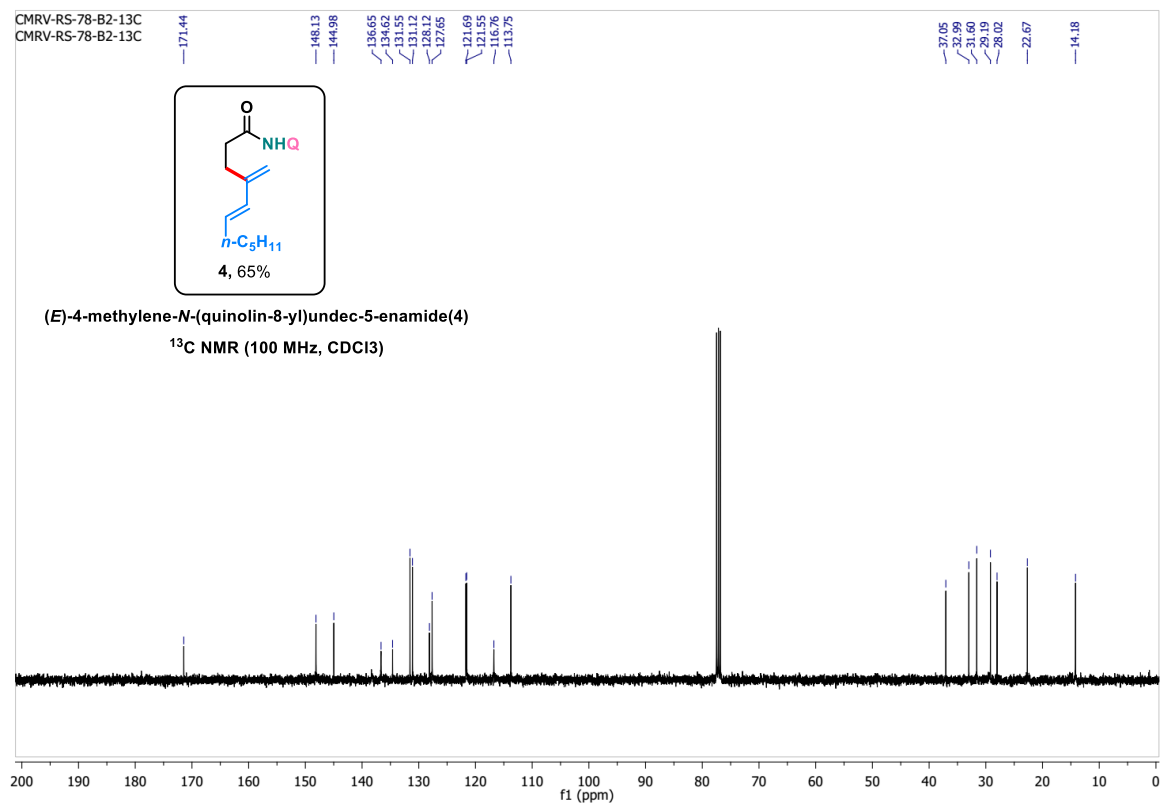

CMRV-RS-622-1H  
CMRV-RS-622-1H

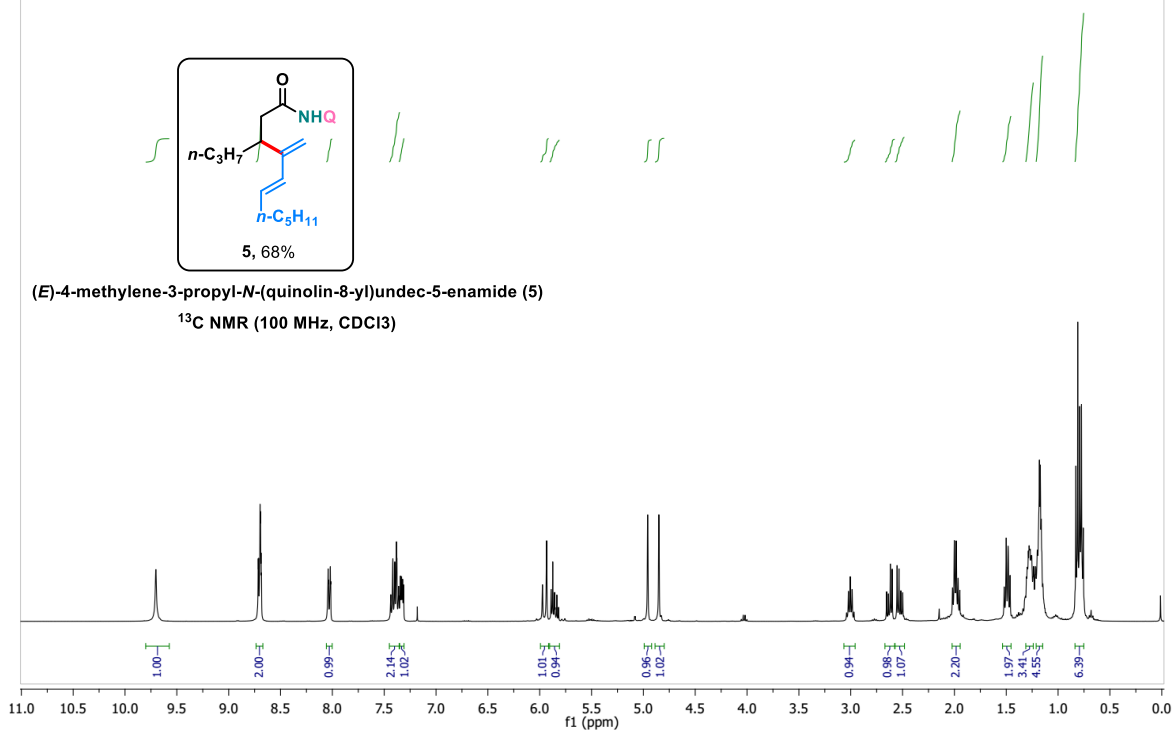

CMRV-RS-622\_13C  
CMRV-RS-622\_13C

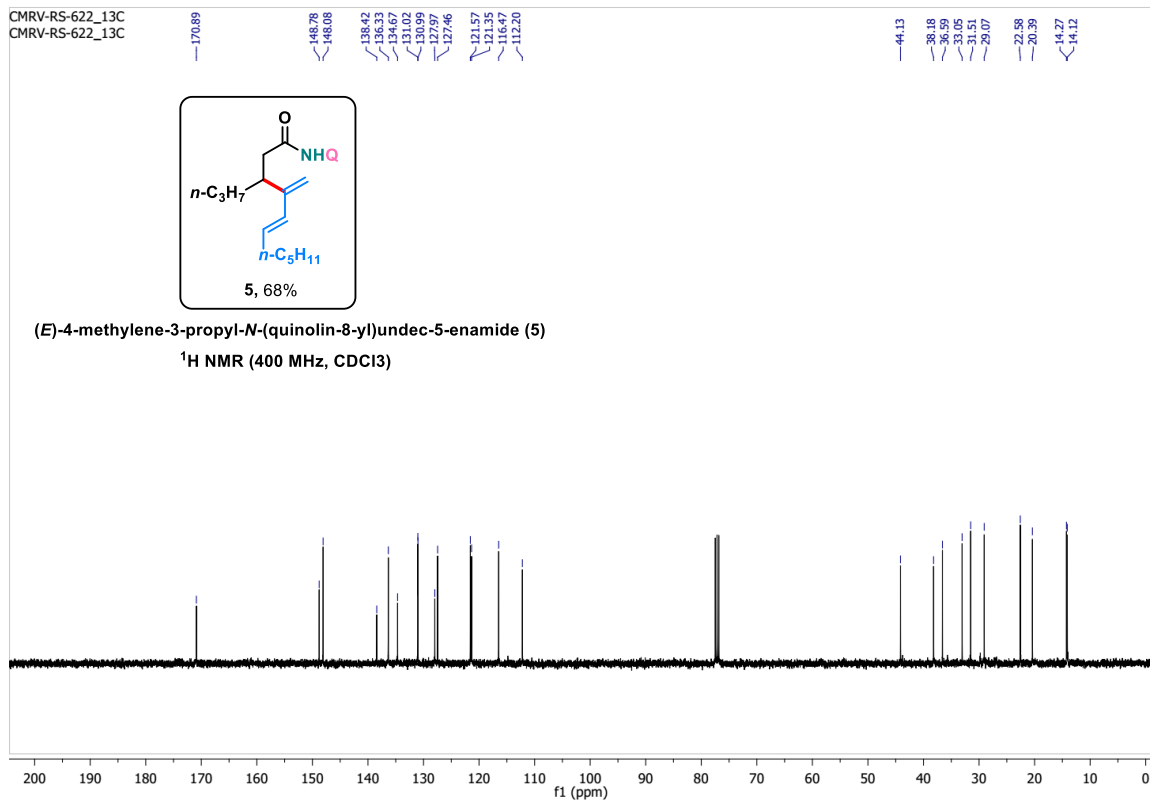

cmrv-an-2-153-1h  
cmrv-an-2-153-1h

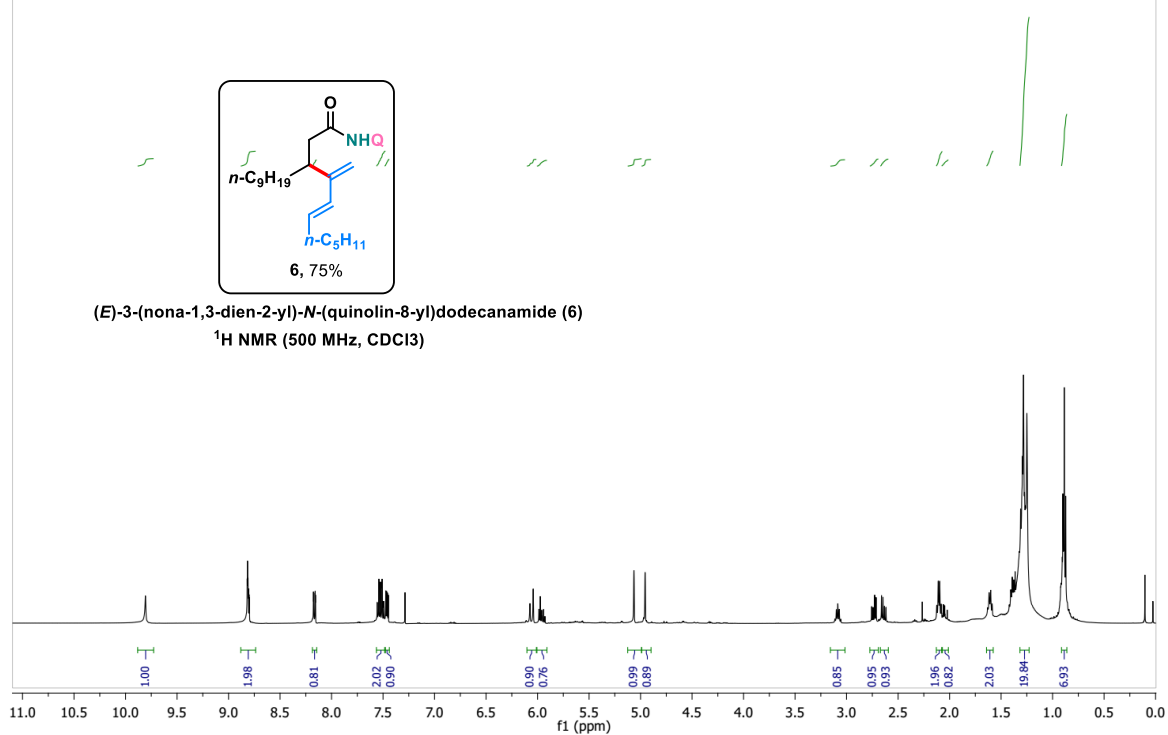

cmrv-an-2-153-13c  
Test-13C

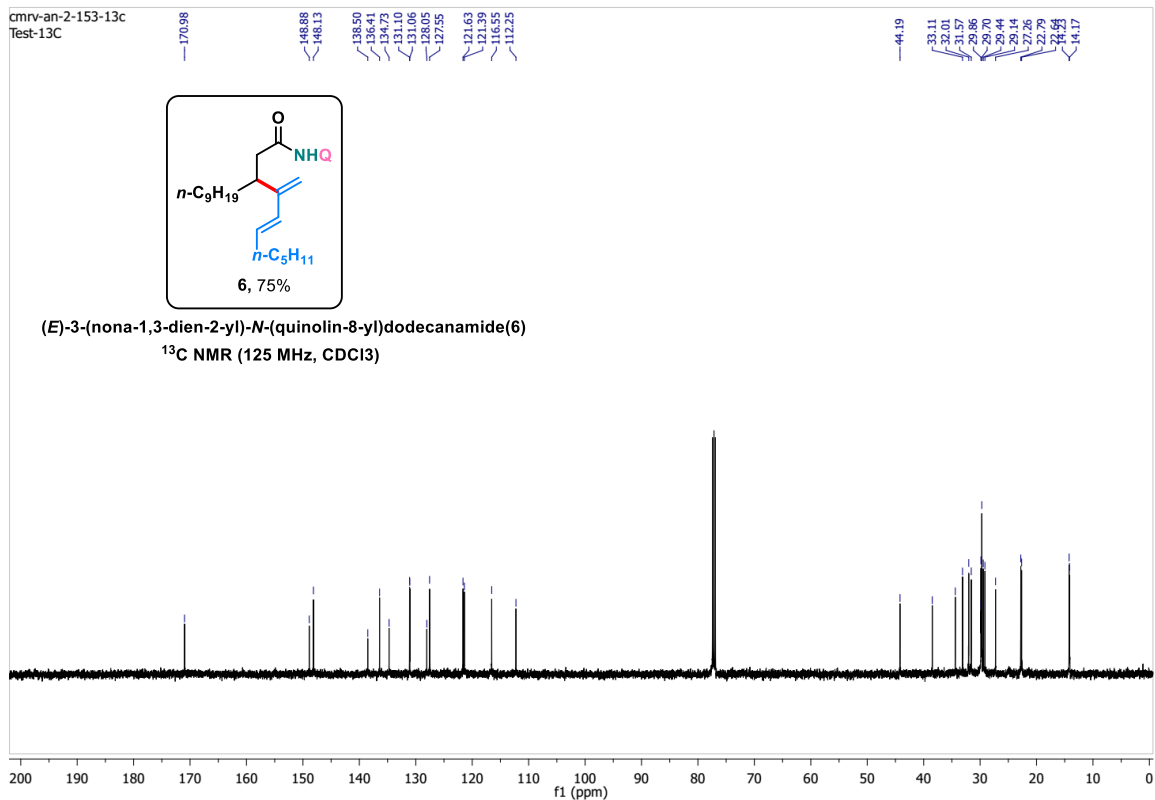

CMRV-RS-623-1H  
CMRV-RS-623-1H

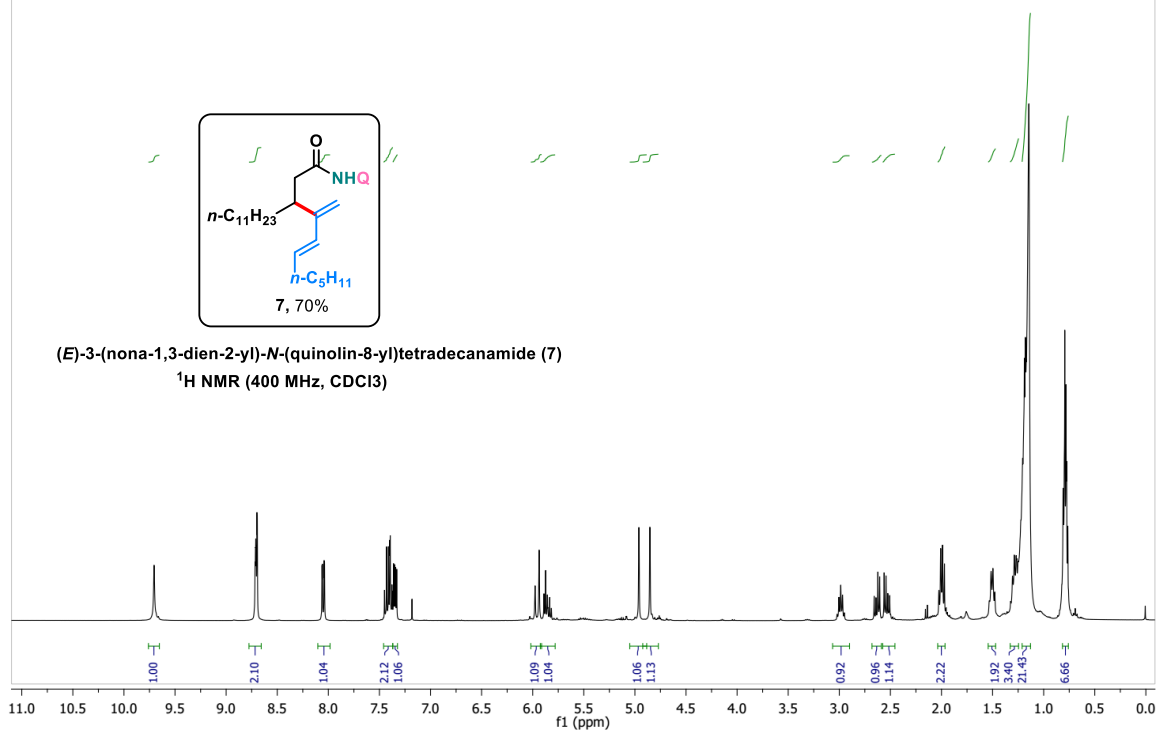

CMRV-RS-623-13C  
CMRV-RS-623-13C

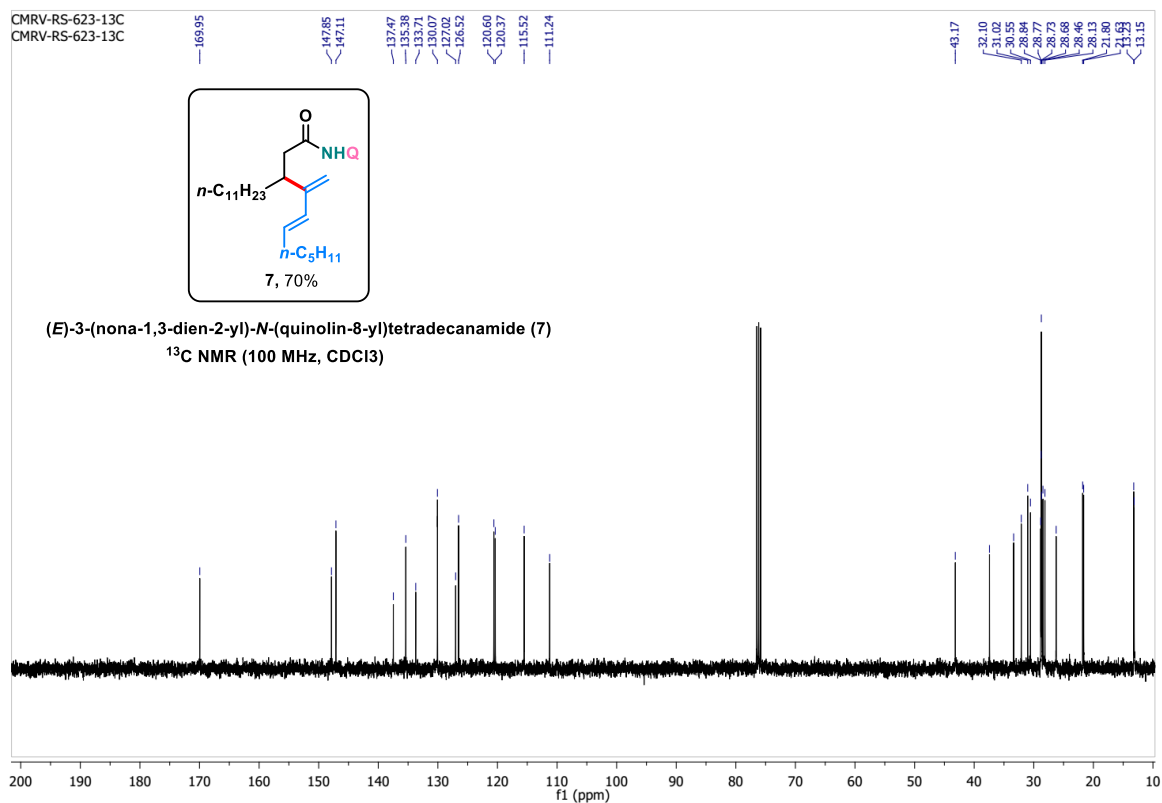

CMRV-AN-2-79-1H  
CMRV-AN-2-79-1H

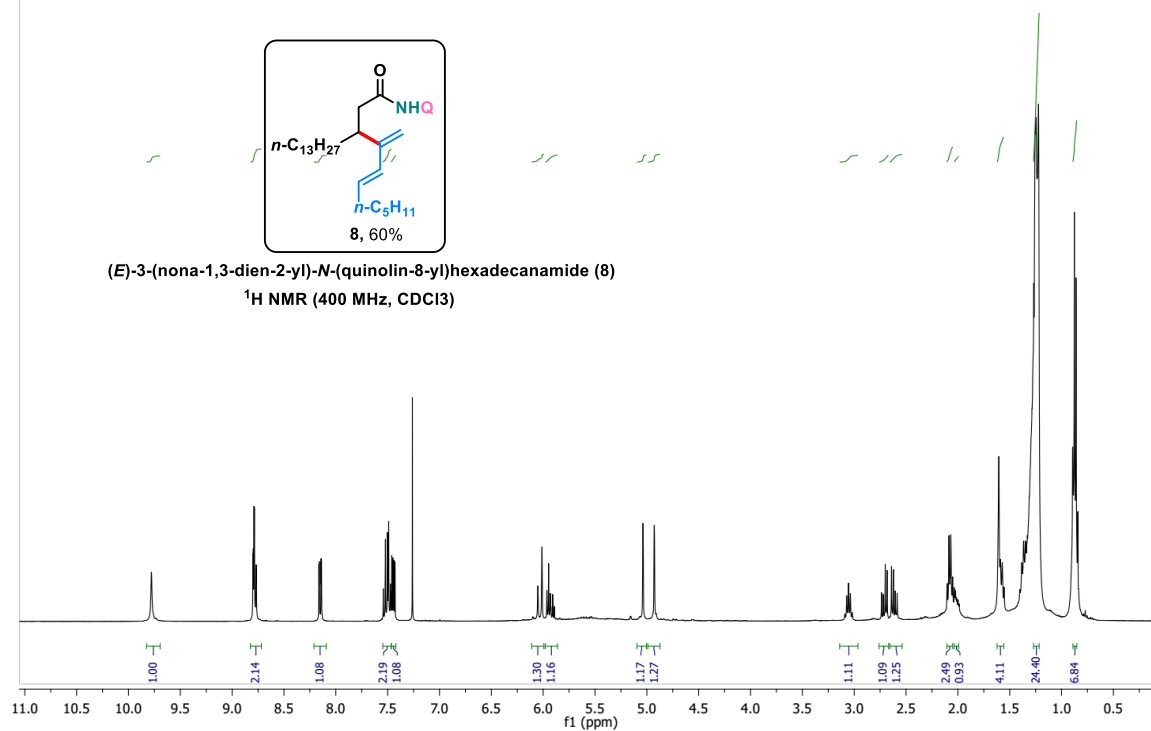

CMRV-AN-2-79-13C  
CMRV-AN-2-79-13C

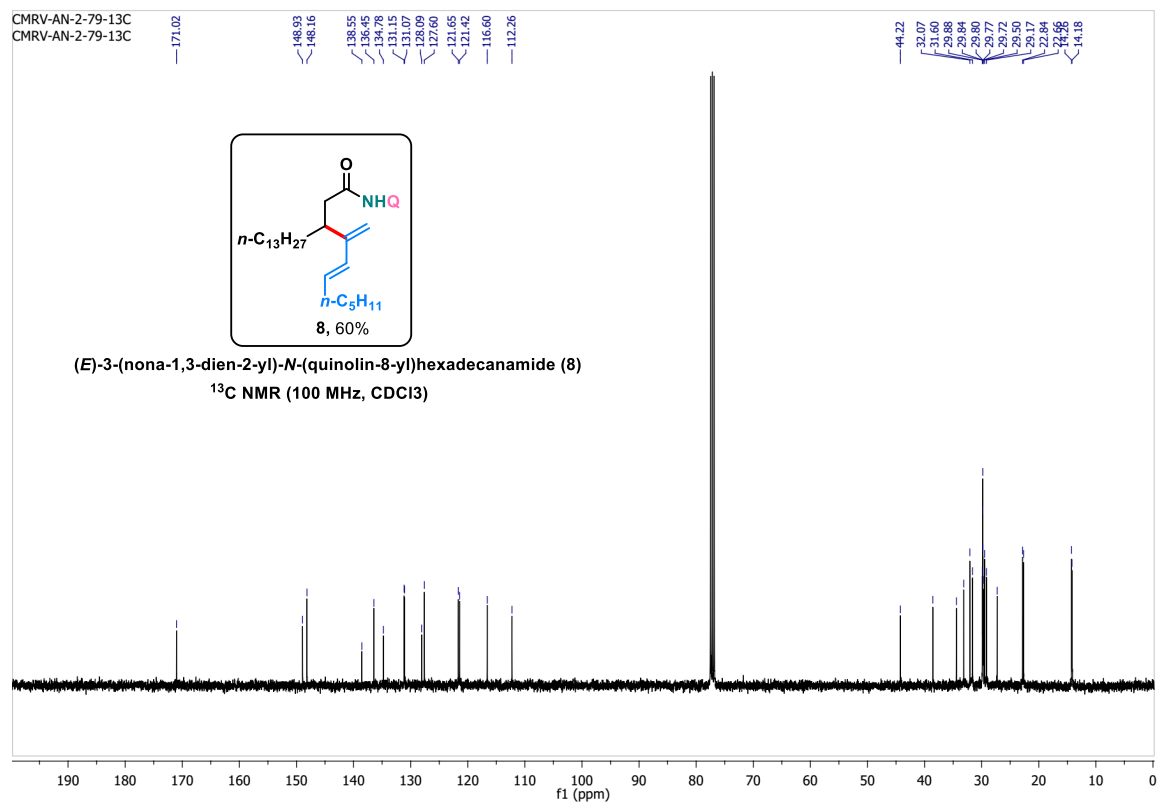

CMRV-AN-2-80-1H  
CMRV-AN-2-80-1H

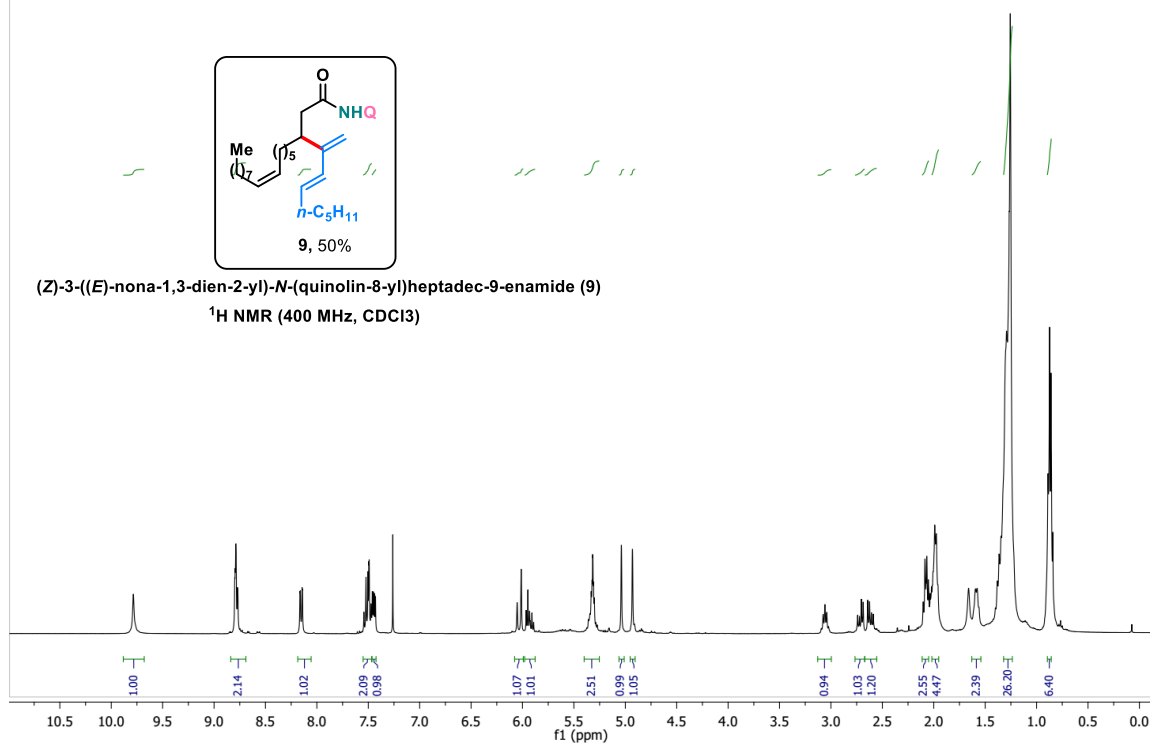

CMRV-AN-2-80-13C  
CMRV-AN-2-80-13C

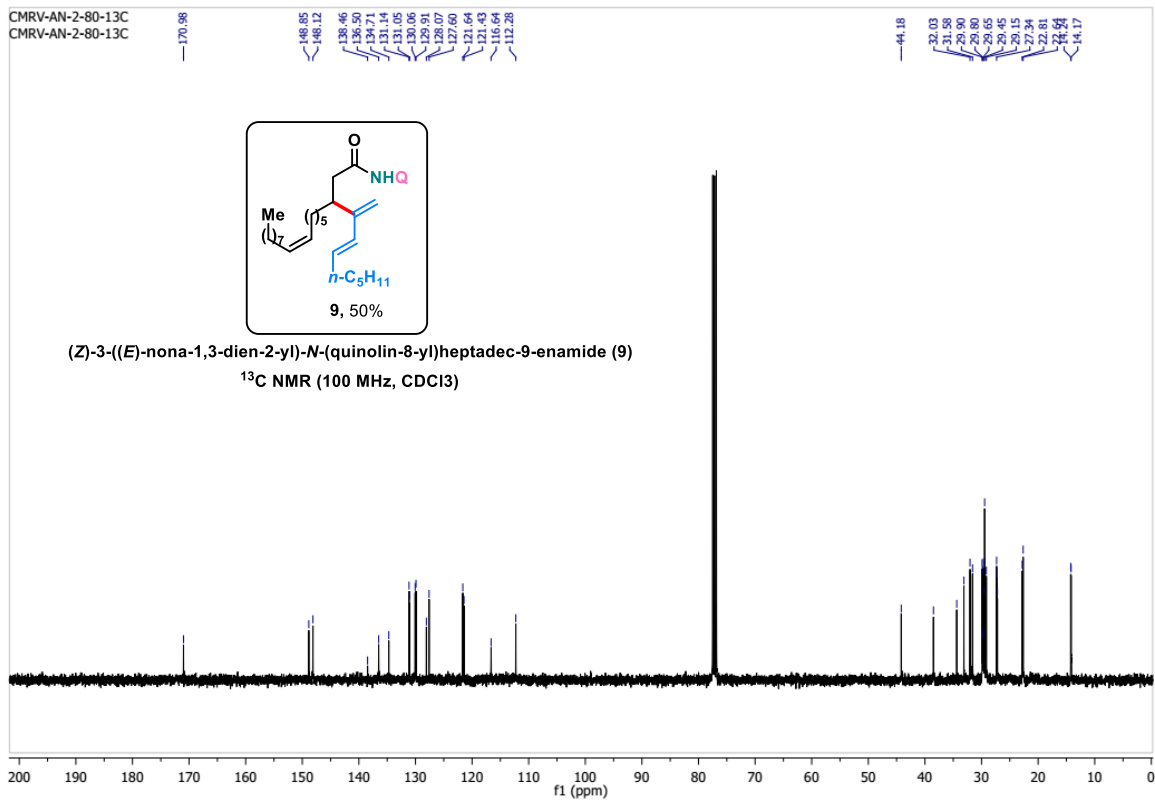

CMRV-AN-2-101-H  
CMRV-AN-2-101-H

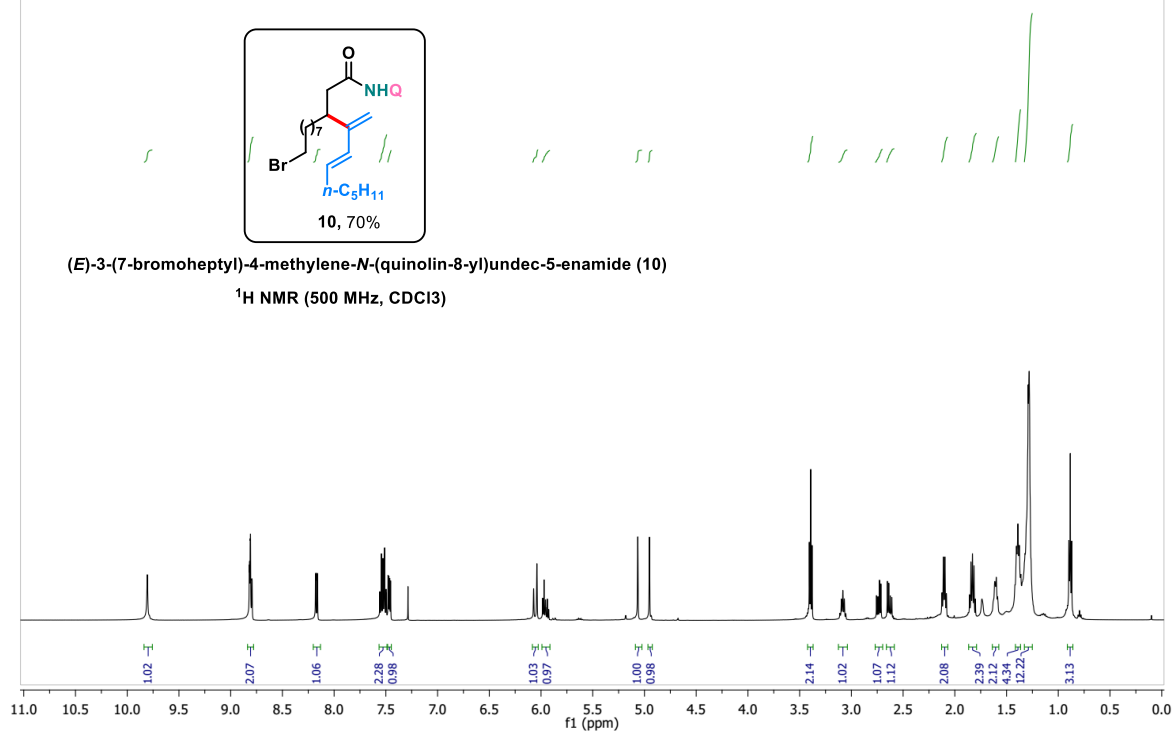

CMRV-AN-2-101-13C  
CMRV-AN-2-101-13C

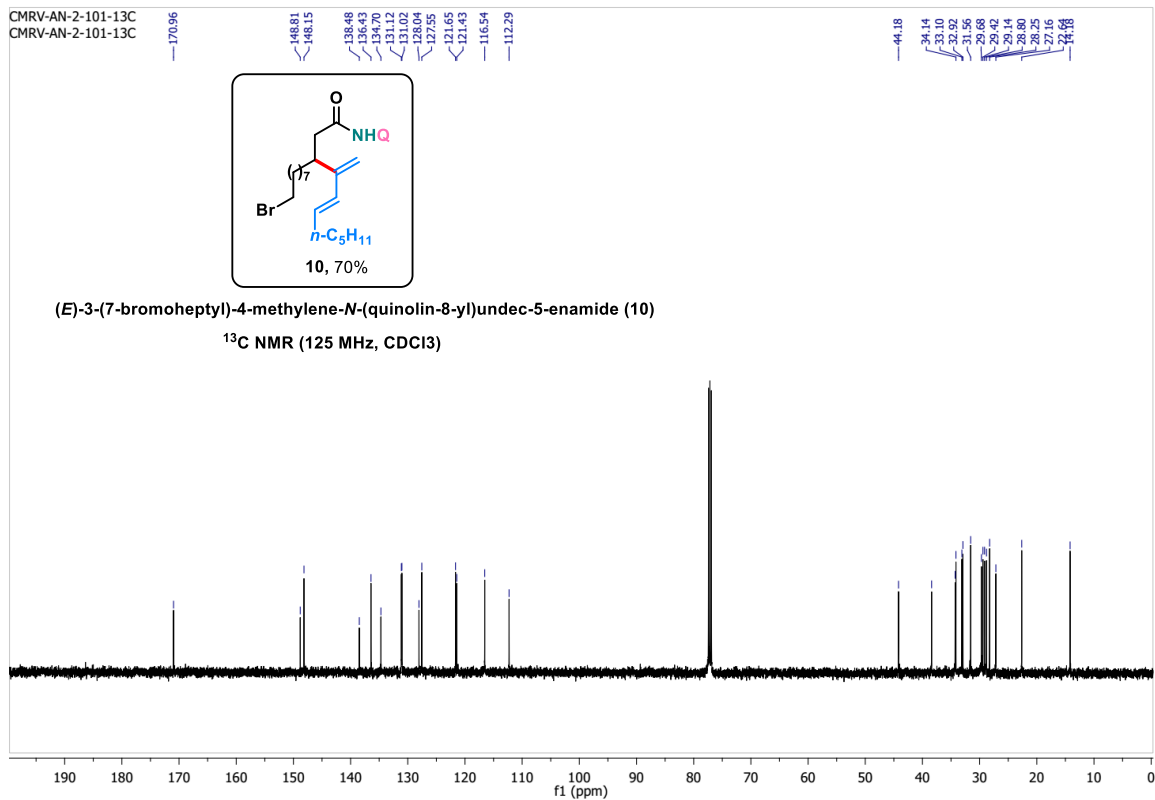



CMRV-RS-693-1H  
CMRV-RS-693-1H

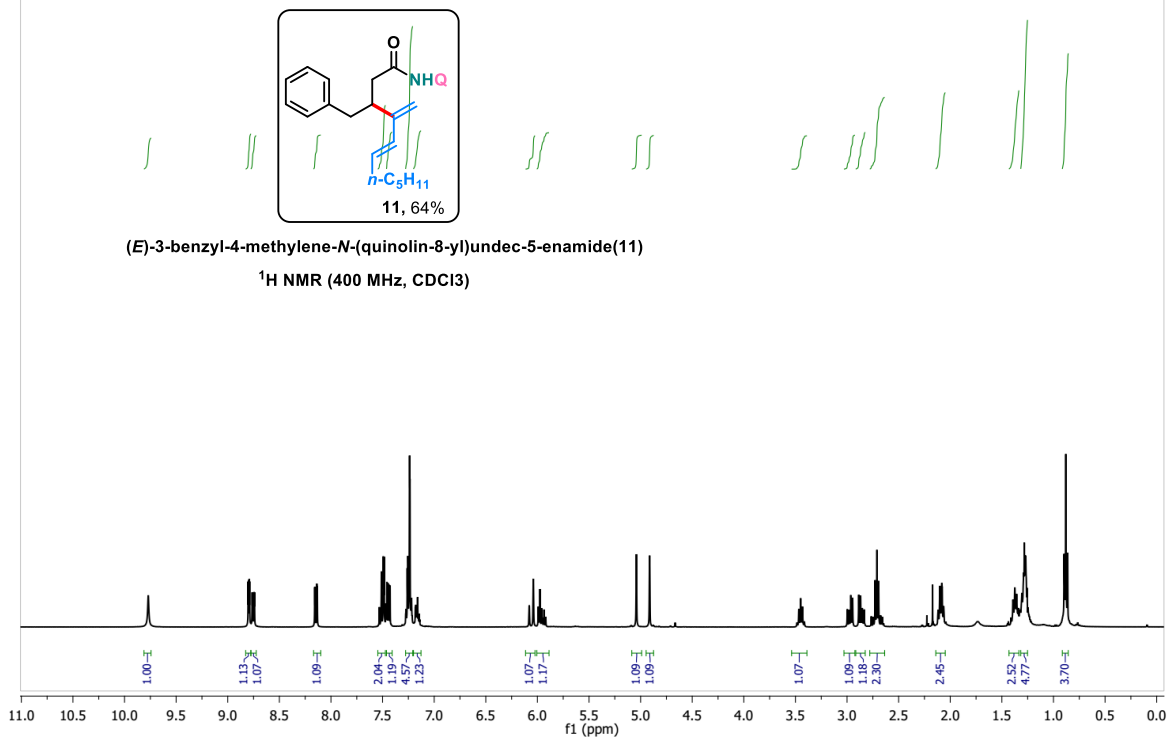

CMRV-RS-693-13C  
CMRV-RS-693-13C

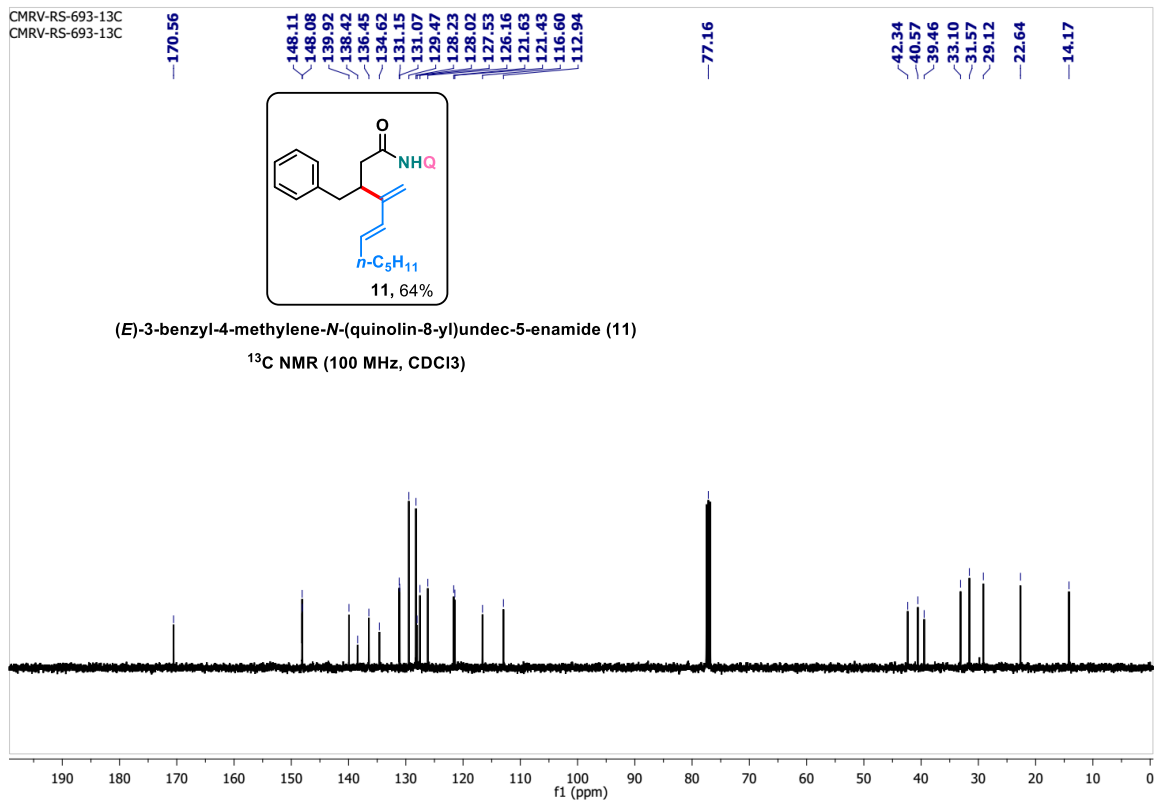

CMRV-RS-922-1H  
CMRV-RS-922-1H

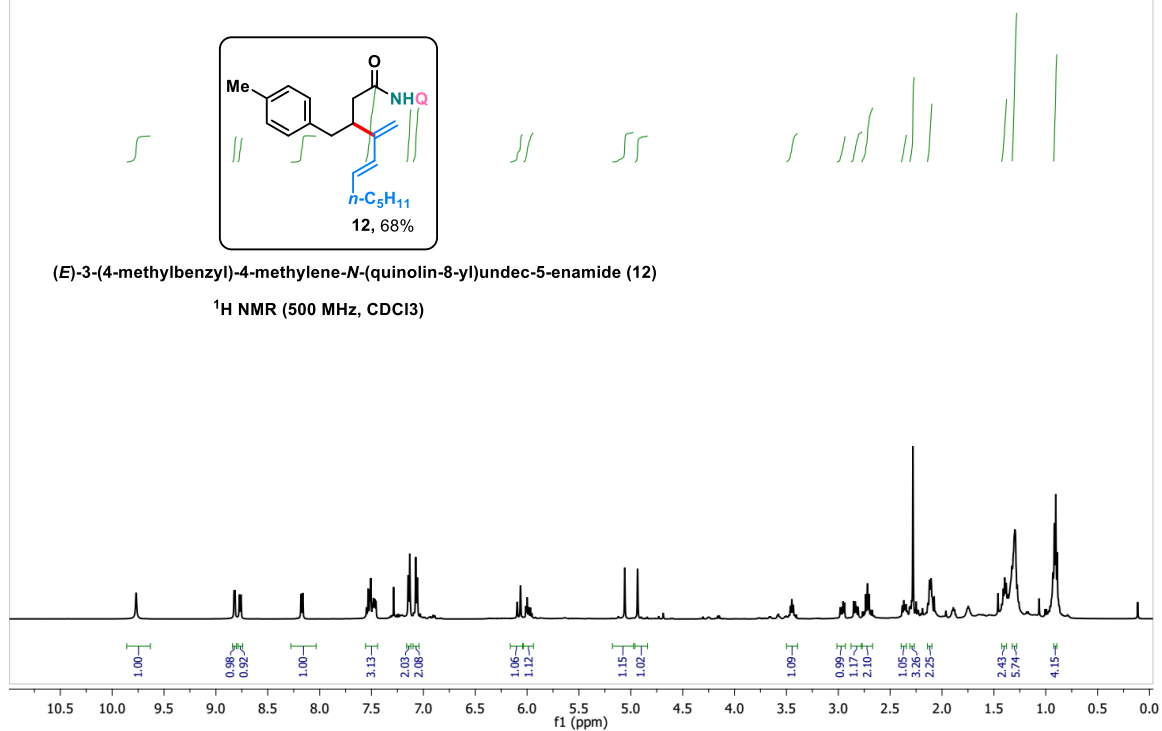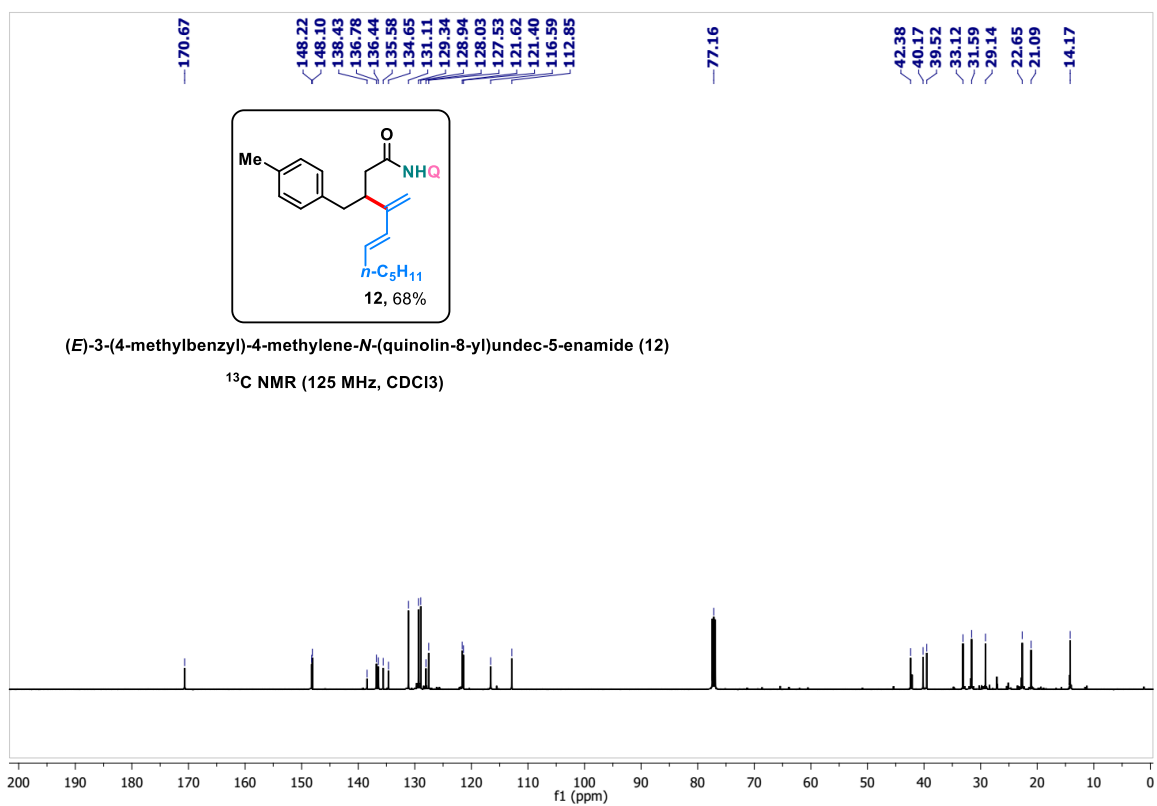

CMRV-RS-731-1H.9.fid  
CMRV-RS-731-1H

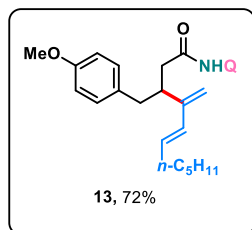

(*E*)-3-(4-methoxybenzyl)-4-methylene-*N*-(quinolin-8-yl)undec-5-enamide (13)

<sup>1</sup>H NMR (400 MHz, CDCl<sub>3</sub>)

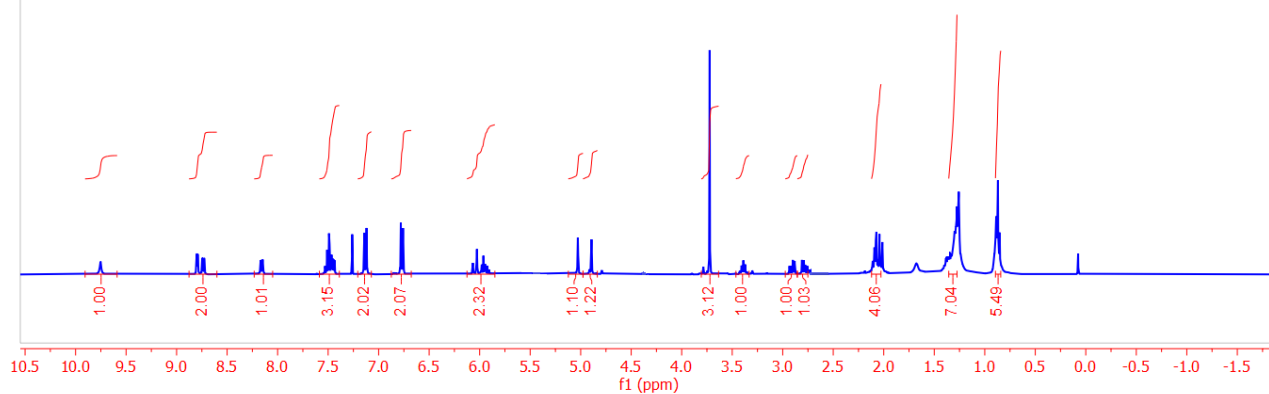

CMRV-RS-731-13C.10.fid  
CMRV-RS-731-13C

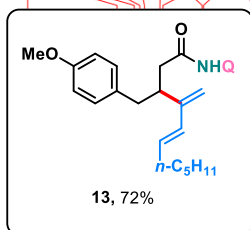

(*E*)-3-(4-methoxybenzyl)-4-methylene-*N*-(quinolin-8-yl)undec-5-enamide (13)

<sup>13</sup>C NMR (100 MHz, CDCl<sub>3</sub>)

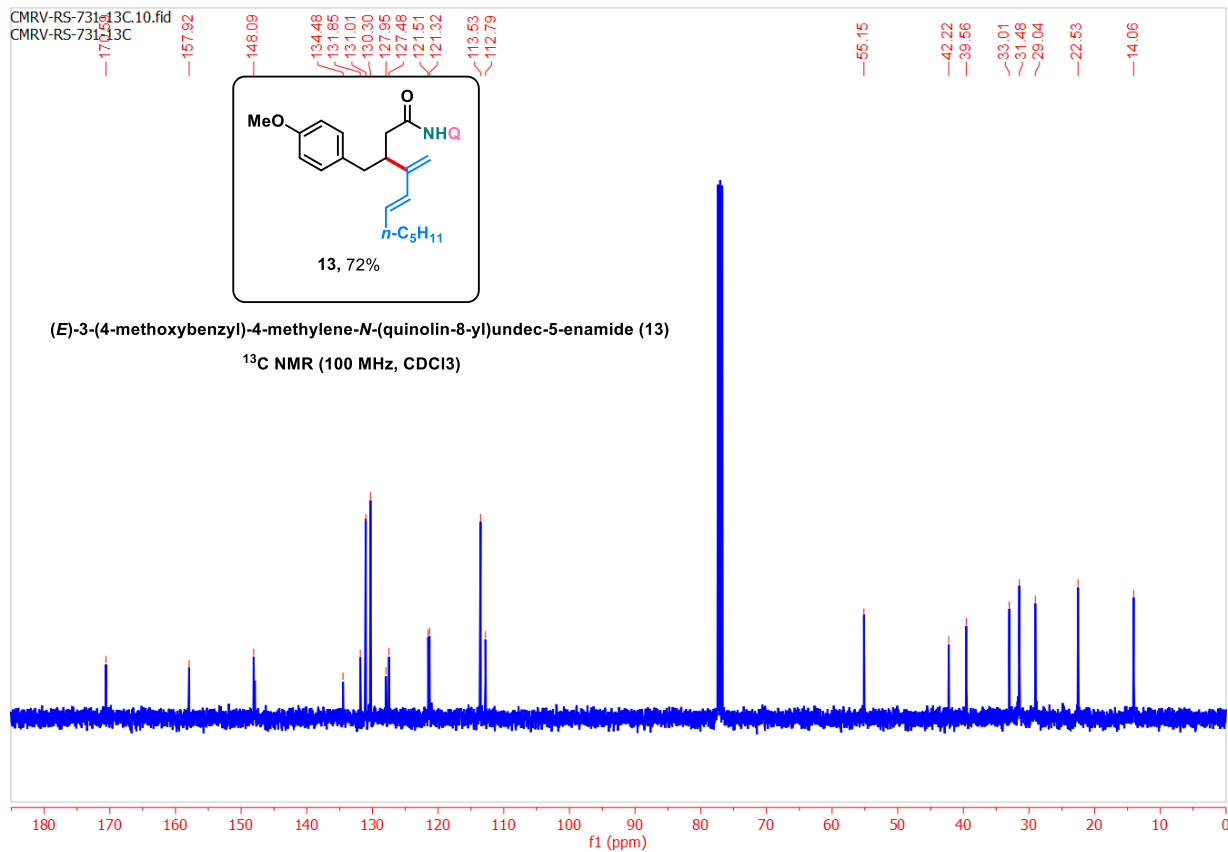

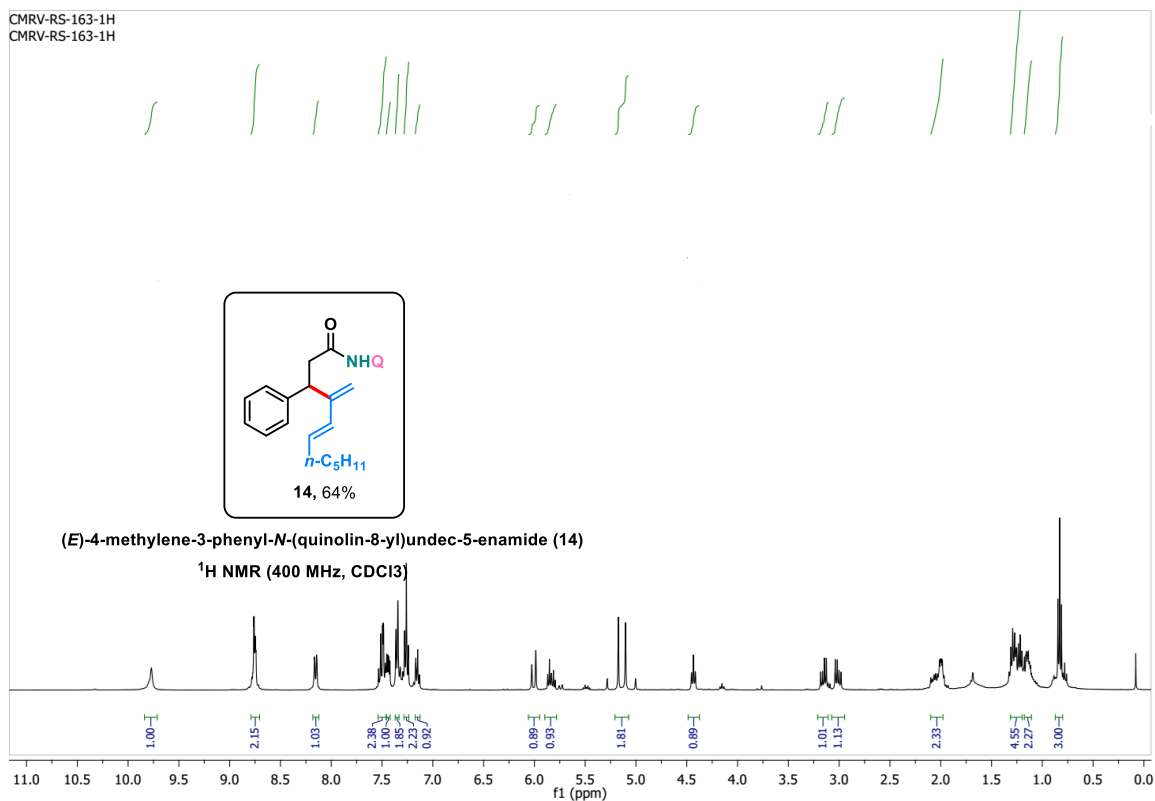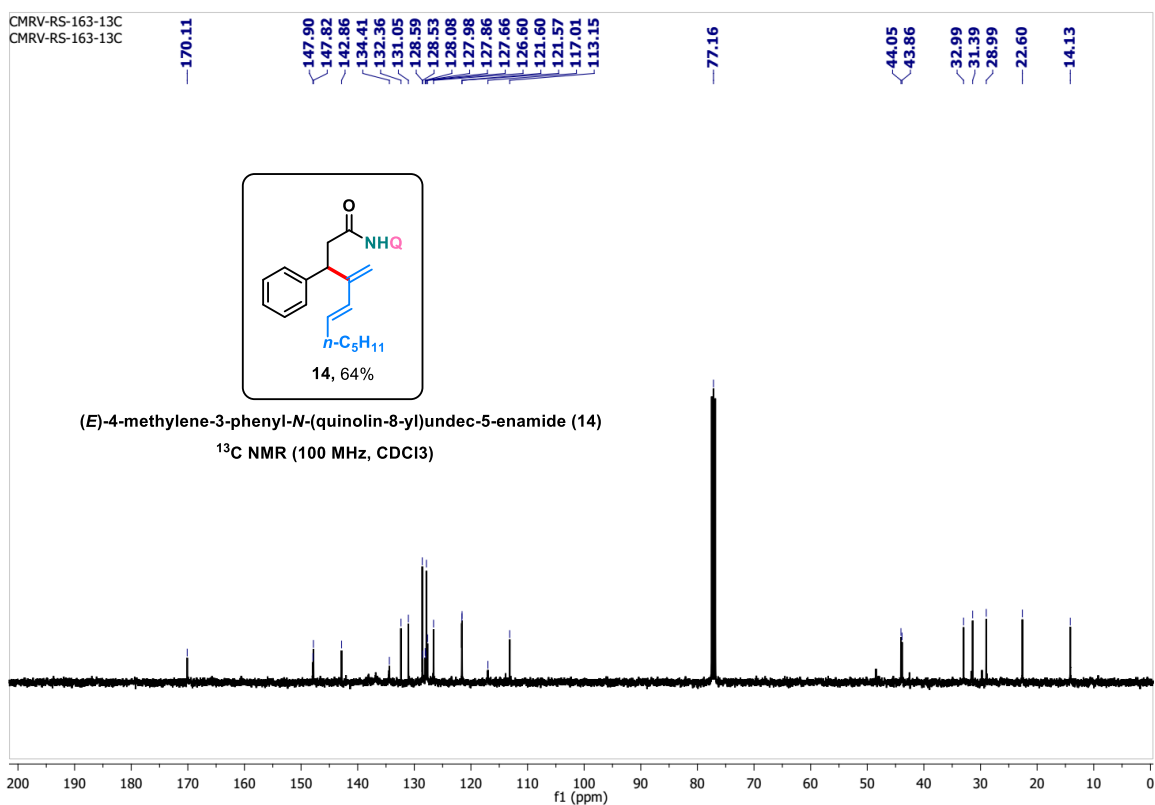

CMRV-RS-614-1H.1.fid  
CMRV-RS-614-1H

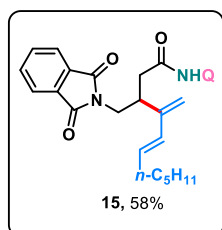

(E)-3-((1,3-dioxisoindolin-2-yl)methyl)-4-methylene-N-(quinolin-8-yl)undec-5-enamide (15)

<sup>1</sup>H NMR (400 MHz, CDCl<sub>3</sub>)

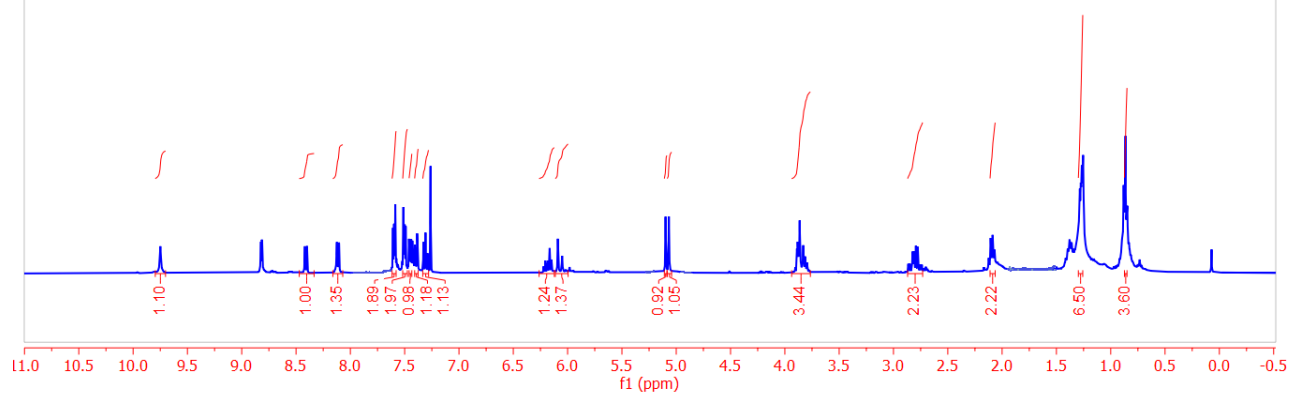

CMRV-RS-614-13C  
CMRV-RS-614-13C

169.75  
168.64  
148.23  
146.55  
136.29  
134.43  
133.74  
133.08  
132.00  
130.72  
127.89  
127.37  
123.11  
121.66  
116.31  
113.46

42.49  
41.09  
36.18  
33.18  
31.64  
29.07  
22.64  
14.24

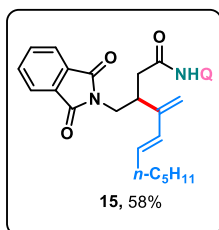

(E)-3-((1,3-dioxisoindolin-2-yl)methyl)-4-methylene-N-(quinolin-8-yl)undec-5-enamide (15)

<sup>13</sup>C NMR (100 MHz, CDCl<sub>3</sub>)

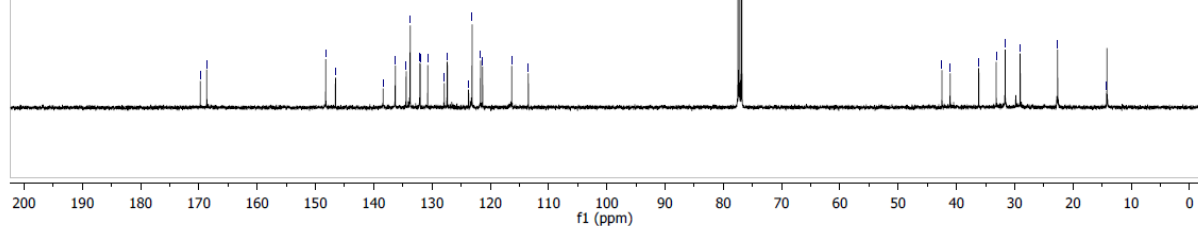

CMRV-RS-618-2-1H  
CMRV-RS-618-2-1H

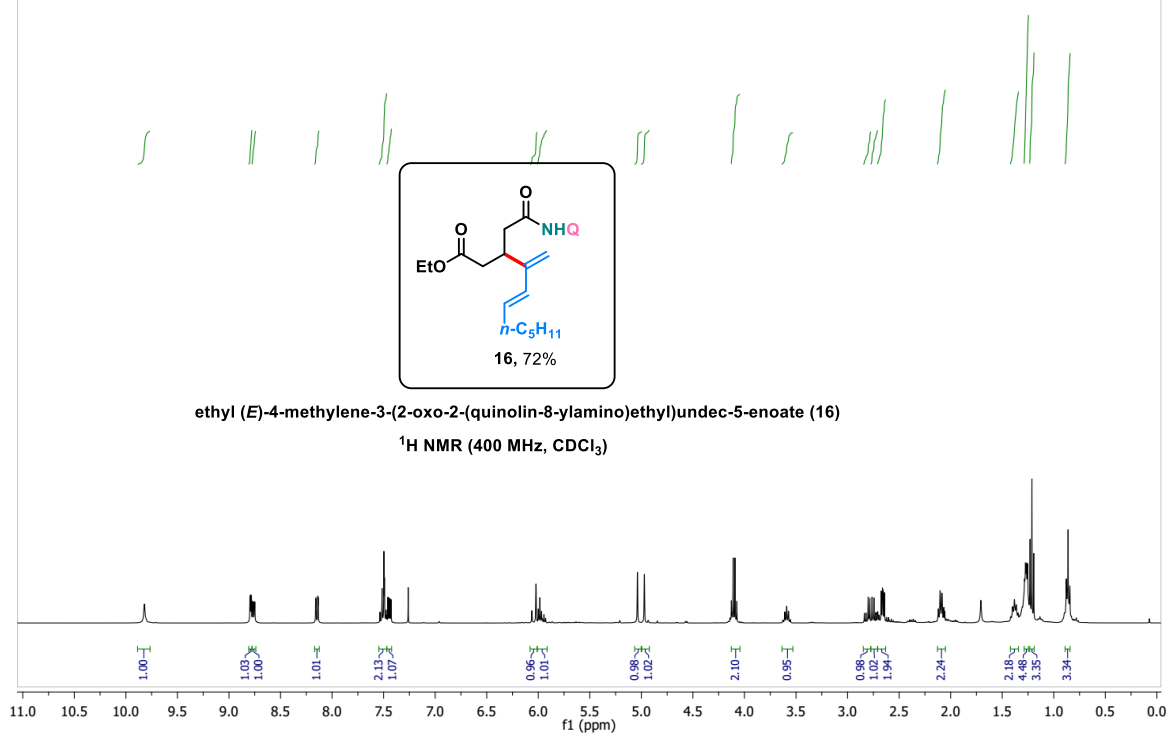

CMRV-RS-618-2-13C  
CMRV-RS-618-2-13C

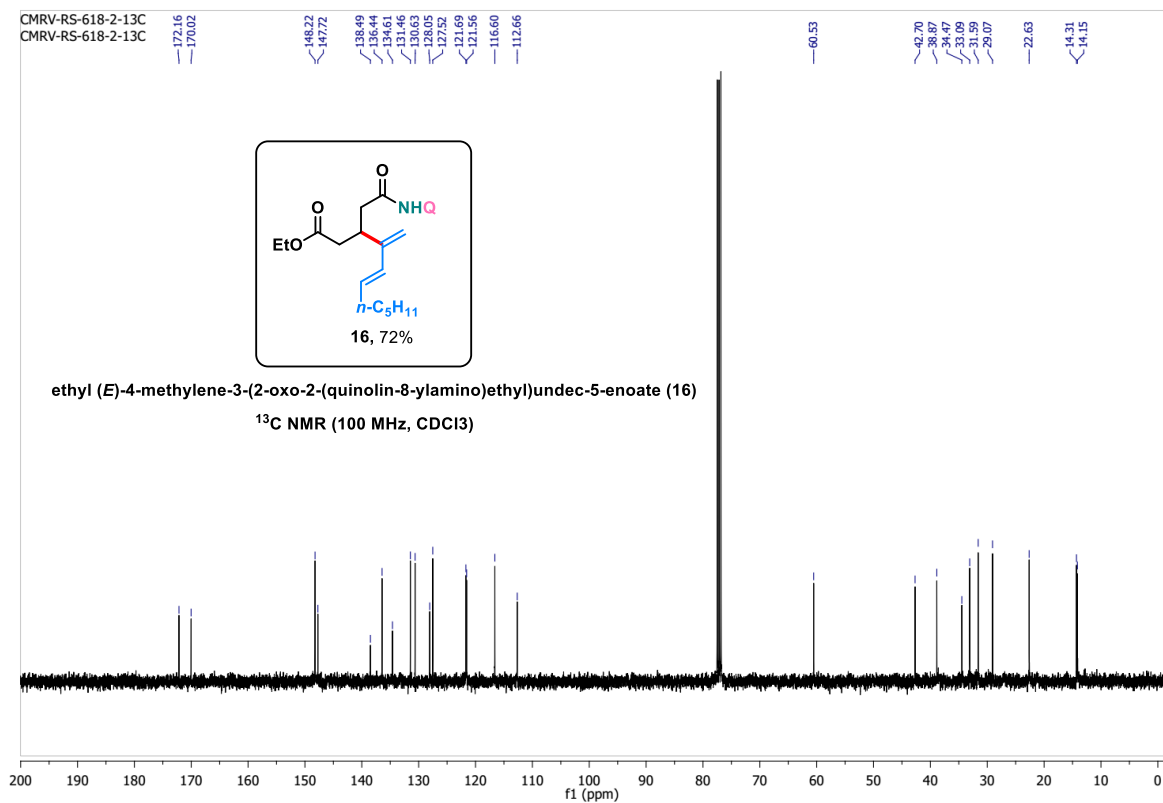

CMRV-RS-436-1H  
CMRV-RS-436-1H

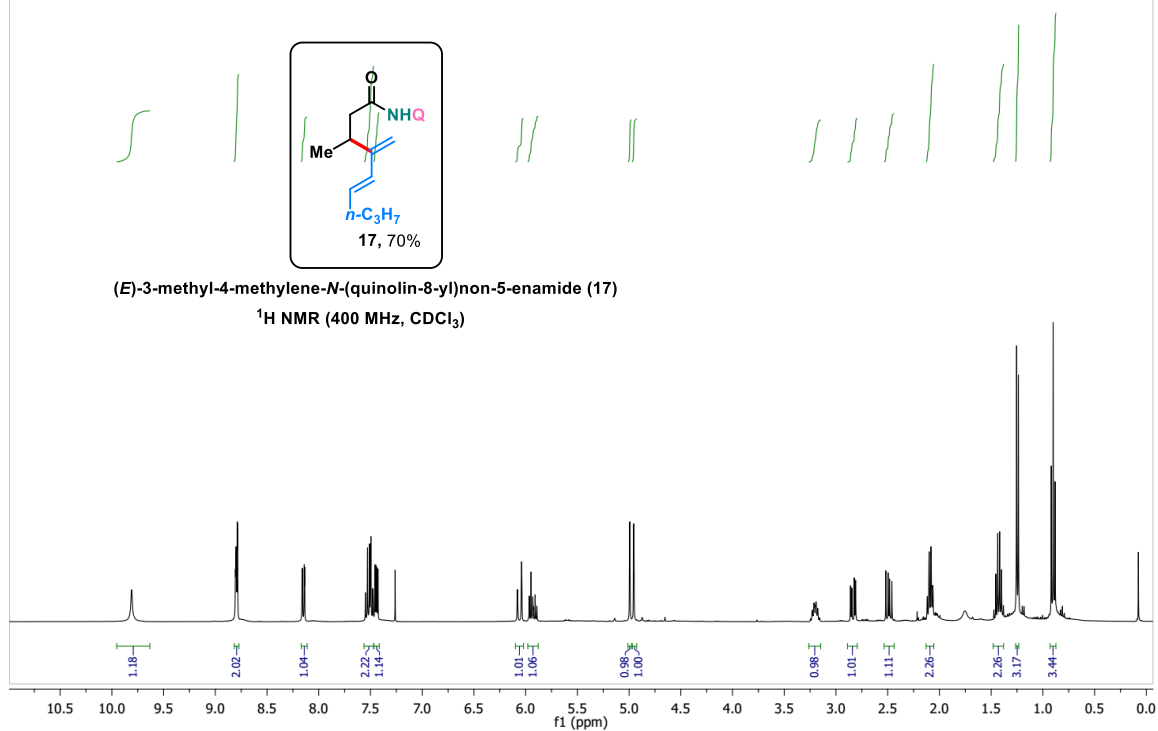

CMRV-RS-436-13C  
CMRV-RS-436-13C

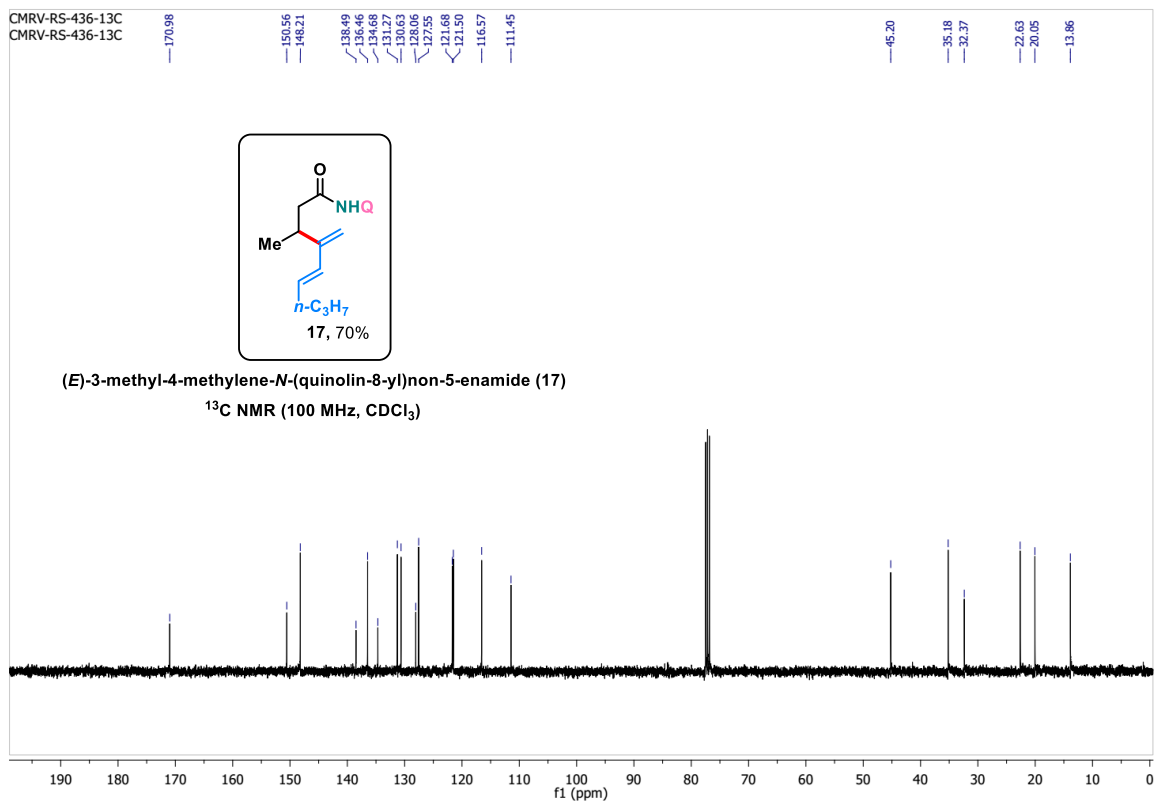

CMRV-JC-21-1H  
CMRV-JC-21-1H

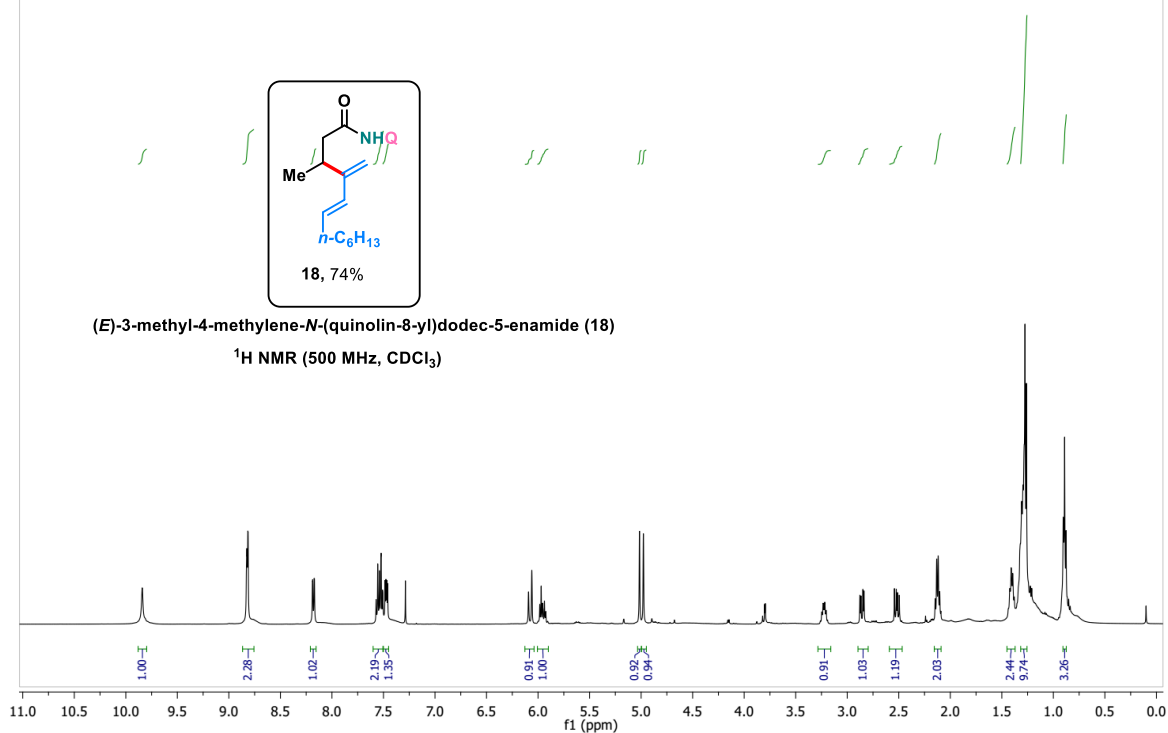

CMRV-JC-21-13C  
CMRV-JC-21-13C

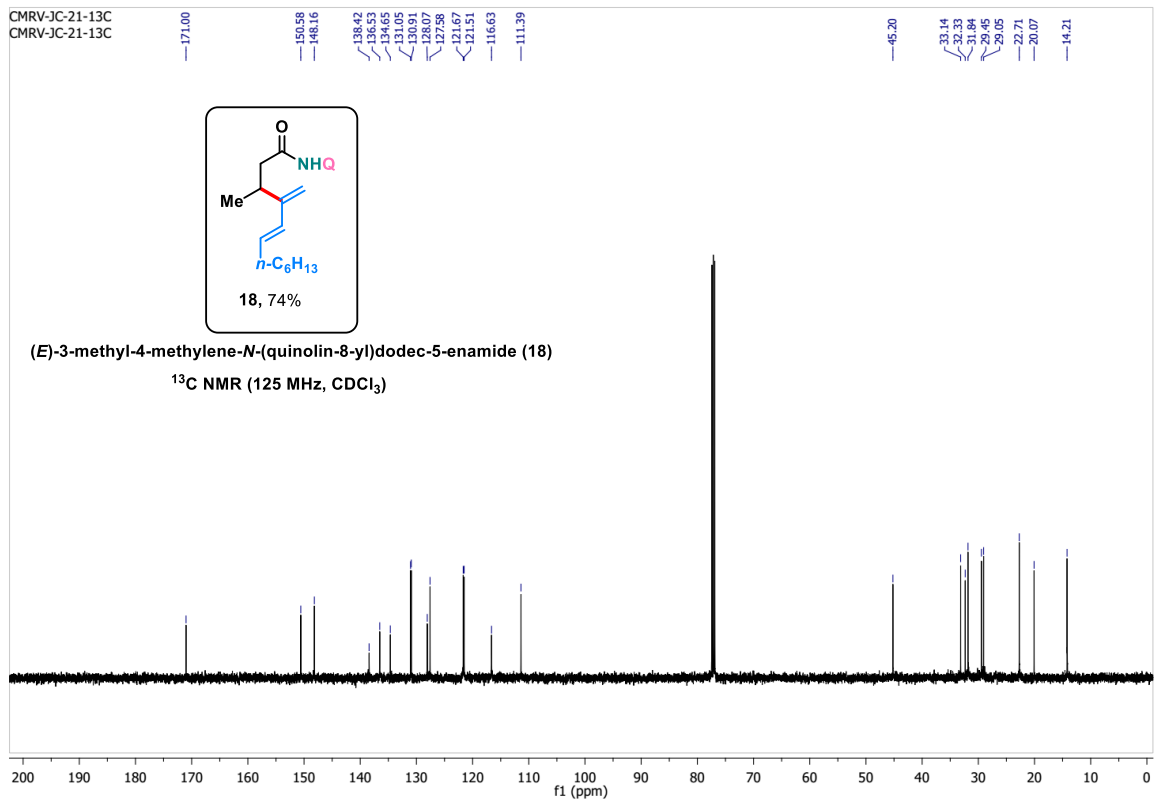



CMRV-AN-2-87-1H  
CMRV-AN-2-87-1H

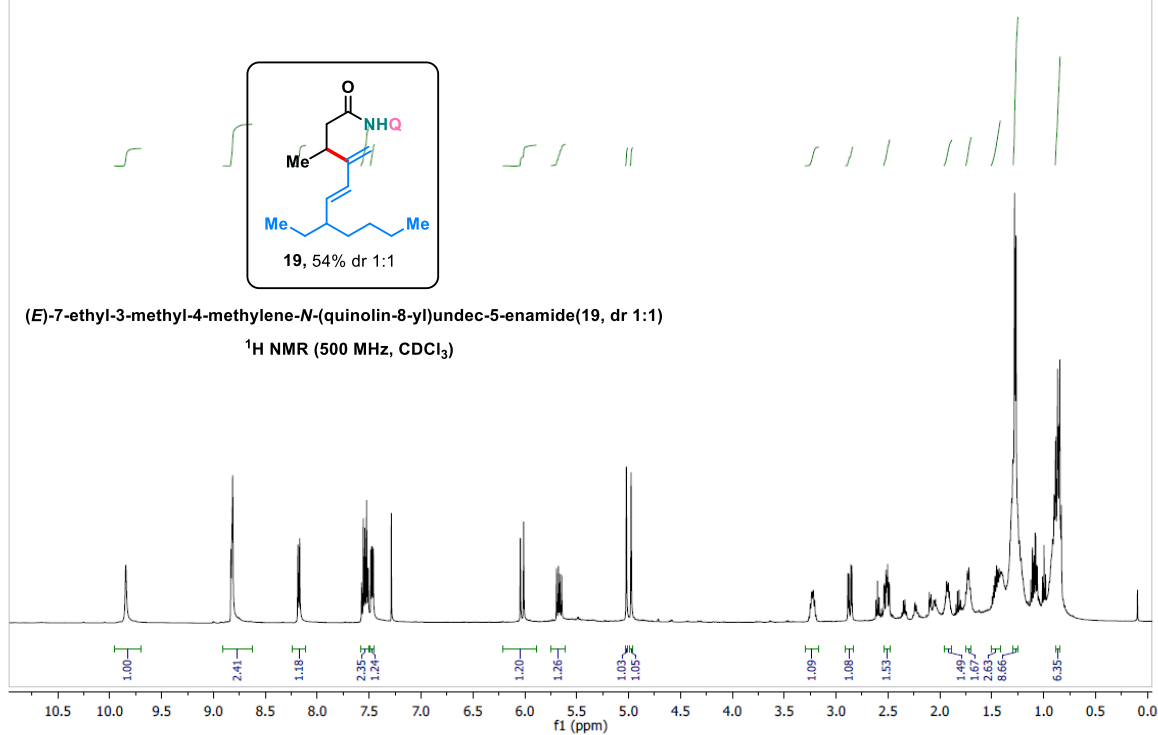

CMRV-AN-2-87-13C  
CMRV-AN-2-87-13C

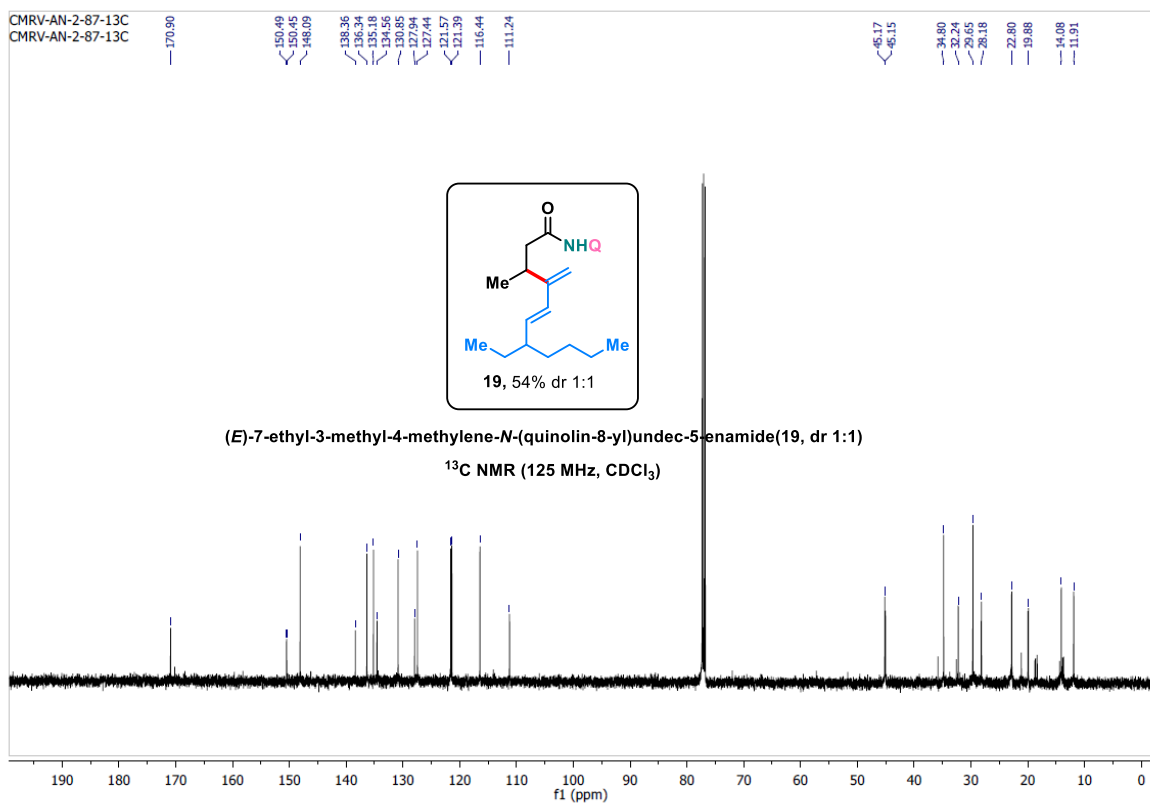

CMRV-RS-B2-73-2-1H  
CMRV-RS-B2-73-2-1H

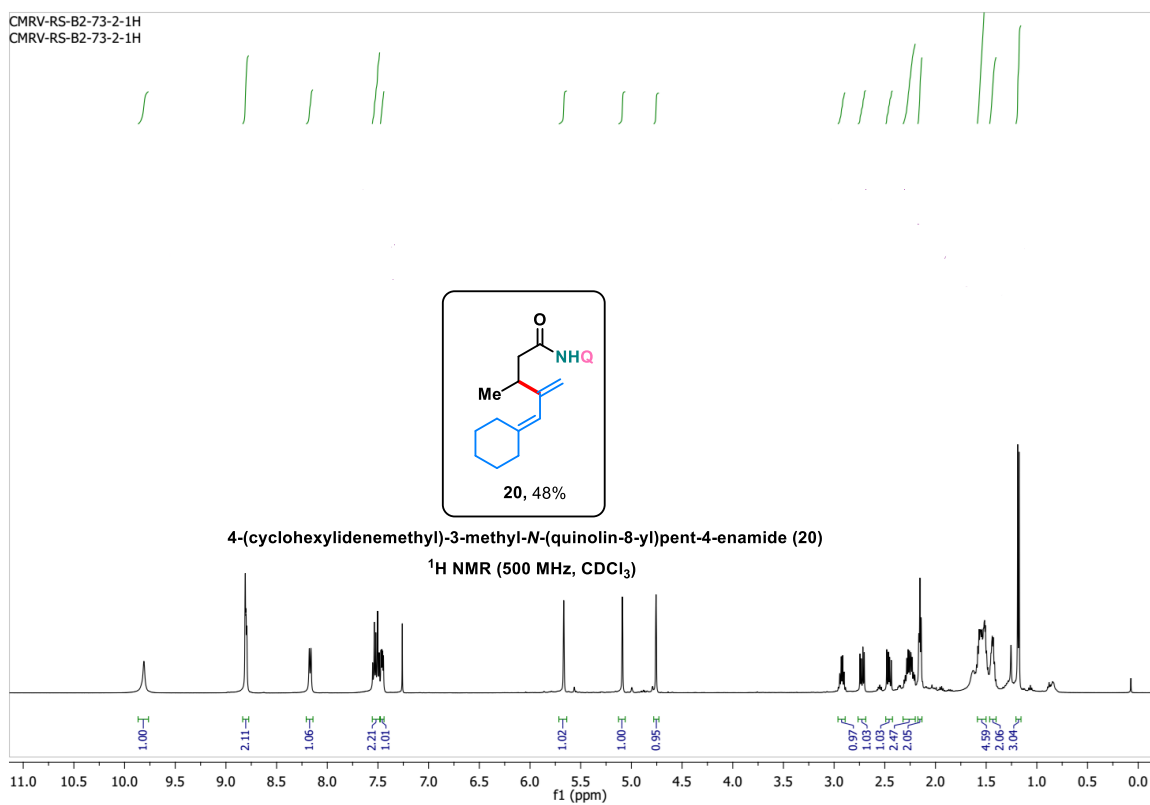

CMRV-RS-B2-73-2-13C  
CMRV-RS-B2-73-2-13C

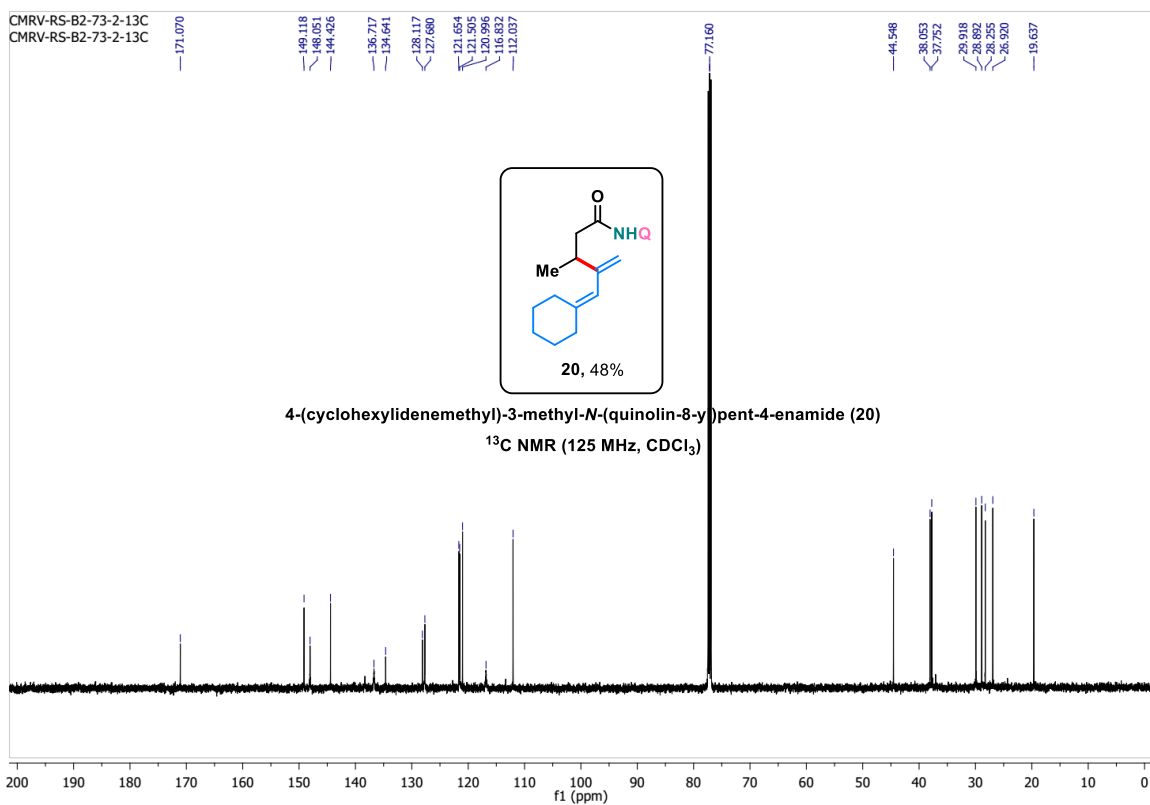

cmrv-rs-869-1h  
cmrv-rs-869-1h

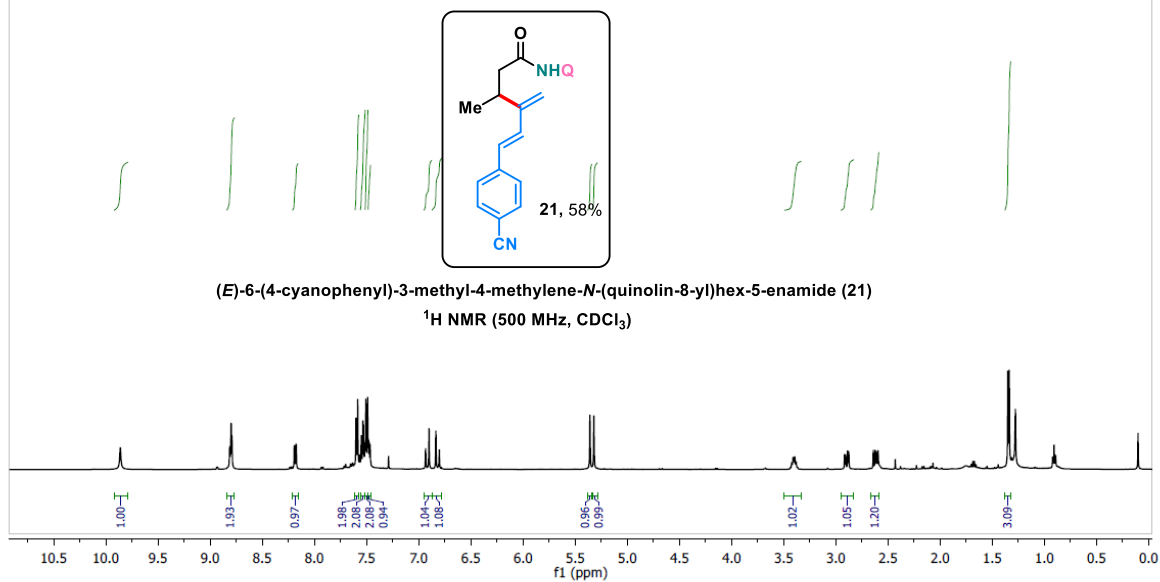

cmrv-rs-869-13c  
cmrv-rs-869-13c

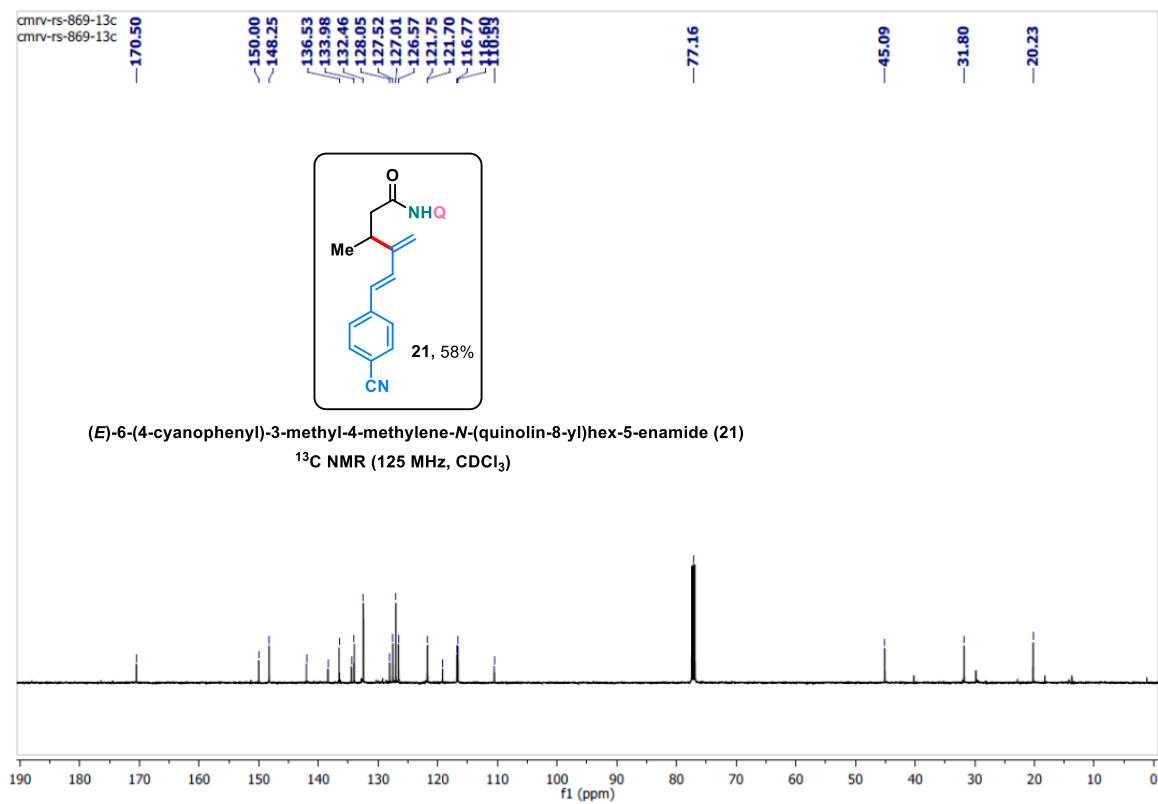

CMRV-RS-89-B2-1H  
CMRV-RS-89-B2-1H

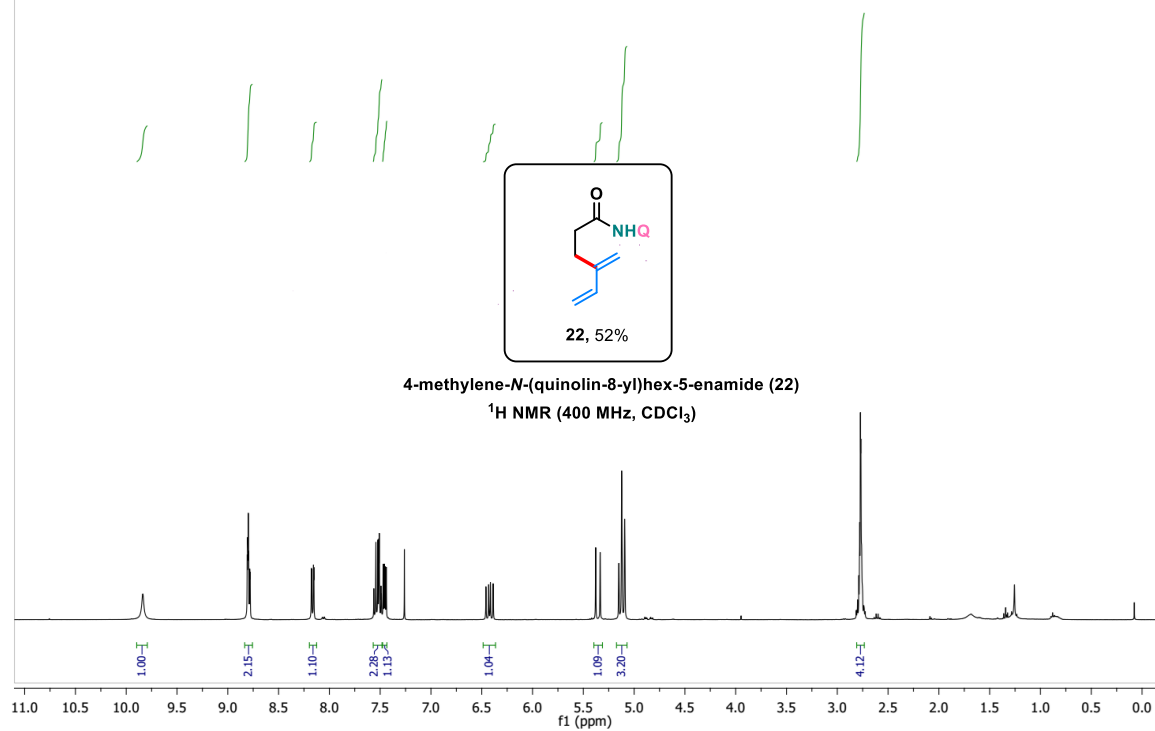

CMRV-RS-89-B2-13C  
CMRV-RS-89-B2-13C

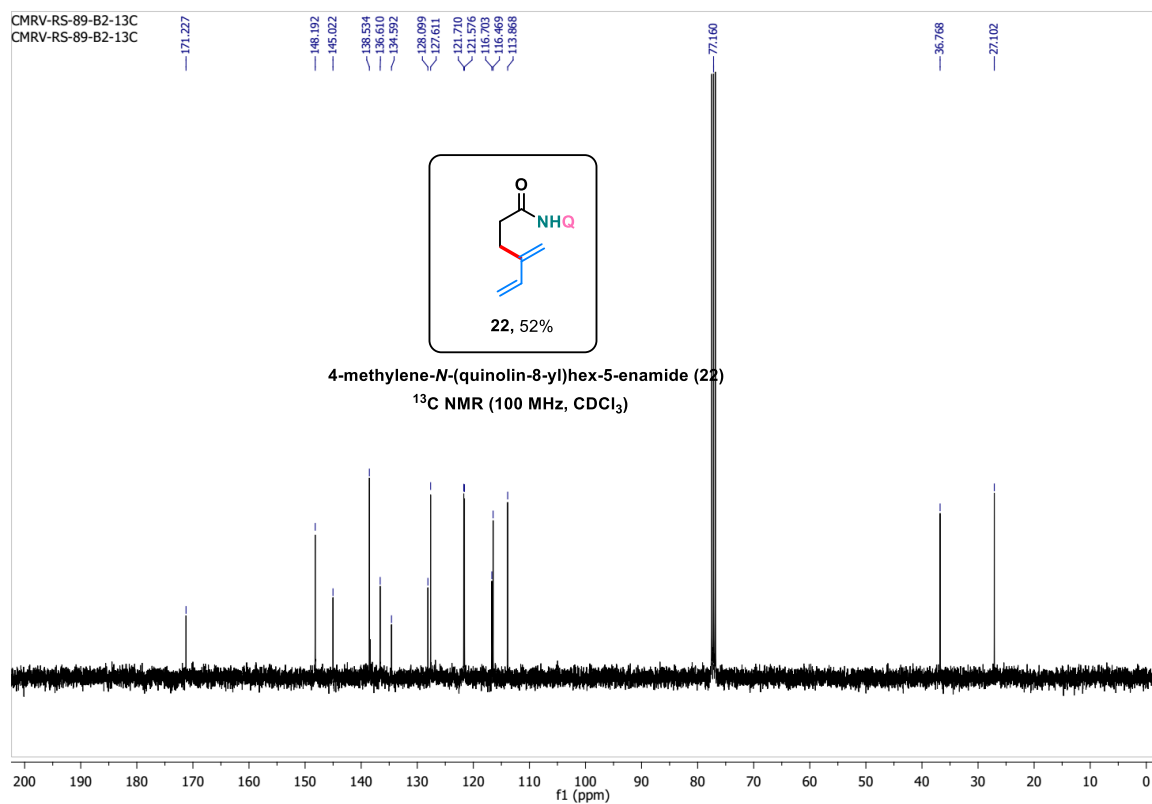

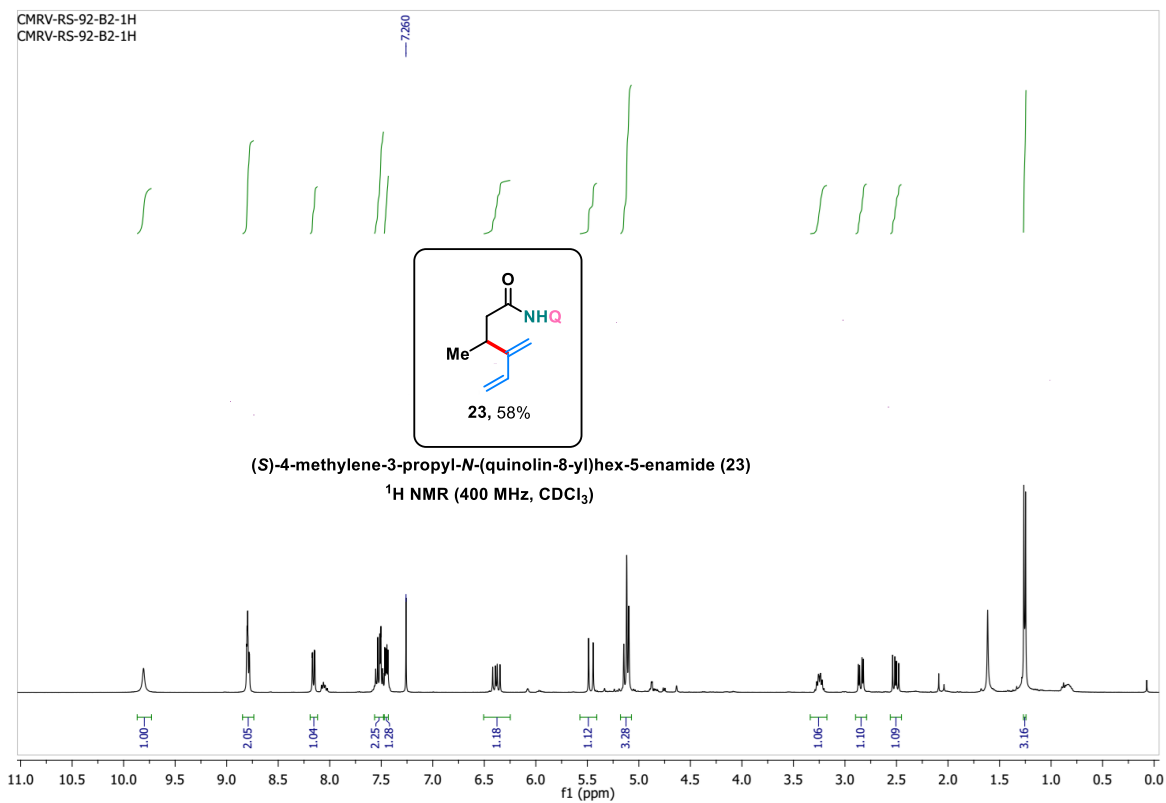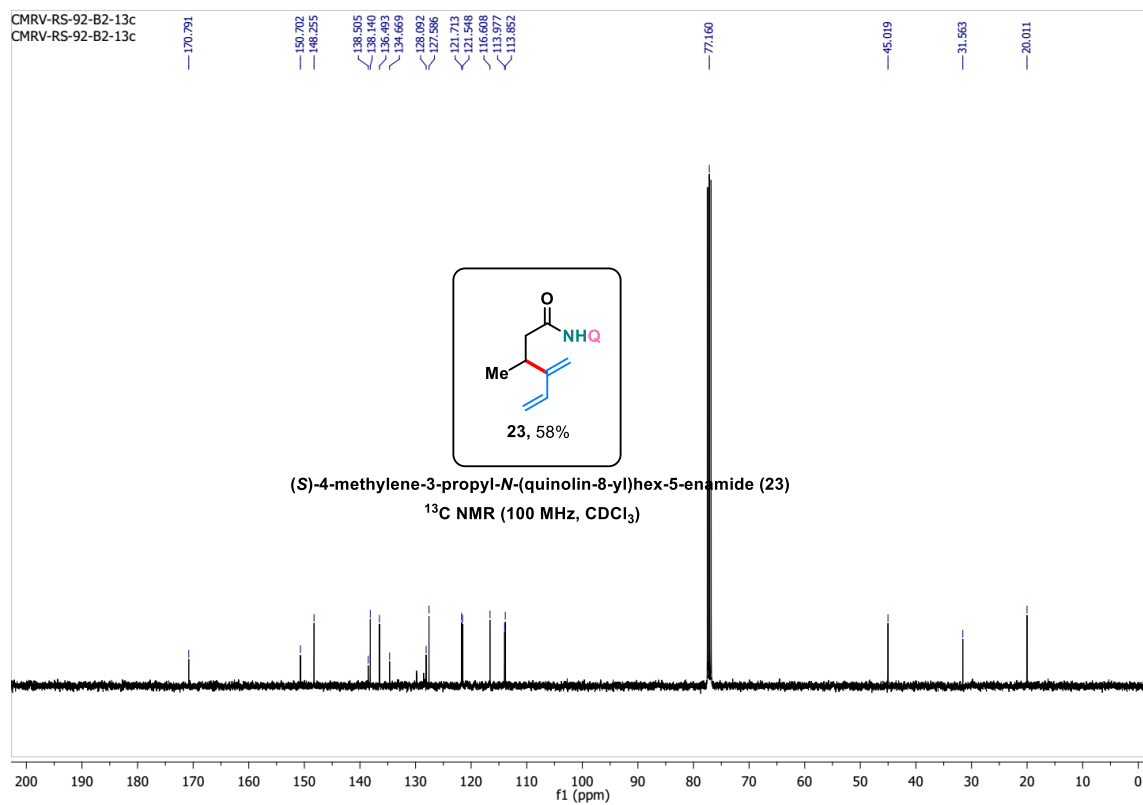

CMRV-AN-2-111-1H  
CMRV-AN-2-111-1H

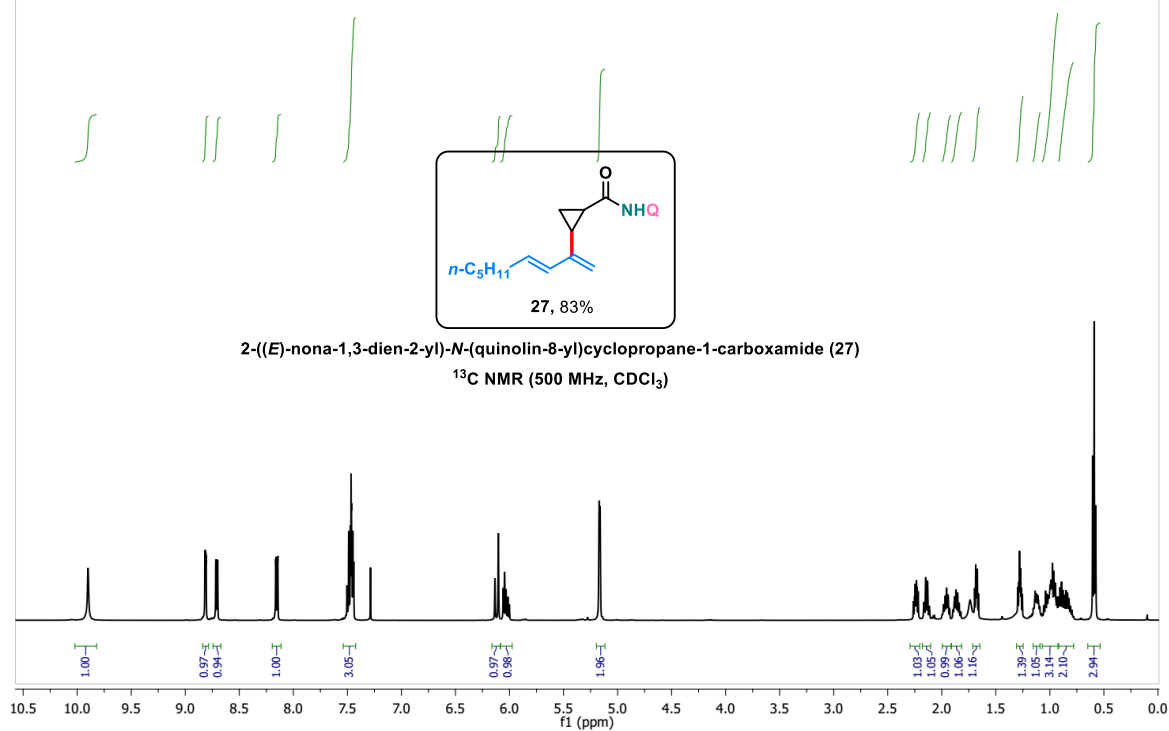

CMRV-AN-2-111-13C  
CMRV-AN-2-111-13C

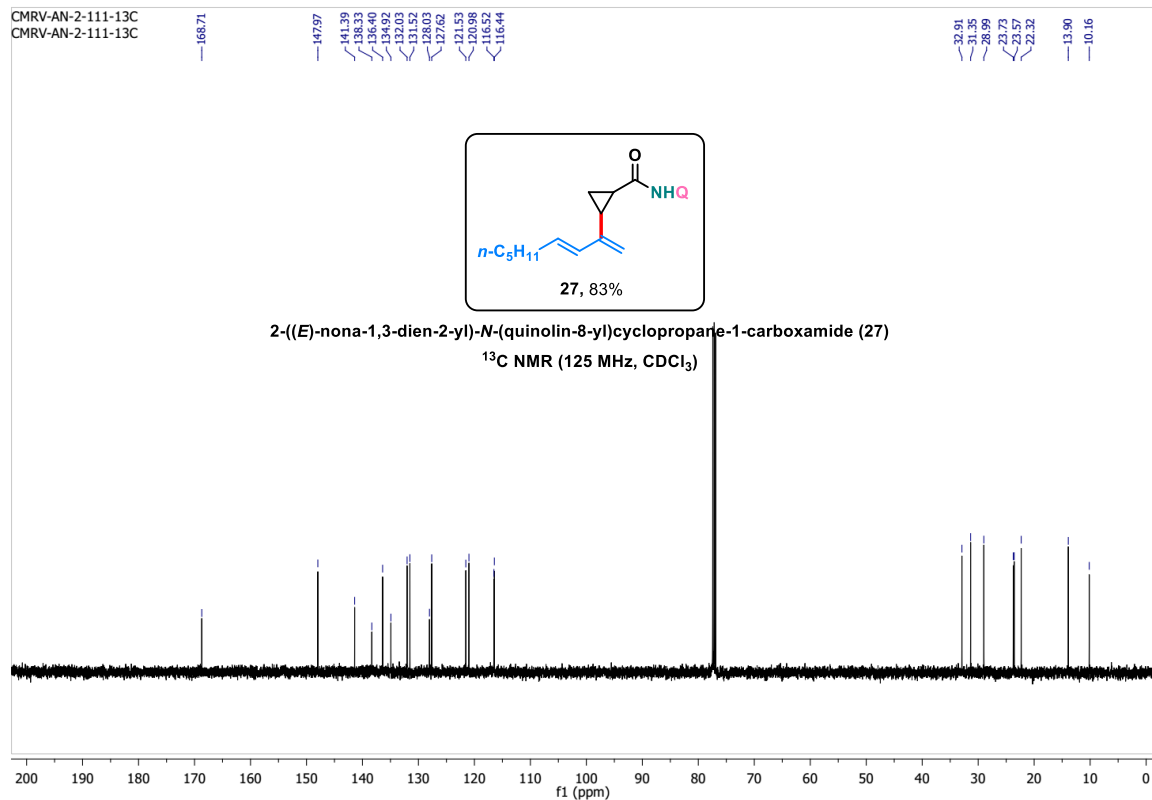

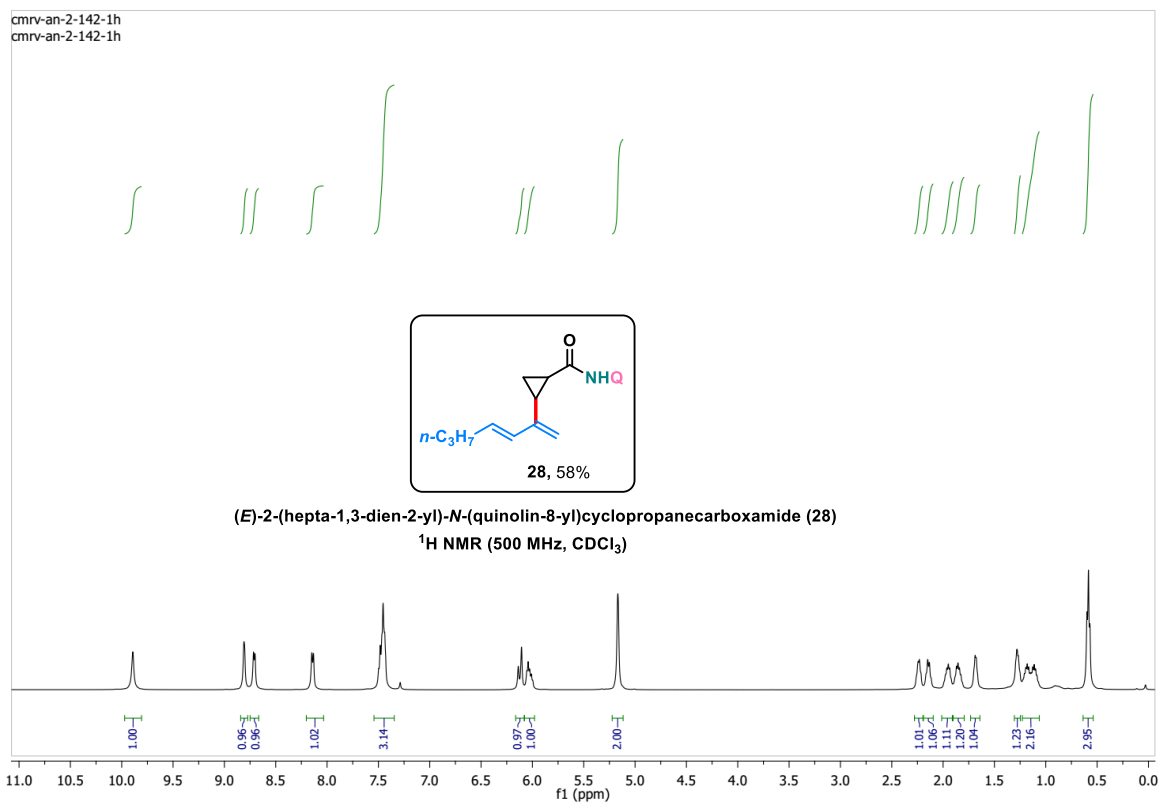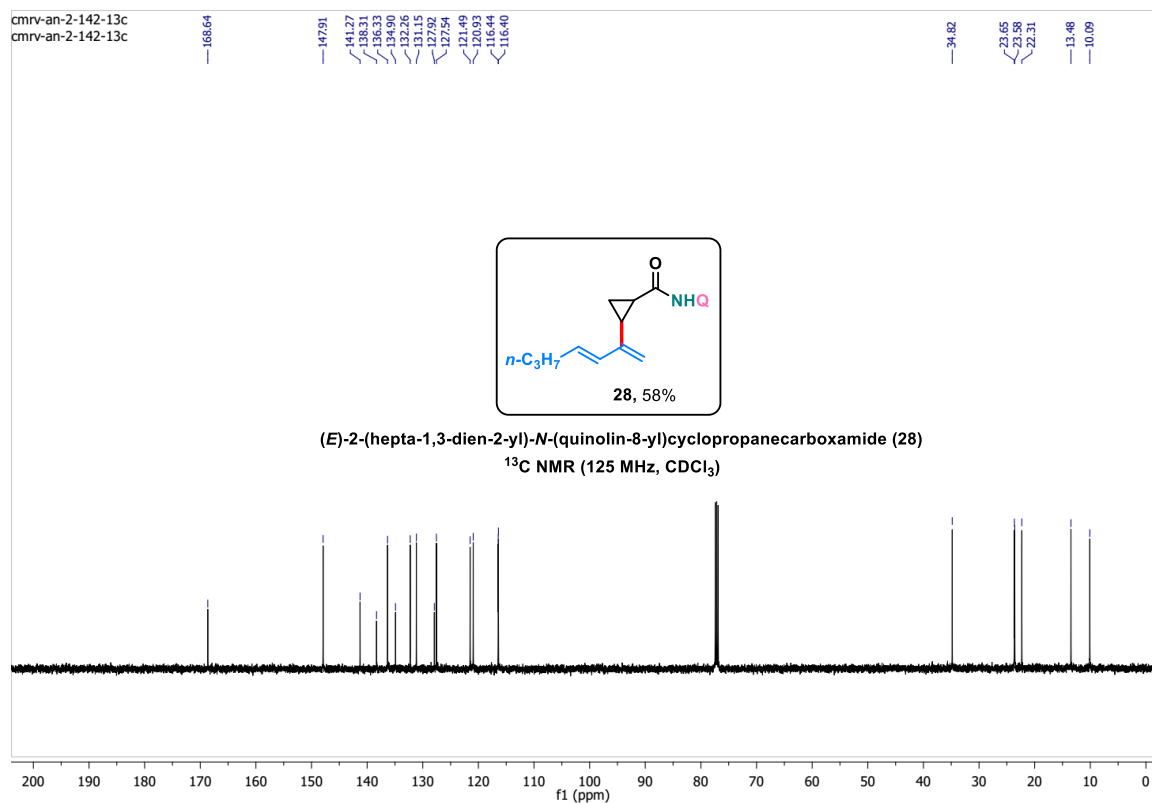

CMRV-RS-643-1H  
CMRV-RS-643-1H

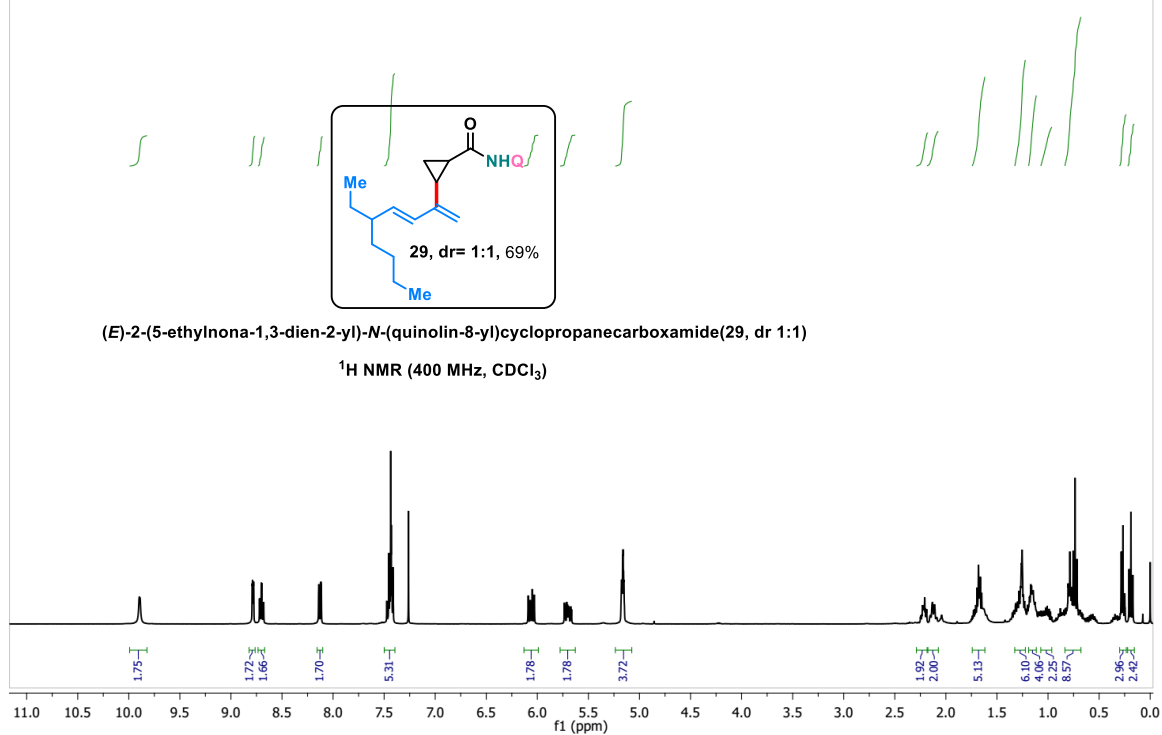

CMRV-RS-643-13C  
CMRV-RS-643-13C

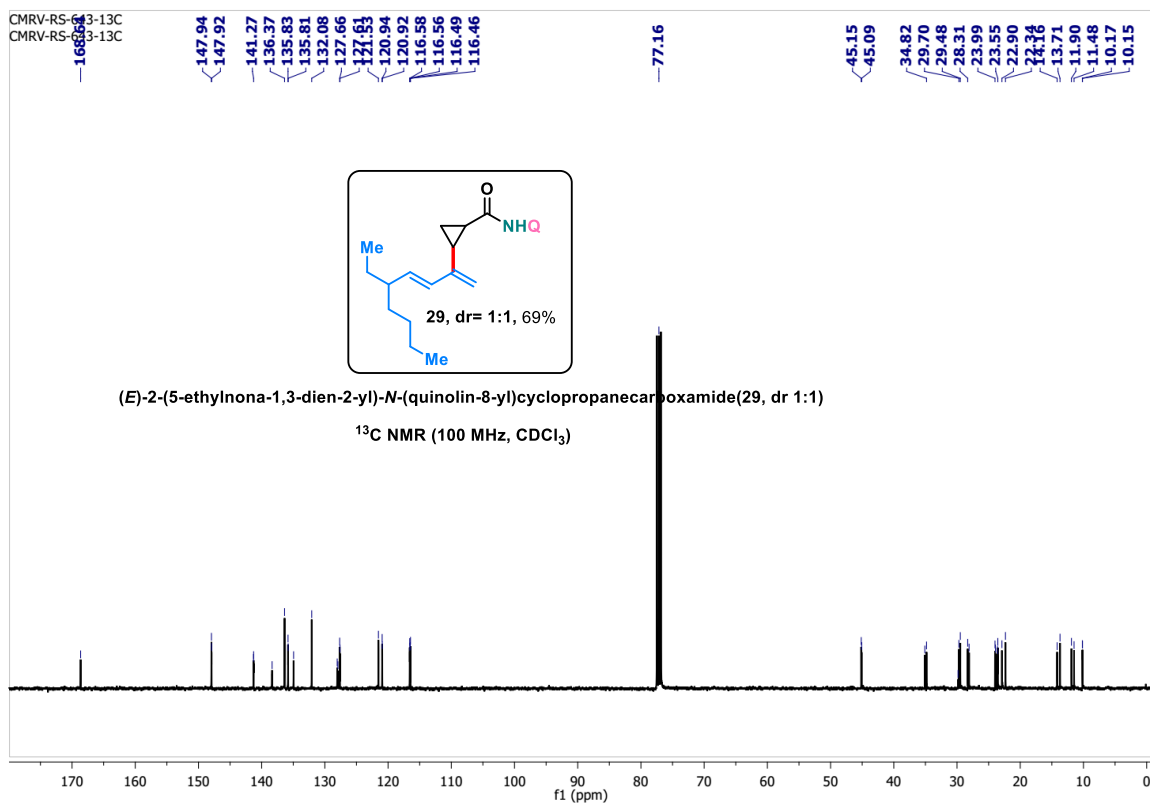



CMRV-RS-1251-1H  
CMRV-RS-1251-1H

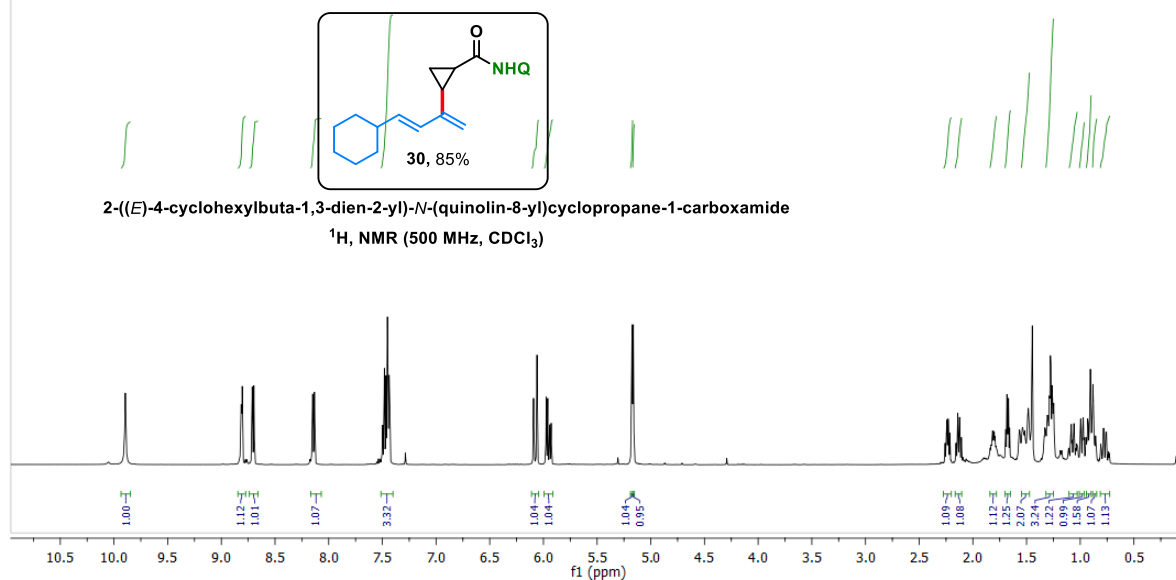

CMRV-RS-1251-13C  
CMRV-RS-1251-13C

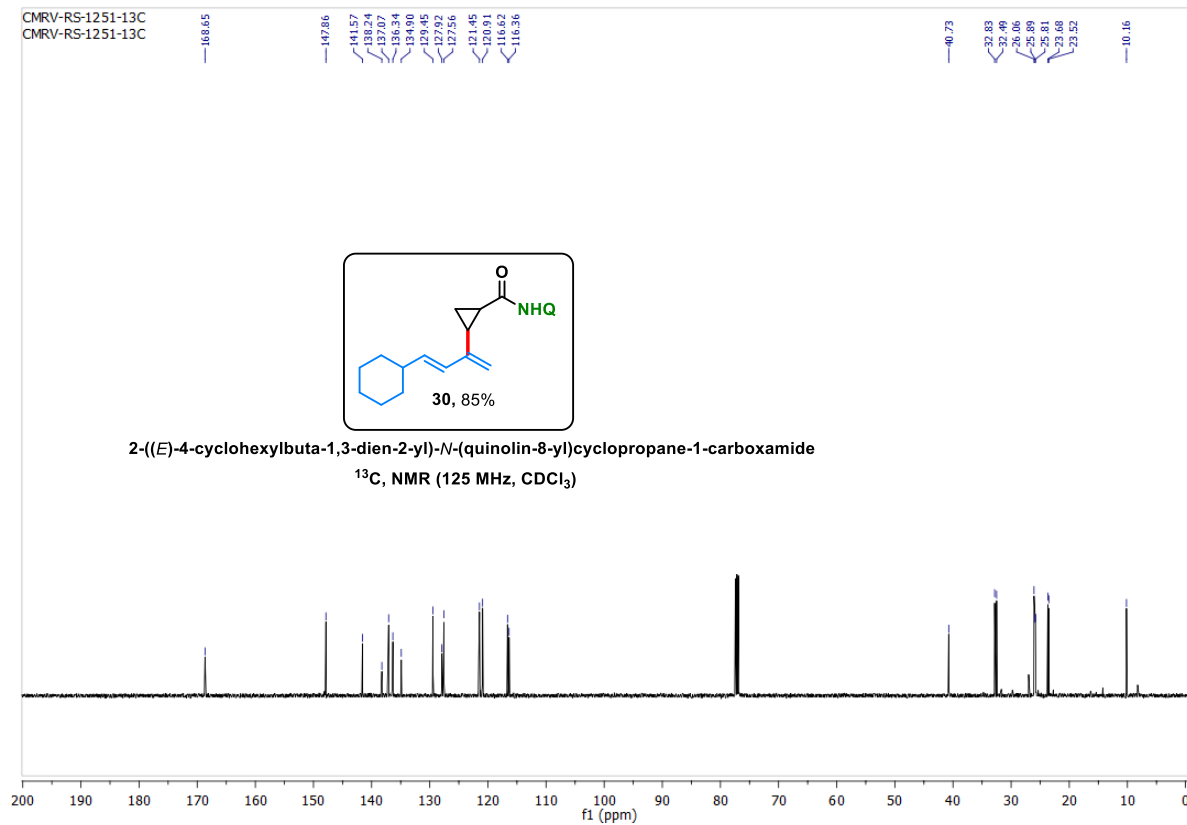

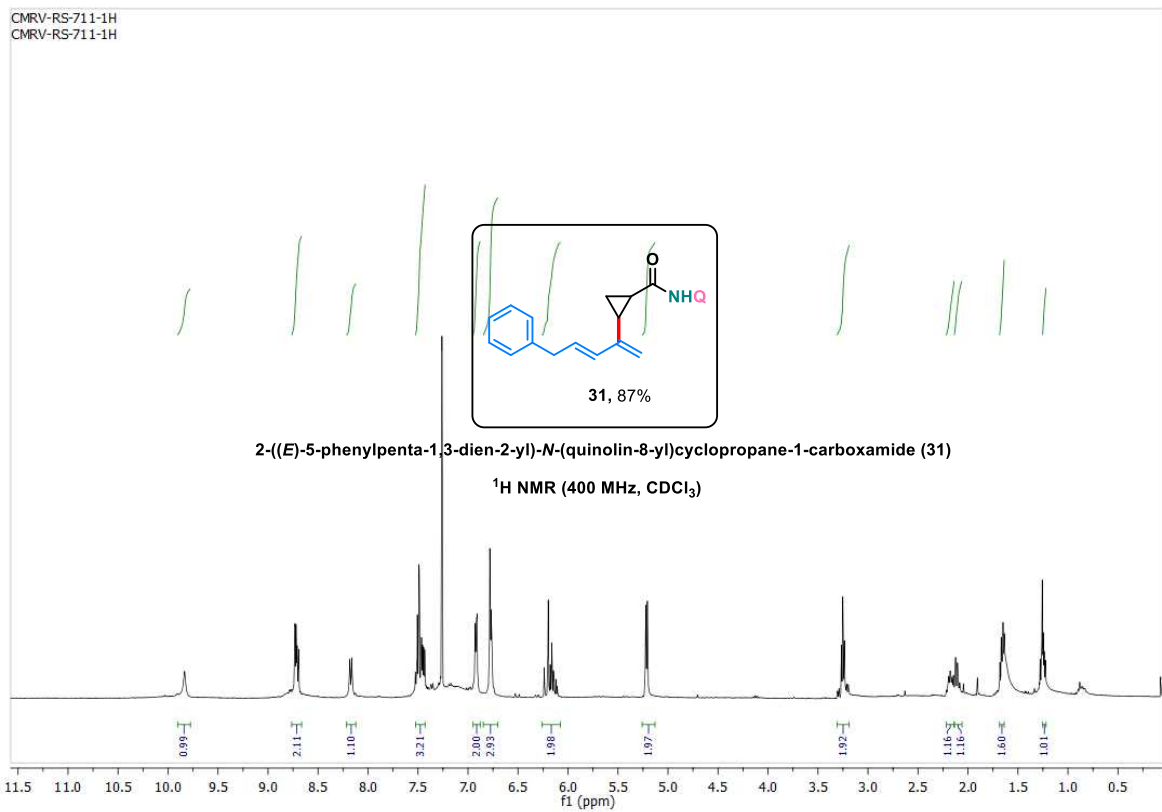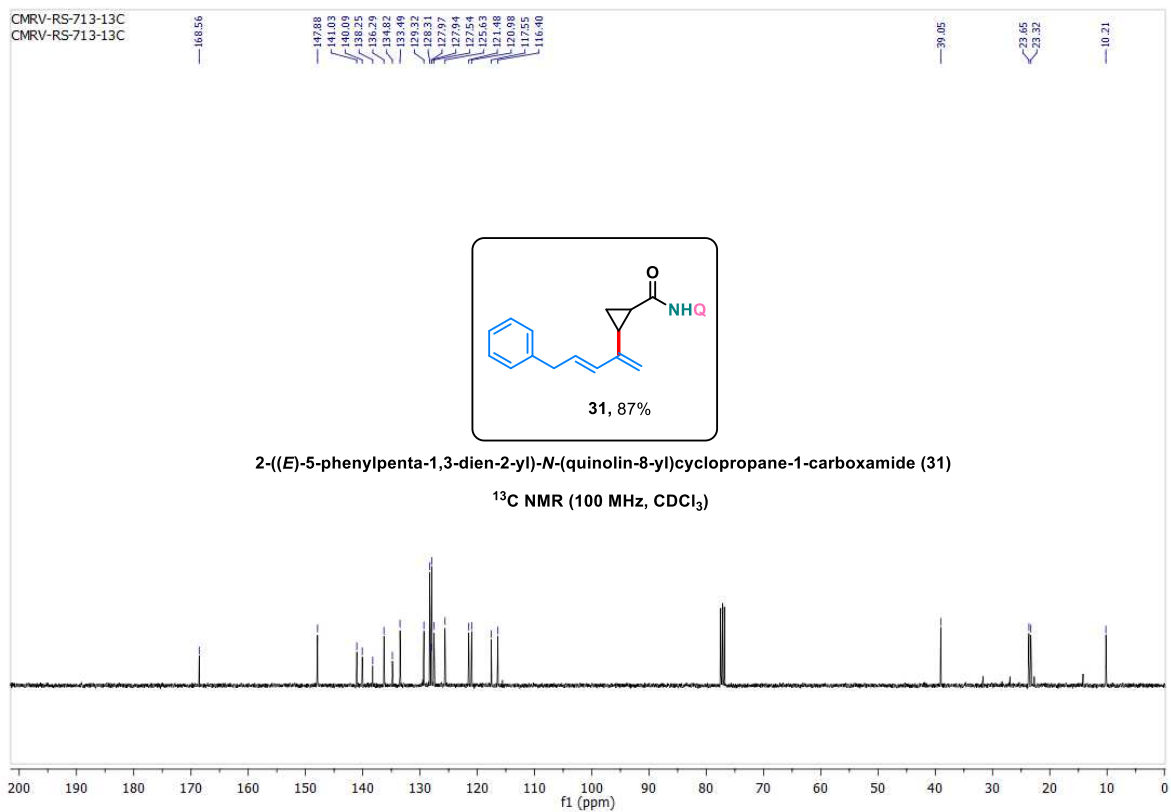

CMRV-RS-775-B-1H  
CMRV-RS-775-B-1H

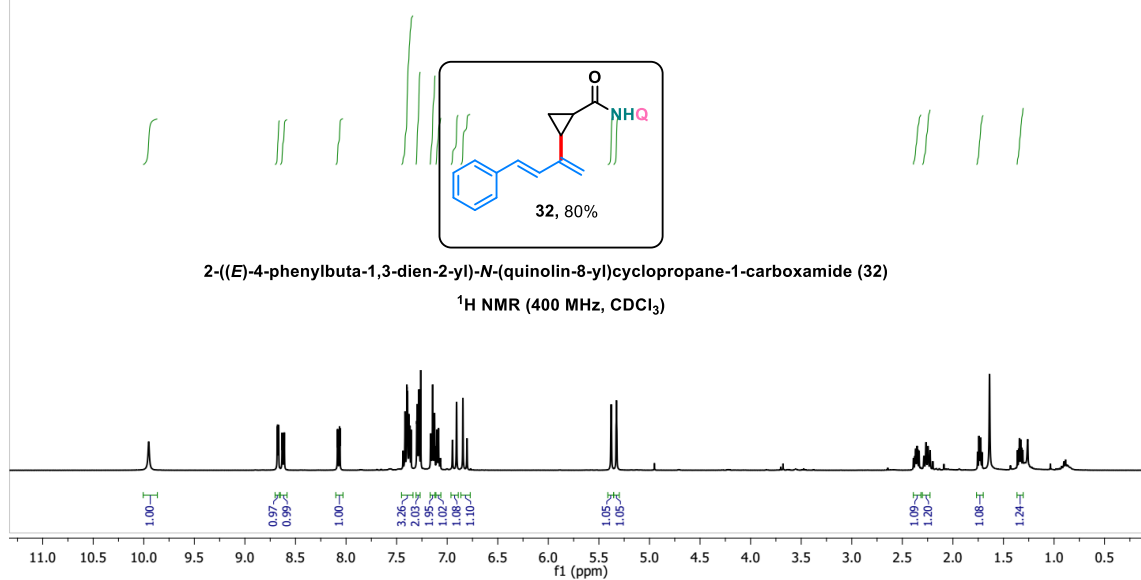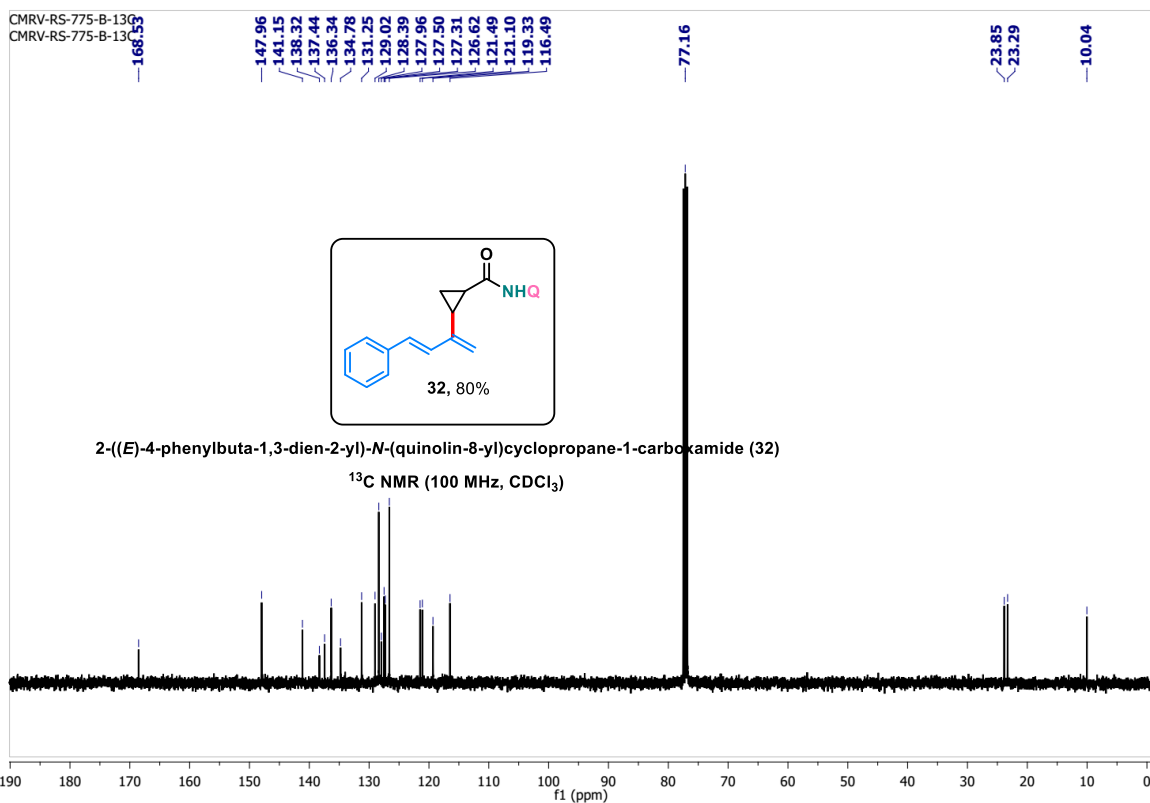

CMRV-RS-775-C-1H  
CMRV-RS-775-C-1H

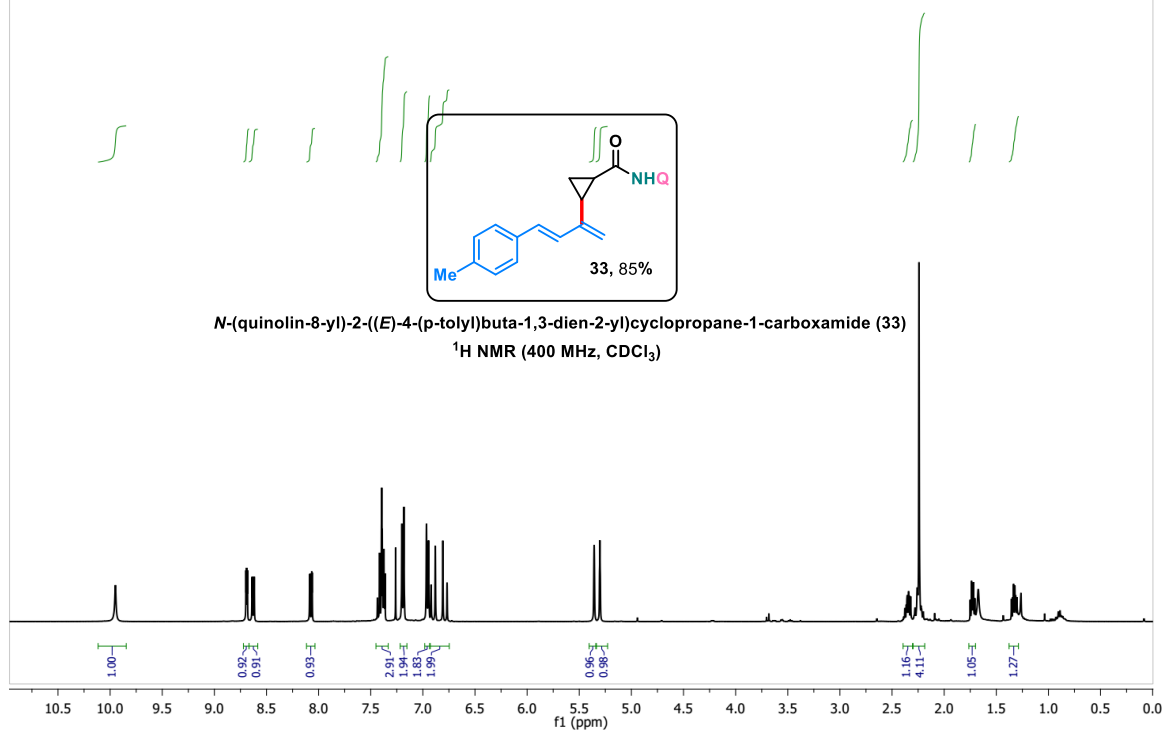

CMRV-RS-775-C-13C  
CMRV-RS-775-C-13C

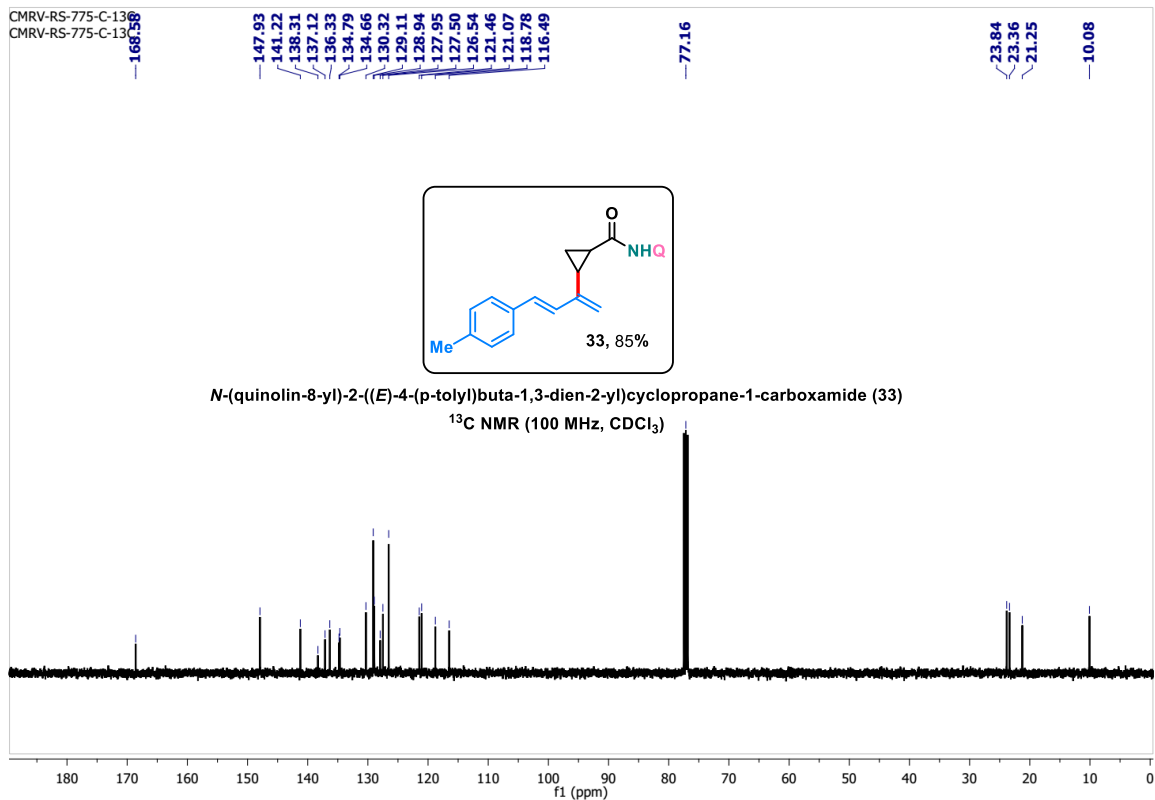

CMRV-RS-868-1H.12.fid  
CMRV-RS-868-1H

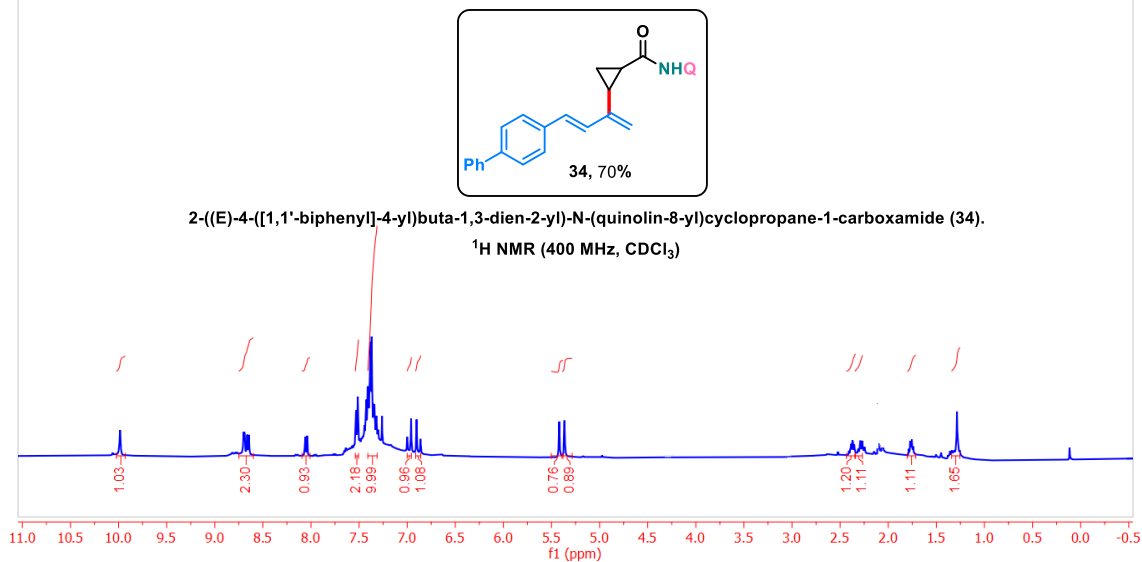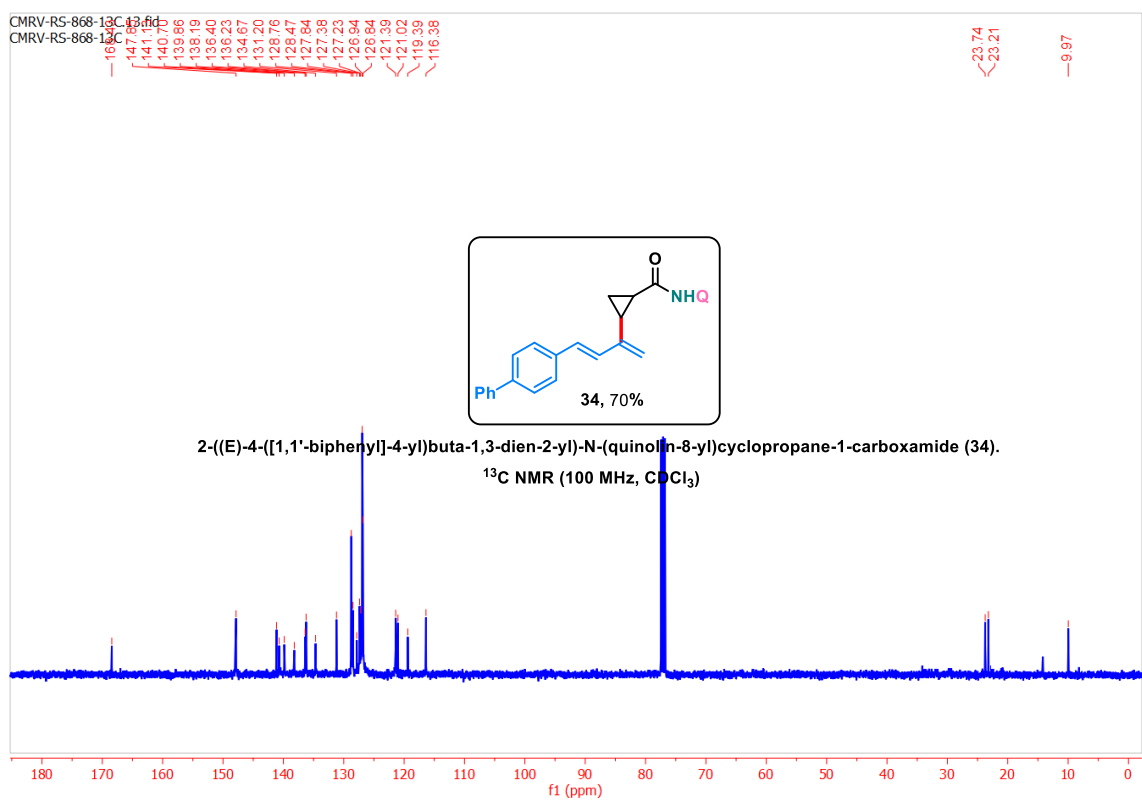

CMRV-RS-775-A-1H.1.fid  
CMRV-RS-775-A-1H

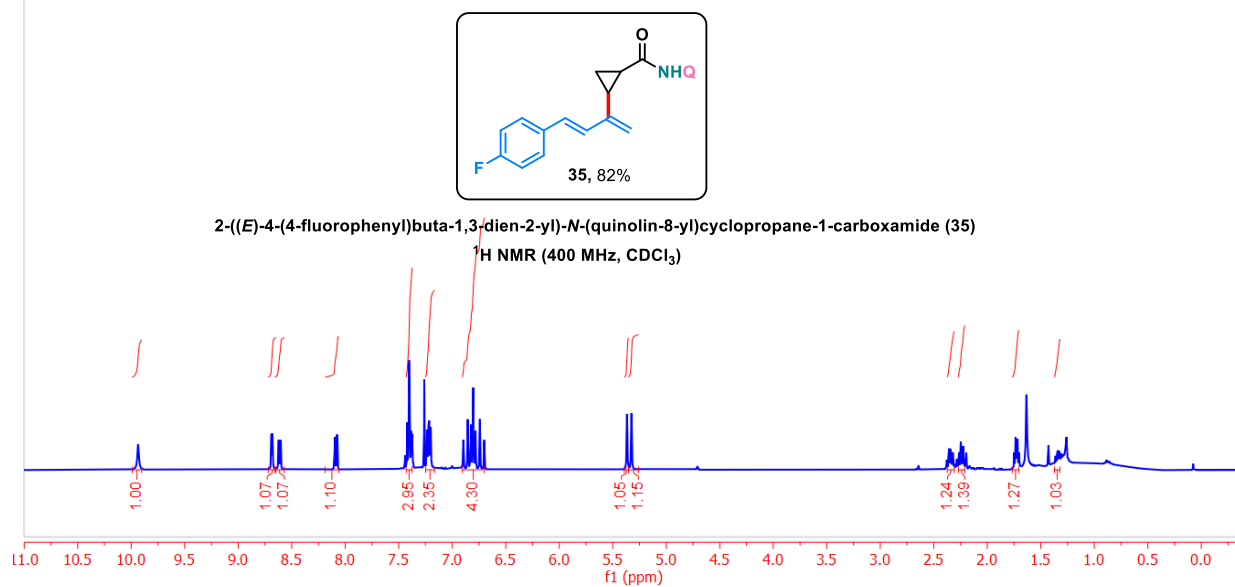

CMRV-RS-775-A-13C2.fid  
CMRV-RS-775-A-13C2

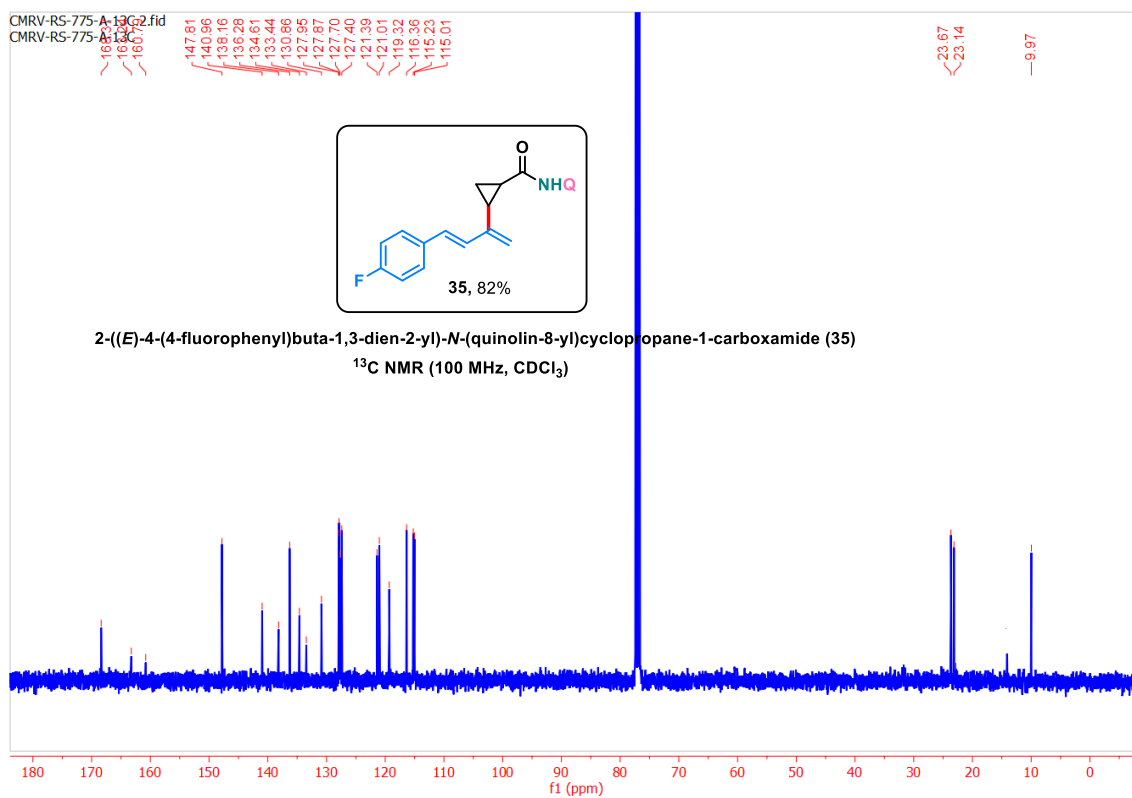

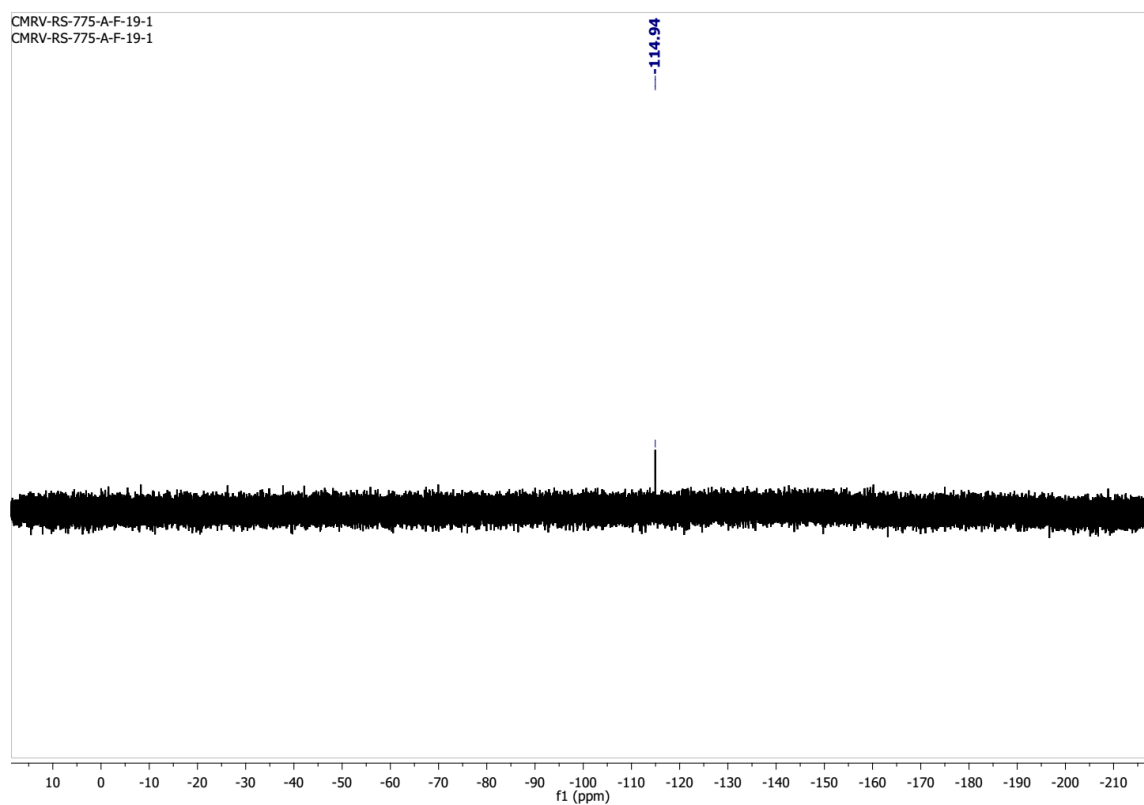

CMRV-RS-729-1H  
CMRV-RS-729-1H

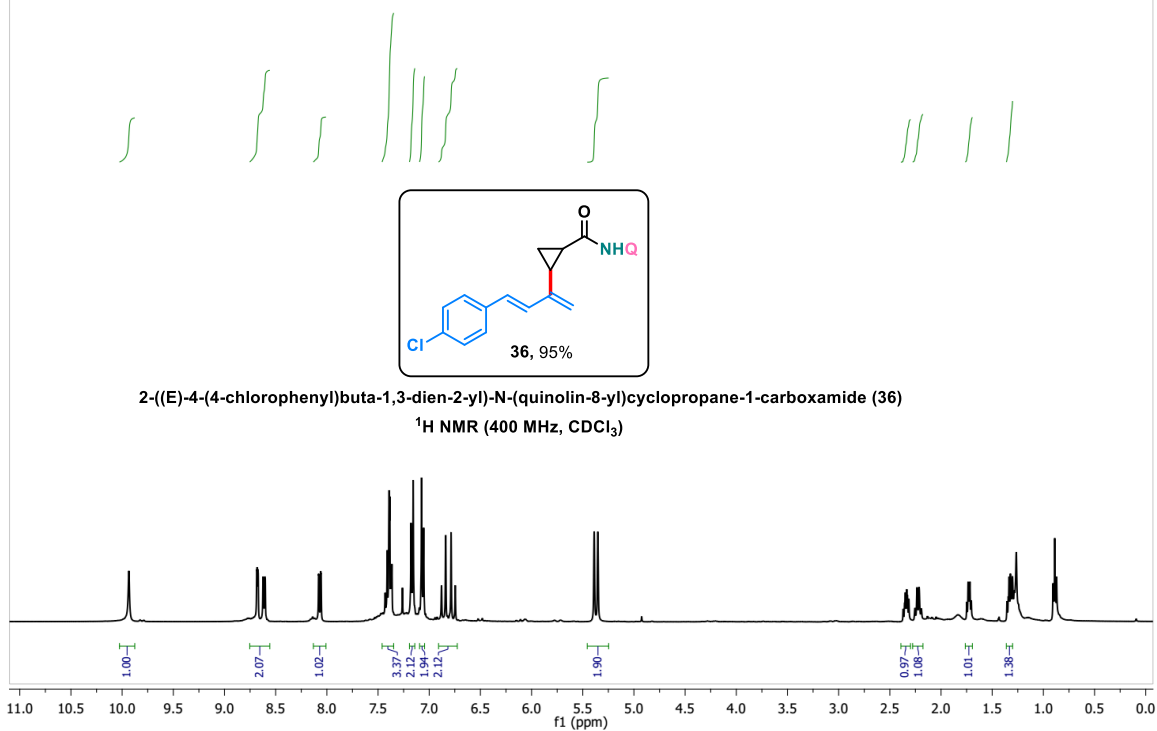

CMRV-RS-729-13C-1  
CMRV-RS-729-13C-1

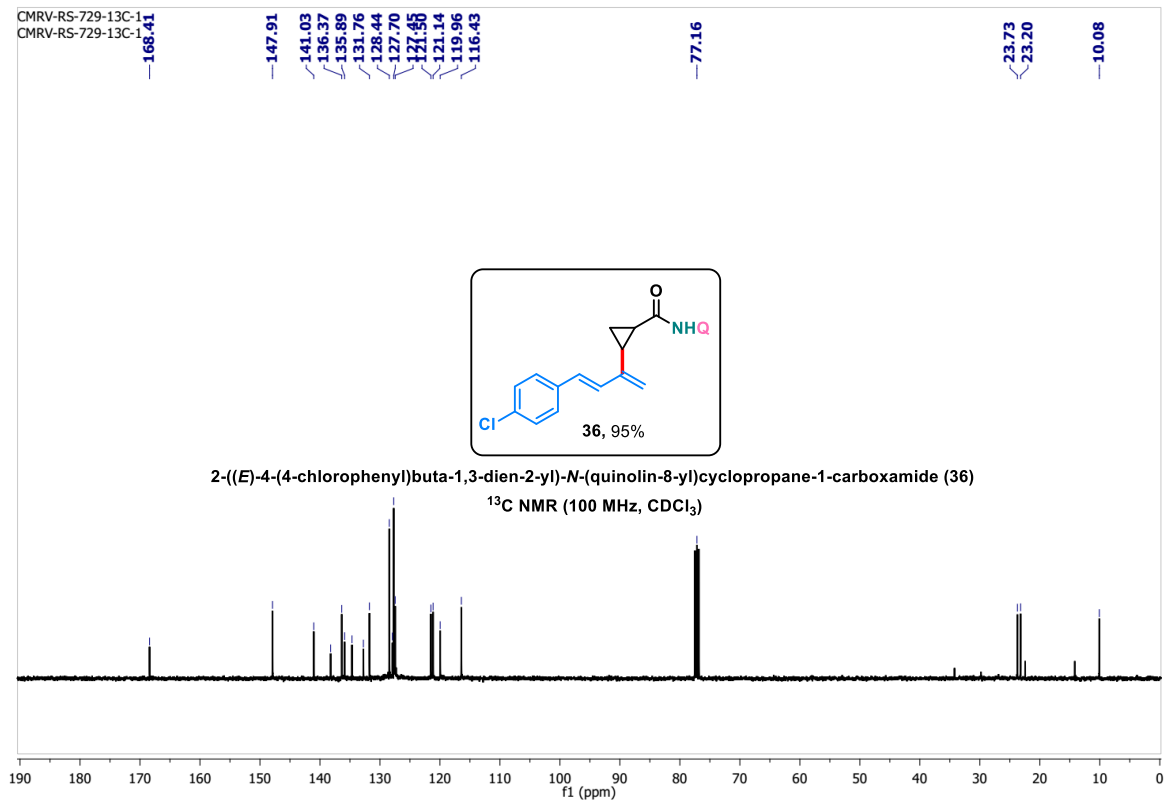



CMRV-RS-863-1H.1.fid  
CMRV-RS-863-1H

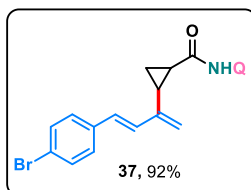

2-((E)-4-(4-bromophenyl)buta-1,3-dien-2-yl)-N-(quinolin-8-yl)cyclopropane-1-carboxamide (37)

$^1\text{H}$  NMR (400 MHz,  $\text{CDCl}_3$ )

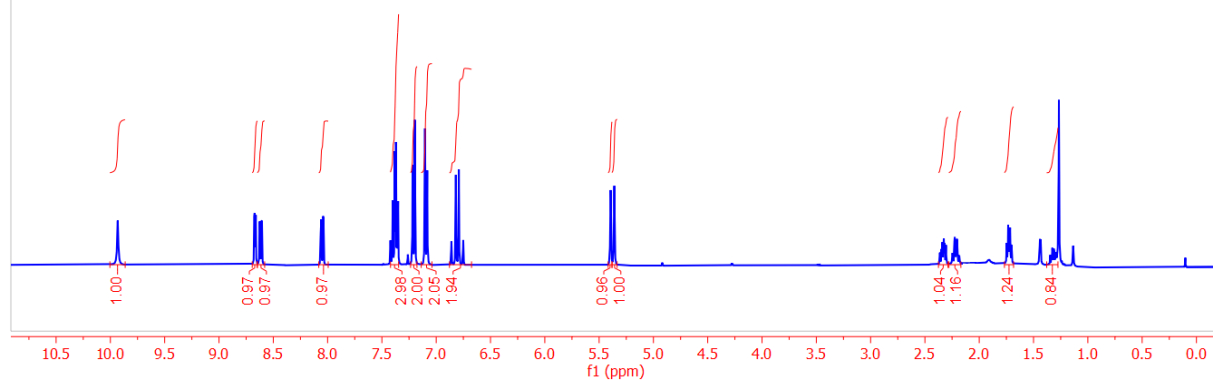

CMRV-RS-863-13C.2.fid  
CMRV-RS-863-13C

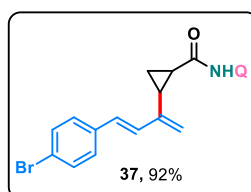

2-((E)-4-(4-bromophenyl)buta-1,3-dien-2-yl)-N-(quinolin-8-yl)cyclopropane-1-carboxamide (37)

$^{13}\text{C}$  NMR (100 MHz,  $\text{CDCl}_3$ )

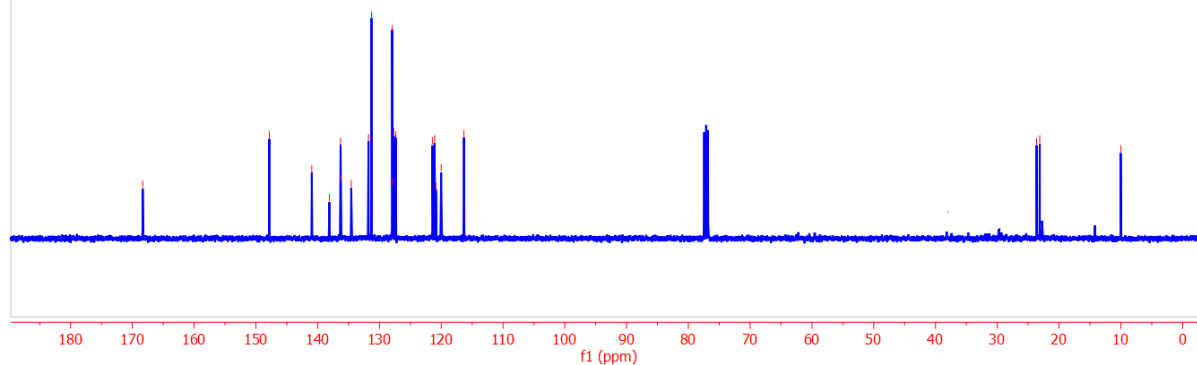

CMRV-RS-867-1H  
CMRV-RS-867-1H

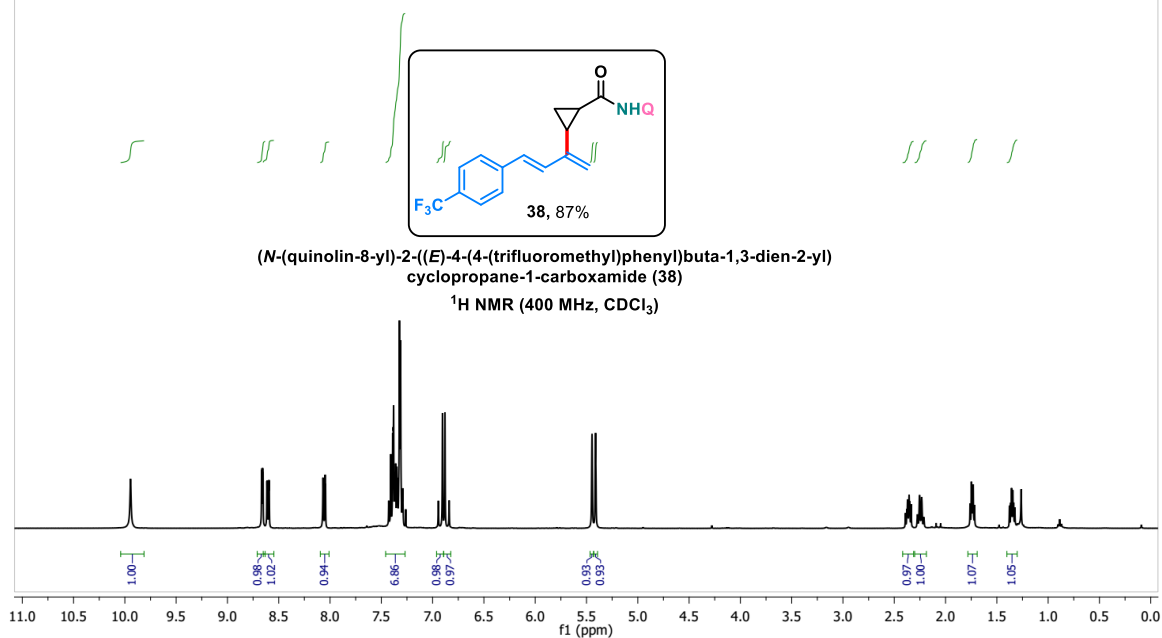

CMRV-RS-867-13C  
CMRV-RS-867-13C

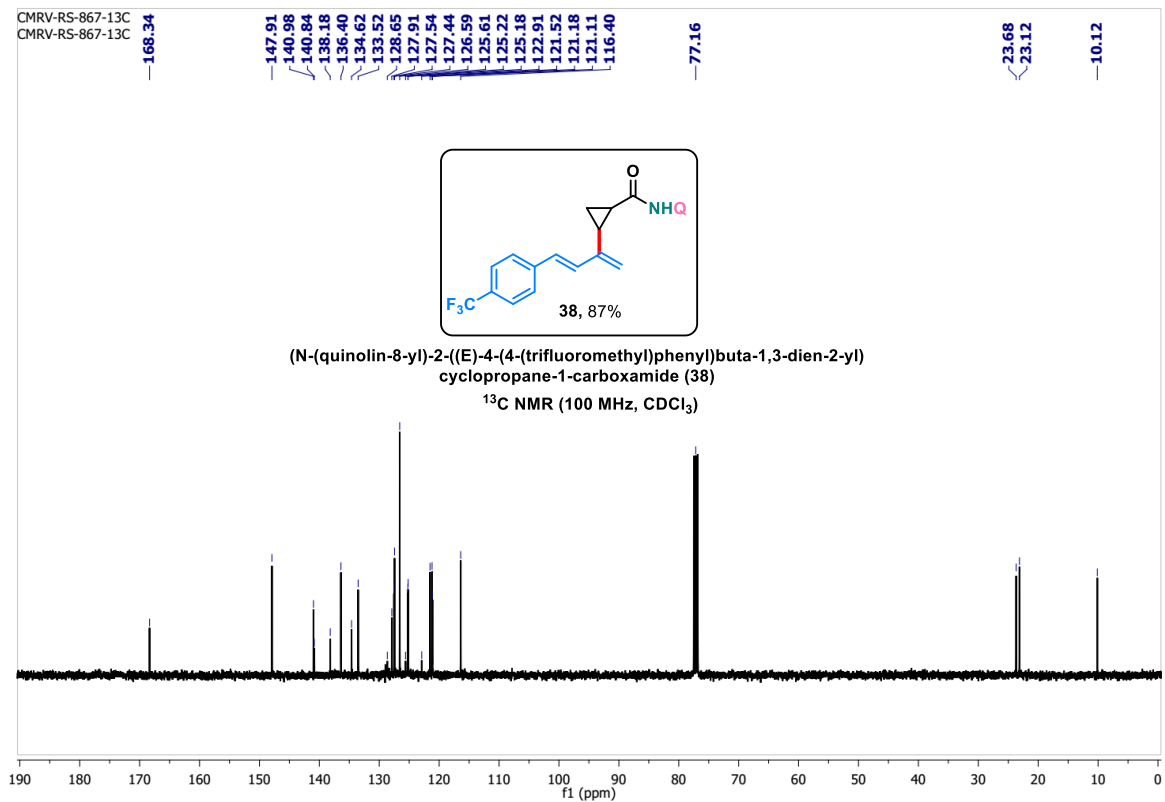

CMRV-RS-849-1H  
CMRV-RS-849-1H

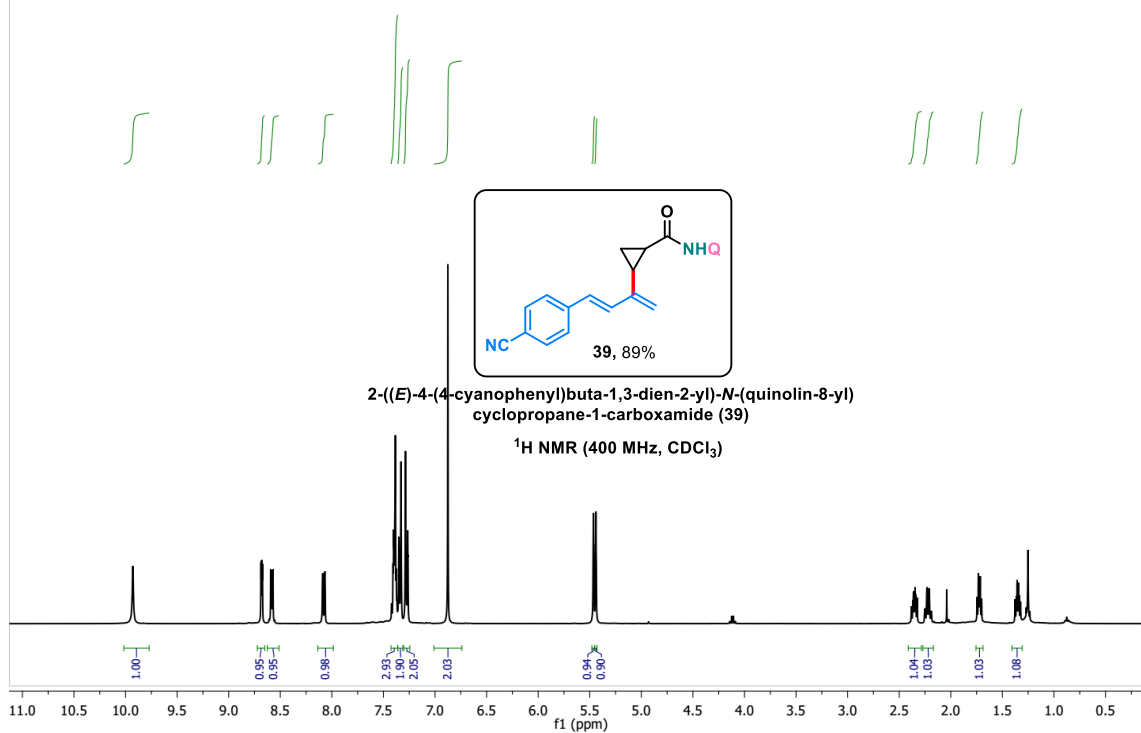

CMRV-RS-849-13C  
CMRV-RS-849-13C

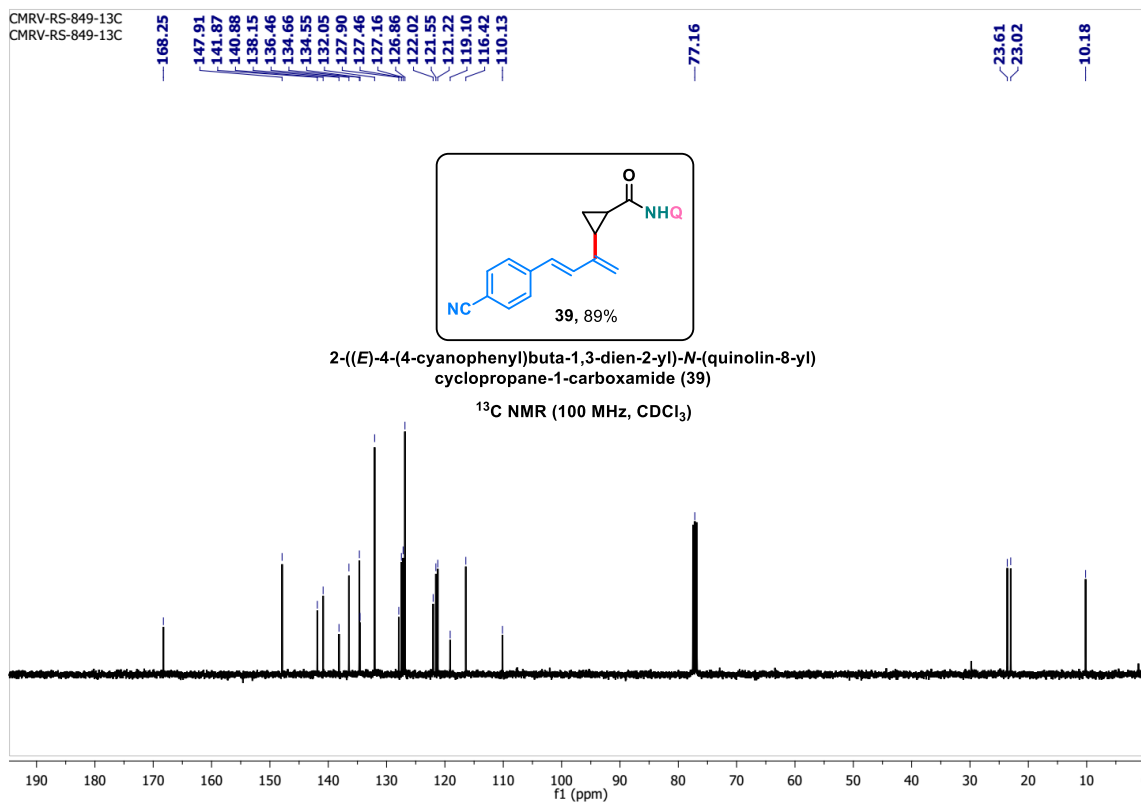

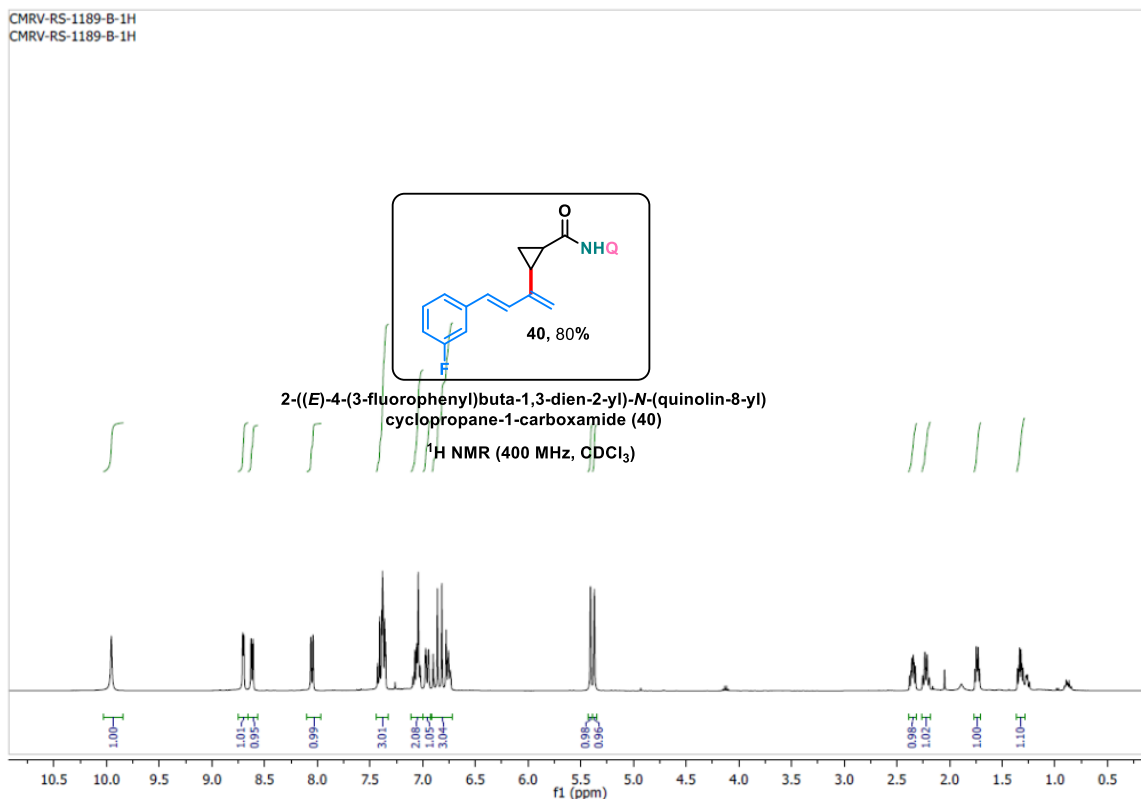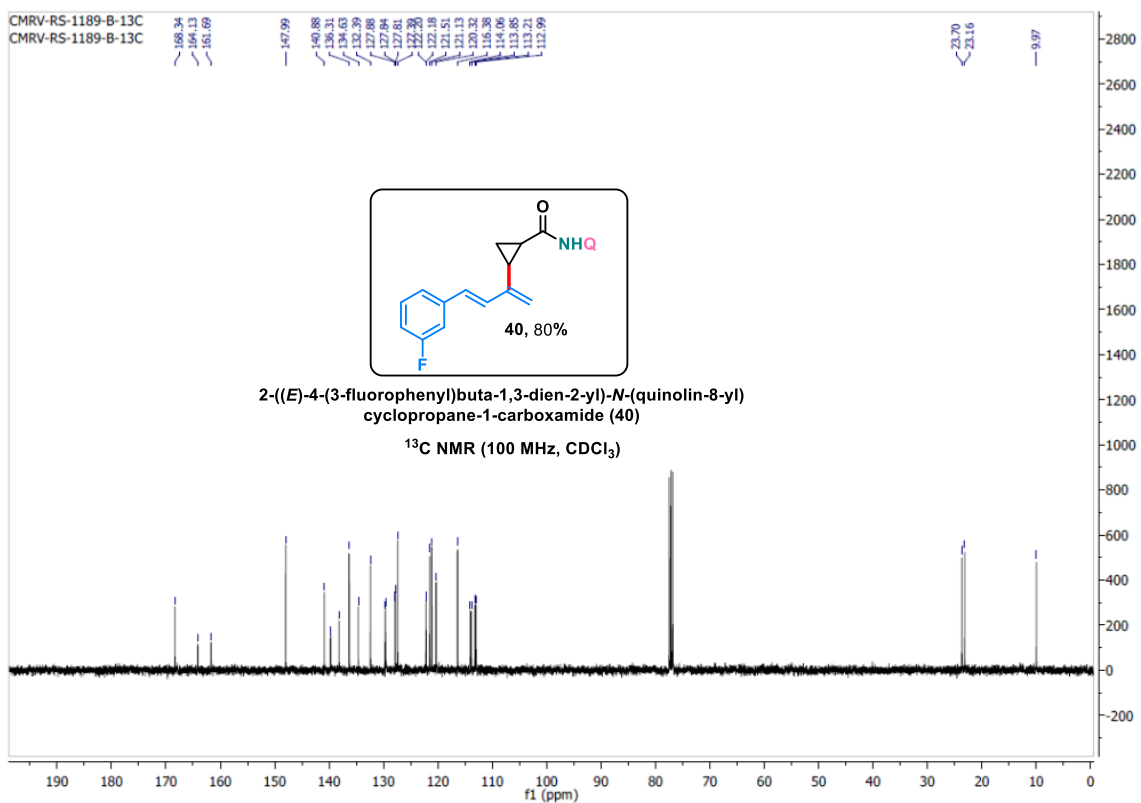

CMRV-RS-1189-A-1H  
CMRV-RS-1189-A-1H

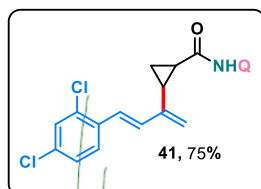

2-((E)-4-(2,4-dichlorophenyl)buta-1,3-dien-2-yl)-N-(quinolin-8-yl)  
cyclopropane-1-carboxamide (41)  
<sup>1</sup>H NMR (400 MHz, CDCl<sub>3</sub>)

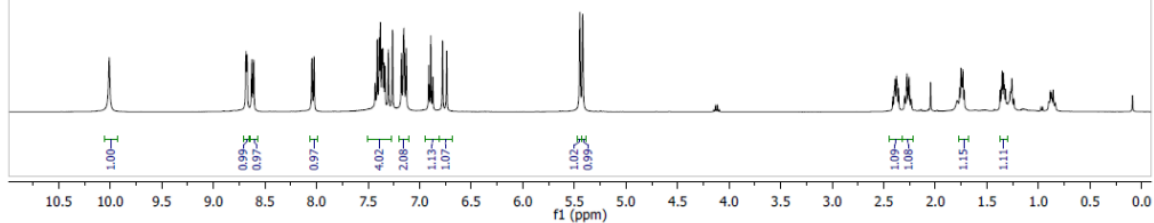

CMRV-RS-1189-A-13C  
CMRV-RS-1189-A-13C

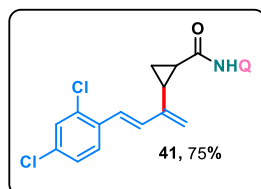

2-((E)-4-(2,4-dichlorophenyl)buta-1,3-dien-2-yl)-N-(quinolin-8-yl)  
cyclopropane-1-carboxamide (41)  
<sup>13</sup>C NMR (100 MHz, CDCl<sub>3</sub>)

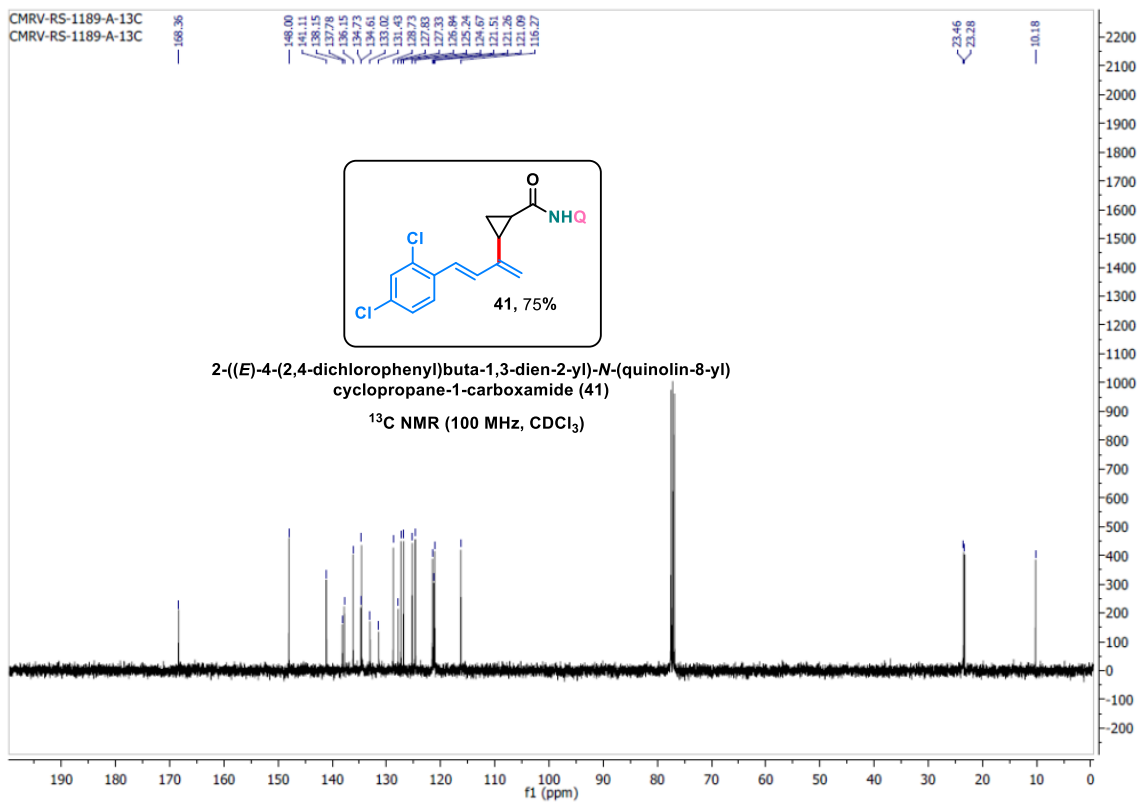

CMRV-RS-884-1H  
CMRV-RS-884-1H

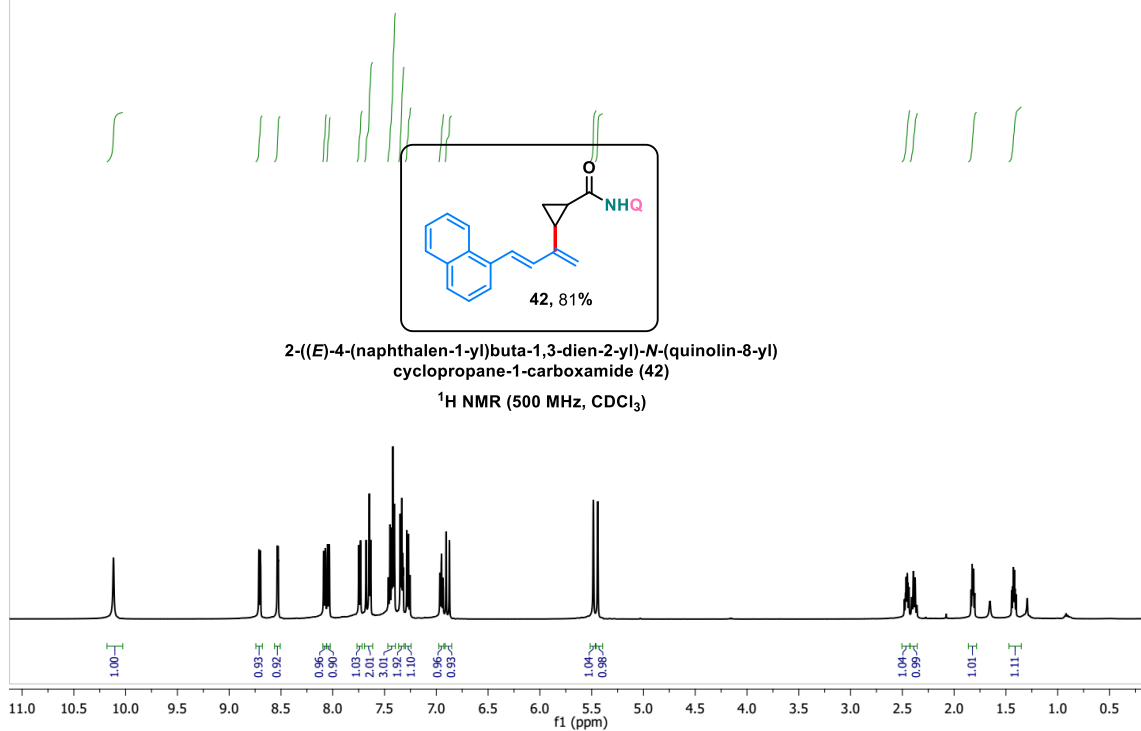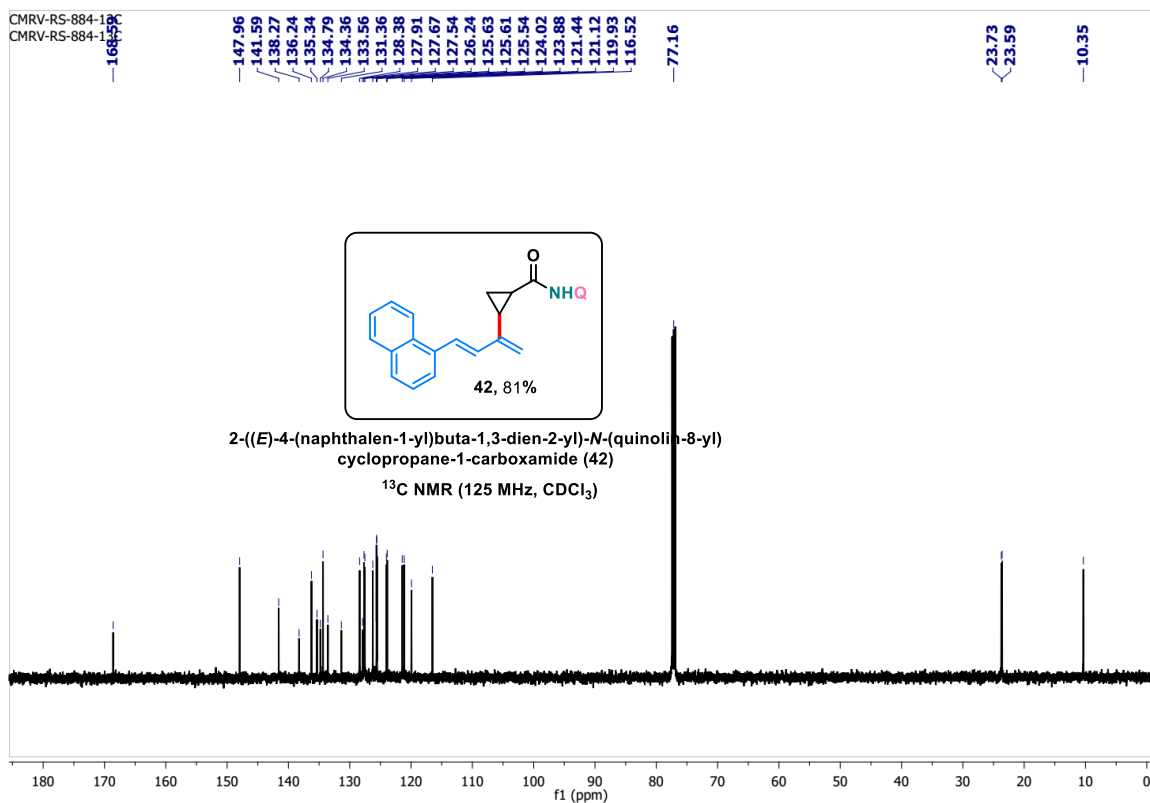

CMRV-AN-2-116-B-1H  
CMRV-AN-2-116-B-1H

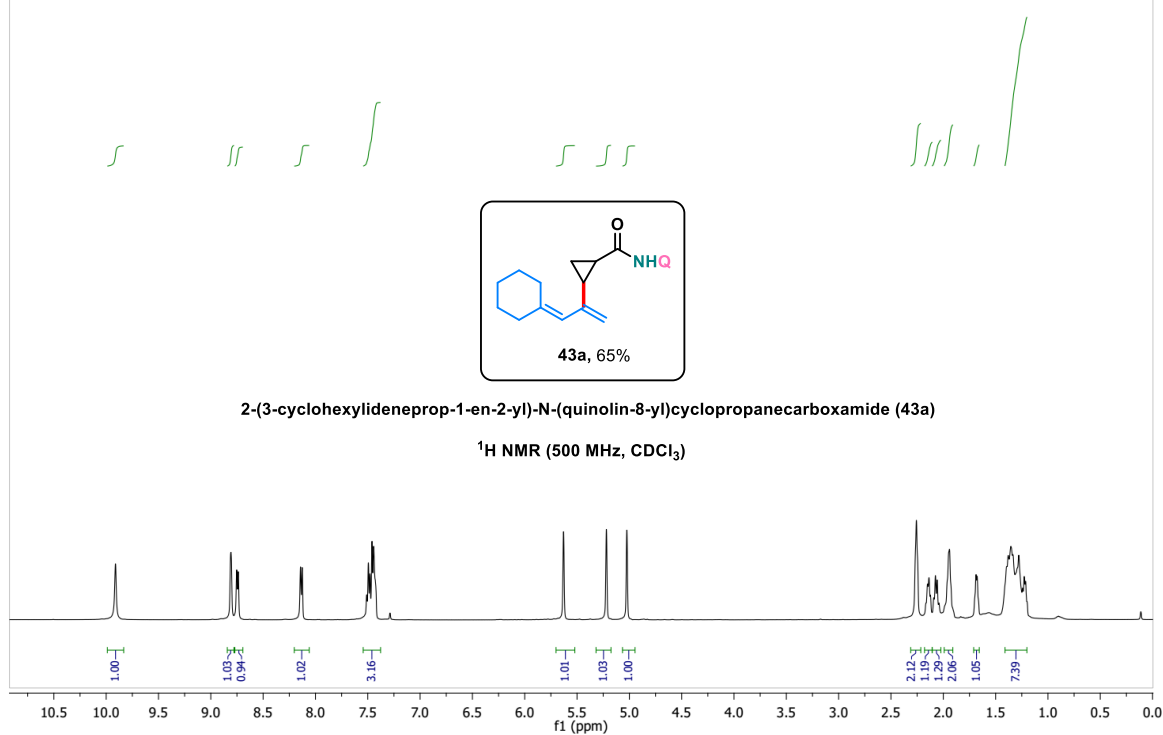

CMRV-AN-2-116-B-13C  
CMRV-AN-2-116-B-13C

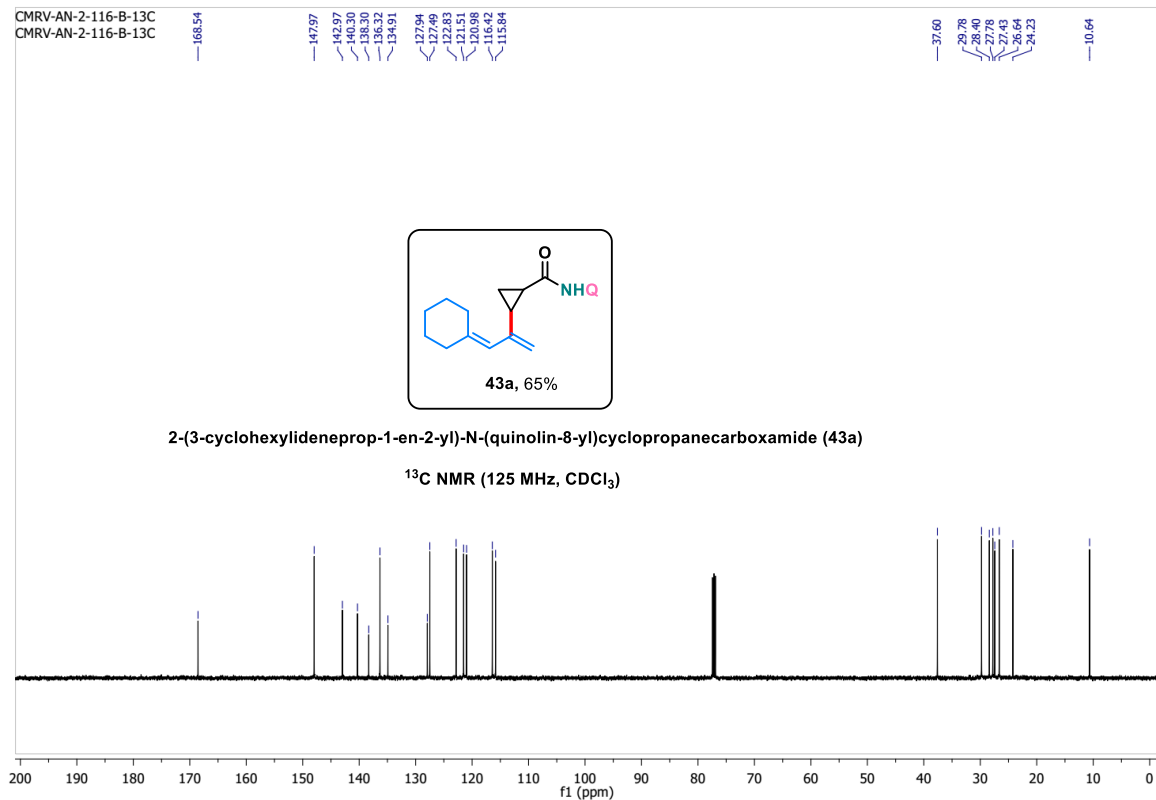

CMRV-AN-2-138-1H  
CMRV-AN-2-138-1H

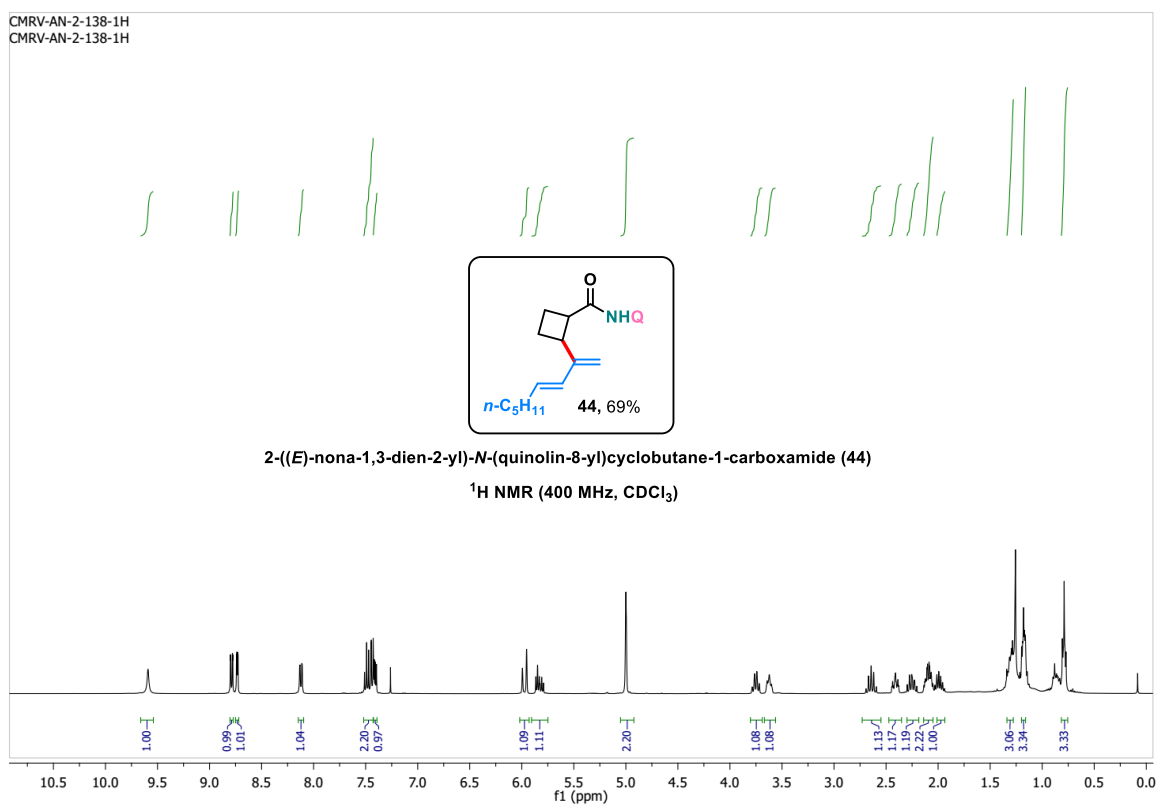

CMRV-AN-2-138-13c  
CMRV-AN-2-138-13c

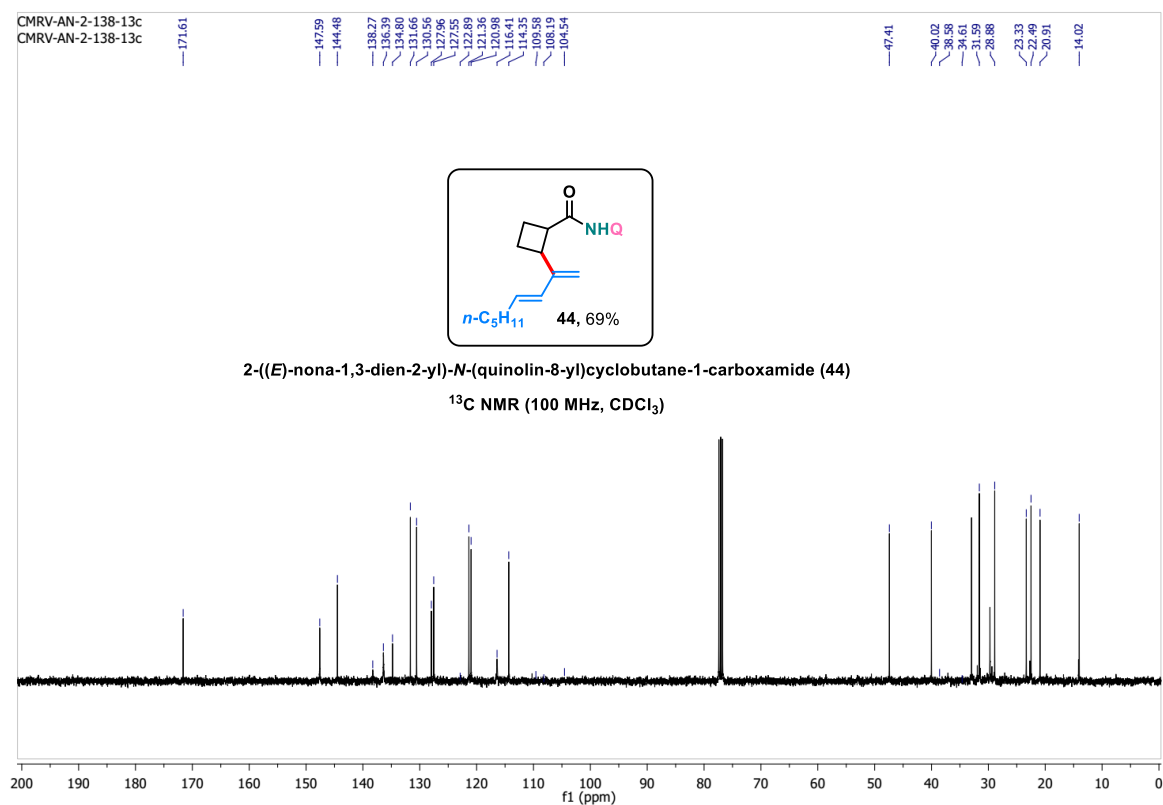



CMRV-RS-617-1H  
CMRV-RS-617-1H

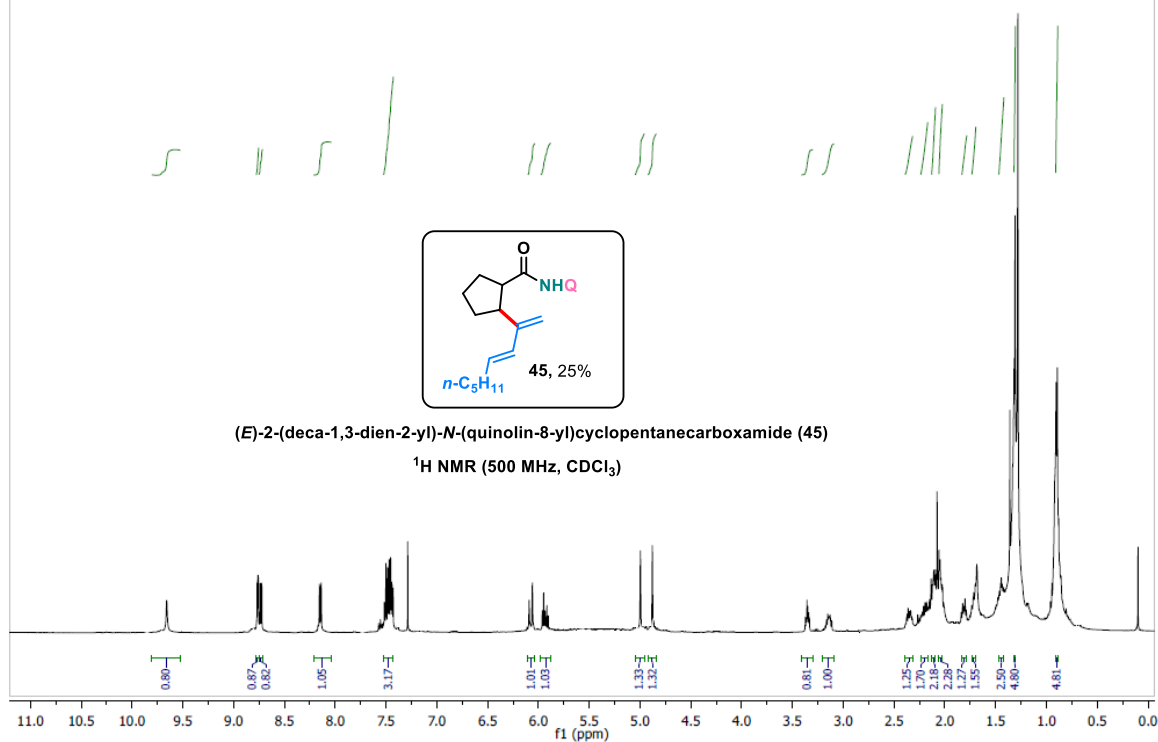

CMRV-RS-617-13C  
CMRV-RS-617-13C

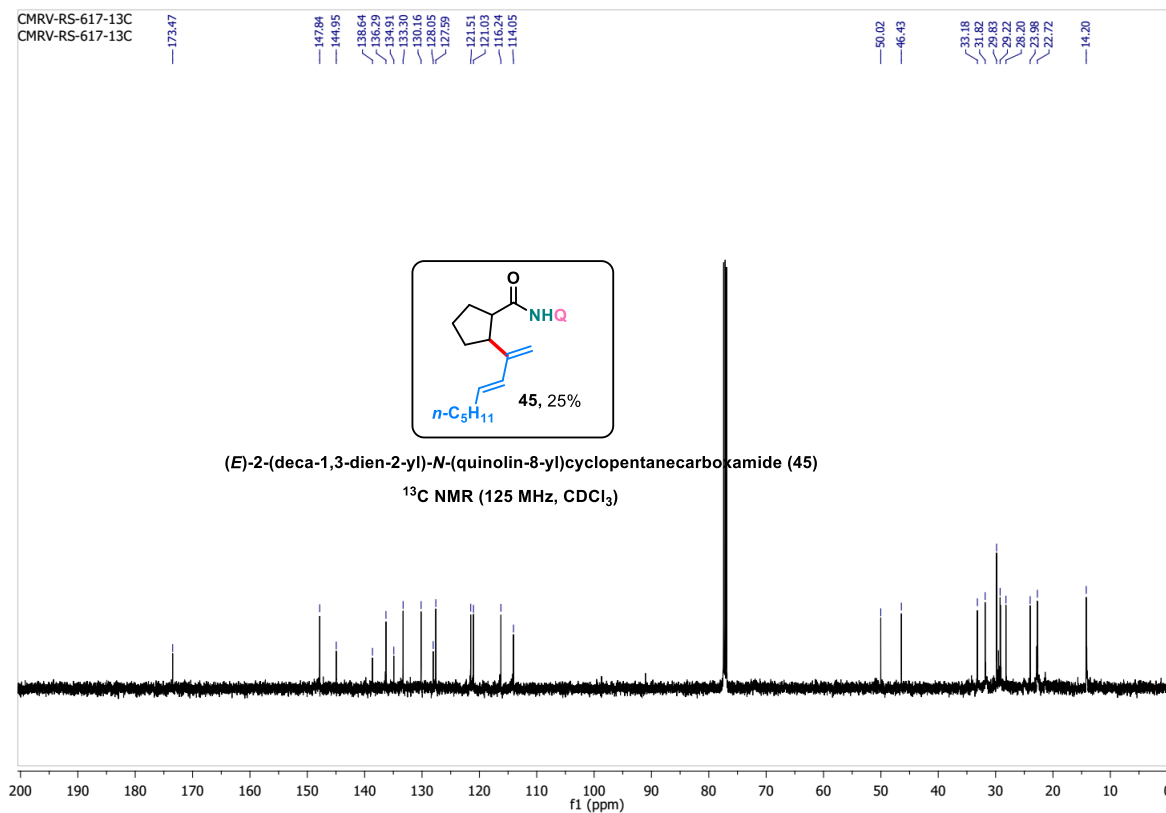

cmrv-an-2-125-1h  
cmrv-an-2-125-1h

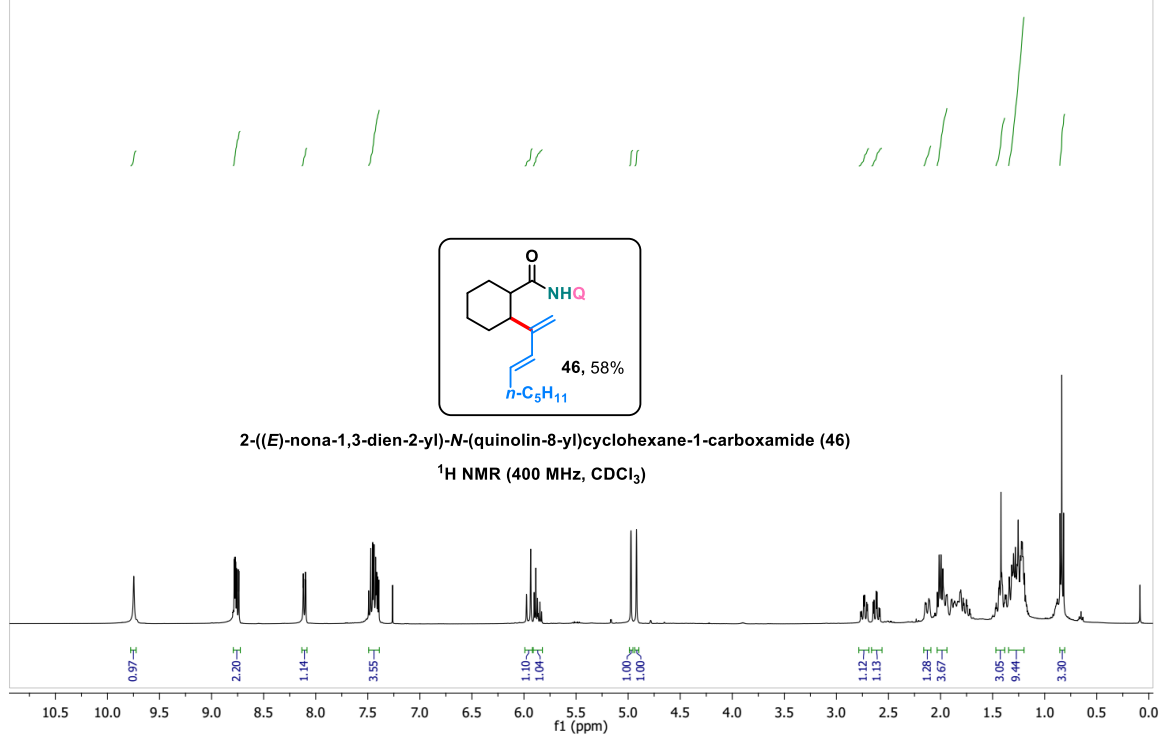

cmrv-an-2-125-13c  
cmrv-an-2-125-13c

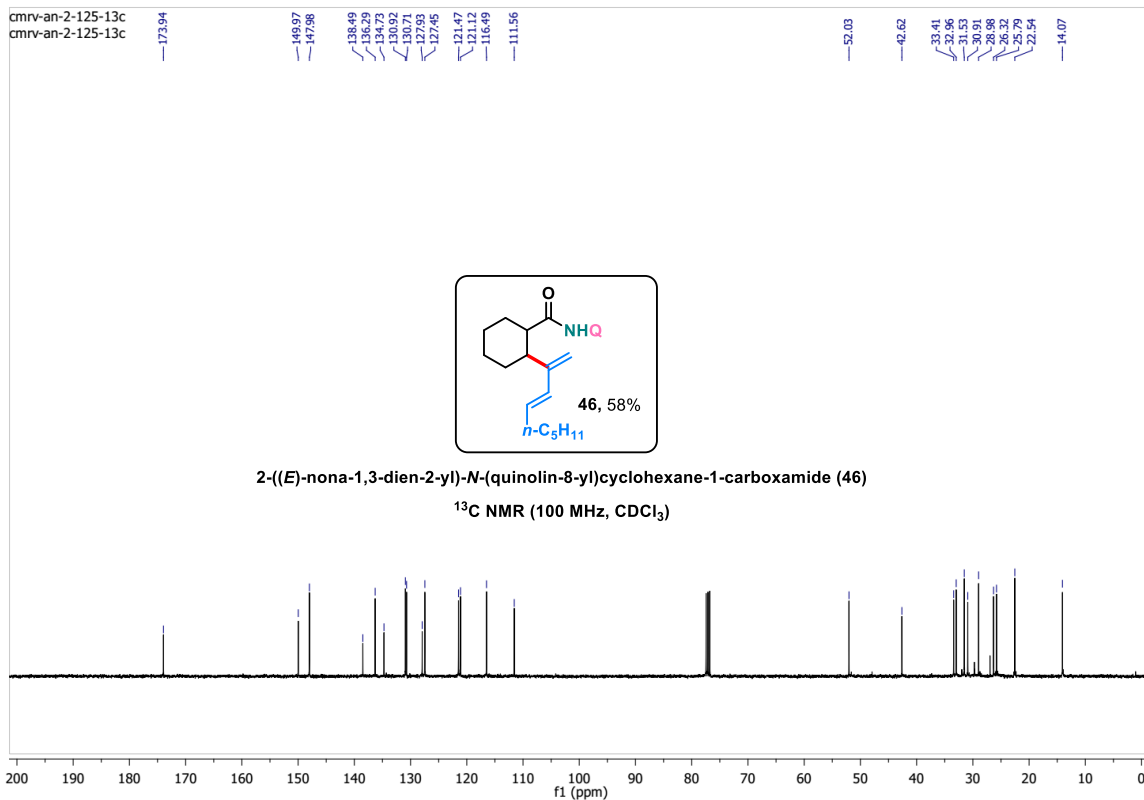

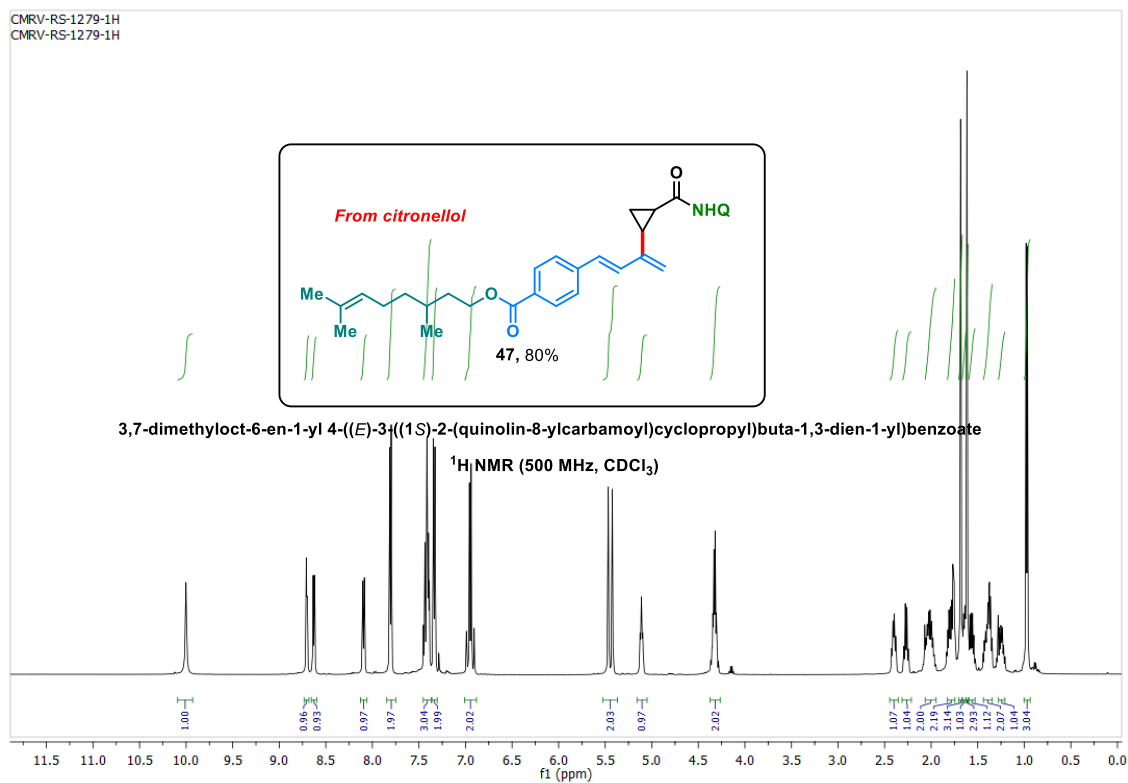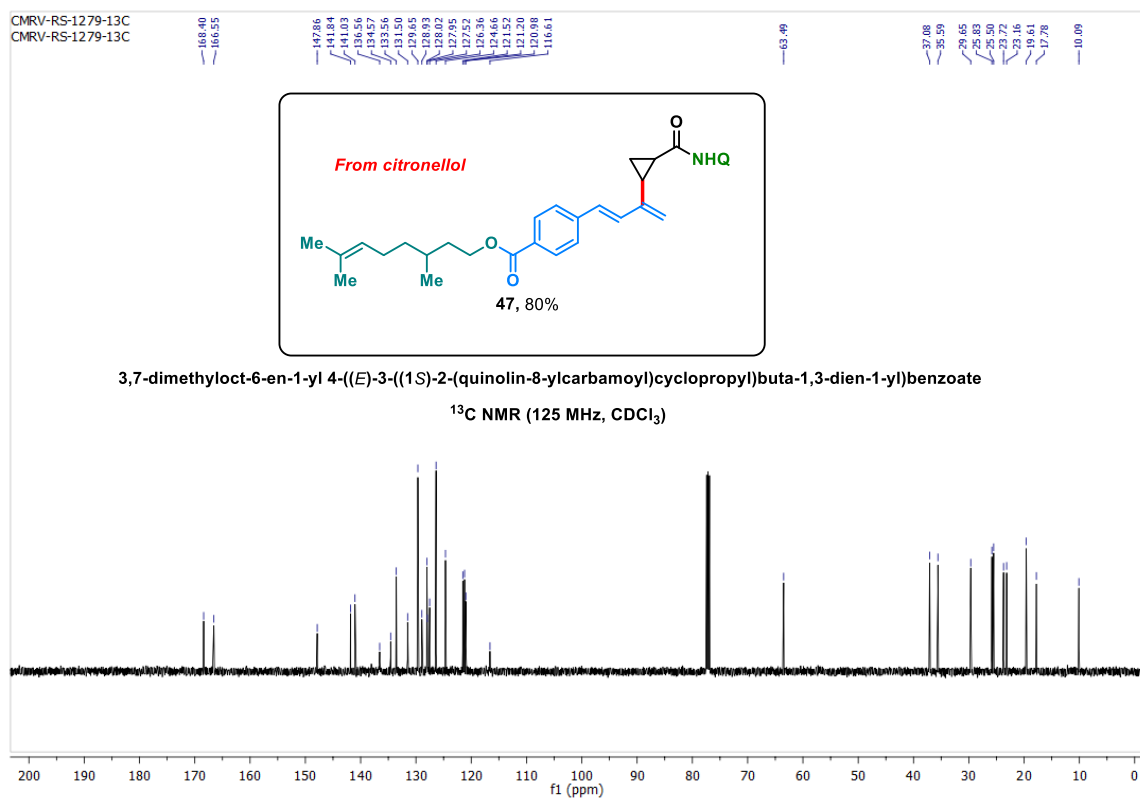

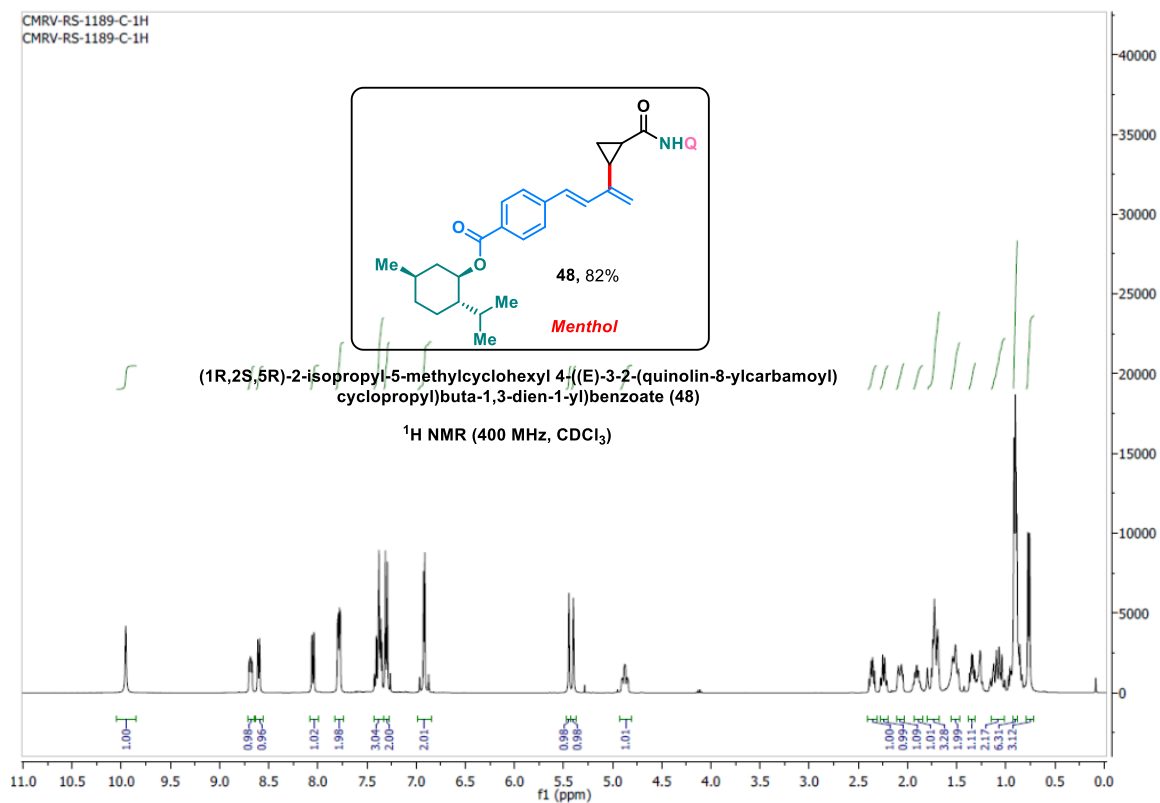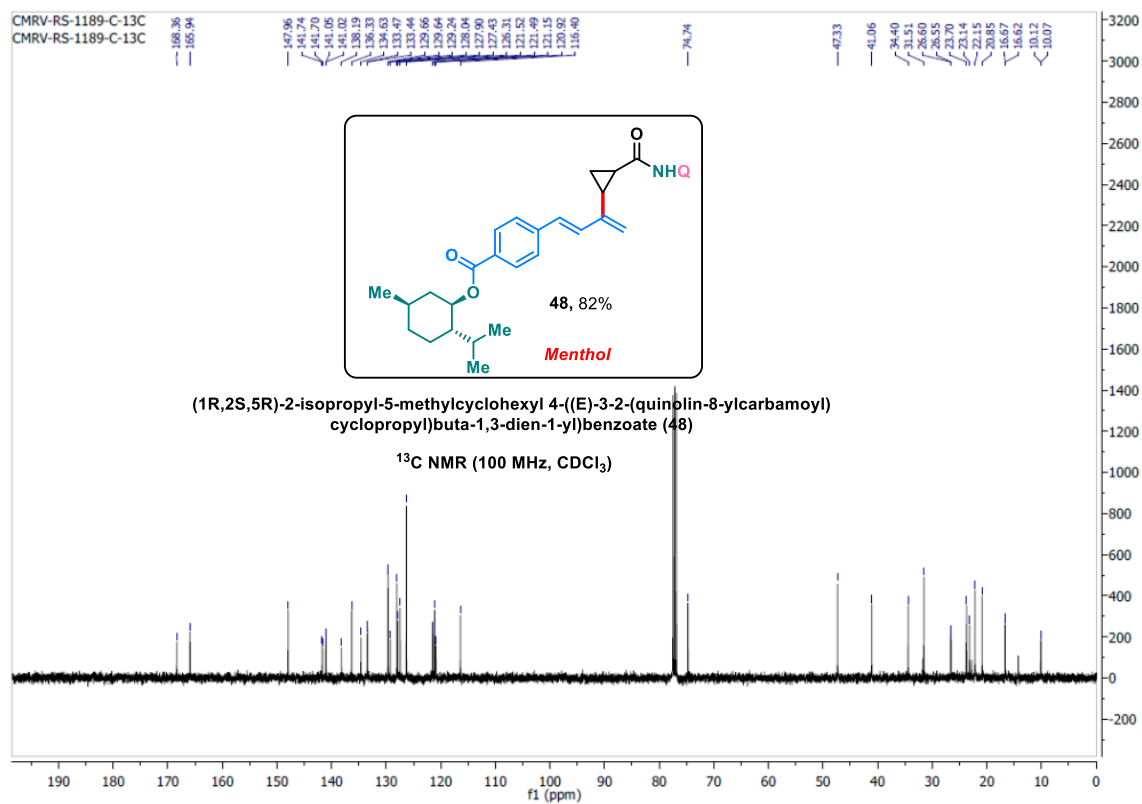

CMRV-RS-1255-1H  
CMRV-RS-1255-1H

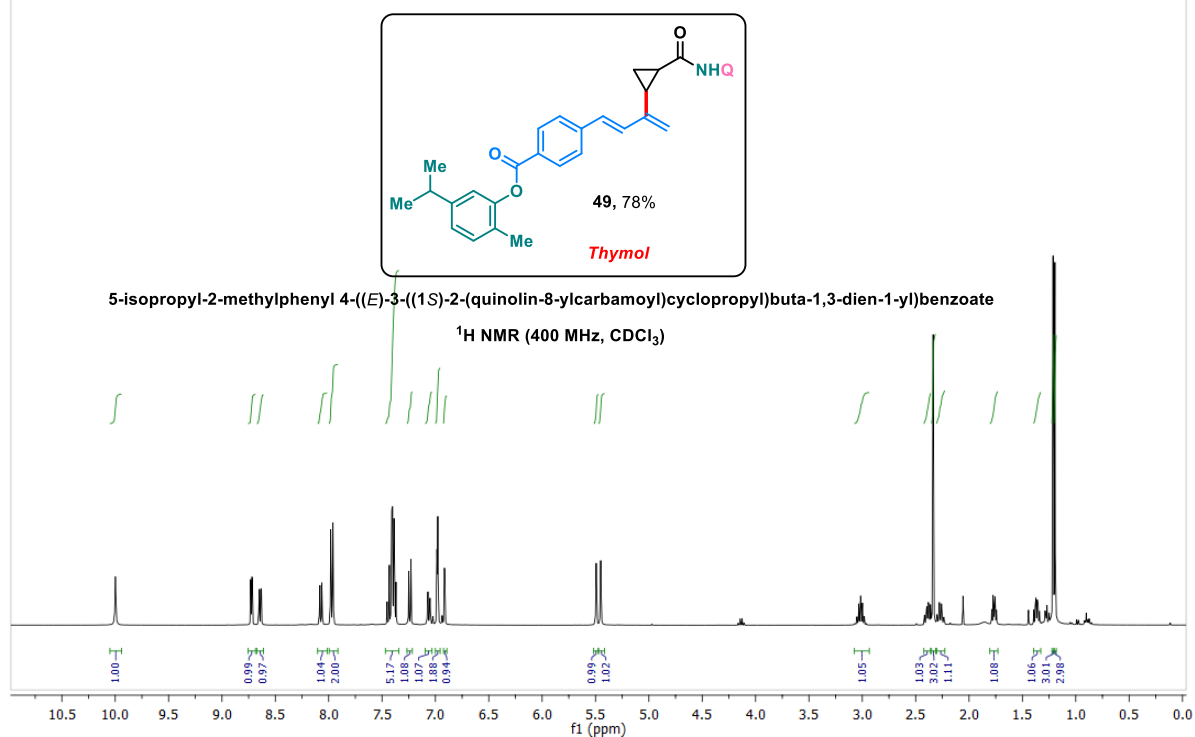

CMRV-RS-1255-13C  
CMRV-RS-1255-13C

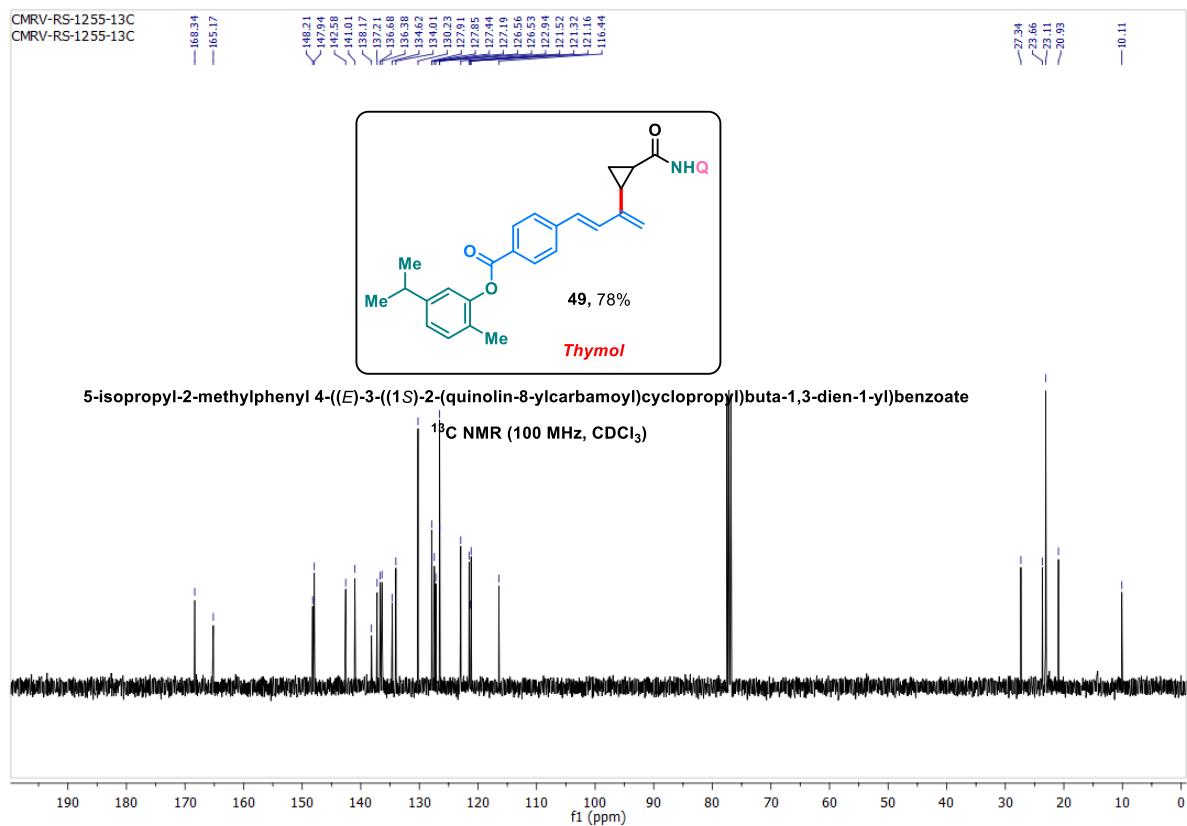

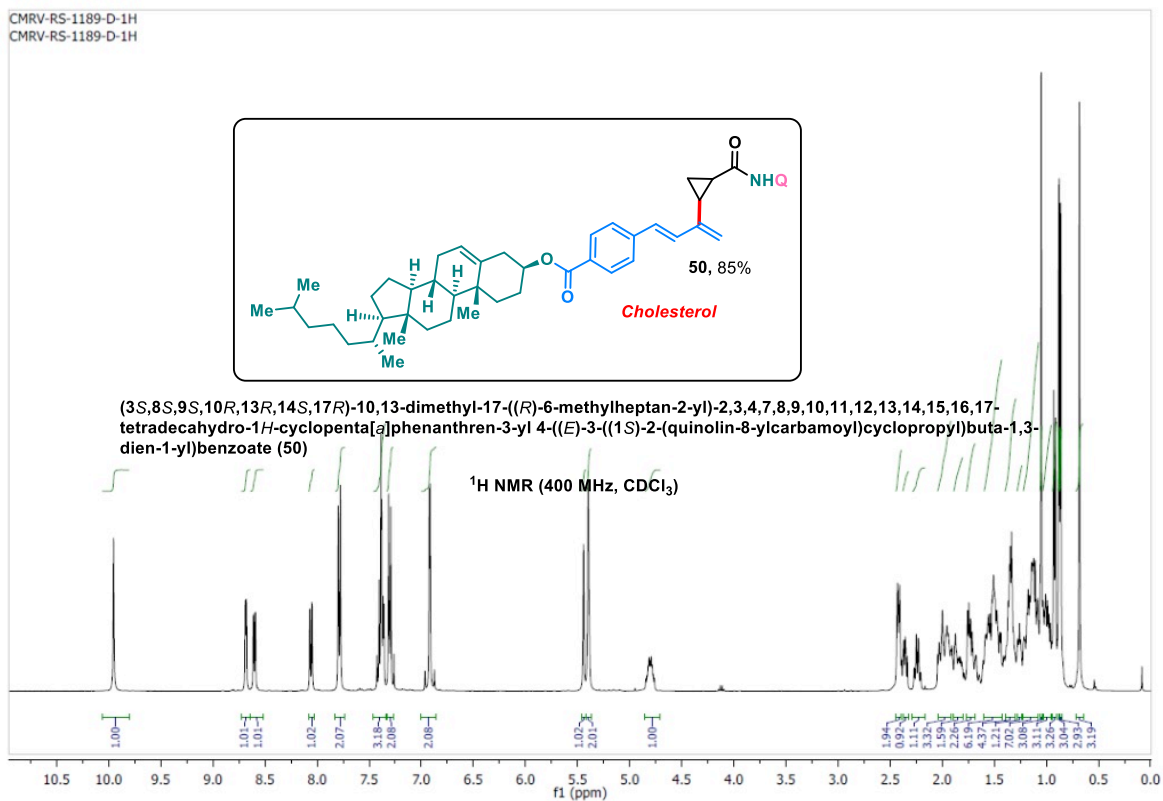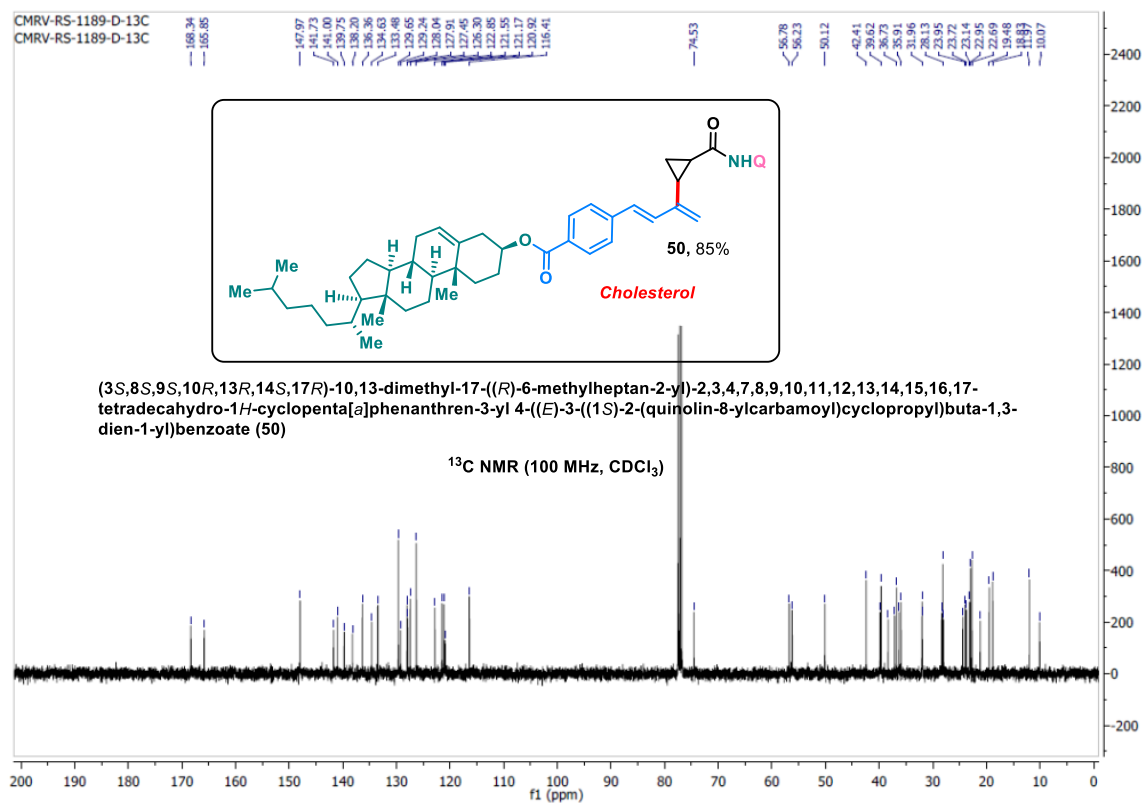

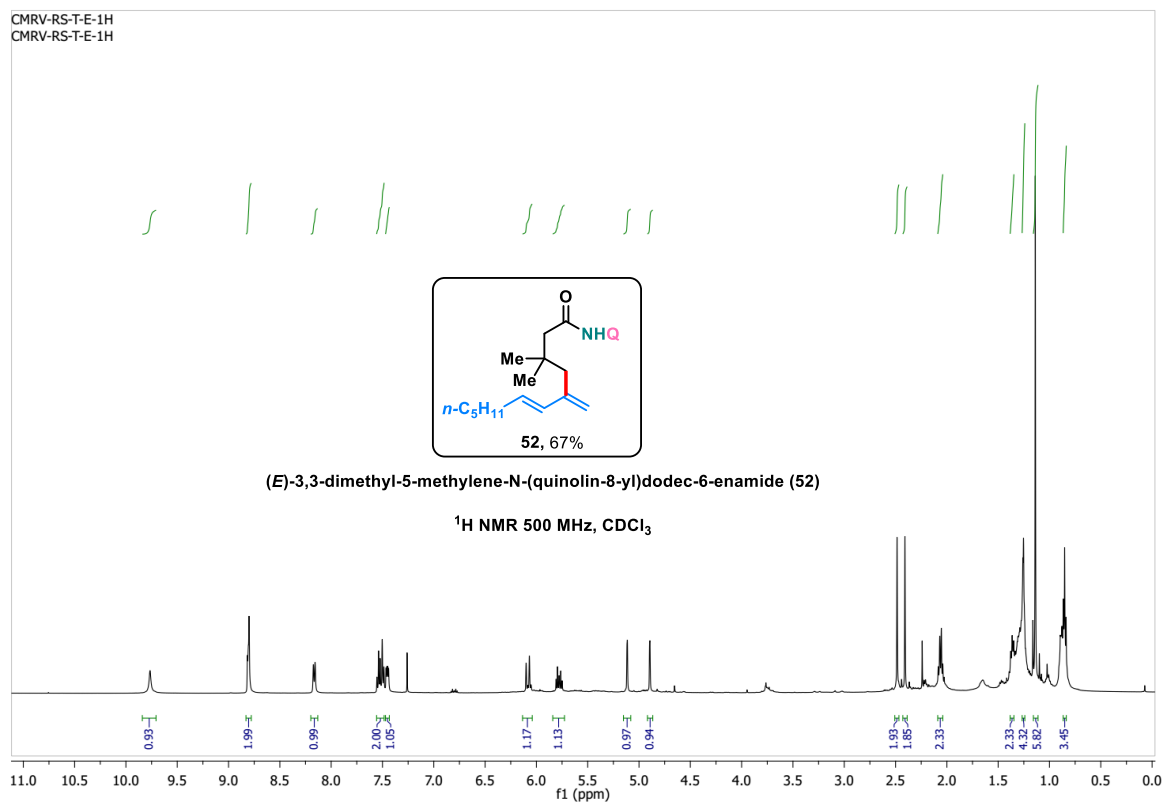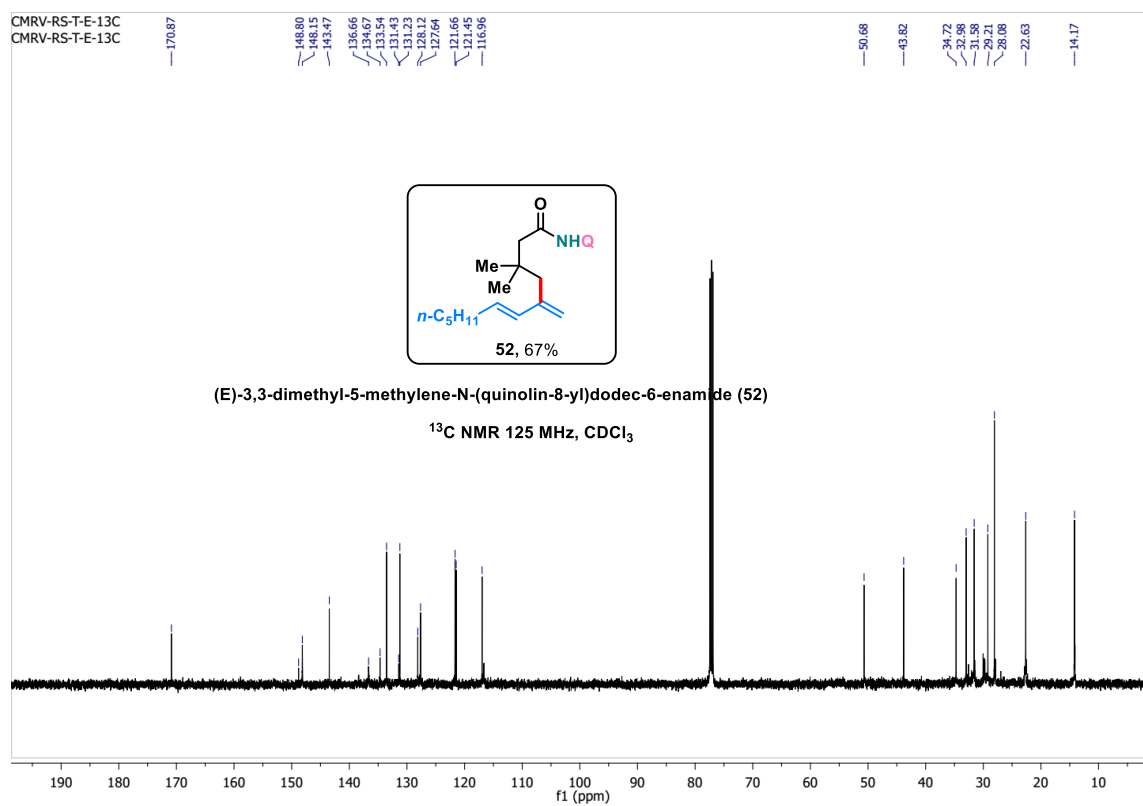

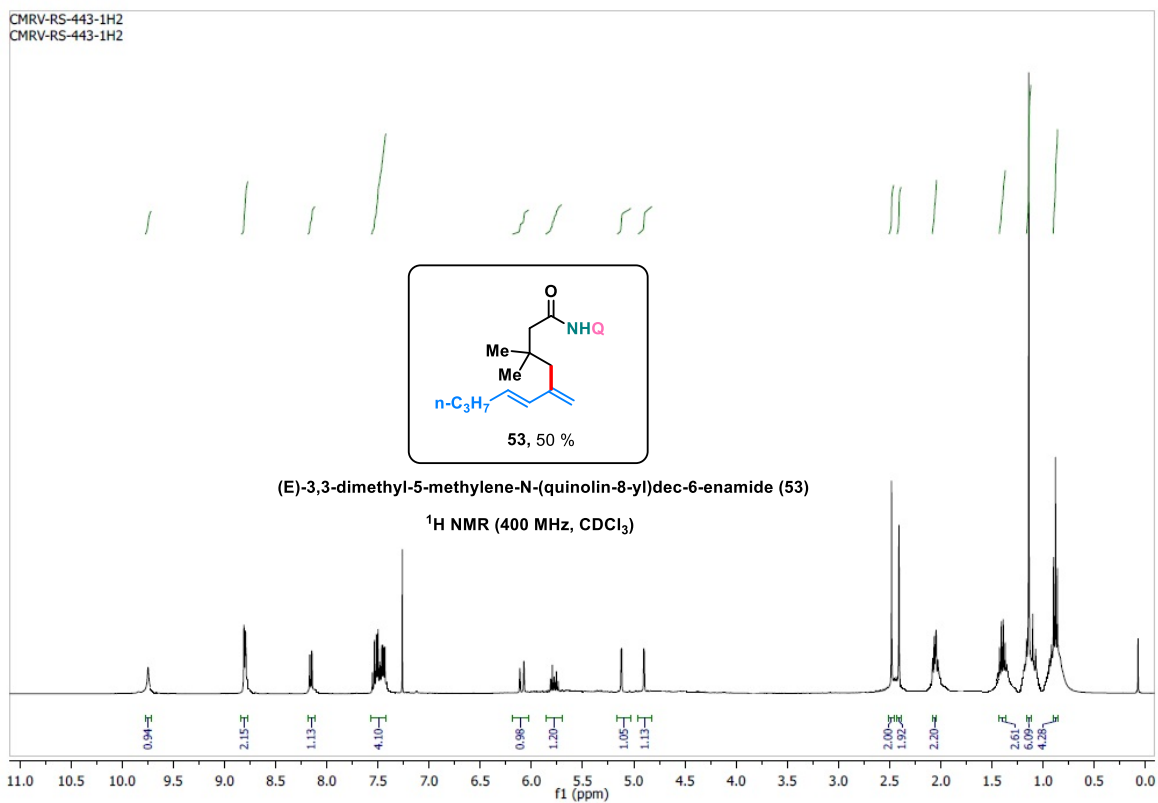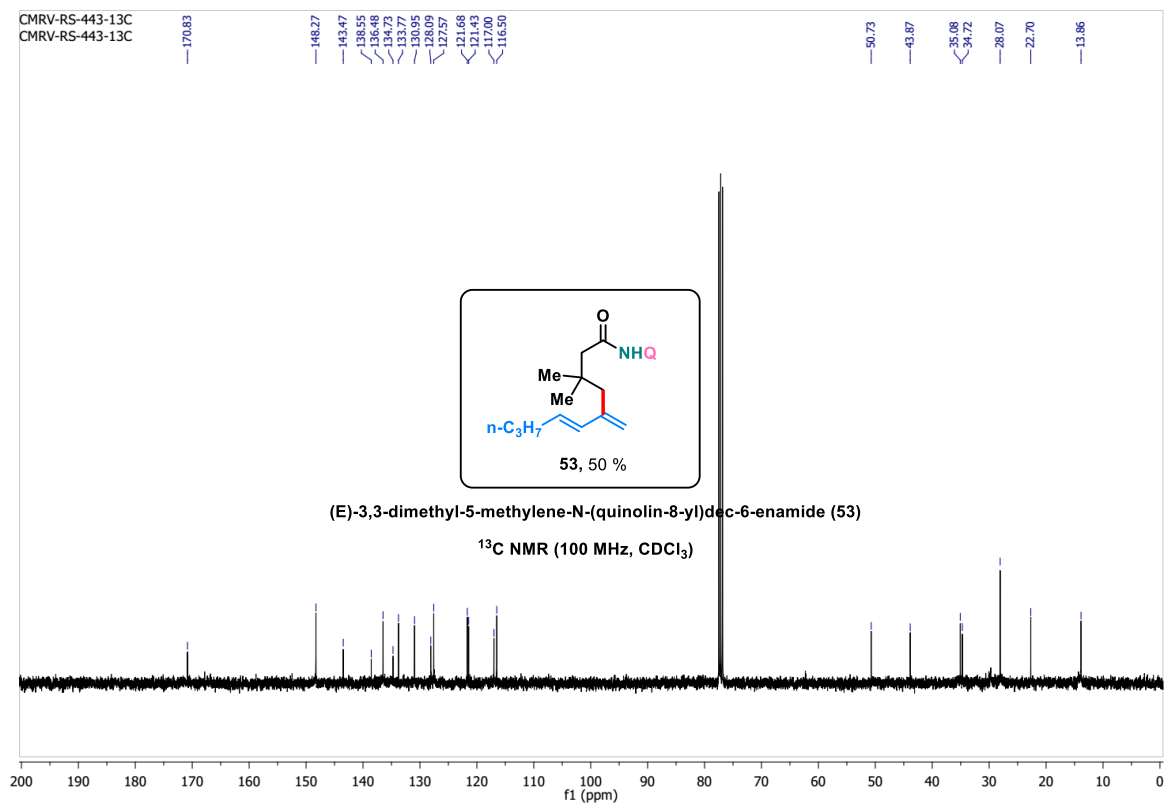



CMRV-RS-440-1HA  
CMRV-RS-440-1H

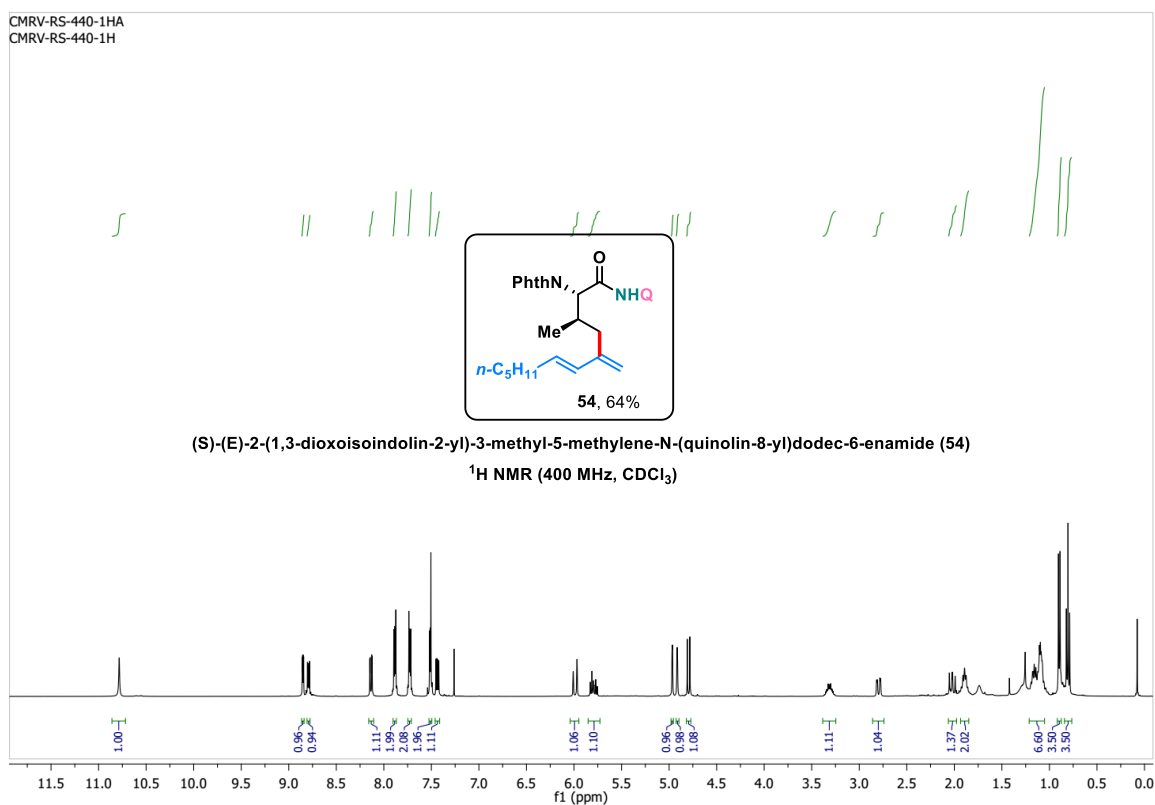

CMRV-RS-440-13C  
CMRV-RS-440-13C

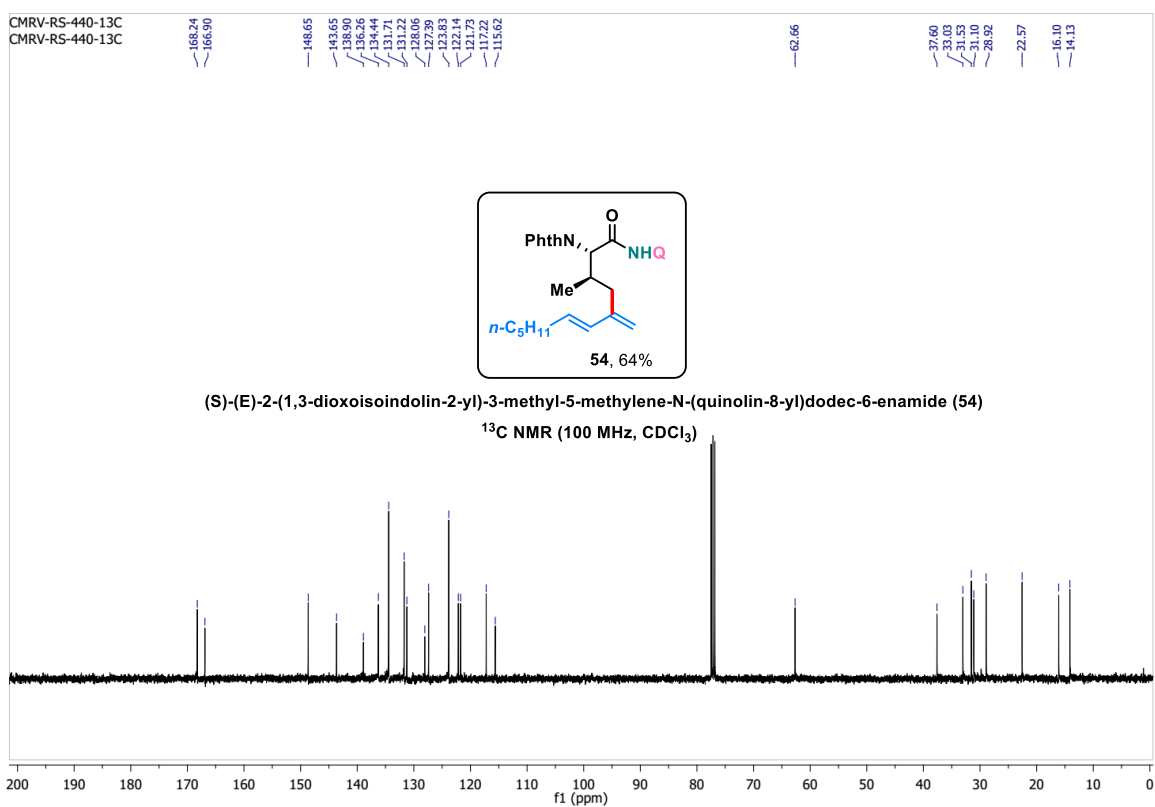

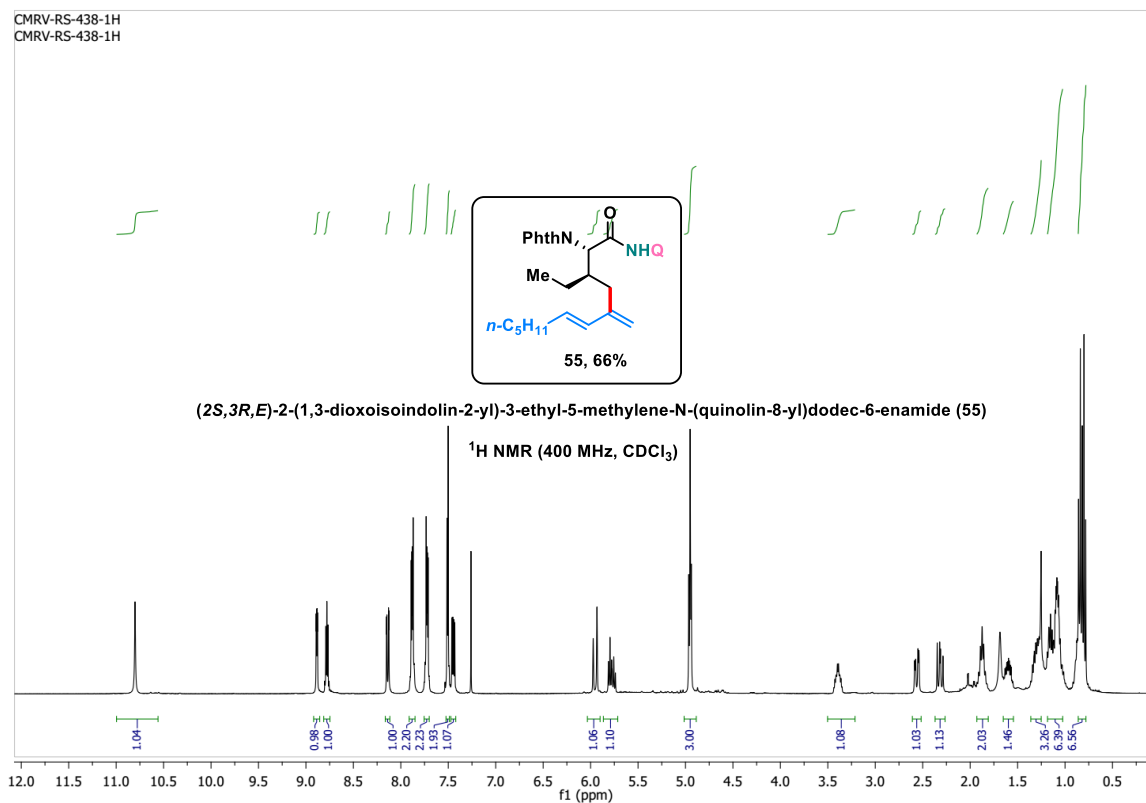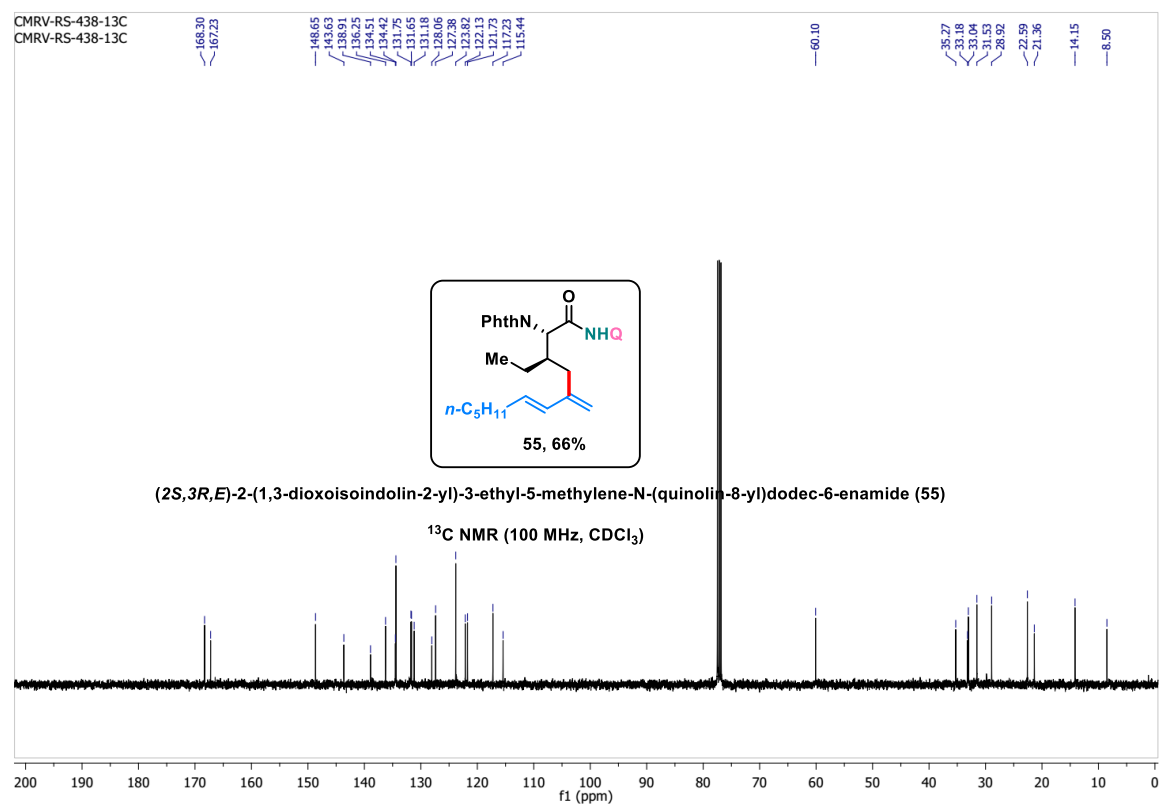

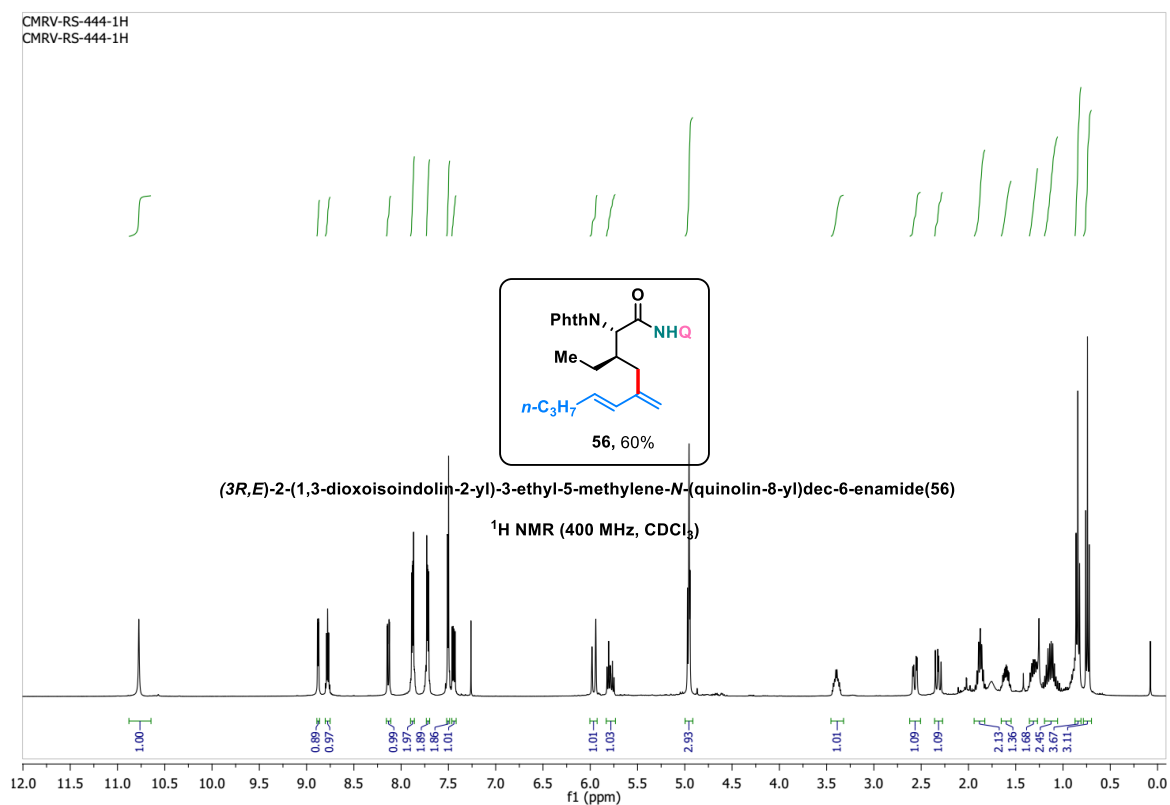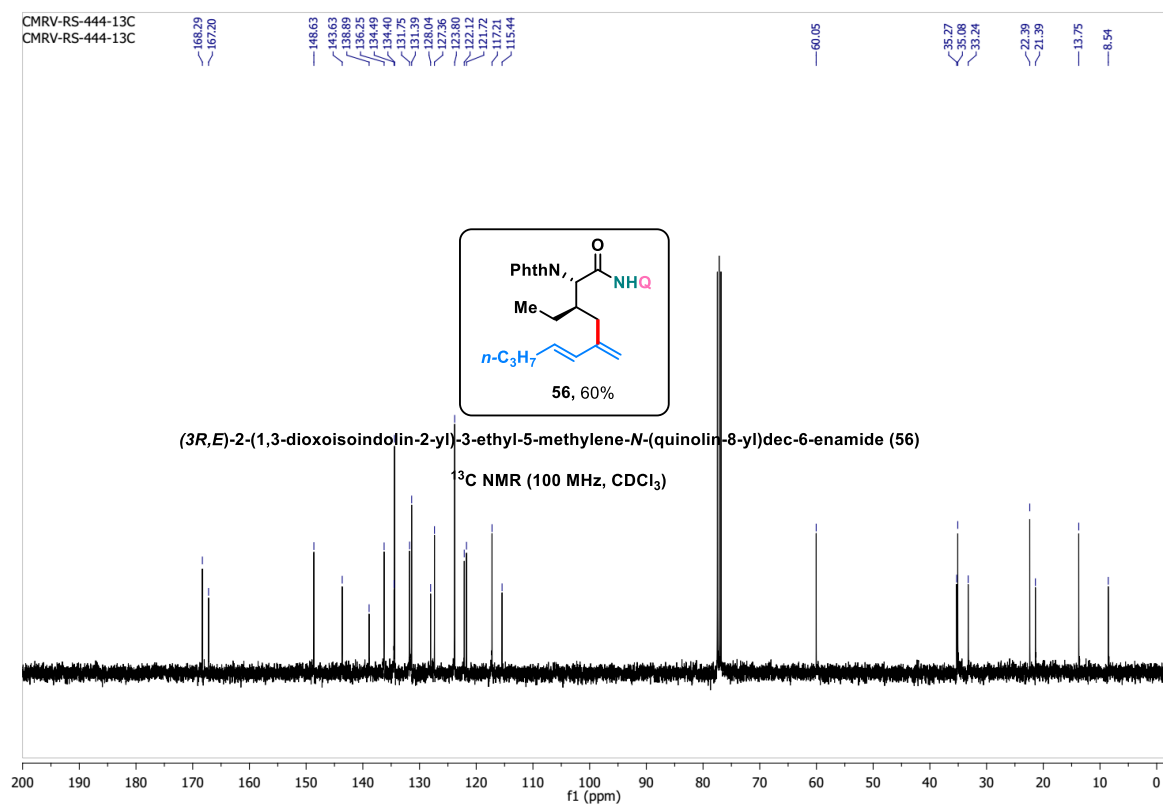

CMRV-RS-452-1H  
CMRV-RS-452-1H

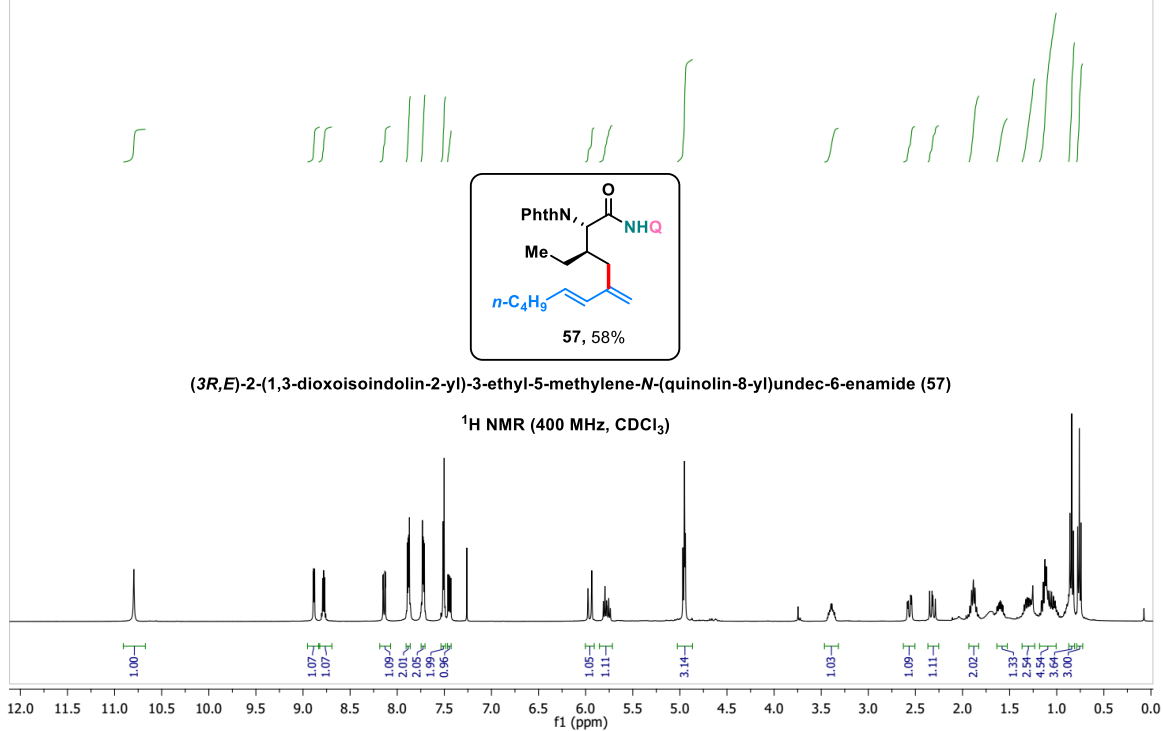

CMRV-RS-452-13C  
CMRV-RS-452-13C

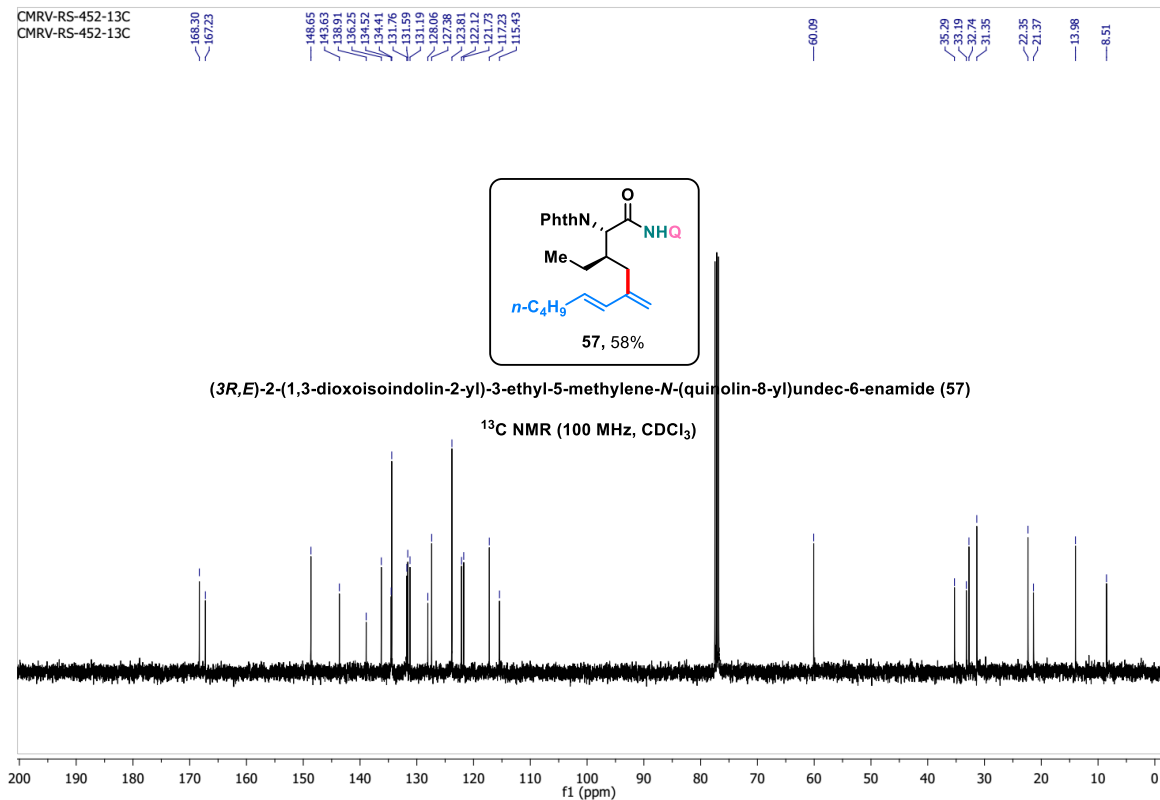

CMRV-RS-450-1H  
CMRV-RS-450-1H

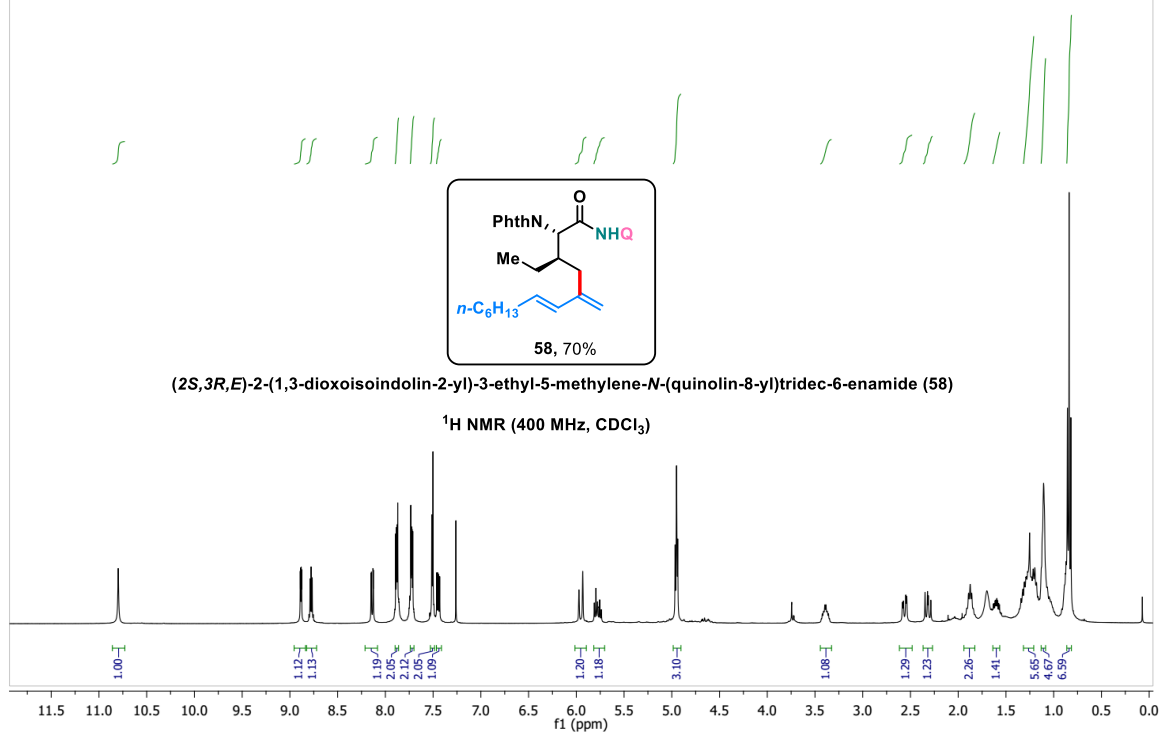

CMRV-RS-450-1H, CDCl<sub>3</sub> δ 178.7, 167.10, 148.52, 143.51, 138.20, 136.42, 134.38, 134.29, 131.63, 127.25, 125.69, 122.00, 121.60, 119.15, 115.30, 109.27, 105.63, 105.32, 29.07, 28.87, 22.56, 21.23, 14.10, 8.37.

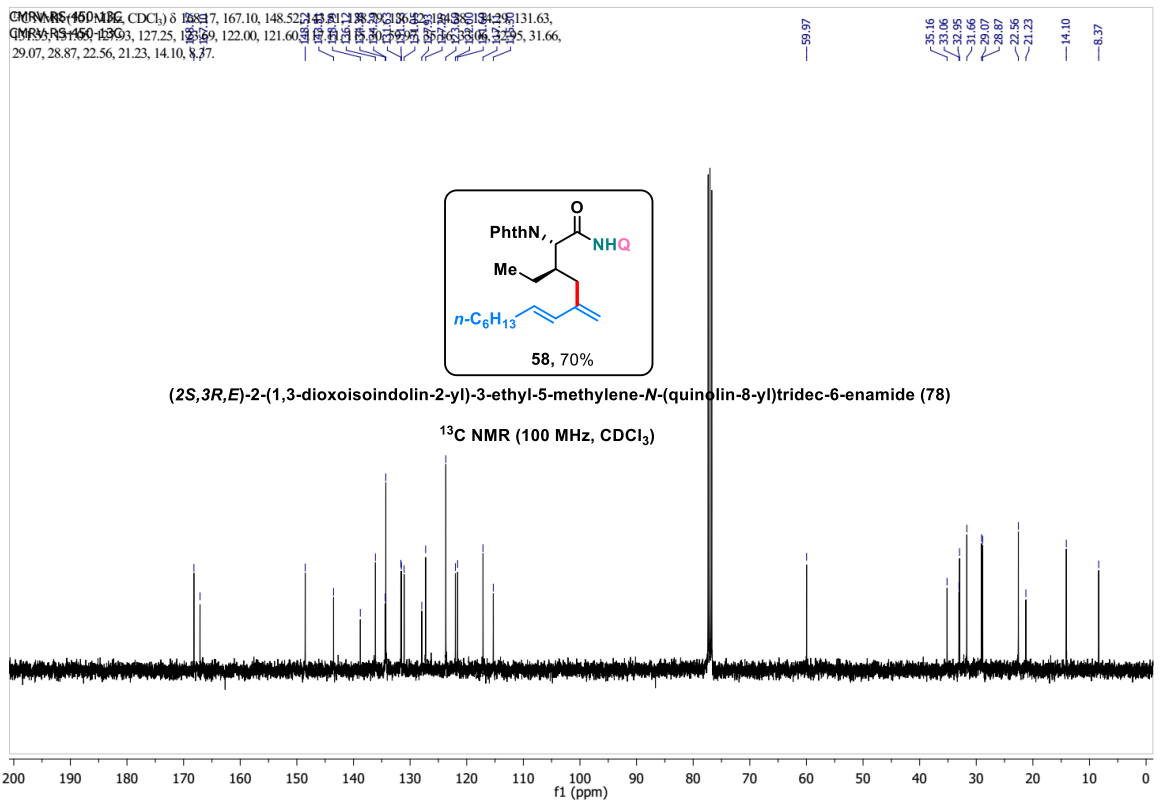

CMRV-RS-451-1H  
CMRV-RS-451-1H

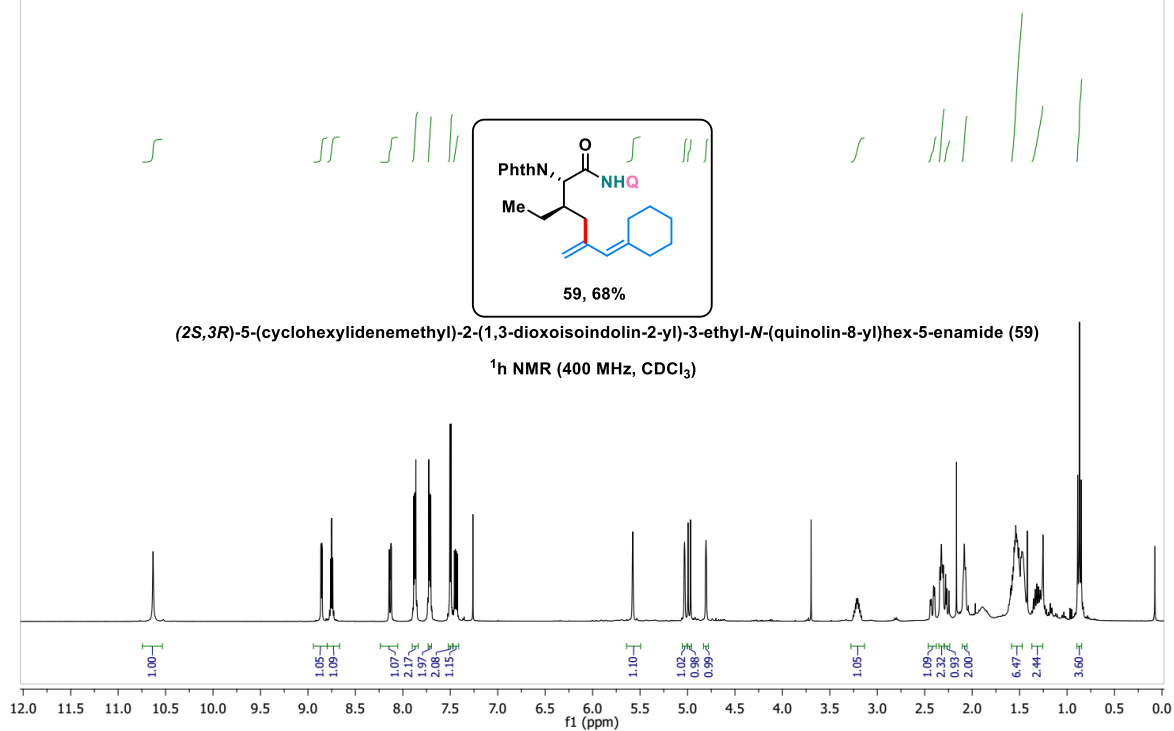

CMRV-RS-451-13C  
CMRV-RS-451-13C

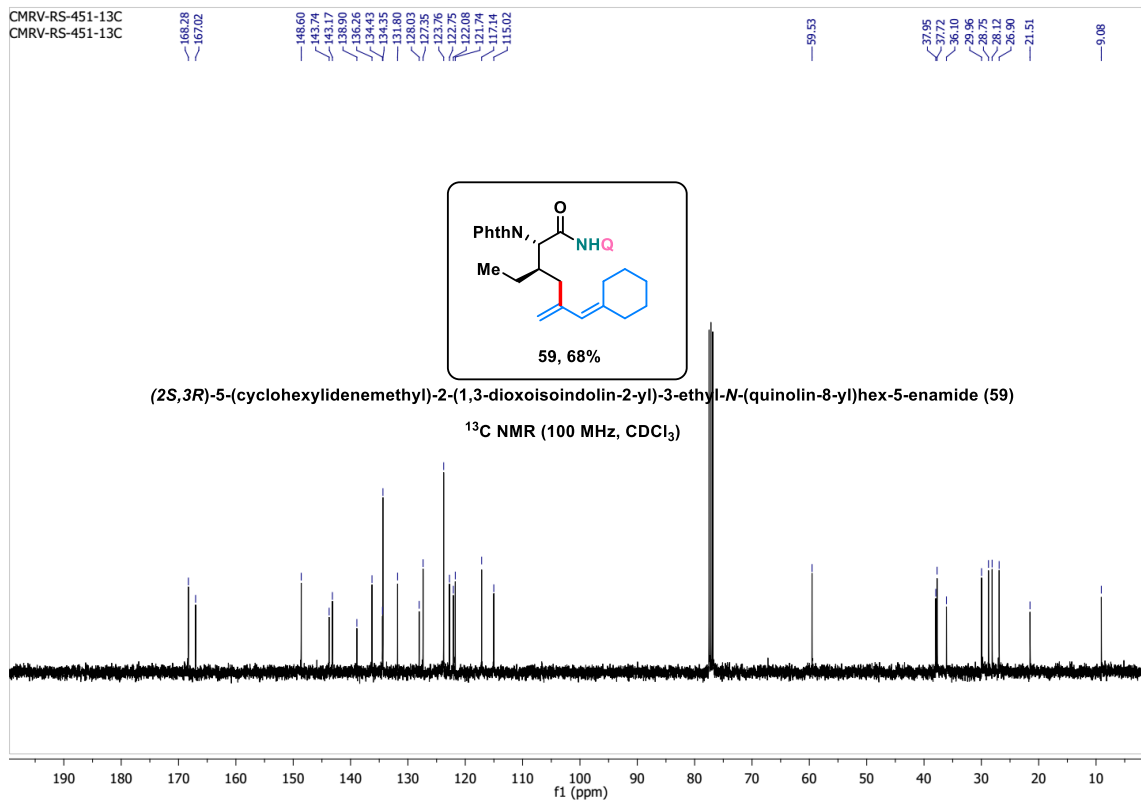

CMRV-RS-463-1H  
CMRV-RS-463-1H

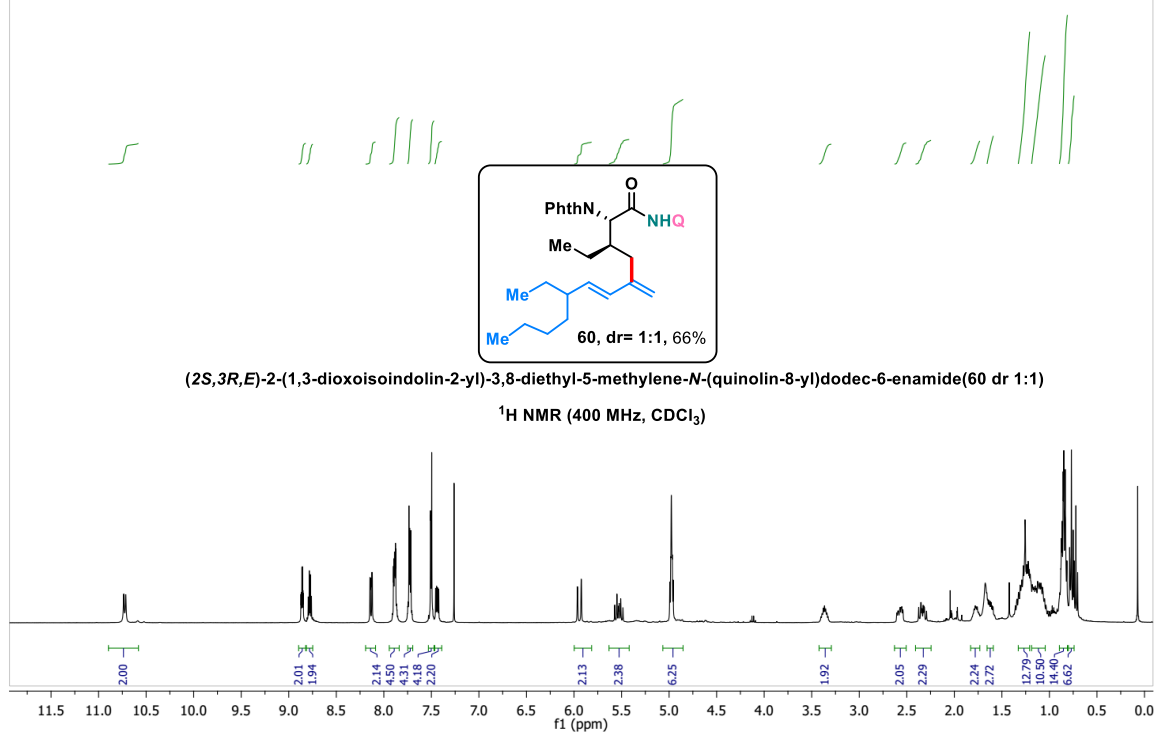

CMRV-RS-463-13  
CMRV-RS-463-13

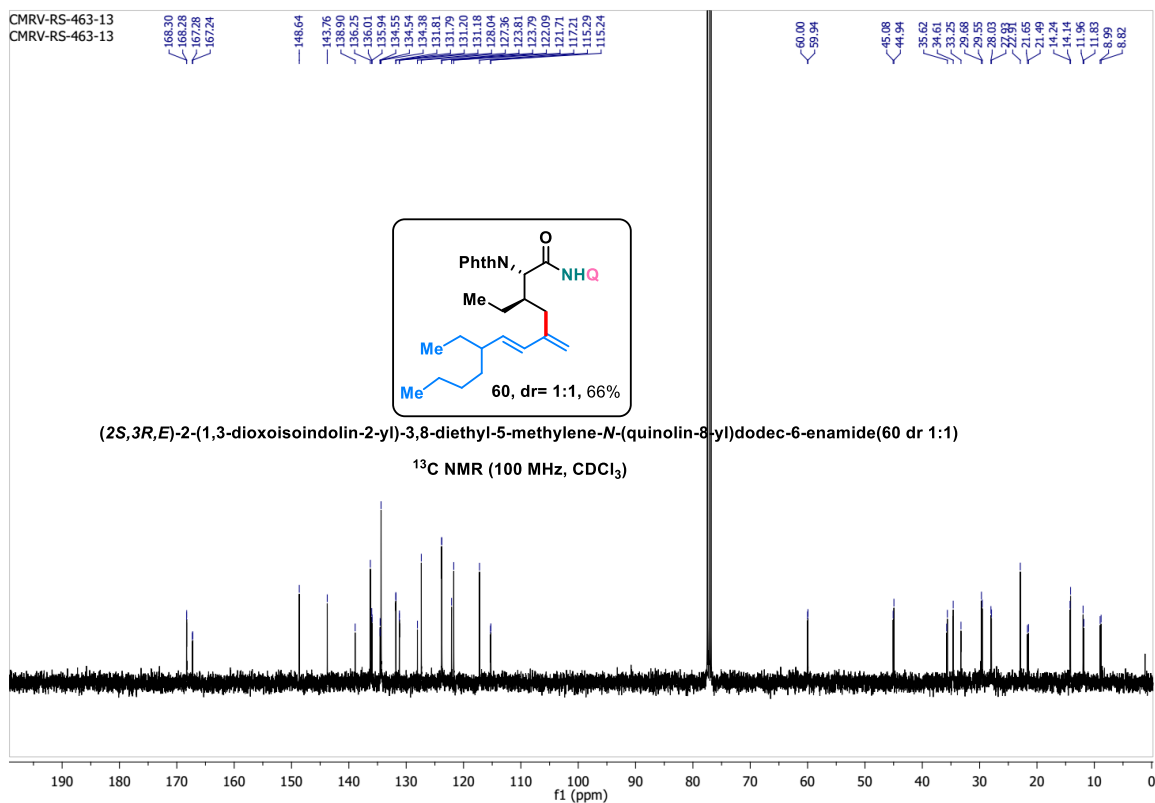

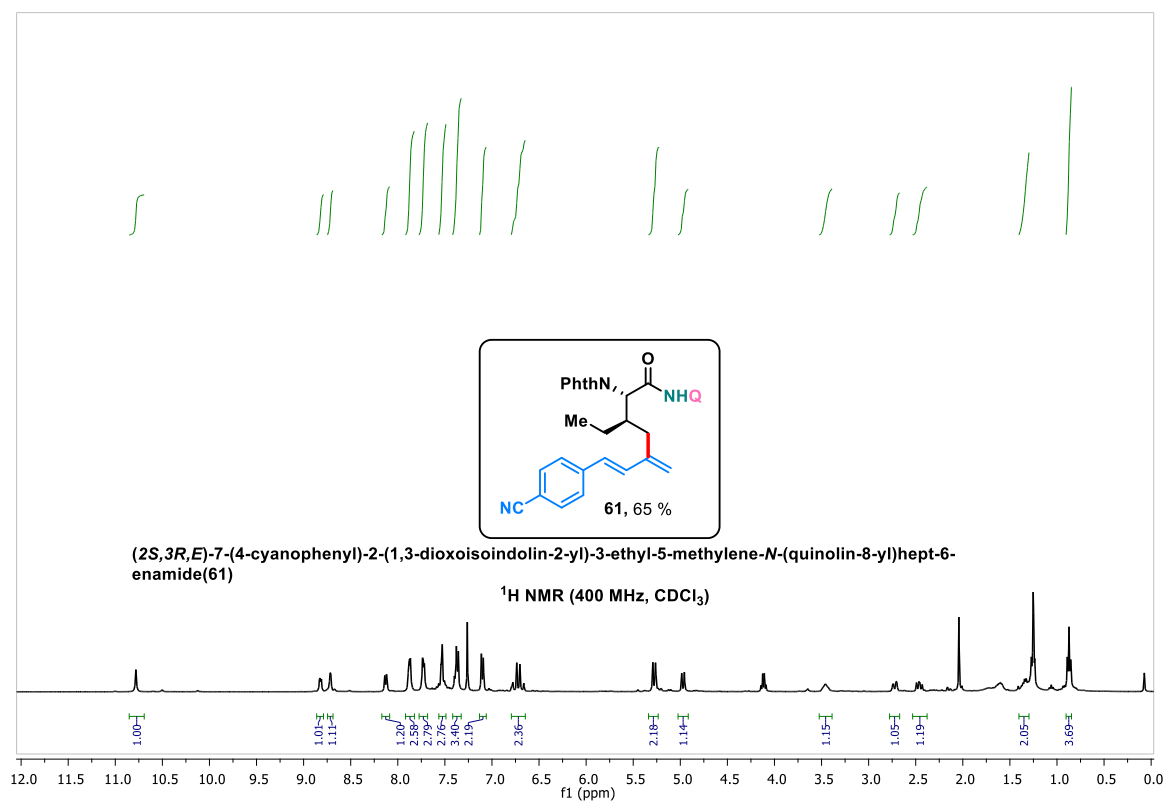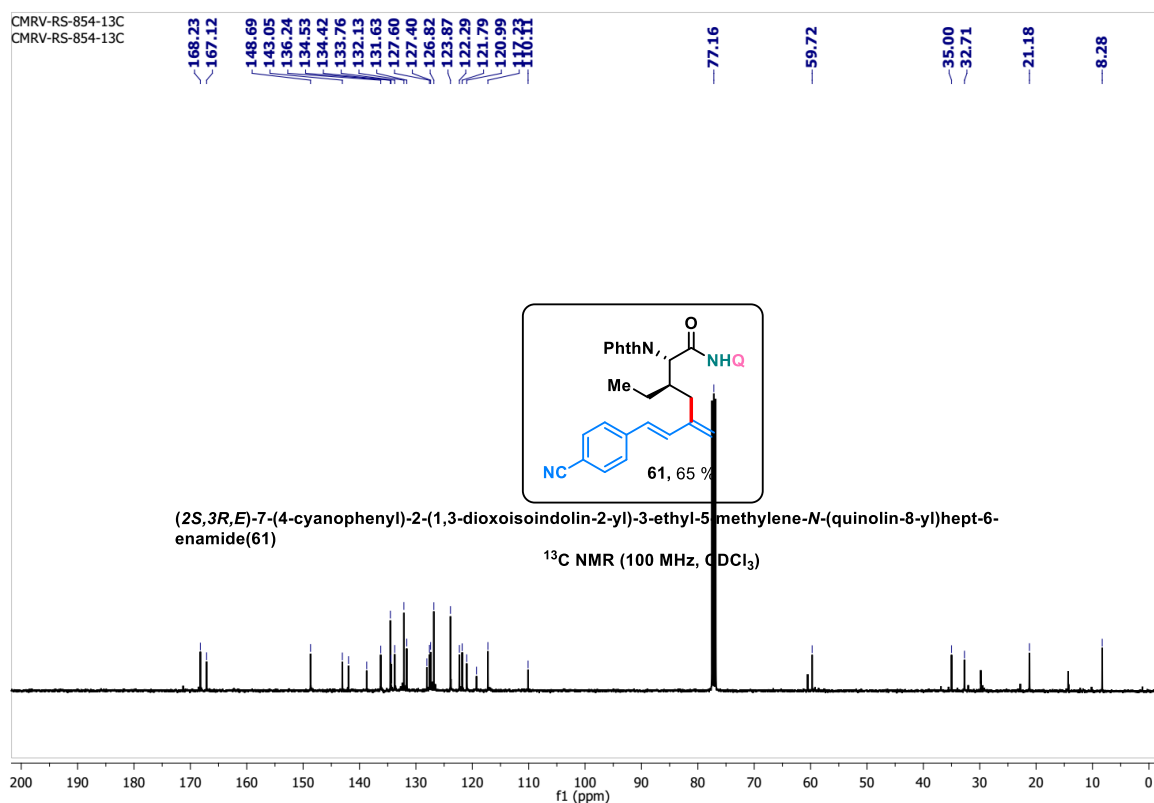



CMRV-RS-888-1H  
CMRV-RS-888-1H

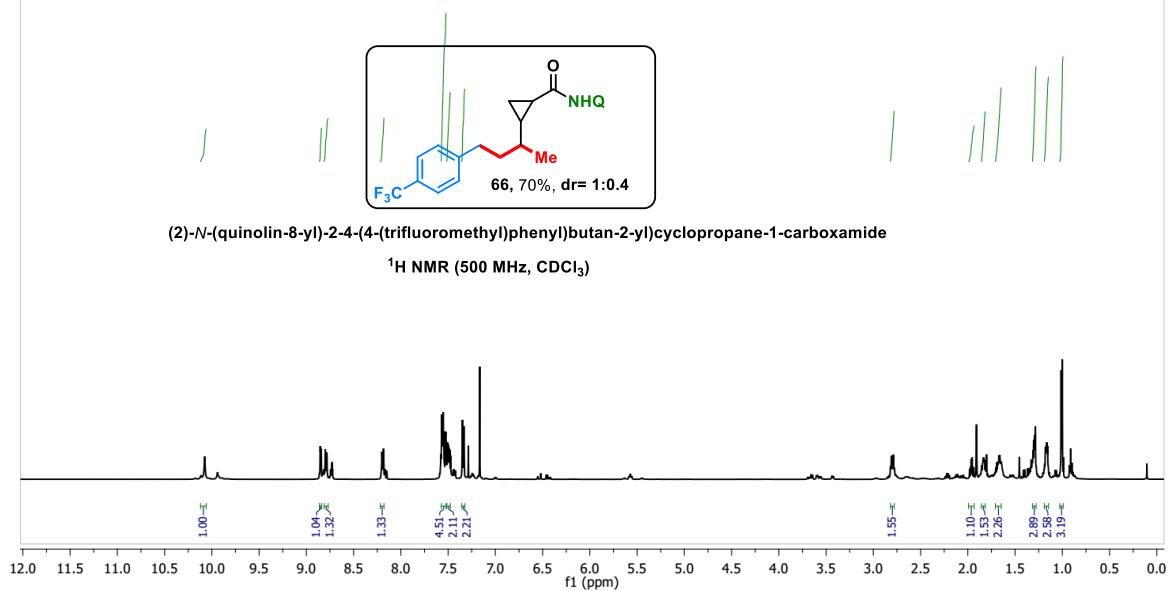

CMRV-RS-888-13C  
CMRV-RS-888-13C

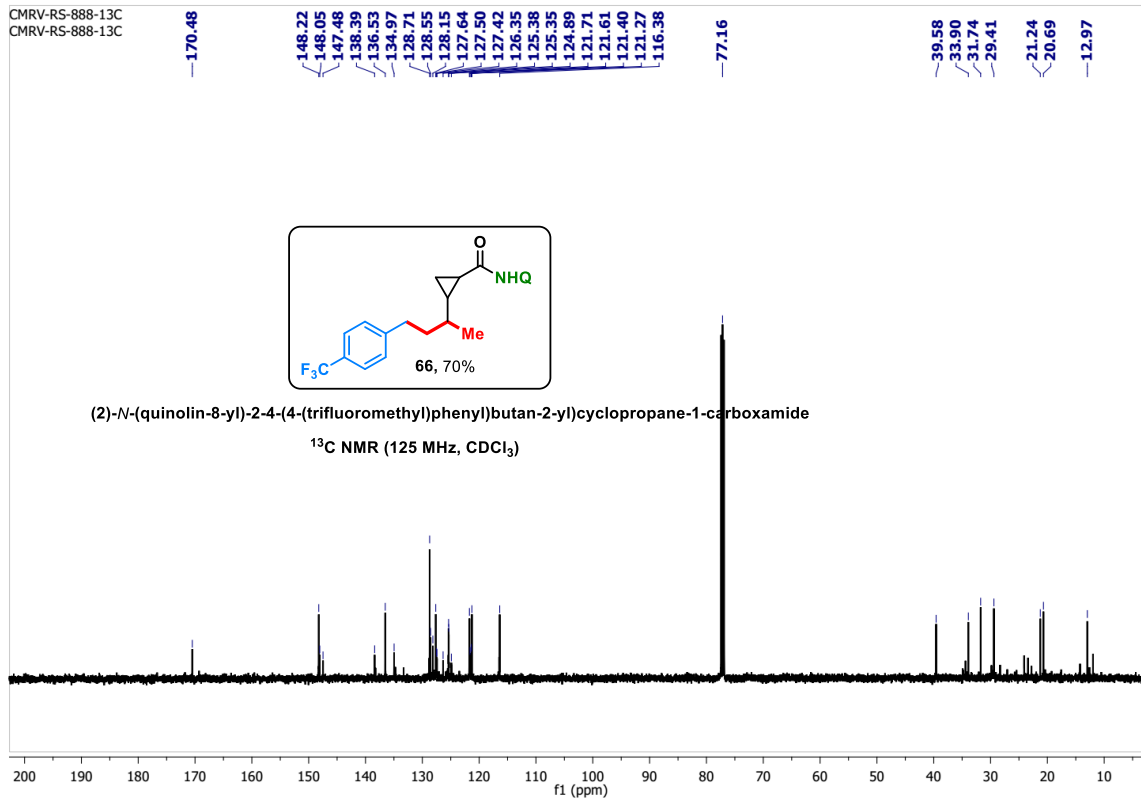

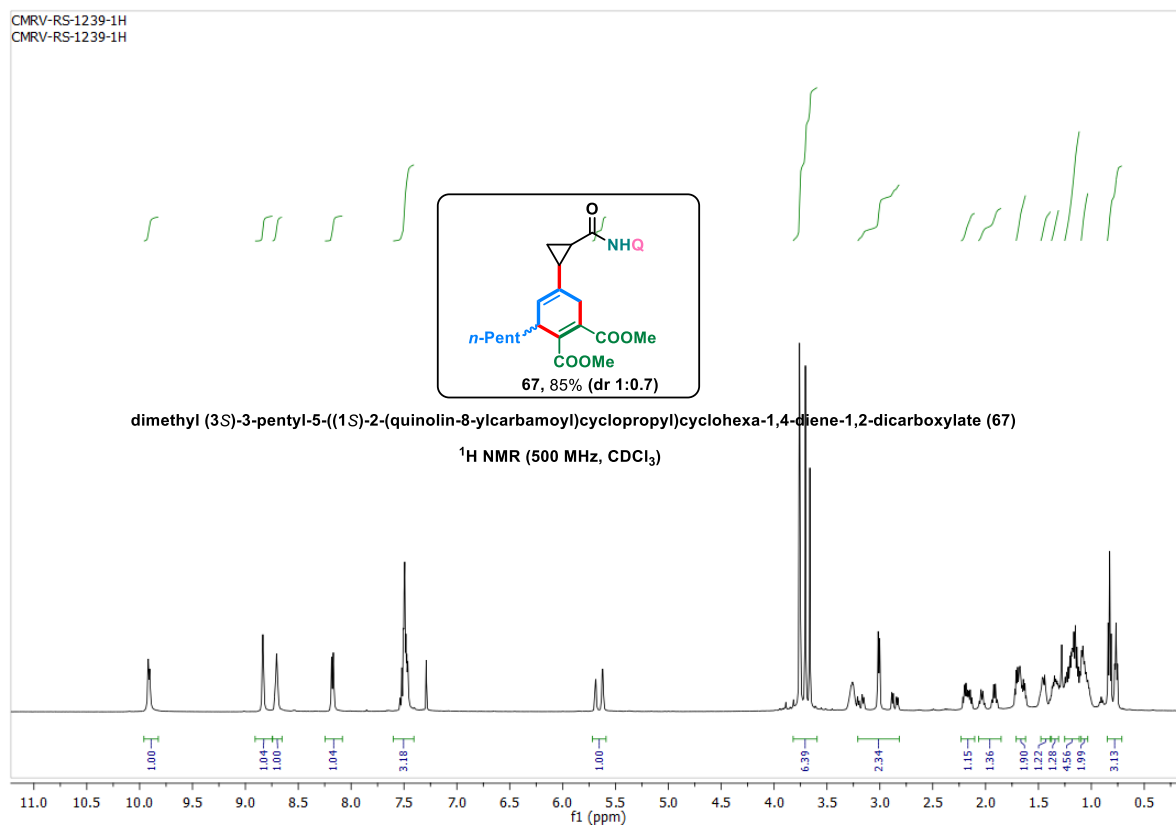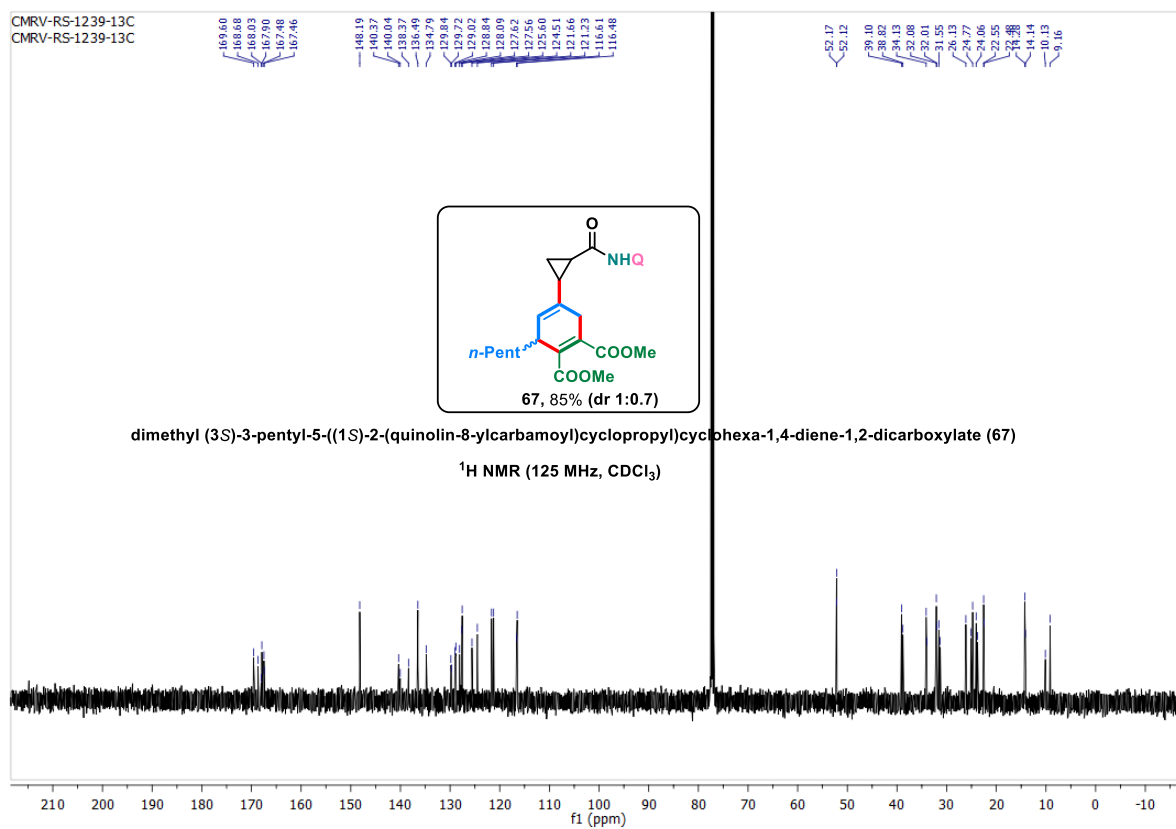

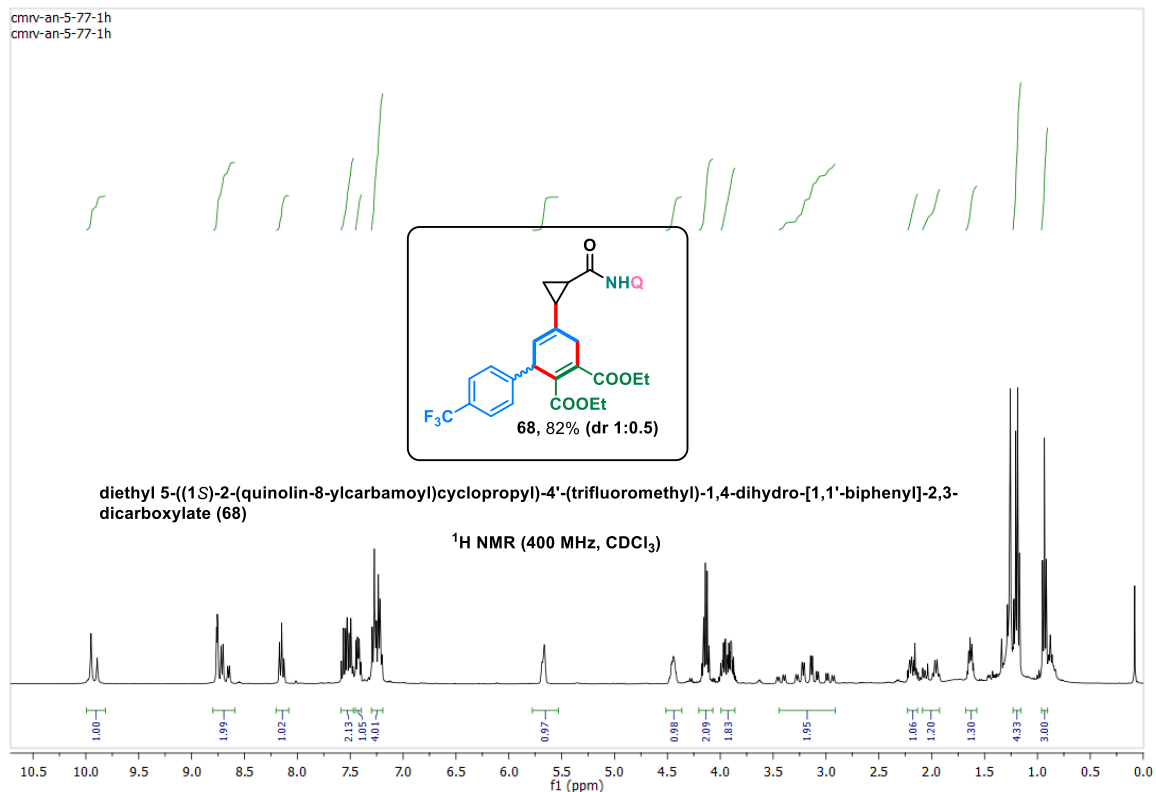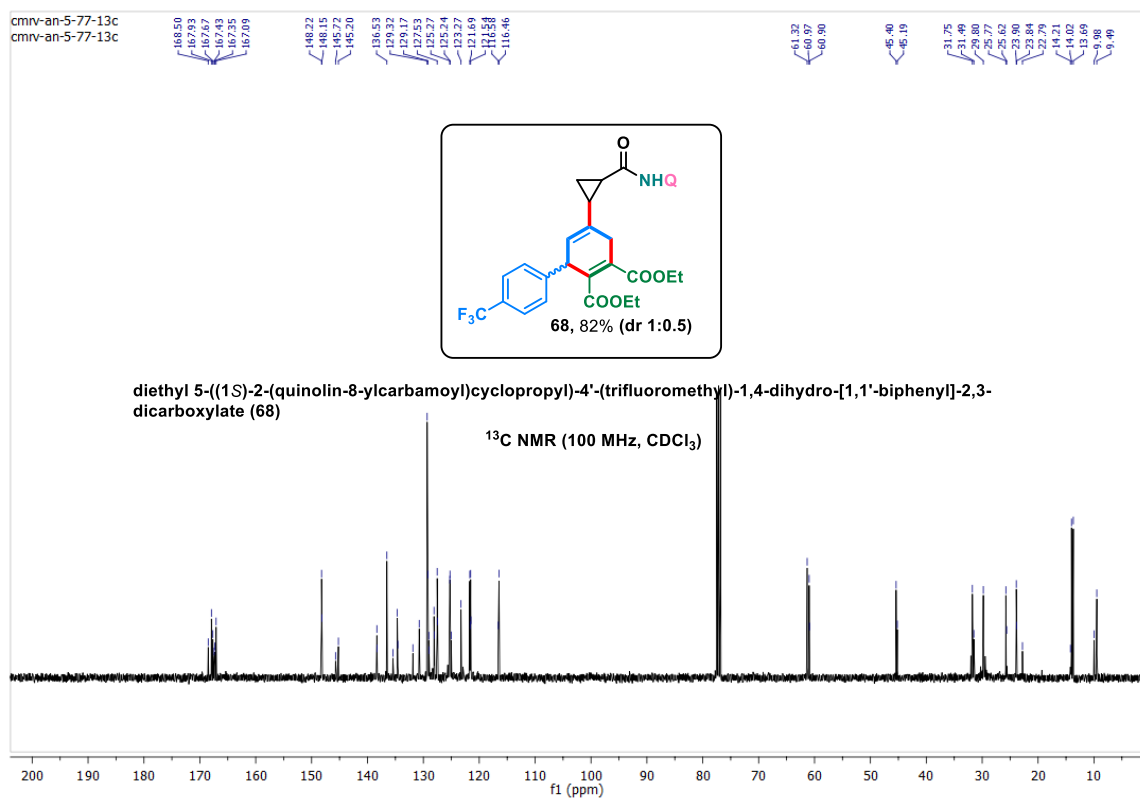

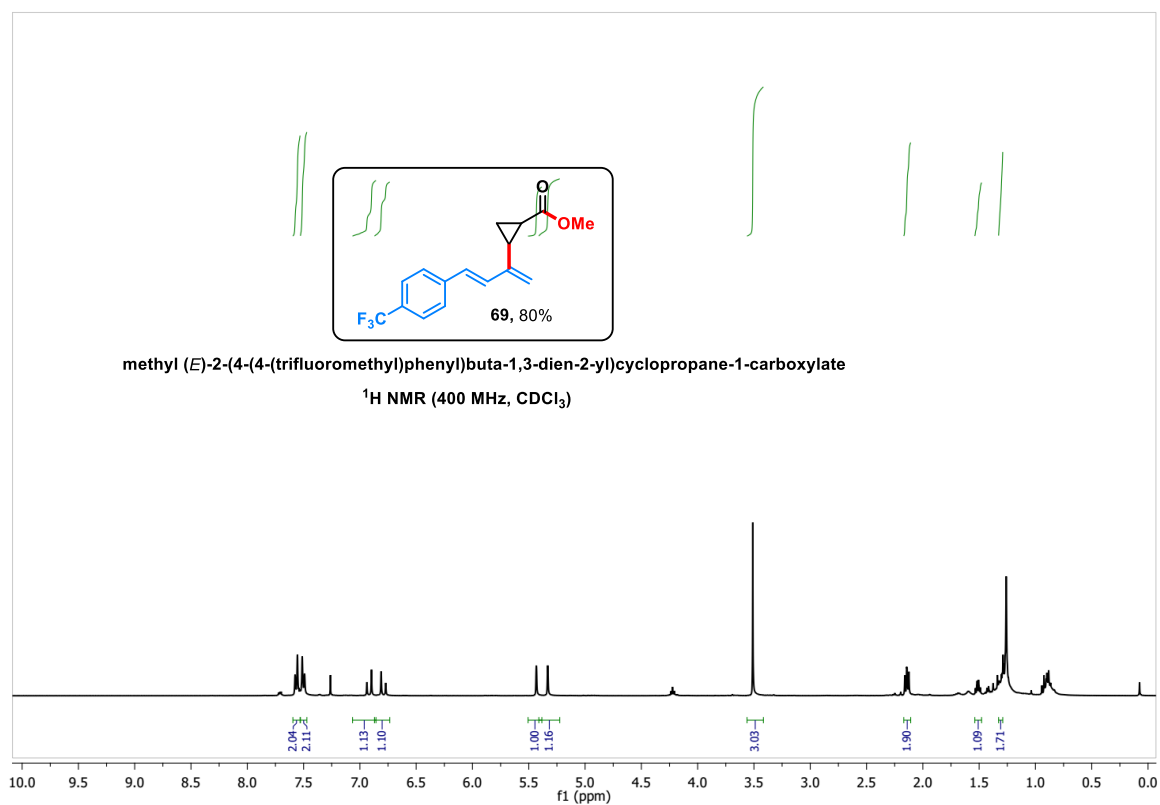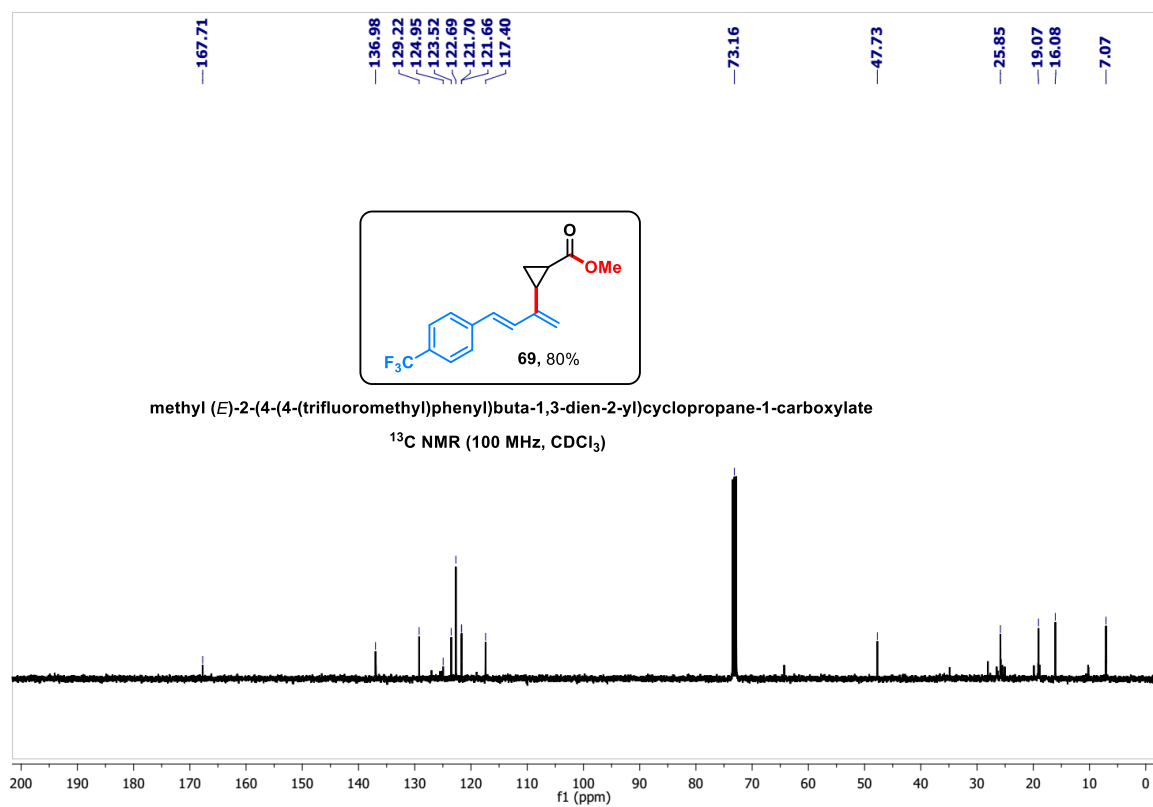

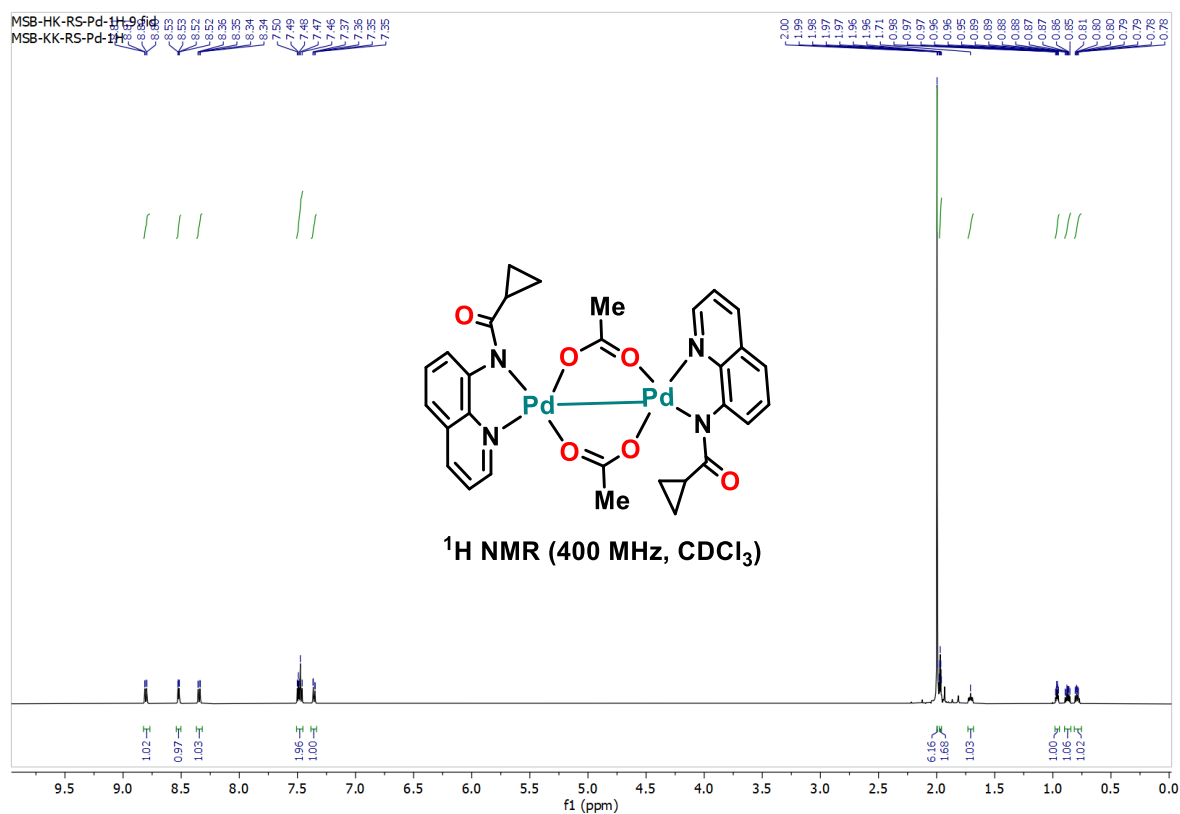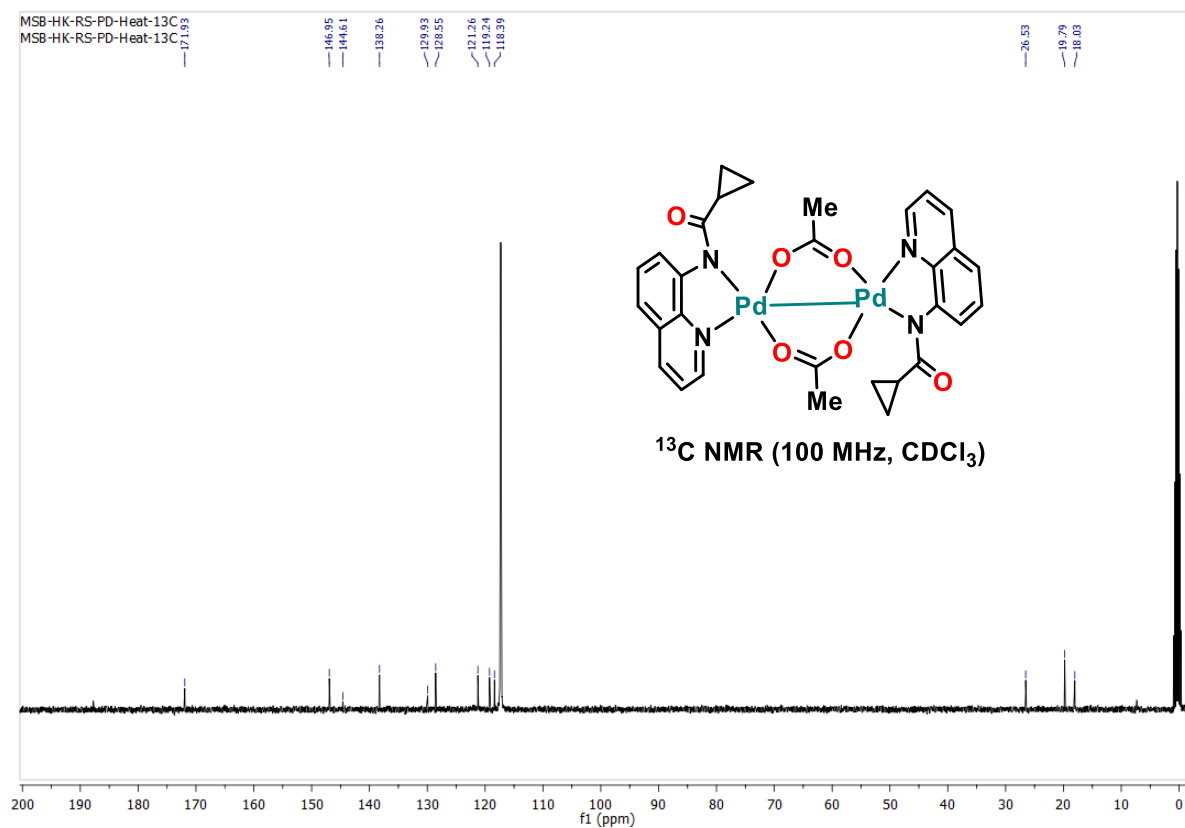

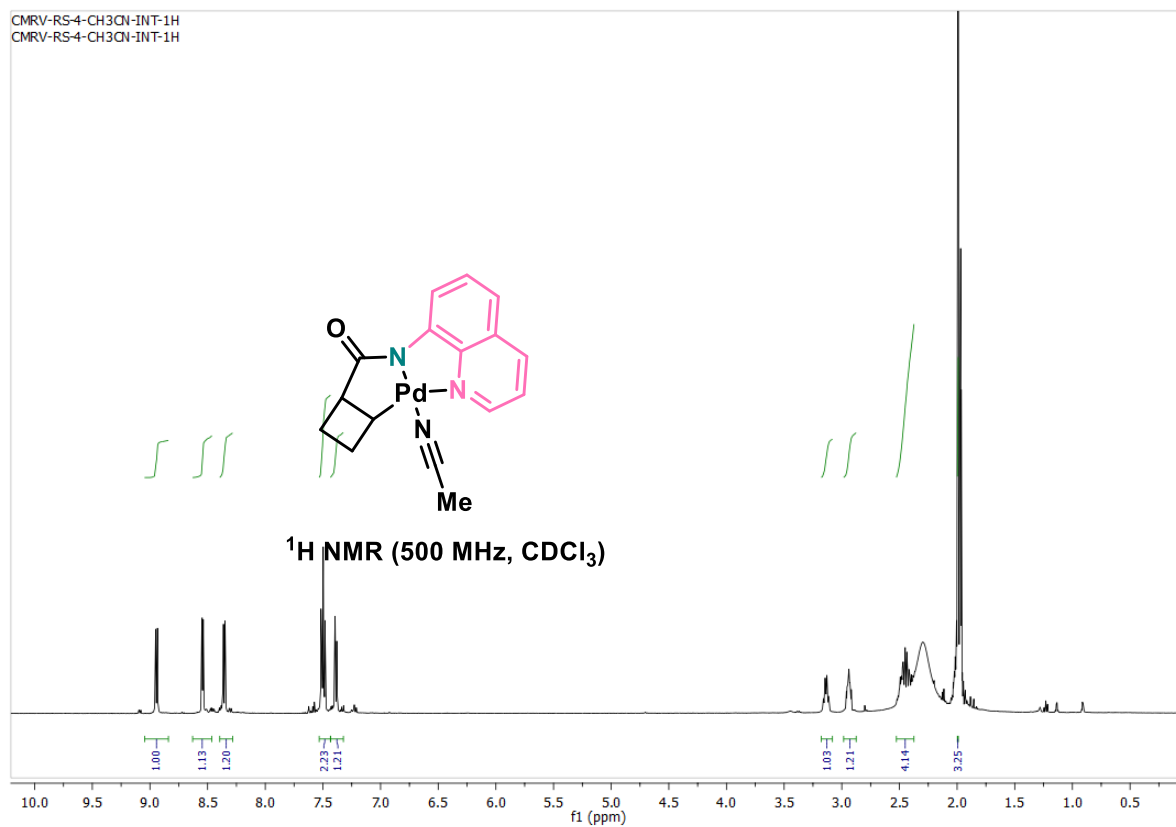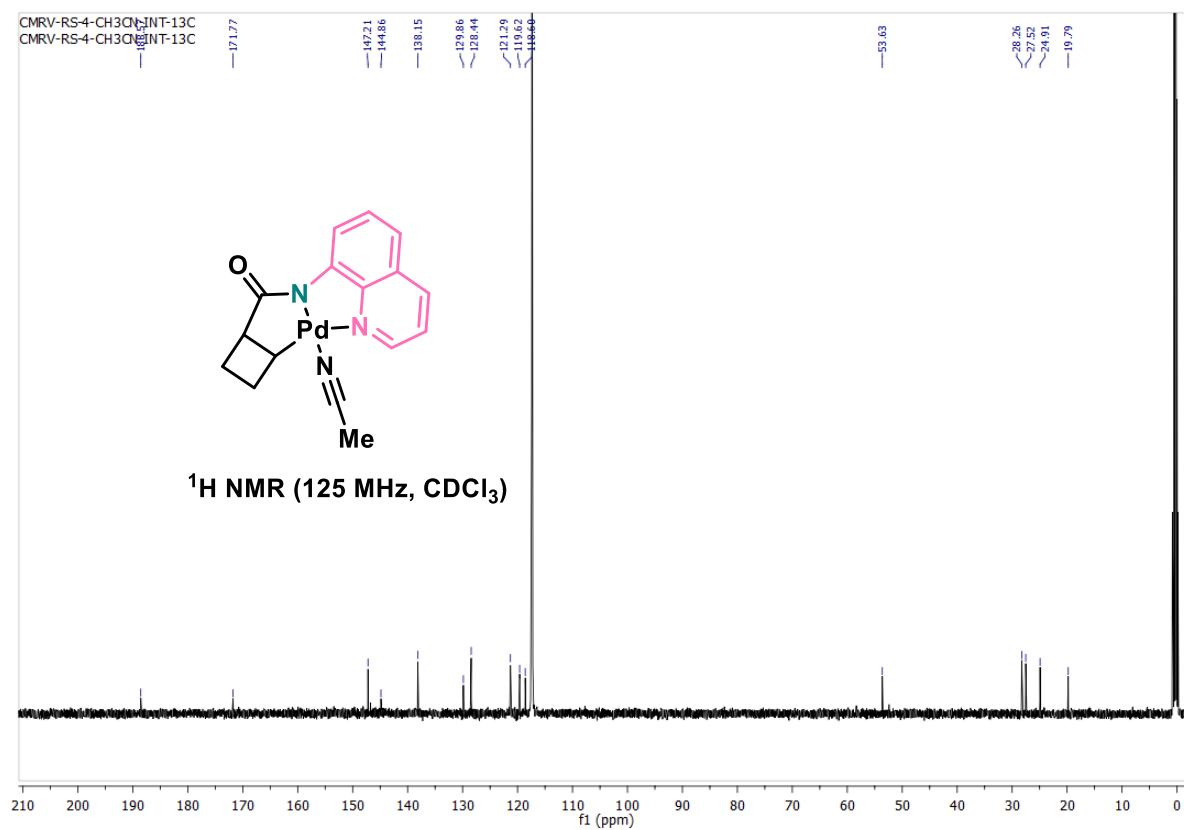

CMRV-RS-INT-4-PY-1H-2  
CMRV-RS-INT-4-PY-1H-2

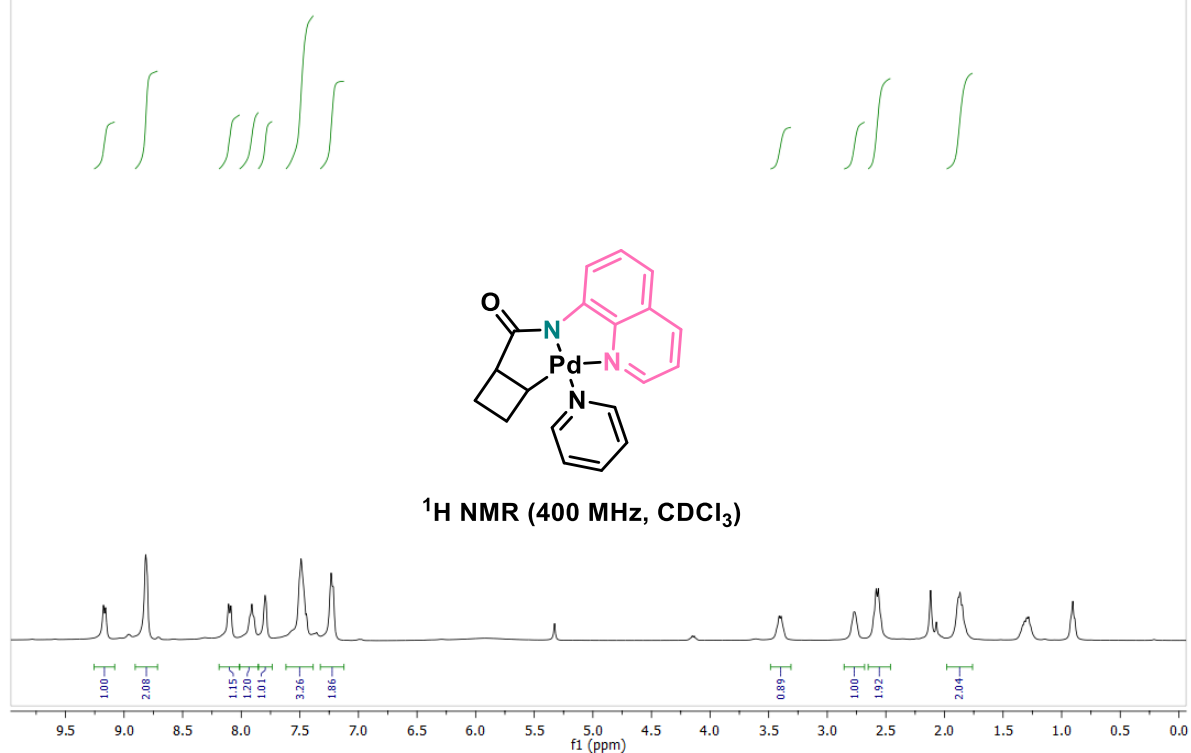

CMRV-RS-INT-4-PY-1H-2-13c  
CMRV-RS-INT-4-PY-1H-2-13c

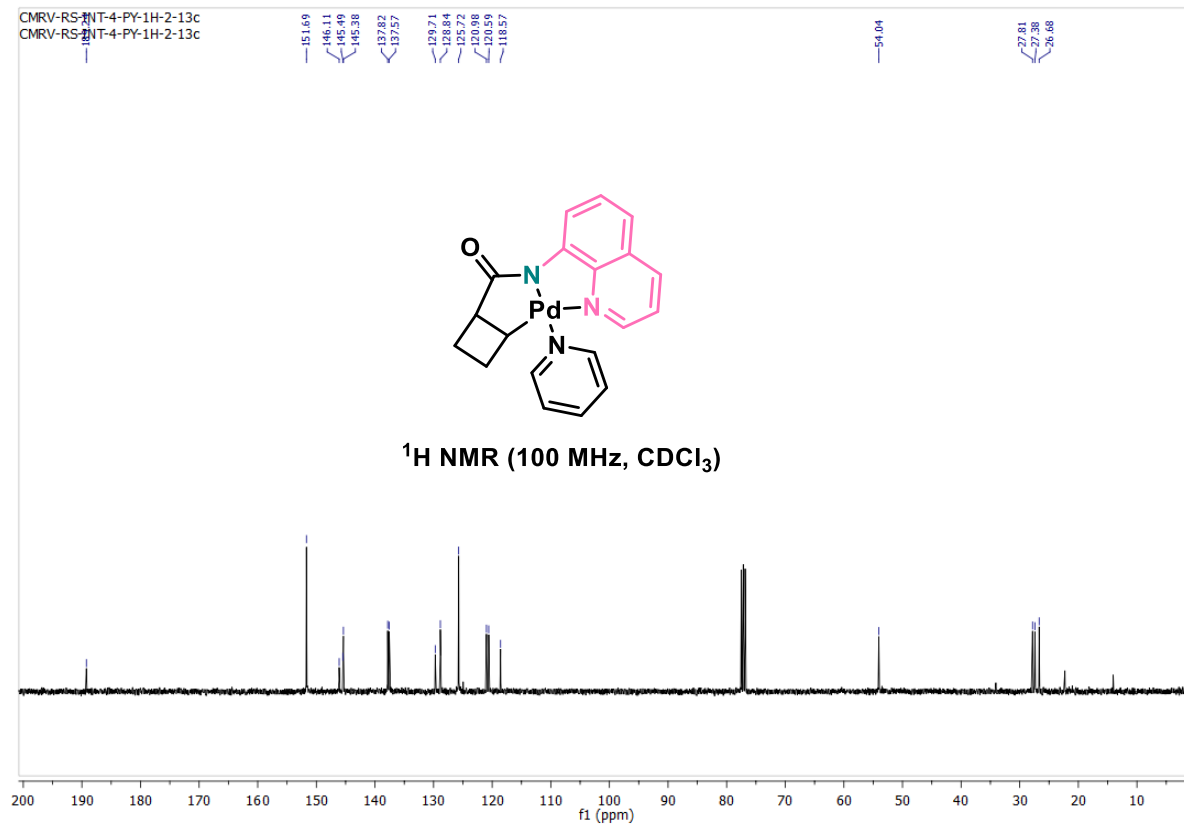

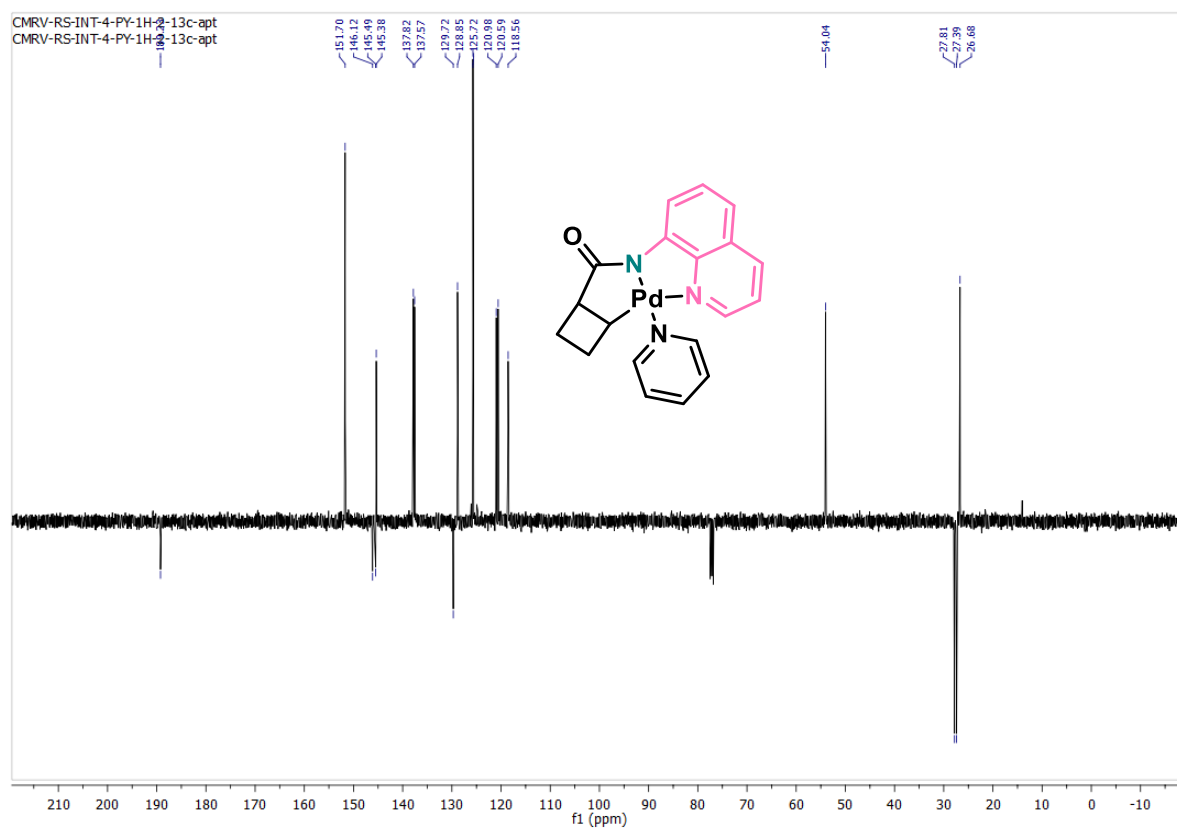



CMRV-RS-INT-5-Pd-1H  
CMRV-RS-INT-5-Pd-1H

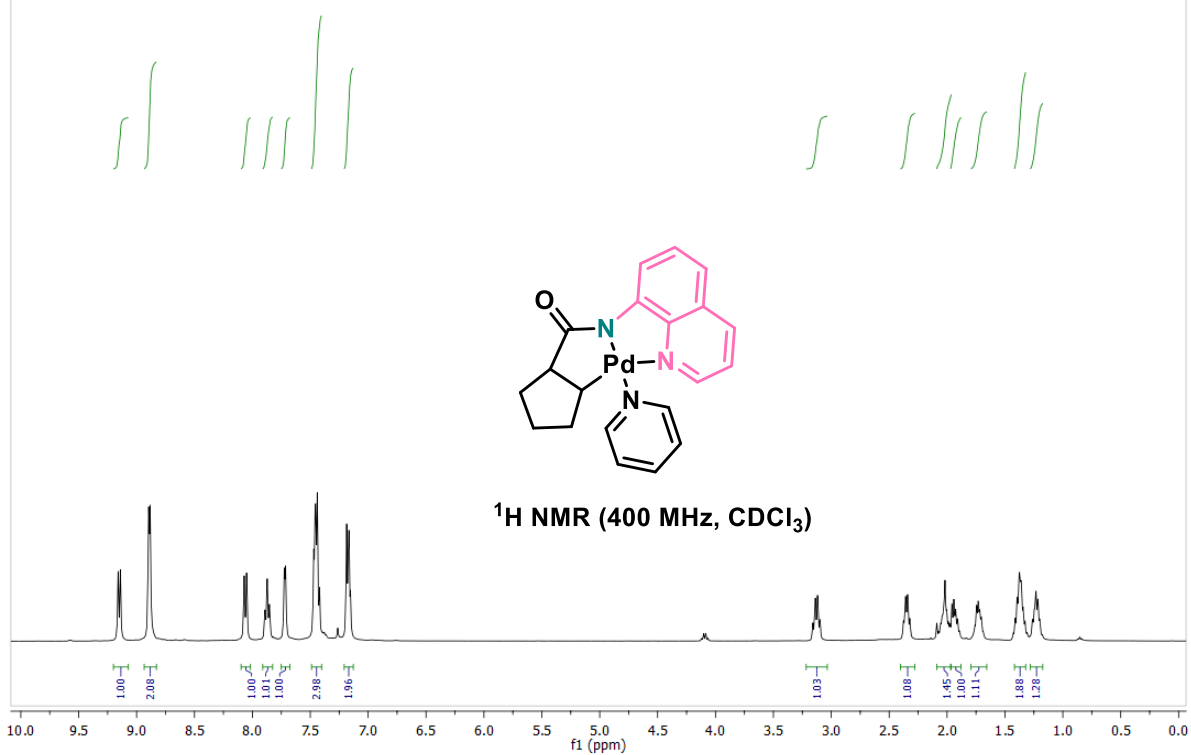

CMRV-RS-INT-5-Pd-13C  
CMRV-RS-INT-5-Pd-13C

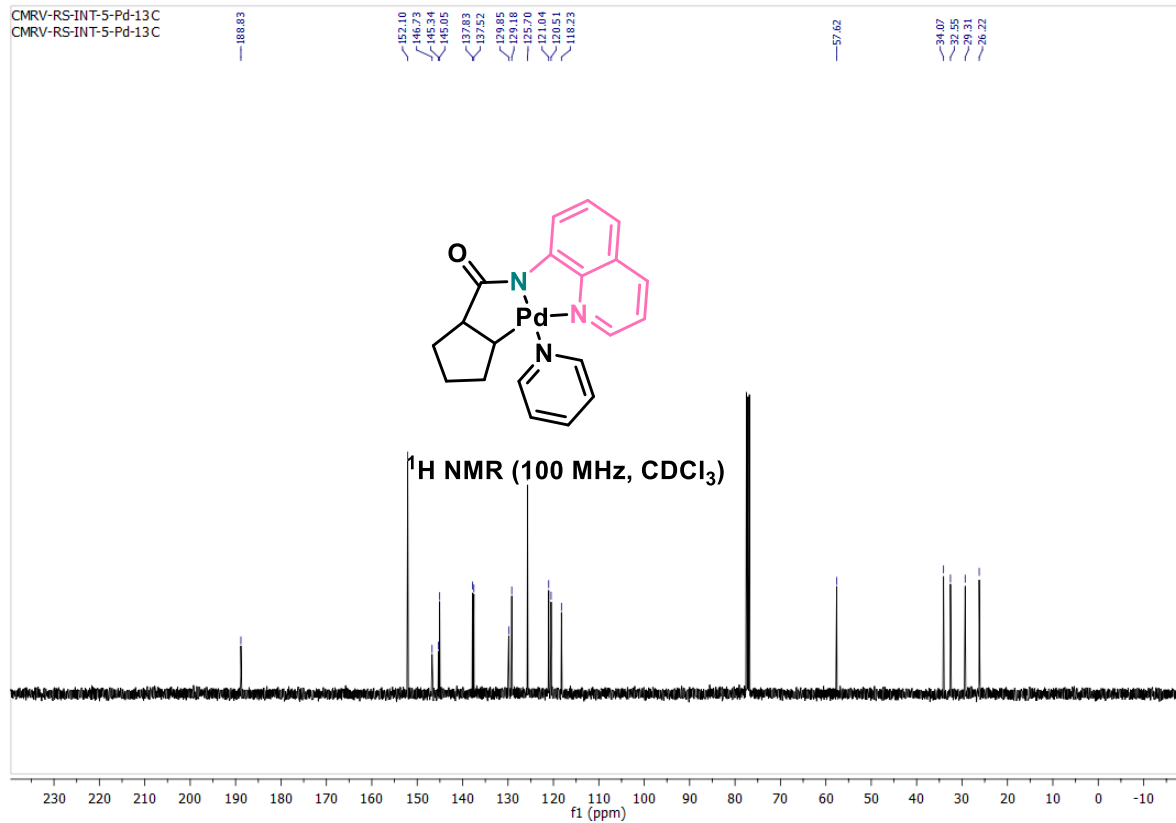

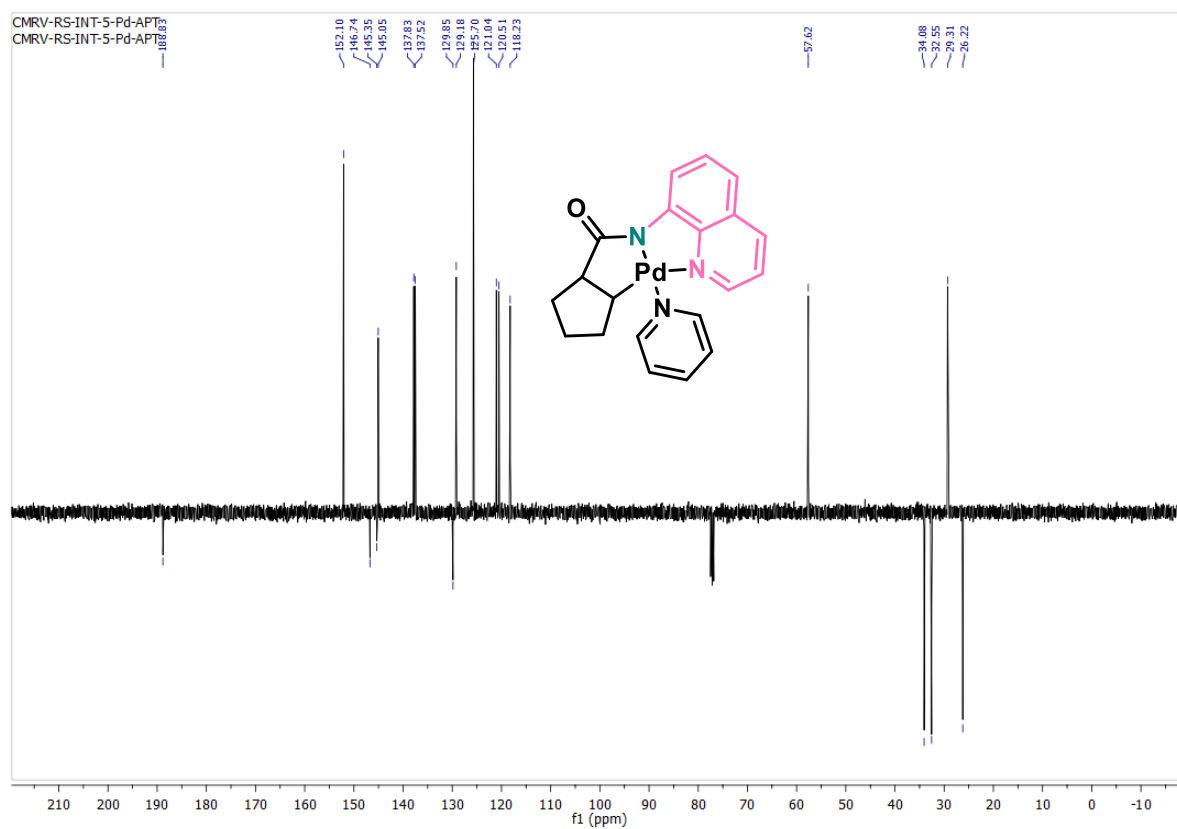

Supplement: d2sc05188e1.pdf [file d2sc05188e1.pdf]
